# Supplementary material for: Quantifiable polarity match effect on C–H bond cleavage reactivity and its limits in reaction design
Source: Royal Society of Chemistry journal article supplement (doi:10.1039/d2dt04018b), 2023-01-01
Supplement: d2dt04018b1.pdf [file d2dt04018b1.pdf]

Supporting Information for:

**Quantifiable Polarity Match Effect on C–H Bond Cleavage Reactivity  
and its Limits in Reaction Design**

Mauricio Maldonado-Domínguez<sup>a,\*</sup> and Martin Srnec<sup>a,\*</sup>

<sup>a</sup>*J. Heyrovský Institute of Physical Chemistry, The Czech Academy of Sciences, Dolejškova 3, Prague 8, 18223, Czech Republic.*

**email addresses:** mauricio.maldonado@jh-inst.cas.cz; martin.srnec@jh-inst.cas.cz

**Table of contents**

| <b>Section</b>                                                                         | <b>Page</b> |
|----------------------------------------------------------------------------------------|-------------|
| Proof of equivalence between $\omega_{Sub\cdot}$ and $\omega_{SubH}$                   | S2          |
| Thermodynamic data for all organic substrates and solvents from Figure 3               | S3          |
| Linear regressions for H-donors from Figure 4                                          | S4          |
| Thermodynamic data for all model organic substrates from Figure 4                      | S5          |
| Classification of C-H substrates from Figure 4 as polar or nonpolar                    | S7          |
| Correlation between C-H bond BDFE and atomic charges                                   | S9          |
| Reactivity data for all reactions presented in Figures 5-6                             | S10         |
| Thermodynamic descriptors and relevant atomic charges for oxidants in Figure 7         | S11         |
| Reactivity data for all reactions presented in Figure 8                                | S12         |
| Steric effects in the HAA reaction between $L_4Co^{III}O$ and 9- <i>t</i> Bu-fluorene  | S13         |
| Prescription for application of the D3 correction with the B3LYP* functional           | S14         |
| Half-reaction thermocycle for the $L_1Co^{III}O$ oxidant                               | S17         |
| Performance of B3LYP* on the prediction of HAA barriers for the $L_1Co^{III}O$ oxidant | S19         |
| Prediction of energetics and ground spin states by different density functionals       | S20         |
| Cartesian coordinates for all species presented in this work                           | S21         |
| References                                                                             | S227        |

## Proof of equivalence between $\omega_{\text{Sub}\cdot}$ and $\omega_{\text{SubH}}$

Following the thermocycle from **Figure 1A** for a generic C-H substrate radical, Sub $\cdot$ , the potential disparity,  $\omega_{\text{Sub}\cdot}$ , is:

$$\omega_{\text{Sub}\cdot} = \frac{1}{\sqrt{2}} \left( E_{\text{Sub}\cdot}^{\circ} - \frac{RT}{F} \ln(10) \times pK_{a,\text{Sub}\cdot} \right) \quad (\text{S1})$$

which can be expressed in terms of the Gibbs free energy for each species in the thermocycle as:

$$\omega_{\text{Sub}\cdot} = \frac{1}{F\sqrt{2}} \left( (G_{\text{Sub}\cdot} - G_{\text{Sub}^-} - FE_{\text{Ref}}^{\circ}) - (G_{\text{Sub}\cdot} + G_{\text{H}^+} - G_{\text{SubH}^+}) \right) \quad (\text{S2})$$

ultimately leading to:

$$\omega_{\text{Sub}\cdot} = \frac{1}{F\sqrt{2}} (G_{\text{SubH}^+} - G_{\text{Sub}^-} - FE_{\text{Ref}}^{\circ} - G_{\text{H}^+}) \quad (\text{S3})$$

which, as seen, only depends on the Gibbs free energy of the off-diagonal states from the thermocycle. By analogy, the potential disparity of the native substrate,  $\omega_{\text{SubH}}$ , is:

$$\omega_{\text{SubH}} = \frac{1}{F\sqrt{2}} \left( (G_{\text{SubH}^+} - G_{\text{SubH}} - FE_{\text{Ref}}^{\circ}) - (G_{\text{Sub}^-} + G_{\text{H}^+} - G_{\text{SubH}}) \right) \quad (\text{S4})$$

ultimately leading to:

$$\omega_{\text{SubH}} = \frac{1}{F\sqrt{2}} (G_{\text{SubH}^+} - G_{\text{Sub}^-} - FE_{\text{Ref}}^{\circ} - G_{\text{H}^+}) \quad (\text{S5})$$

Equations S3 and S5 demonstrate the equivalence between  $\omega_{\text{Sub}\cdot}$  and  $\omega_{\text{SubH}}$

### Thermodynamic data for all organic substrates and solvents from Figure 3

**Table S1.** Thermodynamic data and relevant H-atom  $q_{ESP}$  charges for the set of substrates and solvents from **Figure 3**. All energies were calculated at the B3LYP\*(D3)/def2-SVP//def2-TZVP level of theory at 298 K, with CPCM solvation in MeCN. All values are given in kcal mol<sup>-1</sup>. Charges were obtained using the Atoms-in-Molecules approach on the DFT-obtained electron density, on the 0.001 isosurface.

| Substrate                       | $(RT\ln(10)/F)pK_a^a$ | $E^{\circ b}$ | BDFE <sup>c</sup> | $\omega^d$ | $\mu^e$ | $q_{ESP}^f$ | $q_{AIM}^g$ |
|---------------------------------|-----------------------|---------------|-------------------|------------|---------|-------------|-------------|
| CHD                             | 2.973                 | 0.935         | 65.2              | 0.403      | -2.234  | 0.008       | 0.012       |
| DHA                             | 2.651                 | 1.365         | 68.1              | 0.935      | -2.132  | 0.013       | 0.033       |
| Xanthene                        | 2.658                 | 1.012         | 66.7              | 0.681      | -1.973  | 0.018       | 0.036       |
| Fluorene                        | 2.248                 | 1.104         | 72.5              | 1.036      | -1.390  | 0.017       | 0.048       |
| Ph <sub>2</sub> CH <sub>2</sub> | 2.771                 | 1.557         | 74.2              | 0.986      | -1.976  | 0.014       | 0.027       |
| 9- <sup>t</sup> Bu-fluorene     | 2.382                 | 1.056         | 72.2              | 0.907      | -1.473  | 0.014       | 0.031       |
| 9-Ph-fluorene                   | 1.984                 | 1.102         | 67.1              | 1.221      | -1.535  | 0.017       | 0.046       |
| MeCN                            | 2.694                 | 4.520         | 87.5              | 3.135      | -3.199  | 0.043       | 0.095       |
| THF                             | 4.237                 | 2.085         | 84.4              | 0.322      | -2.760  | 0.004       | 0.006       |

<sup>a</sup> Acidobasic potential, expressed in V.

<sup>b</sup> Reduction potential, expressed in V using the Cp/Cp<sup>+</sup> pair in MeCN as a reference.

<sup>c</sup> Bond dissociation free energy, in kcal mol<sup>-1</sup>.

<sup>d</sup> Potential disparity, calculated as shown in **Figure 1** in the main text, expressed in V.

<sup>e</sup> Potential duality, calculated as shown in **Figure 1** in the main text, expressed in V.

<sup>f</sup> Electrostatic potential (ESP)-derived atomic charges, expressed in  $e$ .

<sup>g</sup> AIM-integrated atomic charges, expressed in  $e$ .

## Linear regressions for H-donors from Figure 4

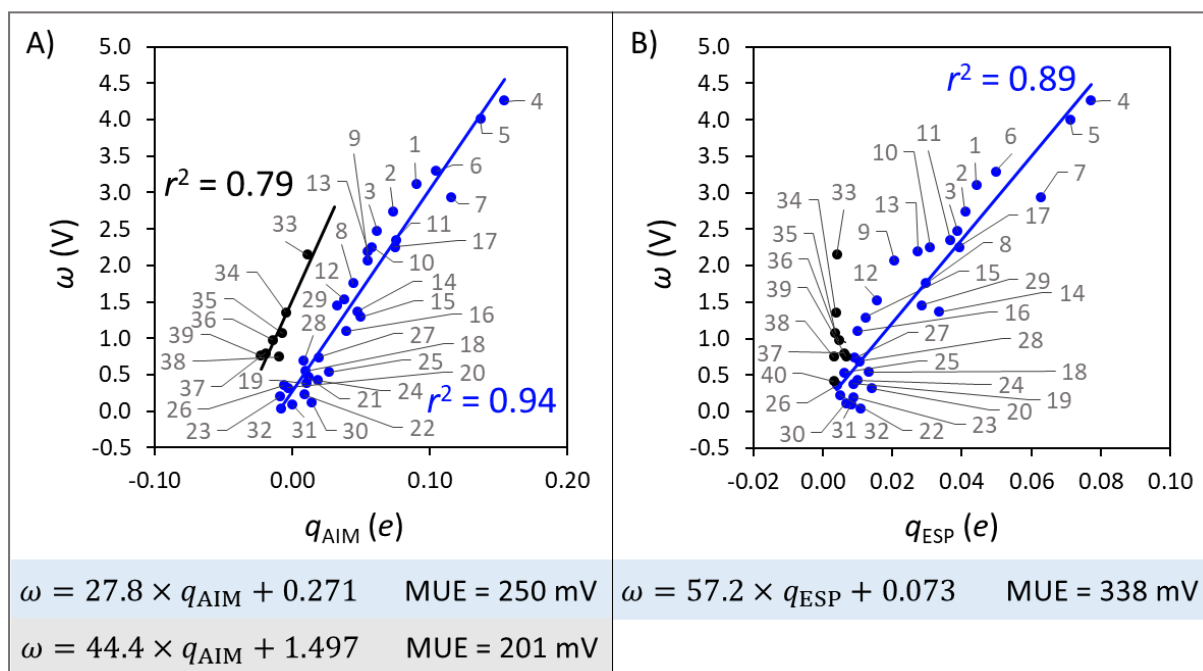

**Figure S1.** **A)** Correlation between the AIM charge of polar and nonpolar hydrogen atoms (in *blue* and *black*, respectively) and the potential disparity  $\omega$  of the corresponding C–H bond substrates from **Figure 4**. **B)** Correlation between the AIM charge of polar hydrogen atoms (in *blue*) and the potential disparity  $\omega$ . No meaningful fit was obtained for the set of nonpolar substrates (in *black*) under this charge scheme. Least-squares linear fits, and their corresponding mean unsigned errors (MUE) are included.

## Thermodynamic data for all model organic substrates from Figure 4

**Table S2.** Energetics and charges for the polar model substrates 1-32 from **Figure 4** (blue set), containing electrophilic H-atoms. All energies were calculated at the B3LYP\*(D3)/def2-SVP//def2-TZVP level of theory at 298 K, with CPCM solvation in MeCN. All values are given in kcal mol<sup>-1</sup>. Charges were obtained using the Atoms-in-Molecules approach on the DFT-obtained electron density, on the 0.001 isosurface.

| Substrate | $pK_a^a$ | $E^{\circ,b}$ | BDFE <sup>c</sup> | $\omega^d$ | $\mu^e$ | $q_{ESP}^f$ | $q_{AIM}^g$ |
|-----------|----------|---------------|-------------------|------------|---------|-------------|-------------|
| 1         | 56.5     | 4.243         | 86.6              | 3.114      | 5.362   | 0.0442      | 0.0900      |
| 2         | 61.0     | 3.907         | 81.4              | 2.740      | 5.313   | 0.0410      | 0.0734      |
| 3         | 62.7     | 3.612         | 76.7              | 2.477      | 5.175   | 0.0388      | 0.0614      |
| 4         | 25.5     | 4.525         | 78.7              | 4.264      | 4.266   | 0.0771      | 0.1540      |
| 5         | 27.9     | 4.271         | 73.1              | 4.009      | 4.186   | 0.0712      | 0.1366      |
| 6         | 30.9     | 3.389         | 82.2              | 3.295      | 3.688   | 0.0497      | 0.1045      |
| 7         | 28.9     | 2.794         | 81.0              | 2.937      | 3.184   | 0.0627      | 0.1150      |
| 8         | 54.2     | 2.226         | 87.2              | 1.757      | 3.840   | 0.0297      | 0.0442      |
| 9         | 58.2     | 2.836         | 90.1              | 2.068      | 4.439   | 0.0207      | 0.0549      |
| 10        | 35.4     | 2.116         | 82.7              | 2.256      | 2.976   | 0.0309      | 0.0580      |
| 11        | 35.8     | 2.268         | 85.3              | 2.351      | 3.100   | 0.0367      | 0.0751      |
| 12        | 54.5     | 1.922         | 81.0              | 1.532      | 3.638   | 0.0157      | 0.0380      |
| 13        | 57.4     | 2.986         | 83.8              | 2.199      | 4.511   | 0.0274      | 0.0547      |
| 14        | 84.4     | 2.986         | 88.4              | 1.370      | 5.640   | 0.0335      | 0.0475      |
| 15        | 83.4     | 2.836         | 89.6              | 1.294      | 5.492   | 0.0122      | 0.0496      |
| 16        | 87.6     | 2.743         | 87.9              | 1.099      | 5.602   | 0.0101      | 0.0390      |
| 17        | 56.6     | 3.031         | 90.7              | 2.255      | 4.510   | 0.0392      | 0.0744      |
| 18        | 92.0     | 2.159         | 86.7              | 0.552      | 5.373   | 0.0131      | 0.0097      |
| 19        | 94.8     | 2.044         | 86.1              | 0.384      | 5.409   | 0.0087      | 0.0101      |
| 20        | 96.0     | 2.008         | 84.6              | 0.321      | 5.433   | 0.0142      | -0.0032     |
| 21        | 91.3     | 2.008         | 83.3              | 0.467      | 5.237   | 0.0185      | 0.0115      |
| 22        | 96.8     | 1.911         | 84.5              | 0.229      | 5.398   | 0.0050      | 0.0087      |
| 23        | 98.7     | 1.956         | 82.8              | 0.202      | 5.510   | 0.0087      | -0.0093     |
| 24        | 93.1     | 2.031         | 86.6              | 0.427      | 5.328   | 0.0101      | 0.0184      |
| 25        | 92.4     | 2.156         | 99.0              | 0.539      | 5.388   | 0.0063      | 0.0269      |
| 26        | 97.7     | 2.130         | 88.8              | 0.358      | 5.591   | 0.0041      | -0.0061     |
| 27        | 72.5     | 1.581         | 83.3              | 0.741      | 4.149   | 0.0091      | 0.0194      |
| 28        | 72.7     | 1.521         | 76.7              | 0.691      | 4.115   | 0.0106      | 0.0081      |
| 29        | 58.2     | 1.976         | 81.0              | 1.458      | 3.830   | 0.0285      | 0.0322      |
| 30        | 76.6     | 0.876         | 80.7              | 0.116      | 3.822   | 0.0066      | 0.0141      |
| 31        | 77.6     | 0.885         | 77.3              | 0.094      | 3.870   | 0.0082      | 0.0000      |
| 32        | 78.8     | 0.866         | 75.7              | 0.042      | 3.907   | 0.0109      | -0.0082     |

<sup>a</sup> Unitless. Calculated in MeCN using the free energy of solvation of the proton,  $G_H = -260.2$  kcal mol<sup>-1</sup>.

<sup>b</sup> Reduction potential, expressed in V using the Cp/Cp<sup>+</sup> pair in MeCN as a reference.

<sup>c</sup> Bond dissociation free energy, in kcal mol<sup>-1</sup>.

<sup>d</sup> Potential disparity, calculated as shown in **Figure 1** in the main text, expressed in V.

<sup>e</sup> Potential duality, calculated as shown in **Figure 1** in the main text, expressed in V.

<sup>f</sup> Electrostatic potential (ESP)-derived atomic charges, expressed in  $e$ .

<sup>g</sup> AIM-integrated atomic charges, expressed in  $e$ .

**Table S3.** Energetics and charges for the nonpolar model substrates 33-40 from **Figure 4** (black set), containing nucleophilic H-atoms. All energies were calculated at the B3LYP\*(D3)/def2-SVP//def2-TZVP level of theory at 298 K, with CPCM solvation in MeCN. All values are given in kcal mol<sup>-1</sup>. Charges were obtained using the Atoms-in-Molecules approach on the DFT-obtained electron density, on the 0.001 isosurface.

| Substrate | $pK_a^a$ | $E^{\circ,b}$ | BDFE <sup>c</sup> | $\omega^d$ | $\mu^e$ | $q_{ESP}^f$ | $q_{AIM}^g$ |
|-----------|----------|---------------|-------------------|------------|---------|-------------|-------------|
| 33        | 90.1     | 4.334         | 95.6              | 2.149      | 6.832   | 0.0041      | 0.0109      |
| 34        | 96.0     | 3.474         | 90.1              | 1.357      | 6.470   | 0.0037      | -0.0046     |
| 35        | 96.7     | 3.094         | 91.6              | 1.071      | 6.231   | 0.0036      | -0.0074     |
| 36        | 99.7     | 3.094         | 87.5              | 0.978      | 6.356   | 0.0046      | -0.0144     |
| 37        | 98.8     | 2.802         | 85.1              | 0.799      | 6.112   | 0.0061      | -0.0196     |
| 38        | 97.4     | 2.078         | 87.3              | 0.751      | 5.541   | 0.0032      | -0.0100     |
| 39        | 98.7     | 2.728         | 84.1              | 0.760      | 6.055   | 0.0067      | -0.0228     |
| 40        | 98.4     | 2.730         | 88.8              | 0.418      | 6.044   | 0.0031      | -0.0152     |

<sup>a</sup> Unitless. Calculated in MeCN using the free energy of solvation of the proton,  $G_H = -260.2$  kcal mol<sup>-1</sup>.

<sup>b</sup> Reduction potential, expressed in V using the Cp/Cp<sup>+</sup> pair in MeCN as a reference.

<sup>c</sup> Bond dissociation free energy, in kcal mol<sup>-1</sup>.

<sup>d</sup> Potential disparity, calculated as shown in **Figure 1** in the main text, expressed in V.

<sup>e</sup> Potential duality, calculated as shown in **Figure 1** in the main text, expressed in V.

<sup>f</sup> Electrostatic potential (ESP)-derived atomic charges, expressed in  $e$ .

<sup>g</sup> AIM-integrated atomic charges, expressed in  $e$ .

## Classification of C-H substrates from Figure 4 as polar or nonpolar

As seen in **Figure S2**, visual inspection of the key thermodynamic descriptors from **Tables S2-S3**, suggests that the potential duality  $\mu$  of the reacting C-H bonds and the atomic charges are important factors in determining their classification as polar or nonpolar. The relevance of BDFE and potential disparity  $\omega$ , however, are less clear.

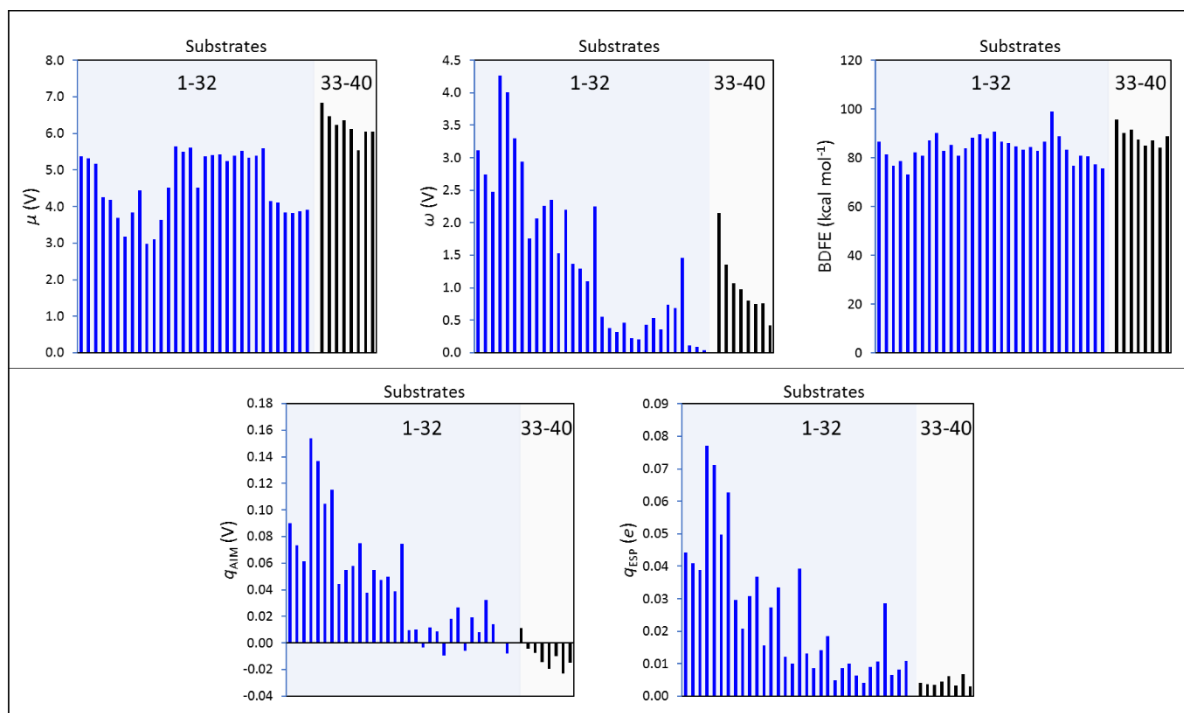

**Figure S2.** Thermodynamic descriptors (potential duality  $\mu$ , potential disparity  $\omega$ , and BDFE) of the 40 C-H substrates from **Figure 4** (*top*), and atomic charges obtained through the  $q_{\text{AIM}}$  and  $q_{\text{ESP}}$  schemes (*bottom*). Blue and black colors indicate polar and nonpolar C-H bonds, respectively.

A straightforward to weight the importance of all these descriptors in substrate classification is through the training of an artificial neural network (ANN). Consequently, we trained an ANN consisting of three layers (input, hidden and output) and eight neurons (four inputs; three hidden; one output). The structure of the trained ANN and the relative importance of the evaluated descriptors derived from it are presented in **Figure S3**.

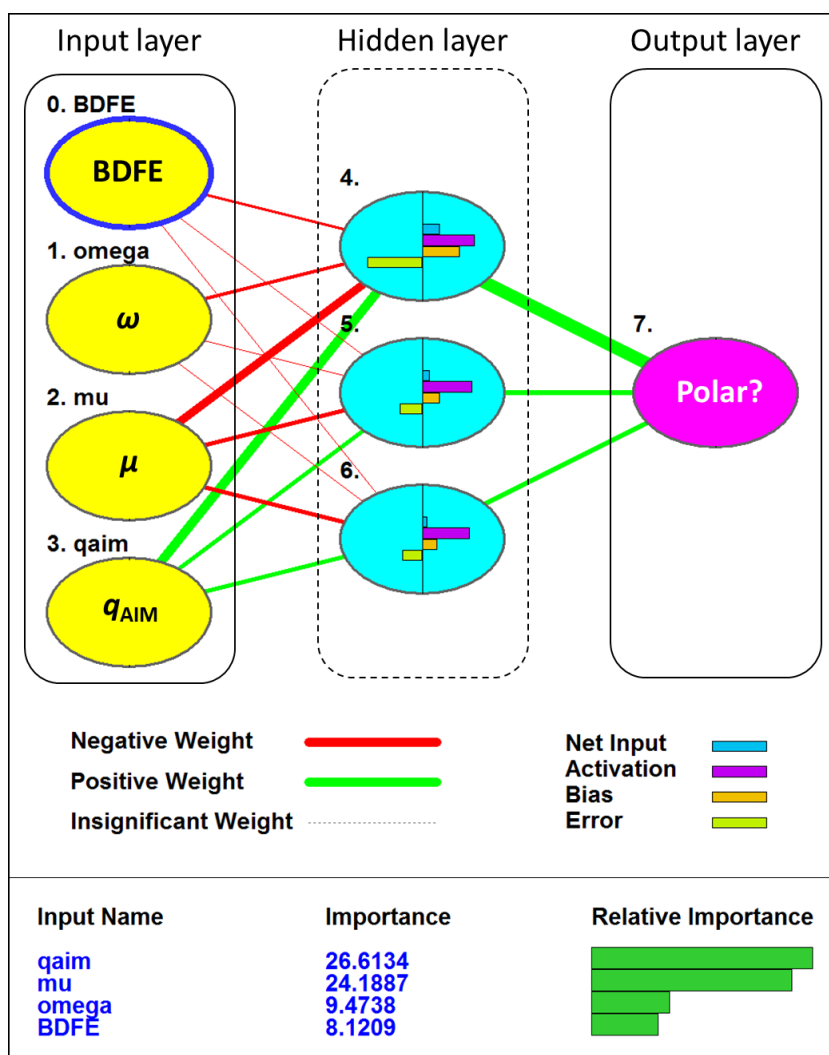

**Figure S3.** Schematic representation of the artificial neural network trained with the data from **Tables S2-S3** (*top*), and relative importance of the input descriptors in the classification of C-H substrates as polar or nonpolar (*bottom*).

As shown in **Figure S3**, the ANN model confirms the qualitative observation of potential duality and atomic charge as being the dominant determinants in the classification of substrates as polar or nonpolar, whereas the potential duality and the C-H bond BDFE are much less decisive for this classification.



## Correlation between C-H bond BDFE and atomic charges

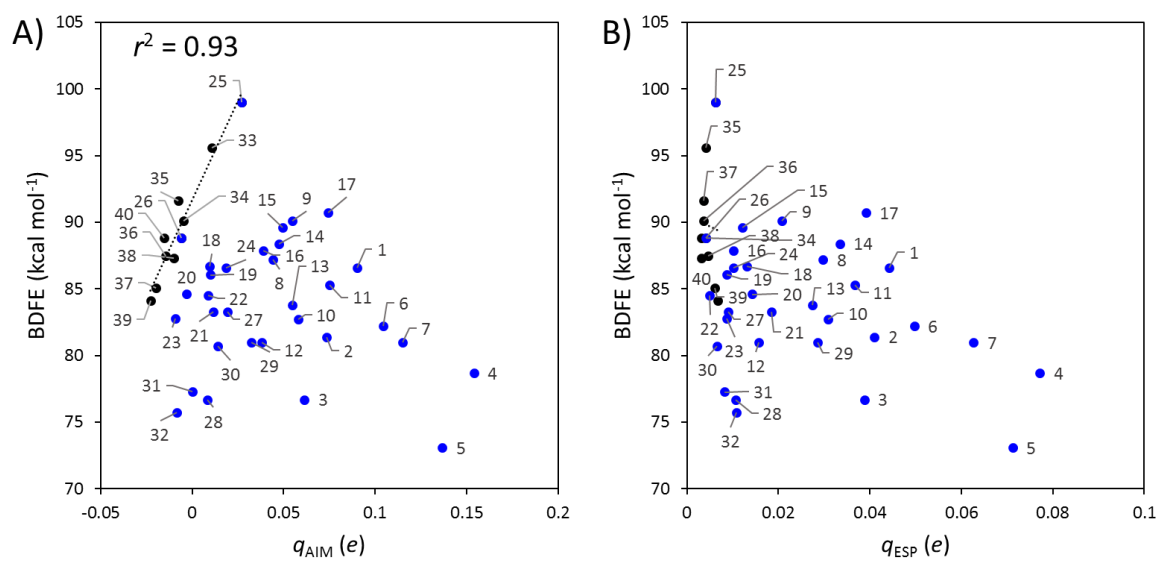

**Figure S4.** **A.** Correlation between bond dissociation free energy (BDFE) and AIM-integrated atomic charges. **B.** Correlation between bond dissociation free energy (BDFE) and ESP-mapped atomic charges.

## Reactivity data for all reactions presented in Figures 5-6

**Table S4.** Reactivity data for reactions between  $L_1Co^{III}O$  and all substrates and solvents from **Figure 3**. All energies were calculated at the B3LYP\*(D3)/def2-SVP//def2-TZVP level of theory at 298 K, with CPCM solvation in THF. All values are given in kcal mol<sup>-1</sup>. Charges were obtained using the Atoms-in-Molecules approach on the 0.001 isosurface of the DFT-obtained electron density.

| Substrate                       | $\Delta G_{DFT}^\ddagger$ <sup>a</sup> | $\Delta G_0$ <sup>b</sup> | $\Delta G_{intrinsic}^\ddagger$ <sup>c</sup> | $F\eta$ <sup>d</sup> | $F\sigma$ <sup>e</sup> | $\Delta q_{ESP}$ <sup>f</sup> | $\Delta q_{AIM}$ <sup>g</sup> | $\Delta G_{thermo}^\ddagger$ <sup>h</sup> |
|---------------------------------|----------------------------------------|---------------------------|----------------------------------------------|----------------------|------------------------|-------------------------------|-------------------------------|-------------------------------------------|
| CHD                             | 14.0                                   | -15.2                     | 21.6                                         | -29.3                | 38.3                   | -0.098                        | -1.022                        | -5.3                                      |
| DHA                             | 10.1                                   | -12.3                     | 14.4                                         | -41.6                | 35.9                   | -0.103                        | -1.042                        | -7.6                                      |
| Xanthene                        | 9.3                                    | -13.7                     | 16.2                                         | -35.7                | 32.3                   | -0.108                        | -1.046                        | -7.7                                      |
| Fluorene                        | 7.4                                    | -7.8                      | 11.3                                         | -43.9                | 18.8                   | -0.107                        | -1.058                        | -10.2                                     |
| Ph <sub>2</sub> CH <sub>2</sub> | 14.2                                   | -6.1                      | 17.3                                         | -42.8                | 32.4                   | -0.104                        | -1.036                        | -5.7                                      |
| 9- <sup>t</sup> Bu-fluorene     | 11.2                                   | -8.2                      | 15.3                                         | -41.0                | 20.7                   | -0.104                        | -1.040                        | -9.1                                      |
| 9-Ph-fluorene                   | 3.5                                    | -13.3                     | 10.1                                         | -48.2                | 22.2                   | -0.107                        | -1.056                        | -13.1                                     |
| MeCN                            | 17.6                                   | 7.2                       | 14.0                                         | -92.3                | 60.6                   | -0.133                        | -1.105                        | -4.4                                      |
| THF                             | 20.7                                   | 4.1                       | 18.7                                         | -27.5                | 50.4                   | -0.094                        | -1.016                        | 7.8                                       |

<sup>a</sup> Gibbs free energy difference between the transition state in its lowest spin state and the separated reactants in solution, expressed in kcal mol<sup>-1</sup>.

<sup>b</sup> Gibbs free energy difference between separated reactants and separated products in solution, expressed in kcal mol<sup>-1</sup>.

<sup>c</sup>  $\Delta G_{intrinsic}^\ddagger \approx \Delta G_{DFT}^\ddagger - 1/2 \Delta G_0$

<sup>d</sup> Factor of asynchronicity, calculated as shown in **Figure 1** in the main text, expressed in kcal mol<sup>-1</sup>.

<sup>e</sup> Factor of frustration, calculated as shown in **Figure 1** in the main text, expressed in kcal mol<sup>-1</sup>.

<sup>f</sup> Electrostatic potential (ESP)-derived atomic charges, expressed in *e*.

<sup>g</sup> AIM-integrated atomic charges, expressed in *e*.

<sup>h</sup> Thermodynamic projection of the HAA barrier,  $\Delta G_{thermo}^\ddagger = 1/2 \Delta G_0 + F/4 (|\sigma| - |\eta|)$

**Table S5.** HAA barriers for reactions between  $L_1Co^{III}O$  and all substrates and solvents from **Figure 3**, in all accessible spin states. All energies were calculated at the B3LYP\*(D3)/def2-SVP//def2-TZVP level of theory at 298 K, with CPCM solvation in THF. All values are given in kcal mol<sup>-1</sup>. Missing values correspond to states that could not be located.

| Substrate                       | $\Delta G_{DFT}^\ddagger$ (S=0, closed shell) | $\Delta G_{DFT}^\ddagger$ (S=0, open shell) | $\Delta G_{DFT}^\ddagger$ (S=1) | $\Delta G_{DFT}^\ddagger$ (S=2) |
|---------------------------------|-----------------------------------------------|---------------------------------------------|---------------------------------|---------------------------------|
| CHD                             | 17.5                                          | 16.3                                        | 14.0                            | 15.3                            |
| DHA                             | 10.1                                          | -                                           | 9.0                             | 11.3                            |
| Xanthene                        | 9.3                                           | -                                           | 10.3                            | 11.7                            |
| Fluorene                        | 7.4                                           | -                                           | 10.6                            | 12.5                            |
| Ph <sub>2</sub> CH <sub>2</sub> | 14.2                                          | -                                           | 15.6                            | 16.2                            |
| 9- <sup>t</sup> Bu-fluorene     | 11.2                                          | -                                           | -                               | 13.7                            |
| 9-Ph-fluorene                   | 3.5                                           | -                                           | 7.0                             | 8.2                             |
| MeCN                            | -                                             | -                                           | -                               | 17.6                            |
| THF                             | -                                             | 23.4                                        | 23.8                            | 20.7                            |

**Thermodynamic descriptors and relevant atomic charges for relevant atoms for oxidants in Figure 7**

**Table S6.** Comparison between thermodynamic descriptors for oxidants  $L_0Co^{III}O$  to  $L_4Co^{III}O$ , obtained using de B3LYP\* density functional. The def2-SVP//def2-TZVP basis sets were used for geometry optimization and final potential energy calculation, respectively. The D3 dispersion correction and implicit CPCM solvation in MeCN was used in all cases.

|                                | $L_0Co^{III}O$ | $L_1Co^{III}O$ | $L_2Co^{III}O$ | $L_3Co^{III}O$ | $L_4Co^{III}O$ |
|--------------------------------|----------------|----------------|----------------|----------------|----------------|
| $E_{OxH}^o$ (V)                | -1.042         | -0.482         | 0.373          | 0.128          | 1.090          |
| $pK_{a,Ox}$                    | 33.0           | 25.6           | 14.5           | 17.5           | -0.2           |
| $E_{Ox}^o$ (V)                 | -2.728         | -2.325         | -1.348         | -1.656         | 0.324          |
| $pK_{a,OxH}$                   | 61.4           | 56.7           | 43.6           | 47.3           | 12.8           |
| BDFE (kcal mol <sup>-1</sup> ) | 77.5           | 80.3           | 84.9           | 82.9           | 81.4           |
| $\omega$ (V)                   | -1.463         | -0.869         | 0.285          | -0.042         | 2.083          |
| $\mu$ (V)                      | 1.833          | 2.031          | 2.087          | 2.067          | 1.304          |
| $q_{ESP}$ (e)                  | -0.103         | -0.090         | -0.021         | -0.015         | 0.060          |
| $q_{AIM}$ (e)                  | -1.028         | -1.010         | -0.861         | -0.925         | -0.822         |

## Reactivity data for all reactions presented in Figure 8

**Table S7.** Reactivity data for reactions between  $\text{L}_4\text{Co}^{\text{III}}\text{O}$  and all substrates and solvents from **Figure 3**. All energies were calculated at the B3LYP\*(D3)/def2-SVP//def2-TZVP level of theory at 298 K, with CPCM solvation in THF. All values are given in  $\text{kcal mol}^{-1}$ . Charges were obtained using the Atoms-in-Molecules approach on the 0.001 isosurface of the DFT-obtained electron density.

| Substrate                       | $\Delta G_{\text{DFT}}^\ddagger$ <sup>a</sup> | $\Delta G_0$ <sup>b</sup> | $\Delta G_{\text{intrinsic}}^\ddagger$ <sup>c</sup> | $F\eta$ <sup>d</sup> | $F\sigma$ <sup>e</sup> | $\Delta q_{\text{ESP}}^f$ | $\Delta q_{\text{AIM}}^g$ | $\Delta G_{\text{thermo}}^\ddagger$ <sup>h</sup> |
|---------------------------------|-----------------------------------------------|---------------------------|-----------------------------------------------------|----------------------|------------------------|---------------------------|---------------------------|--------------------------------------------------|
| CHD                             | 7.9                                           | -16.2                     | 16.0                                                | 38.7                 | -33.6                  | 0.052                     | -0.834                    | -9.4                                             |
| DHA                             | 7.1                                           | -13.3                     | 13.8                                                | 26.5                 | -35.4                  | 0.048                     | -0.855                    | -4.4                                             |
| Xanthene                        | 8.7                                           | -14.7                     | 16.1                                                | 32.3                 | -29.8                  | 0.042                     | -0.859                    | -8.0                                             |
| Fluorene                        | 9.3                                           | -8.9                      | 13.8                                                | 24.1                 | -24.6                  | 0.043                     | -0.870                    | -4.3                                             |
| Ph <sub>2</sub> CH <sub>2</sub> | 10.9                                          | -7.2                      | 14.5                                                | 25.3                 | -40.5                  | 0.046                     | -0.849                    | 0.2                                              |
| 9- <sup>t</sup> Bu-fluorene     | 15.3                                          | -9.2                      | 19.9                                                | 27.1                 | -26.0                  | 0.047                     | -0.853                    | -4.9                                             |
| 9-Ph-fluorene                   | 8.9                                           | -14.3                     | 16.0                                                | 19.9                 | -20.2                  | 0.044                     | -0.869                    | -7.1                                             |
| MeCN                            | 18.8                                          | 6.1                       | 15.7                                                | -24.3                | -87.6                  | 0.017                     | -0.918                    | 18.9                                             |
| THF                             | 13.1                                          | 3.0                       | 11.6                                                | 40.6                 | -73.0                  | 0.056                     | -0.828                    | 9.6                                              |

<sup>a</sup> Gibbs free energy difference between the transition state in its lowest spin state and the separated reactants in solution, expressed in  $\text{kcal mol}^{-1}$ .

<sup>b</sup> Gibbs free energy difference between separated reactants and separated products in solution, expressed in  $\text{kcal mol}^{-1}$ .

<sup>c</sup>  $\Delta G_{\text{intrinsic}}^\ddagger \approx \Delta G_{\text{DFT}}^\ddagger - 1/2 \Delta G_0$

<sup>d</sup> Factor of asynchronicity, calculated as shown in **Figure 1** in the main text, expressed in  $\text{kcal mol}^{-1}$ .

<sup>e</sup> Factor of frustration, calculated as shown in **Figure 1** in the main text, expressed in  $\text{kcal mol}^{-1}$ .

<sup>f</sup> Electrostatic potential (ESP)-derived atomic charges, expressed in  $e$ .

<sup>g</sup> AIM-integrated atomic charges, expressed in  $e$ .

<sup>h</sup> Thermodynamic projection of the HAA barrier,  $\Delta G_{\text{thermo}}^\ddagger = 1/2 \Delta G_0 + F/4 (|\sigma| - |\eta|)$

**Table S8.** HAA barriers for reactions between  $\text{L}_4\text{Co}^{\text{III}}\text{O}$  and all substrates and solvents from **Figure 3**, in all accessible spin states. All energies were calculated at the B3LYP\*(D3)/def2-SVP//def2-TZVP level of theory at 298 K, with CPCM solvation in THF. All values are given in  $\text{kcal mol}^{-1}$ . Missing values correspond to states that could not be located.

| Substrate                       | $\Delta G_{\text{DFT}}^\ddagger$ (S=0, closed shell) | $\Delta G_{\text{DFT}}^\ddagger$ (S=0, open shell) | $\Delta G_{\text{DFT}}^\ddagger$ (S=1) | $\Delta G_{\text{DFT}}^\ddagger$ (S=2) |
|---------------------------------|------------------------------------------------------|----------------------------------------------------|----------------------------------------|----------------------------------------|
| CHD                             | 16.1                                                 | 10.6                                               | 7.9                                    | 16.0                                   |
| DHA                             | 13.4                                                 | 9.6                                                | 7.1                                    | 12.4                                   |
| Xanthene                        | 14.3                                                 | 11.2                                               | 8.7                                    | 13.5                                   |
| Fluorene                        | 15.2                                                 | -                                                  | 9.3                                    | 18.2                                   |
| Ph <sub>2</sub> CH <sub>2</sub> | 18.6                                                 | 13.4                                               | 10.9                                   | 19.4                                   |
| 9- <sup>t</sup> Bu-fluorene     | 20.7                                                 | -                                                  | 15.3                                   | 23.6                                   |
| 9-Ph-fluorene                   | 13.7                                                 | -                                                  | 8.9                                    | 17.0                                   |
| MeCN                            | -                                                    | 21.6                                               | 18.8                                   | 34.7                                   |
| THF                             | -                                                    | 14.7                                               | 13.1                                   | 18.4                                   |

## Steric effects in the HAA reaction between $L_4Co^{III}O$ and 9-*t*Bu-fluorene

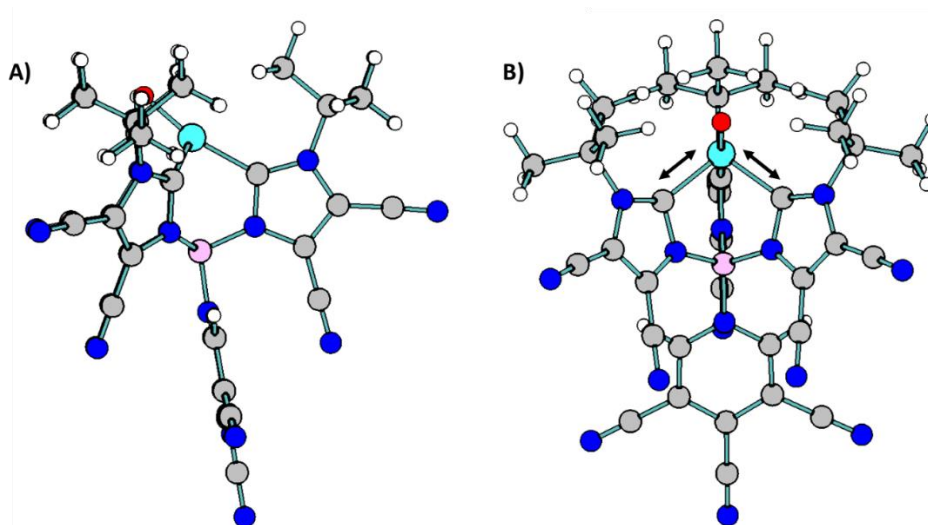

**Figure S5.** A. Lateral view of oxidant  $L_4Co^{III}O$  in its ground  $S = 2$  state, showcasing an HAA-active oxygen atom that is buried between two *t*Bu groups, and inequivalent C-Co bonds. B. Frontal view of  $L_4Co^{III}O$  in its ground  $S = 2$  state, presenting the two equivalent C-Co bonds (black arrows) used to evaluate the effect of sterics at the HAA step in **Figure S6**.

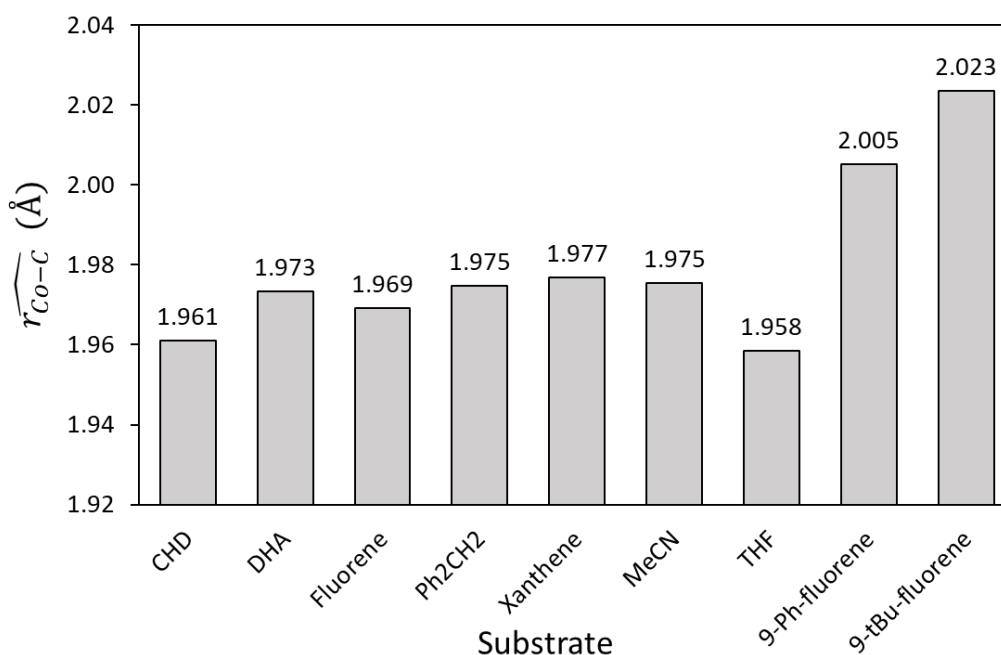

**Figure S6.** Average C-Co distances ( $\widehat{r}_{Co-C}$ ) for the equivalent C-Co bonds in  $L_4Co^{III}O$ , shown in **Figure S2B**, at the transition state for HAA with all substrates from **Figure 3**. As seen, substrate 9-*t*Bu-fluorene shows the largest deviations, arising from steric clash between the *t*Bu groups in both oxidant and substrate.

## Prescription for application of the D3 correction with the B3LYP\* functional

All calculations in this work were carried out with Gaussian 16, and the presented prescription applies only to this program. The B3LYP\* functional is imposed through the following keywords:<sup>1</sup>

BLYP IOp(3/76=1000001500) IOp(3/77=0720008500) IOp(3/78=0810010000)

The coefficients for the D3 dispersion correction, however, are method-dependent and have not been reported for the B3LYP\* functional. For this reason, the values employed in our work with B3LYP\* (15% Fock exchange) were obtained by linear interpolation from the values reported for the BLYP (0% Fock exchange) and B3LYP functionals (20% Fock exchange).<sup>2</sup>

The coefficients obtained in this way are:

BLYP (0% exchange):

IOp(3/174=1000000) IOp(3/175=1682000) IOp(3/176=1094000)

B3LYP (20% exchange):

IOp(3/174=1000000) IOp(3/175=1703000) IOp(3/176=1.261000)

B3LYP\* (15% exchange):

IOp(3/174=1000000) IOp(3/175=1697750) IOp(3/176=1219250)

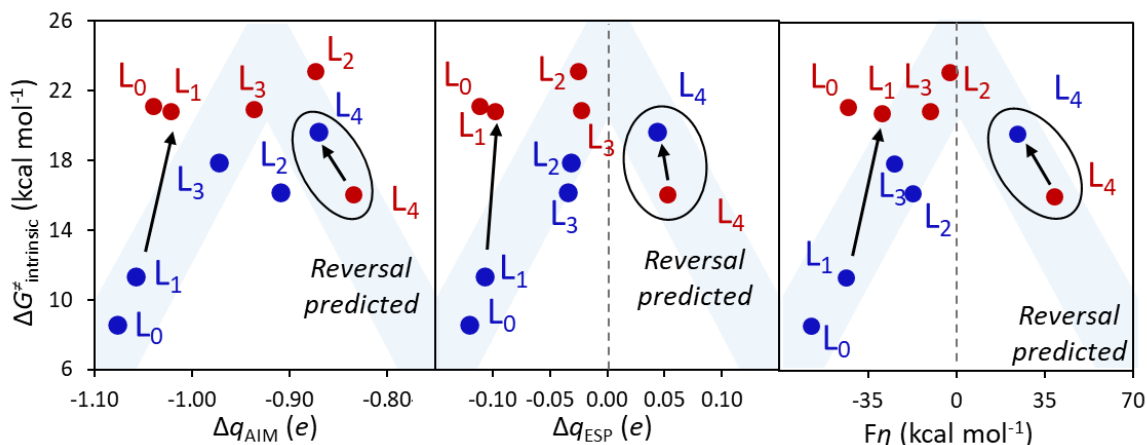

**Figure S7.** Quantification of PM predicts the substrate selectivity reversal observed through explicit transition state calculations from CHD and fluorene by oxidants  $L_0$ - $L_4$  in **Figure 9**, if spin crossover is not allowed in the HAA reaction from fluorene by  $L_2$ - $L_4$ . All energetics is condensed in **Table S9**.

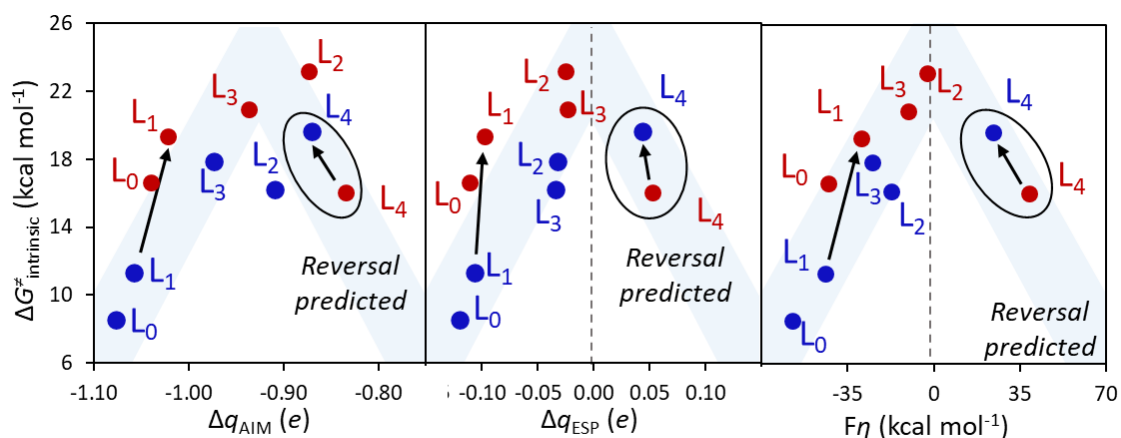

**Figure S8.** Subtraction of the singlet  $\rightarrow$  triplet spin crossover penalty from the HAA reactions between  $L_0$ - $L_1$  and CHD partly corrects their outlying behavior shown in **Figure 9**. Energetics is condensed in **Table S9**.

**Table S9.** HAA barriers for reactions between all oxidants  $L_0Co^{III}O - L_4Co^{III}O$  and substrates CHD and fluorene, in the singlet, triplet and quintet spin states. All energies were calculated at the B3LYP\*(D3)/def2-SVP//def2-TZVP level of theory at 298 K, with CPCM solvation in THF. All values are given in kcal mol<sup>-1</sup>. The ground spin state is shown as bold text in each case.

| Oxidant        | Substrate | $\Delta G_{DFT}^\ddagger (S = 0)$ | $\Delta G_{DFT}^\ddagger (S = 1)$ | $\Delta G_{DFT}^\ddagger (S = 2)$ |
|----------------|-----------|-----------------------------------|-----------------------------------|-----------------------------------|
| $L_0Co^{III}O$ | CHD       | 16.1                              | <b>14.0</b>                       | 15.4                              |
|                | Fluorene  | <b>6.1</b>                        | 6.9                               | 16.1                              |
| $L_1Co^{III}O$ | CHD       | 16.3                              | <b>14.0</b>                       | 15.3                              |
|                | Fluorene  | <b>7.4</b>                        | 10.6                              | 12.5                              |
| $L_2Co^{III}O$ | CHD       | 15.5                              | <b>12.1</b>                       | 12.9                              |
|                | Fluorene  | 11.1                              | <b>9.8</b>                        | 15.5                              |
| $L_3Co^{III}O$ | CHD       | 13.3                              | <b>12.1</b>                       | 13.5                              |
|                | Fluorene  | 12.7                              | <b>10.3</b>                       | 19.5                              |
| $L_4Co^{III}O$ | CHD       | 10.6                              | <b>7.9</b>                        | 16.0                              |
|                | Fluorene  | 15.2                              | <b>9.3</b>                        | 18.2                              |



### Half-reaction thermocycle for the $L_1Co^{III}O$ oxidant

For the oxidant  $L_1Co^{III}O$ , the one-electron reduced species was not reported in ref. 3 and, thus, the experimental half-reaction thermocycle reported is not complete (**Figure S4**). Thus, we applied DFT calculations to fill this gap. All species were optimized at the B3LYP\*(D3)/def2-SVP level with implicit CPCM solvation in MeCN. Final electronic potential energies were calculated with the B3LYP\*(D3)/def2-TZVP(CPCM) method, as described in the *Methods* section in the main text.

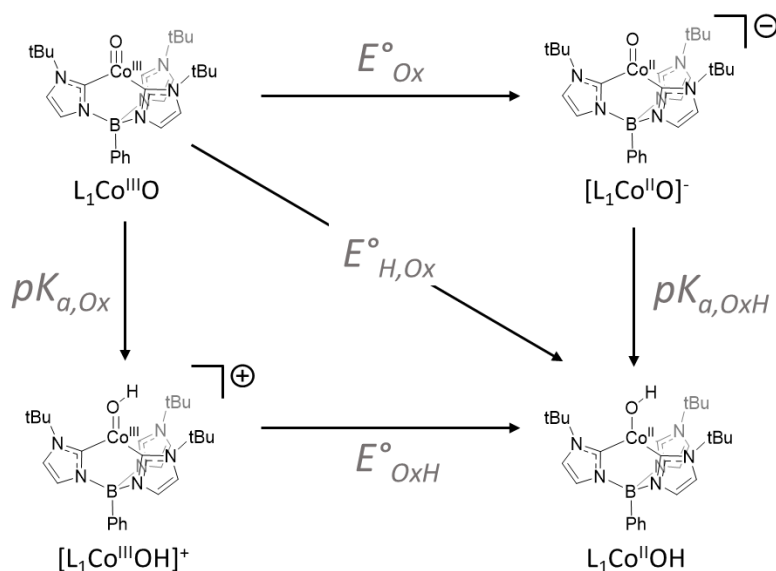

**Figure S9.** Half-reaction HAA thermocycle for the oxidant  $L_1Co^{III}O$ . Species  $L_1Co^{III}O$ ,  $[L_1Co^{III}OH]^+$  and  $L_1Co^{II}OH$  were experimentally characterized in reference 3. Species  $[L_1Co^{II}O]^-$  was not observed experimentally. All three possible spin states were calculated for all species. All values were computed at the B3LYP\*(D3)/def2-SVP//def2-TZVP level at 298K with implicit CPCM solvation in MeCN and are condensed in **Table S10**.

All species from **Figure S9** can exist in three spin states each. Systems  $L_1Co^{III}O$  and  $[L_1Co^{III}OH]^+$  may be singlets, triplets or quintets, while  $[L_1Co^{II}O]^-$  and  $L_1Co^{II}OH$  can be doublets, quartets or sextets. For all species, all three potentially accessible states were calculated. The Gibbs energy of the lowest-lying state for each species was employed in all cases to calculate

the thermodynamic descriptors from **Figure S4**. The results for these calculations and their comparison to experimental measurements are provided in **Table S10**.

**Table S10.** Comparison between experimental thermodynamic descriptors for oxidant  $\text{LiCo}^{\text{III}}\text{O}$ , and values calculated using the B3LYP\*(D3)/def2SVP//def2TZVP protocol with CPCM solvation in MeCN.

|                                | Experimental <sup>a,b</sup> | Calculated <sup>c</sup> |
|--------------------------------|-----------------------------|-------------------------|
| $E_{AH}^o$ (mV)                | -230                        | -482                    |
| $pK_{a,A}$                     | 25.6                        | 25.6                    |
| $E_A^o$ (mV)                   | N/A                         | -2325                   |
| $pK_{a,AH}$                    | N/A                         | 56.7                    |
| BDFE (kcal mol <sup>-1</sup> ) | 84.6                        | 80.3                    |

<sup>a</sup> Experimental acidity constants were measured in MeCN.

<sup>b</sup> Experimental reduction potentials were measured in MeCN. Reduction potentials are referenced to the  $\text{Cp}^+/\text{Cp}$  pair in MeCN (4.98 V). N. D. stands for *not determined*.

<sup>c</sup> The Gibbs free energy of solvation of the proton,  $G_{\text{H}^+}$ , employed for these calculations, was -260.2 kcal mol<sup>-1</sup>.<sup>4</sup>

Performance of B3LYP\* on the prediction of HAA barriers for the  $\text{LiCo}^{\text{III}}\text{O}$  oxidant

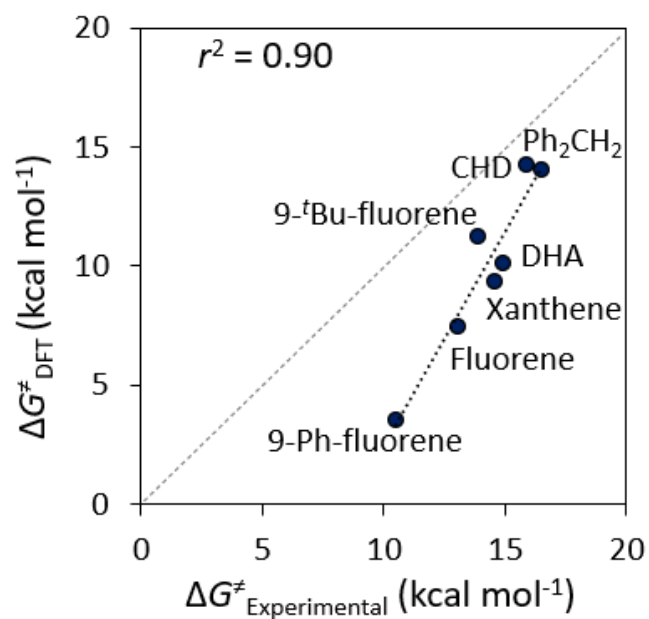

**Figure S10.** Correlation between HAA barriers calculated with the B3LYP\*(D3)/def2SVP//def2TZVP protocol with CPCM solvation in THF, and those obtained experimentally and reported in reference 3.

## Prediction of energetics and ground spin states by different density functionals

**Table S8.** Comparison between ground-state spin multiplicities determined experimentally for the species from **Figure S9**, and those obtained using different density functionals. The def2-SVP//def2-TZVP basis sets were used for geometry optimization and final potential energy calculation, respectively. The D3 dispersion correction and implicit CPCM solvation in MeCN was used in all cases.

|                                                    | Experiment <sup>a,b</sup> | B3LYP* | B3LYP | BP86 |
|----------------------------------------------------|---------------------------|--------|-------|------|
| L <sub>1</sub> Co <sup>III</sup> O                 | 0                         | 0      | 2     | 0    |
| [L <sub>1</sub> Co <sup>III</sup> OH] <sup>+</sup> | 0                         | 0      | 0     | 0    |
| [L <sub>1</sub> Co <sup>II</sup> O] <sup>-</sup>   | N/A                       | 3/2    | 3/2   | 1/2  |
| L <sub>1</sub> Co <sup>II</sup> OH                 | 3/2                       | 3/2    | 3/2   | 1/2  |
| BDFE                                               | 84.6                      | 80.3   | 87.4  | 65.6 |

<sup>a</sup> From Ref. 3.

<sup>b</sup> Experimental values were measured in MeCN. Reduction potentials are referenced to the Cp<sup>+</sup>/Cp pair in MeCN. N. D. stands for *not determined*.

## Cartesian coordinates for all species presented in this work

1. Thermodynamic cycle for the  $L_1Co^{III}O$  oxidant in all accessible spin states.

### $L_1Co^{III}O$ ( $S = 0$ )

74

```
o_u0.gjf.log      Energy: -1796417.0333958
C      -0.33044      1.47453      -0.42442
N      -0.73758      2.71032      -0.85930
C      0.34382      3.36661      -1.44236
C      1.41994      2.53686      -1.34473
N      1.00269      1.39614      -0.68981
B      1.77334      0.06688      -0.35685
N      1.41991      -0.26288      1.12845
C      0.12098      -0.33149      1.49069
N      0.10868      -0.61137      2.82945
C      1.42232      -0.71483      3.29045
C      2.23780      -0.49641      2.21795
N      1.00499      -0.99832      -1.21983
C      -0.32390      -1.19694      -1.00067
N      -0.72271      -2.15494      -1.89824
C      0.35735      -2.49742      -2.70820
C      1.42563      -1.76361      -2.28815
Co     -1.29627      -0.05876      0.19559
O      -2.94211      -0.02526      -0.06933
C      -2.12212      3.29613      -0.79123
C      -2.06629      4.79099      -1.14512
C      -3.01141      2.55904      -1.80481
C      -2.66113      3.15162      0.64084
C      -1.12423      -0.71514      3.67203
C      -0.74496      -1.10501      5.10670
C      -1.81781      0.65754      3.67479
C      -2.04634      -1.79229      3.07752
C      -2.08717      -2.77680      -2.02842
C      -2.53930      -3.26760      -0.64381
C      -3.05725      -1.73224      -2.60202
C      -2.01432      -3.98396      -2.97735
H      -3.07845      5.20929      -1.03033
H      -1.39231      5.34912      -0.47388
H      -2.59032      2.65105      -2.82096
H      -4.02039      3.00552      -1.80635
H      -3.09397      1.49785      -1.52277
H      -1.97143      3.61795      1.36462
H      -2.80006      2.09272      0.89415
H      -3.63883      3.65555      0.71590
H      -0.10593      -0.34587      5.58660
H      -0.23191      -2.08029      5.14309
H      -1.66686      -1.18745      5.70347
H      -1.15271      1.42770      4.10034
H      -2.73979      0.61638      4.27790
H      -1.51580      -2.75510      2.99090
H      -2.92468      -1.93168      3.72902
H      -2.40593      -1.49257      2.08135
H      -3.51978      -3.76416      -0.73166
H      -1.81561      -3.99255      -0.23379
```

|   |          |          |          |
|---|----------|----------|----------|
| H | -4.03742 | -2.20378 | -2.78795 |
| H | -3.18937 | -0.90966 | -1.88037 |
| H | -1.29108 | -4.74104 | -2.63102 |
| H | -1.76249 | -3.69116 | -4.00972 |
| H | -3.00810 | -4.45749 | -3.00626 |
| H | -1.75917 | 4.96505  | -2.18914 |
| H | -2.67480 | -1.34122 | -3.56081 |
| H | -2.08753 | 0.95642  | 2.65045  |
| C | 3.37982  | 0.10098  | -0.49947 |
| C | 4.12064  | 1.26269  | -0.19254 |
| C | 5.52103  | 1.26696  | -0.16346 |
| C | 6.23283  | 0.09065  | -0.42469 |
| C | 5.52618  | -1.08826 | -0.68814 |
| C | 4.12573  | -1.07800 | -0.71415 |
| H | 3.59867  | 2.18997  | 0.06136  |
| H | 6.05719  | 2.19212  | 0.07462  |
| H | 7.32788  | 0.08874  | -0.40536 |
| H | 6.06646  | -2.02473 | -0.86478 |
| H | 3.60802  | -2.02752 | -0.87877 |
| H | 0.27643  | 4.35867  | -1.87473 |
| H | 2.43666  | 2.67673  | -1.70083 |
| H | 1.67705  | -0.93410 | 4.32223  |
| H | 3.32316  | -0.49104 | 2.14744  |
| H | 0.29473  | -3.22543 | -3.50929 |
| H | 2.43880  | -1.72894 | -2.67852 |
| H | -2.64128 | -2.42342 | 0.04976  |

#### $L_1\text{Co}^{\text{III}}\text{O}$ ( $S = 1$ )

74

| o_u2.gjf.log | Energy: -1796413.7952023 |          |          |
|--------------|--------------------------|----------|----------|
| C            | -0.32780                 | 1.64865  | -0.22835 |
| N            | -0.67481                 | 2.88650  | -0.67561 |
| C            | 0.39761                  | 3.45651  | -1.35738 |
| C            | 1.42125                  | 2.55654  | -1.30337 |
| N            | 0.97860                  | 1.46332  | -0.57906 |
| B            | 1.71329                  | 0.08617  | -0.31966 |
| N            | 1.37663                  | -0.32465 | 1.15228  |
| C            | 0.09001                  | -0.43423 | 1.54607  |
| N            | 0.09929                  | -0.81156 | 2.85206  |
| C            | 1.42329                  | -0.93961 | 3.27985  |
| C            | 2.21561                  | -0.63260 | 2.21170  |
| N            | 0.96032                  | -0.94584 | -1.25490 |
| C            | -0.35135                 | -1.26532 | -1.05058 |
| N            | -0.71464                 | -2.08075 | -2.07791 |
| C            | 0.35413                  | -2.22911 | -2.95866 |
| C            | 1.39121                  | -1.50777 | -2.44417 |
| Co           | -1.27529                 | -0.05191 | 0.23814  |
| O            | -2.91110                 | 0.03438  | -0.01559 |
| C            | -2.03110                 | 3.50953  | -0.54079 |
| C            | -1.91889                 | 5.02682  | -0.75070 |
| C            | -2.94807                 | 2.88741  | -1.60692 |
| C            | -2.57128                 | 3.22875  | 0.86987  |
| C            | -1.13438                 | -1.08141 | 3.65334  |
| C            | -0.75045                 | -1.43410 | 5.09517  |
| C            | -2.00954                 | 0.18291  | 3.64432  |
| C            | -1.87617                 | -2.26267 | 3.00516  |

|   |          |          |          |
|---|----------|----------|----------|
| C | -2.08464 | -2.64826 | -2.29409 |
| C | -2.64960 | -3.12352 | -0.94660 |
| C | -2.96656 | -1.53877 | -2.89084 |
| C | -1.99654 | -3.84052 | -3.25833 |
| H | -2.90504 | 5.48175  | -0.56751 |
| H | -1.19703 | 5.48044  | -0.05083 |
| H | -2.54080 | 3.06322  | -2.61752 |
| H | -3.95103 | 3.34392  | -1.55308 |
| H | -3.03932 | 1.80515  | -1.42336 |
| H | -1.86462 | 3.58518  | 1.63820  |
| H | -2.74781 | 2.15246  | 1.00375  |
| H | -3.52962 | 3.75739  | 1.00336  |
| H | -0.20741 | -0.60957 | 5.58592  |
| H | -0.13528 | -2.34749 | 5.14505  |
| H | -1.67093 | -1.62031 | 5.67038  |
| H | -1.45247 | 1.04500  | 4.04739  |
| H | -2.90654 | 0.02172  | 4.26433  |
| H | -1.24250 | -3.16539 | 3.00345  |
| H | -2.80055 | -2.48241 | 3.56407  |
| H | -2.14920 | -2.02720 | 1.96451  |
| H | -3.61555 | -3.62729 | -1.11642 |
| H | -1.96228 | -3.83816 | -0.46343 |
| H | -3.98182 | -1.92613 | -3.08153 |
| H | -3.03285 | -0.70268 | -2.17671 |
| H | -1.29703 | -4.60907 | -2.88855 |
| H | -1.68937 | -3.53839 | -4.27278 |
| H | -2.99431 | -4.29882 | -3.34431 |
| H | -1.62724 | 5.28728  | -1.78118 |
| H | -2.54581 | -1.18216 | -3.84681 |
| H | -2.34100 | 0.42440  | 2.62229  |
| C | 3.32043  | 0.11488  | -0.47015 |
| C | 4.07270  | 1.25346  | -0.11075 |
| C | 5.47317  | 1.24189  | -0.08729 |
| C | 6.17145  | 0.07245  | -0.40959 |
| C | 5.45228  | -1.08431 | -0.73186 |
| C | 4.05200  | -1.05871 | -0.75153 |
| H | 3.55843  | 2.17324  | 0.18455  |
| H | 6.02035  | 2.14860  | 0.19299  |
| H | 7.26649  | 0.05847  | -0.39460 |
| H | 5.98296  | -2.01499 | -0.96061 |
| H | 3.52088  | -1.99050 | -0.96929 |
| H | 0.36201  | 4.44166  | -1.81176 |
| H | 2.42136  | 2.61906  | -1.72454 |
| H | 1.69740  | -1.23038 | 4.28902  |
| H | 3.29922  | -0.60835 | 2.12371  |
| H | 0.30638  | -2.83123 | -3.86057 |
| H | 2.39353  | -1.35872 | -2.83742 |
| H | -2.81893 | -2.26595 | -0.28012 |

**LiCo<sup>III</sup>O (S = 2)**

74

o\_u4.gjf.log Energy: -1796410.6945776

|   |          |         |         |
|---|----------|---------|---------|
| C | -0.41903 | 0.86763 | 1.42942 |
| N | -0.81986 | 1.73937 | 2.39061 |
| C | 0.21652  | 2.61116 | 2.70091 |

|    |          |          |          |
|----|----------|----------|----------|
| C  | 1.27397  | 2.25230  | 1.91184  |
| N  | 0.88084  | 1.16247  | 1.15457  |
| B  | 1.64637  | 0.45219  | -0.04116 |
| N  | 1.42875  | -1.10489 | 0.09015  |
| C  | 0.20760  | -1.70326 | 0.14810  |
| N  | 0.43437  | -3.03656 | 0.25727  |
| C  | 1.80551  | -3.28595 | 0.26876  |
| C  | 2.42174  | -2.07406 | 0.16371  |
| N  | 0.87256  | 0.95380  | -1.33427 |
| C  | -0.42507 | 0.60862  | -1.55359 |
| N  | -0.83269 | 1.30294  | -2.64723 |
| C  | 0.19737  | 2.11679  | -3.10166 |
| C  | 1.25747  | 1.90363  | -2.26437 |
| Co | -1.36354 | -0.36430 | 0.03465  |
| O  | -2.91401 | -1.03305 | 0.11083  |
| C  | -2.20591 | 1.76037  | 2.95769  |
| C  | -2.26526 | 2.73945  | 4.13667  |
| C  | -3.17450 | 2.20951  | 1.84972  |
| C  | -2.55866 | 0.34208  | 3.43668  |
| C  | -0.65791 | -4.05613 | 0.35334  |
| C  | -0.04907 | -5.45962 | 0.46060  |
| C  | -1.49425 | -3.74882 | 1.60722  |
| C  | -1.52585 | -3.95613 | -0.91286 |
| C  | -2.20930 | 1.18842  | -3.22644 |
| C  | -2.48311 | -0.29532 | -3.52489 |
| C  | -3.22161 | 1.72196  | -2.19749 |
| C  | -2.29415 | 2.00808  | -4.51956 |
| H  | -3.27756 | 2.71218  | 4.56938  |
| H  | -1.55032 | 2.46406  | 4.92981  |
| H  | -2.87914 | 3.19282  | 1.44660  |
| H  | -4.19726 | 2.28914  | 2.25405  |
| H  | -3.18641 | 1.47472  | 1.02985  |
| H  | -1.82642 | -0.00961 | 4.18285  |
| H  | -2.57693 | -0.36161 | 2.58989  |
| H  | -3.55794 | 0.34810  | 3.90285  |
| H  | 0.57648  | -5.56900 | 1.36215  |
| H  | 0.55502  | -5.71467 | -0.42606 |
| H  | -0.86677 | -6.19415 | 0.53046  |
| H  | -0.86008 | -3.76631 | 2.51003  |
| H  | -2.28640 | -4.50771 | 1.72252  |
| H  | -0.91156 | -4.10764 | -1.81684 |
| H  | -2.30908 | -4.73250 | -0.88939 |
| H  | -2.01384 | -2.97030 | -0.96025 |
| H  | -3.48495 | -0.40593 | -3.97194 |
| H  | -1.73709 | -0.69450 | -4.23257 |
| H  | -4.23094 | 1.73763  | -2.64125 |
| H  | -3.24984 | 1.06892  | -1.31113 |
| H  | -1.56133 | 1.66541  | -5.26885 |
| H  | -2.14036 | 3.08424  | -4.33520 |
| H  | -3.29968 | 1.88511  | -4.95143 |
| H  | -2.06731 | 3.77744  | 3.82218  |
| H  | -2.96008 | 2.74675  | -1.88482 |
| H  | -1.96915 | -2.76028 | 1.51081  |
| C  | 3.24192  | 0.71870  | -0.07018 |
| C  | 3.99132  | 0.83086  | 1.12043  |
| C  | 5.38963  | 0.91139  | 1.11519  |
| C  | 6.09141  | 0.86446  | -0.09491 |
| C  | 5.37894  | 0.71327  | -1.29008 |
| C  | 3.98068  | 0.63394  | -1.26968 |



|   |          |          |          |
|---|----------|----------|----------|
| H | 3.47864  | 0.82718  | 2.08727  |
| H | 5.93309  | 1.00117  | 2.06213  |
| H | 7.18473  | 0.92859  | -0.10506 |
| H | 5.91391  | 0.64646  | -2.24374 |
| H | 3.45950  | 0.47253  | -2.21832 |
| H | 0.13998  | 3.40159  | 3.44140  |
| H | 2.26133  | 2.70046  | 1.83796  |
| H | 2.23692  | -4.27893 | 0.34866  |
| H | 3.48133  | -1.83434 | 0.13641  |
| H | 0.11549  | 2.77137  | -3.96410 |
| H | 2.24123  | 2.36566  | -2.26785 |
| H | -2.44962 | -0.88774 | -2.59718 |

[LiCo<sup>III</sup>OH]<sup>+</sup> (S = 0)

75

p\_u0.gjf.log      Energy: -1796722.1420978

|    |          |          |          |
|----|----------|----------|----------|
| C  | -0.42067 | -1.18888 | -1.00803 |
| N  | -0.97339 | -2.28886 | -1.60167 |
| C  | 0.03601  | -3.22992 | -1.79598 |
| C  | 1.18963  | -2.70187 | -1.30085 |
| N  | 0.89561  | -1.43961 | -0.82700 |
| B  | 1.72585  | -0.49643 | 0.11835  |
| N  | 1.52051  | 0.95385  | -0.43726 |
| C  | 0.29441  | 1.49795  | -0.55677 |
| N  | 0.45495  | 2.81687  | -0.87463 |
| C  | 1.82281  | 3.06773  | -0.98967 |
| C  | 2.47921  | 1.90682  | -0.71387 |
| N  | 0.88576  | -0.54555 | 1.45575  |
| C  | -0.41554 | -0.15427 | 1.41101  |
| N  | -0.94113 | -0.40594 | 2.64146  |
| C  | 0.03049  | -0.99185 | 3.44679  |
| C  | 1.16552  | -1.08637 | 2.69418  |
| Co | -1.18997 | 0.38356  | -0.30123 |
| O  | -2.13332 | 0.89459  | -1.74904 |
| C  | -2.41178 | -2.54931 | -1.98056 |
| C  | -2.63561 | -4.06802 | -2.08501 |
| C  | -3.33776 | -2.00102 | -0.88635 |
| C  | -2.69869 | -1.89148 | -3.33856 |
| C  | -0.57769 | 3.90444  | -1.05123 |
| C  | 0.05838  | 5.25409  | -0.67000 |
| C  | -1.02100 | 3.93336  | -2.52168 |
| C  | -1.77309 | 3.65247  | -0.12140 |
| C  | -2.33760 | -0.16303 | 3.11698  |
| C  | -3.13582 | 0.59862  | 2.05733  |
| C  | -2.99675 | -1.52613 | 3.38861  |
| C  | -2.27298 | 0.68456  | 4.39971  |
| H  | -3.70698 | -4.24780 | -2.26248 |
| H  | -2.09046 | -4.51722 | -2.92989 |
| H  | -3.05156 | -2.39267 | 0.10315  |
| H  | -4.37385 | -2.31161 | -1.09292 |
| H  | -3.33345 | -0.90201 | -0.87507 |
| H  | -1.98847 | -2.25018 | -4.10180 |
| H  | -2.62976 | -0.79894 | -3.25655 |
| H  | -3.71896 | -2.15067 | -3.66588 |
| H  | 0.84205  | 5.56999  | -1.37601 |
| H  | 0.48167  | 5.22663  | 0.34751  |

|   |          |          |          |
|---|----------|----------|----------|
| H | -0.72491 | 6.02710  | -0.69595 |
| H | -0.15518 | 4.07316  | -3.18988 |
| H | -1.71991 | 4.77090  | -2.68107 |
| H | -1.43587 | 3.43180  | 0.90506  |
| H | -2.40183 | 4.55587  | -0.08773 |
| H | -2.39737 | 2.83390  | -0.50075 |
| H | -4.15579 | 0.77502  | 2.43293  |
| H | -2.69113 | 1.58225  | 1.83985  |
| H | -4.03186 | -1.37892 | 3.73631  |
| H | -3.02056 | -2.13490 | 2.47000  |
| H | -1.75562 | 1.63902  | 4.20754  |
| H | -1.74931 | 0.16084  | 5.21481  |
| H | -3.29478 | 0.90463  | 4.74769  |
| H | -2.35130 | -4.58678 | -1.15488 |
| H | -2.45436 | -2.09056 | 4.16387  |
| H | -1.53718 | 2.99935  | -2.78366 |
| C | 3.29749  | -0.80106 | 0.22199  |
| C | 4.02380  | -1.24107 | -0.90557 |
| C | 5.41643  | -1.38311 | -0.87968 |
| C | 6.13184  | -1.06966 | 0.28182  |
| C | 5.44245  | -0.59224 | 1.40217  |
| C | 4.04928  | -0.45380 | 1.36392  |
| H | 3.50079  | -1.45446 | -1.84315 |
| H | 5.94481  | -1.73102 | -1.77364 |
| H | 7.22090  | -1.18066 | 0.30778  |
| H | 5.99172  | -0.31599 | 2.30846  |
| H | 3.54934  | -0.03382 | 2.24162  |
| H | -0.13703 | -4.19188 | -2.26520 |
| H | 2.18254  | -3.13767 | -1.23672 |
| H | 2.21989  | 4.04271  | -1.24980 |
| H | 3.54323  | 1.68693  | -0.68161 |
| H | -0.15543 | -1.28880 | 4.47565  |
| H | 2.13417  | -1.50533 | 2.95249  |
| H | -3.24784 | 0.01767  | 1.12729  |
| H | -1.64226 | 0.90853  | -2.58637 |

**[L<sub>1</sub>Co<sup>III</sup>OH]<sup>+</sup> (S = 1)**

75

p\_u2.gjf.log      Energy: -1796712.8427903

|    |          |          |          |
|----|----------|----------|----------|
| C  | -0.60916 | -1.36657 | -0.86965 |
| N  | -1.18716 | -2.47196 | -1.40180 |
| C  | -0.23602 | -3.47925 | -1.49727 |
| C  | 0.93234  | -2.97174 | -1.00116 |
| N  | 0.69413  | -1.66208 | -0.63302 |
| B  | 1.60038  | -0.66081 | 0.19958  |
| N  | 1.58206  | 0.76024  | -0.49194 |
| C  | 0.46941  | 1.52437  | -0.58987 |
| N  | 0.84809  | 2.74861  | -1.03729 |
| C  | 2.22474  | 2.73414  | -1.26279 |
| C  | 2.67585  | 1.49601  | -0.91650 |
| N  | 0.75155  | -0.47463 | 1.51935  |
| C  | -0.49023 | 0.05631  | 1.41381  |
| N  | -1.08801 | -0.06674 | 2.62771  |
| C  | -0.21746 | -0.71585 | 3.49554  |
| C  | 0.92165  | -0.98445 | 2.79001  |
| Co | -1.17120 | 0.50354  | -0.36977 |

|   |          |          |          |
|---|----------|----------|----------|
| O | -1.95221 | 0.99930  | -1.90097 |
| C | -2.60338 | -2.58174 | -1.88905 |
| C | -3.01924 | -4.06017 | -1.89900 |
| C | -3.52920 | -1.80364 | -0.94222 |
| C | -2.66144 | -1.99292 | -3.30787 |
| C | -0.00179 | 3.96979  | -1.25262 |
| C | 0.79008  | 5.20213  | -0.77816 |
| C | -0.31873 | 4.08692  | -2.75200 |
| C | -1.29260 | 3.86832  | -0.43138 |
| C | -2.46572 | 0.36007  | 3.02769  |
| C | -3.12242 | 1.14753  | 1.89204  |
| C | -3.28657 | -0.90397 | 3.33350  |
| C | -2.35202 | 1.26333  | 4.26752  |
| H | -4.08186 | -4.12622 | -2.17918 |
| H | -2.45298 | -4.64898 | -2.63792 |
| H | -3.37129 | -2.10648 | 0.10554  |
| H | -4.57758 | -2.01039 | -1.20910 |
| H | -3.38142 | -0.71868 | -1.04167 |
| H | -1.98214 | -2.53853 | -3.98401 |
| H | -2.37712 | -0.92964 | -3.28272 |
| H | -3.68673 | -2.07539 | -3.70497 |
| H | 1.67366  | 5.40436  | -1.40325 |
| H | 1.11601  | 5.08149  | 0.26798  |
| H | 0.14039  | 6.08915  | -0.83908 |
| H | 0.60523  | 4.11931  | -3.35217 |
| H | -0.88899 | 5.01022  | -2.94378 |
| H | -1.06940 | 3.68801  | 0.63293  |
| H | -1.84063 | 4.82001  | -0.51259 |
| H | -1.94761 | 3.07103  | -0.80814 |
| H | -4.12284 | 1.47808  | 2.21150  |
| H | -2.54299 | 2.04788  | 1.63340  |
| H | -4.31247 | -0.62212 | 3.61971  |
| H | -3.33796 | -1.55613 | 2.44611  |
| H | -1.72262 | 2.14221  | 4.05082  |
| H | -1.92272 | 0.72901  | 5.12961  |
| H | -3.35451 | 1.61480  | 4.55901  |
| H | -2.89606 | -4.52008 | -0.90445 |
| H | -2.84776 | -1.48061 | 4.16339  |
| H | -0.93029 | 3.23679  | -3.09377 |
| C | 3.13152  | -1.10790 | 0.39267  |
| C | 3.84986  | -1.72372 | -0.65489 |
| C | 5.22010  | -1.99408 | -0.55441 |
| C | 5.92242  | -1.63845 | 0.60285  |
| C | 5.24497  | -0.98983 | 1.64144  |
| C | 3.87490  | -0.72306 | 1.52812  |
| H | 3.34246  | -1.97510 | -1.59149 |
| H | 5.74211  | -2.47603 | -1.38783 |
| H | 6.99349  | -1.84983 | 0.68735  |
| H | 5.78676  | -0.67947 | 2.54119  |
| H | 3.38959  | -0.17199 | 2.33911  |
| H | -0.45057 | -4.46668 | -1.89359 |
| H | 1.89419  | -3.45892 | -0.86921 |
| H | 2.76985  | 3.59601  | -1.63561 |
| H | 3.68355  | 1.08906  | -0.92737 |
| H | -0.46765 | -0.92748 | 4.53188  |
| H | 1.82305  | -1.50511 | 3.10161  |
| H | -3.27824 | 0.52324  | 0.99514  |
| H | -1.35815 | 1.33525  | -2.59251 |

[L<sub>1</sub>Co<sup>III</sup>OH]<sup>+</sup> (S = 2)

75

p\_u4.gjf.log      Energy: -1796704.0961240

|    |          |          |          |
|----|----------|----------|----------|
| C  | -0.39555 | -1.27717 | -1.01840 |
| N  | -0.77831 | -2.39423 | -1.68416 |
| C  | 0.28524  | -3.28678 | -1.73402 |
| C  | 1.33362  | -2.68850 | -1.09579 |
| N  | 0.91274  | -1.43637 | -0.68379 |
| B  | 1.68913  | -0.38225 | 0.20596  |
| N  | 1.43548  | 1.05116  | -0.42953 |
| C  | 0.20372  | 1.56539  | -0.66177 |
| N  | 0.36928  | 2.80093  | -1.19944 |
| C  | 1.72266  | 3.06687  | -1.31008 |
| C  | 2.38549  | 1.96892  | -0.82304 |
| N  | 0.91590  | -0.42925 | 1.59038  |
| C  | -0.38781 | -0.06077 | 1.68973  |
| N  | -0.79658 | -0.34798 | 2.95098  |
| C  | 0.24636  | -0.94324 | 3.64247  |
| C  | 1.31012  | -1.00198 | 2.78285  |
| Co | -1.29188 | 0.35500  | -0.09832 |
| O  | -3.08421 | 0.49232  | -0.23269 |
| C  | -2.15028 | -2.63071 | -2.24939 |
| C  | -2.13956 | -3.90408 | -3.10501 |
| C  | -3.13418 | -2.79323 | -1.07976 |
| C  | -2.52609 | -1.42781 | -3.12968 |
| C  | -0.76132 | 3.68706  | -1.63627 |
| C  | -0.20296 | 5.02372  | -2.13751 |
| C  | -1.51023 | 2.97298  | -2.77318 |
| C  | -1.68580 | 3.93036  | -0.43234 |
| C  | -2.18888 | -0.12509 | 3.47101  |
| C  | -2.60814 | 1.31608  | 3.14052  |
| C  | -3.12007 | -1.14353 | 2.79281  |
| C  | -2.20373 | -0.32956 | 4.99106  |
| H  | -3.13900 | -4.03607 | -3.54757 |
| H  | -1.41124 | -3.83687 | -3.92992 |
| H  | -2.81747 | -3.61641 | -0.41794 |
| H  | -4.13837 | -3.02715 | -1.46983 |
| H  | -3.20380 | -1.86399 | -0.49646 |
| H  | -1.78516 | -1.28473 | -3.93337 |
| H  | -2.58804 | -0.50543 | -2.53557 |
| H  | -3.51274 | -1.60098 | -3.58869 |
| H  | 0.45185  | 4.89345  | -3.01424 |
| H  | 0.35253  | 5.55530  | -1.34774 |
| H  | -1.04521 | 5.66283  | -2.44420 |
| H  | -0.83895 | 2.78412  | -3.62689 |
| H  | -2.35151 | 3.59545  | -3.11743 |
| H  | -1.12380 | 4.35708  | 0.41424  |
| H  | -2.48307 | 4.63566  | -0.71629 |
| H  | -2.16811 | 2.99910  | -0.09857 |
| H  | -3.60632 | 1.51143  | 3.56435  |
| H  | -1.89635 | 2.03902  | 3.57174  |
| H  | -4.14243 | -1.03346 | 3.18979  |
| H  | -3.15924 | -0.97923 | 1.70600  |
| H  | -1.49735 | 0.34678  | 5.49995  |
| H  | -1.97206 | -1.36971 | 5.27187  |
| H  | -3.21517 | -0.10689 | 5.36443  |

|   |          |          |          |
|---|----------|----------|----------|
| H | -1.92322 | -4.80343 | -2.50592 |
| H | -2.77886 | -2.17344 | 2.98959  |
| H | -1.91440 | 2.00572  | -2.43538 |
| C | 3.28309  | -0.58810 | 0.30211  |
| C | 4.03109  | -1.05271 | -0.80107 |
| C | 5.43065  | -1.09242 | -0.78366 |
| C | 6.13206  | -0.64661 | 0.34232  |
| C | 5.41912  | -0.13997 | 1.43465  |
| C | 4.01955  | -0.10522 | 1.40512  |
| H | 3.51878  | -1.36714 | -1.71534 |
| H | 5.97477  | -1.46416 | -1.65835 |
| H | 7.22645  | -0.67754 | 0.36139  |
| H | 5.95379  | 0.24012  | 2.31159  |
| H | 3.49882  | 0.33995  | 2.25825  |
| H | 0.22986  | -4.25980 | -2.21133 |
| H | 2.33378  | -3.06725 | -0.90504 |
| H | 2.12151  | 3.99185  | -1.71498 |
| H | 3.45292  | 1.78559  | -0.73121 |
| H | 0.17112  | -1.27204 | 4.67423  |
| H | 2.30371  | -1.41210 | 2.94138  |
| H | -2.67034 | 1.47647  | 2.05454  |
| H | -3.53555 | 1.06786  | -0.87298 |

[LiCo<sup>II</sup>O]<sup>-</sup> (S=1/2)

74

|              |          |                  |          |
|--------------|----------|------------------|----------|
| r_u1.gjf.log | Energy:  | -1796468.1948829 |          |
| C            | -0.40935 | -1.34242         | -0.90358 |
| N            | -0.78929 | -2.47858         | -1.57953 |
| C            | 0.30636  | -3.32059         | -1.76796 |
| C            | 1.38072  | -2.69234         | -1.21071 |
| N            | 0.94197  | -1.47744         | -0.71199 |
| B            | 1.69842  | -0.40724         | 0.16656  |
| N            | 1.41333  | 1.01734          | -0.43577 |
| C            | 0.14008  | 1.51592          | -0.53202 |
| N            | 0.28551  | 2.78001          | -1.05706 |
| C            | 1.63467  | 3.04451          | -1.30451 |
| C            | 2.33057  | 1.94082          | -0.91112 |
| N            | 0.93839  | -0.46774         | 1.53377  |
| C            | -0.39380 | -0.15091         | 1.50513  |
| N            | -0.84565 | -0.37278         | 2.79020  |
| C            | 0.19015  | -0.87139         | 3.58295  |
| C            | 1.29488  | -0.94179         | 2.78570  |
| Co           | -1.29660 | 0.29032          | -0.15937 |
| O            | -2.66553 | 0.69639          | -1.14698 |
| C            | -2.17201 | -2.74843         | -2.07780 |
| C            | -2.24621 | -4.15917         | -2.67950 |
| C            | -3.15838 | -2.63626         | -0.90408 |
| C            | -2.50999 | -1.69381         | -3.14526 |
| C            | -0.83726 | 3.71094          | -1.37938 |
| C            | -0.28302 | 5.11772          | -1.65136 |
| C            | -1.57311 | 3.17231          | -2.61798 |
| C            | -1.80588 | 3.76332          | -0.18605 |
| C            | -2.22336 | -0.05029         | 3.25489  |
| C            | -2.44080 | 1.46500          | 3.09228  |
| C            | -3.24048 | -0.82867         | 2.40383  |
| C            | -2.39035 | -0.43939         | 4.73013  |

|   |          |          |          |
|---|----------|----------|----------|
| H | -3.27877 | -4.34229 | -3.01746 |
| H | -1.58677 | -4.27241 | -3.55648 |
| H | -2.86805 | -3.31002 | -0.07916 |
| H | -4.17253 | -2.91197 | -1.24210 |
| H | -3.17134 | -1.59383 | -0.55017 |
| H | -1.76585 | -1.72138 | -3.96169 |
| H | -2.52933 | -0.69652 | -2.65828 |
| H | -3.50467 | -1.90472 | -3.57817 |
| H | 0.35096  | 5.14992  | -2.55330 |
| H | 0.29862  | 5.50282  | -0.79592 |
| H | -1.12887 | 5.80280  | -1.82254 |
| H | -0.87080 | 3.05750  | -3.46352 |
| H | -2.36566 | 3.88011  | -2.92217 |
| H | -1.27567 | 4.04206  | 0.74111  |
| H | -2.59053 | 4.51495  | -0.38140 |
| H | -2.27690 | 2.77389  | -0.06692 |
| H | -3.46613 | 1.74235  | 3.39050  |
| H | -1.72747 | 2.02749  | 3.71920  |
| H | -4.26282 | -0.64837 | 2.77768  |
| H | -3.18797 | -0.50025 | 1.35300  |
| H | -1.69420 | 0.11191  | 5.38395  |
| H | -2.24314 | -1.52130 | 4.88658  |
| H | -3.41516 | -0.19018 | 5.04891  |
| H | -1.99122 | -4.93838 | -1.94061 |
| H | -3.03483 | -1.91162 | 2.44326  |
| H | -2.03319 | 2.19840  | -2.34515 |
| C | 3.30992  | -0.59055 | 0.24363  |
| C | 4.06050  | -1.01230 | -0.87565 |
| C | 5.46119  | -1.04061 | -0.87101 |
| C | 6.16873  | -0.62666 | 0.26389  |
| C | 5.45591  | -0.16428 | 1.37621  |
| C | 4.05495  | -0.14135 | 1.35490  |
| H | 3.54177  | -1.30291 | -1.79439 |
| H | 6.00218  | -1.37850 | -1.76218 |
| H | 7.26400  | -0.64843 | 0.27490  |
| H | 5.99286  | 0.19091  | 2.26313  |
| H | 3.53331  | 0.26746  | 2.22530  |
| H | 0.25263  | -4.28293 | -2.26777 |
| H | 2.40843  | -3.03648 | -1.12651 |
| H | 1.99770  | 3.97744  | -1.72480 |
| H | 3.40151  | 1.75166  | -0.92988 |
| H | 0.07428  | -1.13695 | 4.62932  |
| H | 2.29090  | -1.30701 | 3.02435  |
| H | -2.28430 | 1.75331  | 2.04082  |

**[LiCo<sup>II</sup>O]<sup>-</sup> (S=3/2)**

74

r\_u3.gjf.log Energy: -1796473.7423302

|   |          |          |          |
|---|----------|----------|----------|
| C | -0.44468 | -0.85361 | -1.37585 |
| N | -0.87409 | -1.75477 | -2.31063 |
| C | 0.13433  | -2.67416 | -2.60068 |
| C | 1.21377  | -2.31105 | -1.84858 |
| N | 0.86590  | -1.17629 | -1.12919 |
| B | 1.64513  | -0.47733 | 0.05631  |
| N | 1.49664  | 1.08644  | -0.09964 |
| C | 0.27920  | 1.70756  | -0.16989 |

|    |          |          |          |
|----|----------|----------|----------|
| N  | 0.54739  | 3.03602  | -0.32680 |
| C  | 1.92691  | 3.25371  | -0.35708 |
| C  | 2.51234  | 2.02933  | -0.21361 |
| N  | 0.85330  | -0.93508 | 1.34713  |
| C  | -0.45614 | -0.56545 | 1.51420  |
| N  | -0.88566 | -1.22509 | 2.63183  |
| C  | 0.12569  | -2.04645 | 3.13070  |
| C  | 1.20364  | -1.86979 | 2.31163  |
| Co | -1.29539 | 0.45721  | -0.04529 |
| O  | -2.96298 | 0.96435  | -0.09575 |
| C  | -2.27874 | -1.80590 | -2.80943 |
| C  | -2.36420 | -2.74502 | -4.02047 |
| C  | -3.17266 | -2.31868 | -1.66674 |
| C  | -2.71990 | -0.38786 | -3.21181 |
| C  | -0.53109 | 4.05484  | -0.47702 |
| C  | 0.08768  | 5.45143  | -0.61121 |
| C  | -1.35048 | 3.70855  | -1.73373 |
| C  | -1.44283 | 3.99065  | 0.76163  |
| C  | -2.25503 | -1.04908 | 3.19838  |
| C  | -2.46591 | 0.44940  | 3.47876  |
| C  | -3.29178 | -1.52931 | 2.16712  |
| C  | -2.38670 | -1.85270 | 4.49833  |
| H  | -3.39347 | -2.72992 | -4.41325 |
| H  | -1.68541 | -2.42420 | -4.82920 |
| H  | -2.84222 | -3.31673 | -1.32922 |
| H  | -4.22099 | -2.39310 | -2.00425 |
| H  | -3.12024 | -1.60860 | -0.82591 |
| H  | -2.00955 | 0.05009  | -3.93445 |
| H  | -2.78610 | 0.25570  | -2.31596 |
| H  | -3.71531 | -0.43562 | -3.68718 |
| H  | 0.73248  | 5.53157  | -1.50283 |
| H  | 0.68032  | 5.72318  | 0.27893  |
| H  | -0.72088 | 6.19255  | -0.71561 |
| H  | -0.70079 | 3.67437  | -2.62576 |
| H  | -2.13031 | 4.47252  | -1.89799 |
| H  | -0.85455 | 4.12738  | 1.68581  |
| H  | -2.20125 | 4.79135  | 0.70899  |
| H  | -1.95881 | 3.01421  | 0.78598  |
| H  | -3.46465 | 0.61370  | 3.91895  |
| H  | -1.70502 | 0.82633  | 4.18432  |
| H  | -4.29967 | -1.51151 | 2.61808  |
| H  | -3.28344 | -0.85521 | 1.29036  |
| H  | -1.64871 | -1.53547 | 5.25472  |
| H  | -2.27183 | -2.93607 | 4.32428  |
| H  | -3.39145 | -1.68764 | 4.91916  |
| H  | -2.12853 | -3.78944 | -3.75563 |
| H  | -3.07283 | -2.56300 | 1.84752  |
| H  | -1.83806 | 2.72873  | -1.58931 |
| C  | 3.23810  | -0.79507 | 0.09695  |
| C  | 3.99012  | -0.96260 | -1.08547 |
| C  | 5.38594  | -1.08411 | -1.07325 |
| C  | 6.08601  | -1.02500 | 0.13759  |
| C  | 5.37297  | -0.82190 | 1.32511  |
| C  | 3.97735  | -0.70219 | 1.29575  |
| H  | 3.47826  | -0.97292 | -2.05283 |
| H  | 5.92971  | -1.21573 | -2.01560 |
| H  | 7.17724  | -1.12062 | 0.15396  |
| H  | 5.90642  | -0.74620 | 2.27944  |
| H  | 3.45507  | -0.50398 | 2.23691  |

|   |          |          |          |
|---|----------|----------|----------|
| H | 0.02579  | -3.48851 | -3.31146 |
| H | 2.19197  | -2.78132 | -1.78096 |
| H | 2.38403  | 4.23265  | -0.47104 |
| H | 3.56743  | 1.76724  | -0.18363 |
| H | 0.01791  | -2.67843 | 4.00765  |
| H | 2.18030  | -2.34644 | 2.35104  |
| H | -2.39965 | 1.00810  | 2.53059  |

[LiCo<sup>II</sup>O]<sup>-</sup> (S=5/2)

74

|              |          |                  |          |
|--------------|----------|------------------|----------|
| r_u5.gjf.log | Energy:  | -1796428.1311079 |          |
| C            | -0.40454 | -0.77683         | -1.47244 |
| N            | -0.80587 | -1.65418         | -2.44613 |
| C            | 0.25001  | -2.50008         | -2.77682 |
| C            | 1.30736  | -2.12630         | -1.99479 |
| N            | 0.90726  | -1.05594         | -1.21648 |
| B            | 1.68964  | -0.42822         | 0.02438  |
| N            | 1.40412  | 1.16528          | -0.04533 |
| C            | 0.18537  | 1.76117          | -0.08791 |
| N            | 0.40828  | 3.10266          | -0.14340 |
| C            | 1.78116  | 3.35312          | -0.13473 |
| C            | 2.39375  | 2.13311          | -0.07267 |
| N            | 0.88874  | -0.94998         | 1.30000  |
| C            | -0.42100 | -0.63344         | 1.51986  |
| N            | -0.83921 | -1.41119         | 2.56789  |
| C            | 0.20390  | -2.23423         | 2.98386  |
| C            | 1.26992  | -1.94939         | 2.17606  |
| Co           | -1.36130 | 0.38686          | -0.03212 |
| O            | -2.92610 | 1.04023          | -0.08656 |
| C            | -2.19751 | -1.71869         | -2.97335 |
| C            | -2.25225 | -2.66222         | -4.18234 |
| C            | -3.11972 | -2.24266         | -1.85726 |
| C            | -2.63327 | -0.30490         | -3.39858 |
| C            | -0.68741 | 4.11486          | -0.21330 |
| C            | -0.09115 | 5.52711          | -0.26097 |
| C            | -1.51044 | 3.84727          | -1.48568 |
| C            | -1.57331 | 3.95989          | 1.03548  |
| C            | -2.21529 | -1.34999         | 3.13580  |
| C            | -2.51224 | 0.10740          | 3.53340  |
| C            | -3.22167 | -1.81818         | 2.06794  |
| C            | -2.30878 | -2.25582         | 4.37045  |
| H            | -3.27580 | -2.66275         | -4.58958 |
| H            | -1.56754 | -2.33442         | -4.98241 |
| H            | -2.78206 | -3.23198         | -1.50437 |
| H            | -4.15446 | -2.33607         | -2.22811 |
| H            | -3.11866 | -1.54324         | -1.00737 |
| H            | -1.93456 | 0.10722          | -4.14624 |
| H            | -2.66757 | 0.36828          | -2.52766 |
| H            | -3.64088 | -0.34593         | -3.84597 |
| H            | 0.54499  | 5.67421          | -1.14978 |
| H            | 0.50216  | 5.75214          | 0.64109  |
| H            | -0.91349 | 6.25844          | -0.31276 |
| H            | -0.86817 | 3.90340          | -2.38137 |
| H            | -2.31073 | 4.60093          | -1.58174 |
| H            | -0.97208 | 4.07597          | 1.95358  |
| H            | -2.36119 | 4.73257          | 1.03428  |



|   |          |          |          |
|---|----------|----------|----------|
| H | -2.05403 | 2.96881  | 1.03246  |
| H | -3.52243 | 0.18007  | 3.97057  |
| H | -1.78055 | 0.46357  | 4.27839  |
| H | -4.23318 | -1.87773 | 2.50429  |
| H | -3.25219 | -1.10222 | 1.23159  |
| H | -1.58674 | -1.95882 | 5.14929  |
| H | -2.13990 | -3.31531 | 4.11527  |
| H | -3.32024 | -2.17278 | 4.79878  |
| H | -2.00443 | -3.70078 | -3.90724 |
| H | -2.94684 | -2.81415 | 1.68175  |
| H | -1.97232 | 2.84922  | -1.42696 |
| C | 3.23975  | -0.72437 | 0.04486  |
| C | 4.03602  | -0.72536 | -1.16646 |
| C | 5.42162  | -0.81072 | -1.16313 |
| C | 6.15926  | -0.86835 | 0.05607  |
| C | 5.41397  | -0.74987 | 1.26749  |
| C | 4.02834  | -0.66434 | 1.25762  |
| H | 3.53238  | -0.62919 | -2.13686 |
| H | 5.95903  | -0.81584 | -2.12211 |
| H | 7.25268  | -0.92862 | 0.06076  |
| H | 5.94543  | -0.70624 | 2.22871  |
| H | 3.52002  | -0.51788 | 2.21918  |
| H | 0.18448  | -3.28052 | -3.52931 |
| H | 2.31085  | -2.54058 | -1.93735 |
| H | 2.21076  | 4.34972  | -0.17209 |
| H | 3.44928  | 1.87191  | -0.04635 |
| H | 0.12456  | -2.94255 | 3.80334  |
| H | 2.26619  | -2.38422 | 2.16163  |
| H | -2.46626 | 0.76041  | 2.64780  |

[L<sub>1</sub>Co<sup>II</sup>OH] (S=1/2)

75

|              |          |                  |          |
|--------------|----------|------------------|----------|
| h_u1.gjf.log | Energy:  | -1796813.6612540 |          |
| Co           | 1.16585  | 0.46218          | -0.32087 |
| N            | 1.05104  | -0.23468         | 2.61700  |
| C            | 0.14748  | -0.87227         | 3.47013  |
| C            | -0.99171 | -1.07951         | 2.74956  |
| N            | -0.78719 | -0.55575         | 1.48365  |
| C            | 0.48435  | -0.07083         | 1.38363  |
| H            | 0.38115  | -1.11852         | 4.50306  |
| H            | -1.91648 | -1.56593         | 3.04862  |
| C            | 2.43158  | 0.14112          | 3.02263  |
| C            | 3.12438  | 0.90205          | 1.88644  |
| C            | 3.21734  | -1.14376         | 3.33938  |
| C            | 2.34996  | 1.05121          | 4.26140  |
| H            | 4.12958  | 1.21026          | 2.21643  |
| H            | 2.56346  | 1.80810          | 1.60956  |
| H            | 3.25420  | 0.26554          | 0.99609  |
| H            | 2.75591  | -1.70519         | 4.16813  |
| H            | 4.25140  | -0.89538         | 3.62990  |
| H            | 3.25160  | -1.79984         | 2.45379  |
| H            | 1.76066  | 1.95574          | 4.03585  |
| H            | 3.36268  | 1.36125          | 4.56669  |
| H            | 1.88411  | 0.53800          | 5.11808  |
| B            | -1.62712 | -0.61160         | 0.15361  |
| N            | 1.09646  | -2.41610         | -1.53945 |

|   |          |          |          |
|---|----------|----------|----------|
| C | 0.10535  | -3.38383 | -1.70673 |
| C | -1.04549 | -2.85800 | -1.20037 |
| N | -0.76121 | -1.57781 | -0.75472 |
| C | 0.56333  | -1.30330 | -0.95055 |
| H | 0.28449  | -4.35534 | -2.15637 |
| H | -2.02801 | -3.31357 | -1.11312 |
| C | 2.52075  | -2.58952 | -1.96280 |
| C | 2.71338  | -1.91397 | -3.33121 |
| C | 2.84544  | -4.08894 | -2.06378 |
| C | 3.44859  | -1.94446 | -0.92167 |
| H | 3.73781  | -2.09175 | -3.70063 |
| H | 2.56218  | -0.82936 | -3.22497 |
| H | 2.00247  | -2.32058 | -4.07051 |
| H | 2.63439  | -4.61194 | -1.11597 |
| H | 3.91706  | -4.20637 | -2.28931 |
| H | 2.28726  | -4.58479 | -2.87435 |
| H | 3.33665  | -0.85109 | -0.93822 |
| H | 4.49640  | -2.18361 | -1.16717 |
| H | 3.23011  | -2.32328 | 0.09020  |
| N | -0.76119 | 2.81486  | -0.92607 |
| C | -2.14193 | 2.87877  | -1.12969 |
| C | -2.64303 | 1.65005  | -0.81957 |
| N | -1.57702 | 0.84984  | -0.44007 |
| C | -0.41360 | 1.55557  | -0.52651 |
| H | -2.65447 | 3.77614  | -1.46290 |
| H | -3.67007 | 1.29330  | -0.83098 |
| C | 0.16918  | 3.96536  | -1.13842 |
| C | 1.35424  | 3.85554  | -0.16709 |
| C | -0.58294 | 5.27931  | -0.86519 |
| C | 0.67426  | 3.93275  | -2.59099 |
| H | 1.97921  | 4.75951  | -0.25552 |
| H | 1.97393  | 2.98358  | -0.41785 |
| H | 1.00523  | 3.77089  | 0.87537  |
| H | -1.37133 | 5.47458  | -1.60987 |
| H | 0.12906  | 6.11810  | -0.92004 |
| H | -1.03854 | 5.27753  | 0.13925  |
| H | 1.27913  | 3.02606  | -2.74229 |
| H | 1.30276  | 4.81659  | -2.79431 |
| H | -0.17199 | 3.93986  | -3.29902 |
| C | -3.91357 | -1.53484 | -0.78983 |
| H | -3.40296 | -1.73096 | -1.73792 |
| C | -5.29298 | -1.76808 | -0.72231 |
| H | -5.82136 | -2.16710 | -1.59519 |
| C | -5.99685 | -1.48081 | 0.45319  |
| H | -7.07516 | -1.66332 | 0.51306  |
| C | -5.30780 | -0.93694 | 1.54312  |
| H | -5.84796 | -0.67924 | 2.46083  |
| C | -3.92813 | -0.70752 | 1.45999  |
| H | -3.43251 | -0.23776 | 2.31453  |
| C | -3.18246 | -1.02553 | 0.30544  |
| O | 2.13451  | 1.02879  | -1.81971 |
| H | 1.60149  | 0.93113  | -2.62330 |

[LiCo<sup>II</sup>OH] (S=3/2)

75

h\_u3.gjf.log Energy: -1796820.1033728

|    |          |          |          |
|----|----------|----------|----------|
| C  | 0.43989  | -0.74389 | 1.45798  |
| N  | 0.86833  | -1.53577 | 2.47678  |
| C  | -0.14757 | -2.40466 | 2.86599  |
| C  | -1.22205 | -2.12262 | 2.07163  |
| N  | -0.86271 | -1.07991 | 1.23138  |
| B  | -1.65315 | -0.48596 | -0.01096 |
| N  | -1.49852 | 1.09133  | -0.00032 |
| C  | -0.29623 | 1.73014  | 0.00015  |
| N  | -0.56421 | 3.06084  | 0.00591  |
| C  | -1.94242 | 3.26947  | 0.00974  |
| C  | -2.52016 | 2.03271  | 0.00478  |
| N  | -0.85996 | -1.05617 | -1.25862 |
| C  | 0.44575  | -0.71914 | -1.47298 |
| N  | 0.87207  | -1.48960 | -2.50915 |
| C  | -0.14597 | -2.34580 | -2.92028 |
| C  | -1.22171 | -2.07752 | -2.12374 |
| Co | 1.26504  | 0.45227  | 0.00916  |
| O  | 3.08409  | 0.94153  | -0.11155 |
| C  | 2.25279  | -1.47086 | 3.03910  |
| C  | 2.36269  | -2.40190 | 4.25281  |
| C  | 3.25014  | -1.90051 | 1.94931  |
| C  | 2.53327  | -0.02040 | 3.46711  |
| C  | 0.50782  | 4.10184  | 0.03409  |
| C  | -0.12278 | 5.49838  | -0.01500 |
| C  | 1.30798  | 3.93051  | 1.33691  |
| C  | 1.42726  | 3.89436  | -1.18230 |
| C  | 2.26624  | -1.44499 | -3.04838 |
| C  | 2.61710  | 0.01566  | -3.37885 |
| C  | 3.21651  | -1.99266 | -1.97050 |
| C  | 2.35810  | -2.30130 | -4.31779 |
| H  | 3.37452  | -2.31316 | 4.67858  |
| H  | 1.63989  | -2.13306 | 5.04110  |
| H  | 2.98291  | -2.89058 | 1.54324  |
| H  | 4.26561  | -1.96113 | 2.37598  |
| H  | 3.26545  | -1.16243 | 1.13174  |
| H  | 1.79463  | 0.32006  | 4.21197  |
| H  | 2.49132  | 0.64824  | 2.59375  |
| H  | 3.54022  | 0.05192  | 3.91042  |
| H  | -0.77509 | 5.68564  | 0.85402  |
| H  | -0.70752 | 5.64804  | -0.93783 |
| H  | 0.67966  | 6.25265  | 0.00091  |
| H  | 0.65204  | 4.03420  | 2.21751  |
| H  | 2.10298  | 4.69211  | 1.39785  |
| H  | 0.84414  | 3.91586  | -2.11836 |
| H  | 2.17949  | 4.70019  | -1.22126 |
| H  | 1.95683  | 2.93080  | -1.10650 |
| H  | 3.62047  | 0.05960  | -3.83490 |
| H  | 1.89033  | 0.43690  | -4.09402 |
| H  | 4.25015  | -2.01496 | -2.35502 |
| H  | 3.19360  | -1.34575 | -1.08117 |
| H  | 1.65607  | -1.95443 | -5.09447 |
| H  | 2.16391  | -3.36708 | -4.11275 |
| H  | 3.37854  | -2.22384 | -4.72495 |
| H  | 2.21049  | -3.45790 | 3.97461  |
| H  | 2.92892  | -3.01809 | -1.68212 |
| H  | 1.77719  | 2.93451  | 1.36237  |
| C  | -3.24116 | -0.80203 | -0.01245 |
| C  | -3.98377 | -0.84664 | 1.18692  |
| C  | -5.37935 | -0.96656 | 1.19563  |

|   |          |          |          |
|---|----------|----------|----------|
| C | -6.08661 | -1.02882 | -0.01058 |
| C | -5.38250 | -0.94601 | -1.21742 |
| C | -3.98692 | -0.82607 | -1.21044 |
| H | -3.46789 | -0.75736 | 2.14789  |
| H | -5.91669 | -1.00140 | 2.14973  |
| H | -7.17770 | -1.12437 | -0.00996 |
| H | -5.92238 | -0.96457 | -2.17054 |
| H | -3.47362 | -0.71998 | -2.17104 |
| H | -0.04533 | -3.13816 | 3.65998  |
| H | -2.20133 | -2.59336 | 2.04771  |
| H | -2.40420 | 4.25225  | 0.01374  |
| H | -3.57228 | 1.75990  | 0.00327  |
| H | -0.04383 | -3.06069 | -3.73106 |
| H | -2.20335 | -2.54367 | -2.11405 |
| H | 2.62906  | 0.62909  | -2.46518 |
| H | 3.41201  | 1.53483  | 0.58101  |

[L<sub>1</sub>Co<sup>II</sup>OH] (S=5/2)

75

| h_u5.gjf.log | Energy: -1796739.7126202 |          |          |
|--------------|--------------------------|----------|----------|
| C            | 0.36120                  | -0.87529 | 1.38962  |
| N            | 0.79314                  | -1.93162 | 2.16174  |
| C            | -0.22357                 | -2.87279 | 2.27154  |
| C            | -1.29373                 | -2.38778 | 1.57702  |
| N            | -0.94956                 | -1.14561 | 1.06362  |
| B            | -1.69596                 | -0.37892 | -0.09594 |
| N            | -1.50874                 | 1.18241  | 0.16037  |
| C            | -0.29608                 | 1.77827  | 0.25193  |
| N            | -0.51457                 | 3.11487  | 0.36096  |
| C            | -1.88295                 | 3.36299  | 0.34096  |
| C            | -2.49680                 | 2.14765  | 0.20779  |
| N            | -0.91107                 | -0.72432 | -1.39015 |
| C            | 0.42838                  | -0.26976 | -1.58845 |
| N            | 0.95477                  | -1.08526 | -2.63560 |
| C            | 0.04222                  | -2.08643 | -2.90464 |
| C            | -1.07878                 | -1.86652 | -2.14565 |
| Co           | 1.24745                  | 0.44657  | 0.08747  |
| O            | 3.00077                  | 0.93353  | 0.33465  |
| C            | 2.14321                  | -2.01516 | 2.78581  |
| C            | 2.17833                  | -3.16981 | 3.79659  |
| C            | 3.19574                  | -2.25237 | 1.68815  |
| C            | 2.42873                  | -0.68902 | 3.51267  |
| C            | 0.57984                  | 4.12380  | 0.50896  |
| C            | -0.01605                 | 5.53632  | 0.53478  |
| C            | 1.31341                  | 3.84158  | 1.83081  |
| C            | 1.53991                  | 3.98467  | -0.68499 |
| C            | 2.35809                  | -1.04872 | -3.08750 |
| C            | 2.81495                  | 0.41905  | -3.16586 |
| C            | 3.23739                  | -1.82113 | -2.08302 |
| C            | 2.46753                  | -1.68850 | -4.48113 |
| H            | 3.16268                  | -3.18090 | 4.29064  |
| H            | 1.40785                  | -3.05156 | 4.57659  |
| H            | 2.93721                  | -3.13801 | 1.08410  |
| H            | 4.18570                  | -2.41835 | 2.14553  |
| H            | 3.26794                  | -1.37383 | 1.03025  |
| H            | 1.66203                  | -0.49041 | 4.28010  |

|   |          |          |          |
|---|----------|----------|----------|
| H | 2.43549  | 0.14585  | 2.79697  |
| H | 3.41543  | -0.73469 | 4.00274  |
| H | -0.69675 | 5.68067  | 1.38976  |
| H | -0.55873 | 5.76555  | -0.39713 |
| H | 0.80382  | 6.26469  | 0.63487  |
| H | 0.62290  | 3.92130  | 2.68680  |
| H | 2.13444  | 4.56349  | 1.97168  |
| H | 0.99409  | 4.09237  | -1.63697 |
| H | 2.31251  | 4.76951  | -0.63283 |
| H | 2.04474  | 3.00676  | -0.67197 |
| H | 3.84208  | 0.46510  | -3.56449 |
| H | 2.15298  | 0.99780  | -3.83117 |
| H | 4.29678  | -1.79698 | -2.38935 |
| H | 3.15347  | -1.36857 | -1.08412 |
| H | 1.78361  | -1.19959 | -5.19515 |
| H | 2.24406  | -2.76772 | -4.46240 |
| H | 3.49815  | -1.57547 | -4.85417 |
| H | 2.04279  | -4.14888 | 3.30818  |
| H | 2.91536  | -2.87445 | -2.01583 |
| H | 1.73992  | 2.82686  | 1.82323  |
| C | -3.27681 | -0.69644 | -0.16666 |
| C | -4.04448 | -0.84045 | 1.00957  |
| C | -5.43529 | -0.99913 | 0.97274  |
| C | -6.10860 | -1.00741 | -0.25556 |
| C | -5.37573 | -0.84166 | -1.43773 |
| C | -3.98509 | -0.68179 | -1.38631 |
| H | -3.54429 | -0.81492 | 1.98399  |
| H | -5.99721 | -1.11106 | 1.90677  |
| H | -7.19632 | -1.13176 | -0.29042 |
| H | -5.89085 | -0.82967 | -2.40479 |
| H | -3.43866 | -0.52618 | -2.32233 |
| H | -0.13079 | -3.79343 | 2.83996  |
| H | -2.27259 | -2.83434 | 1.41808  |
| H | -2.31469 | 4.35557  | 0.42435  |
| H | -3.55449 | 1.90331  | 0.14386  |
| H | 0.22213  | -2.87326 | -3.63387 |
| H | -1.99325 | -2.45691 | -2.10859 |
| H | 2.81592  | 0.89010  | -2.17157 |
| H | 3.24390  | 1.48940  | 1.09203  |

## 2. Thermodynamic cycle for the $\text{LoCo}^{\text{III}}\text{O}$ oxidant

### $[\text{LoCo}^{\text{III}}\text{O}] (S=0)$

80

o\_u0.out Energy: -1900520.4231349

|    |          |          |          |
|----|----------|----------|----------|
| B  | 1.71929  | 0.08420  | -0.21147 |
| Co | -1.42708 | 0.00194  | 0.08267  |
| O  | -2.99589 | 0.02935  | -0.48297 |
| C  | -2.05817 | 3.50218  | -0.97355 |
| C  | -2.00794 | 5.01293  | -1.26976 |
| C  | -2.90555 | 2.80467  | -2.06375 |
| C  | -2.73867 | 3.31493  | 0.40409  |
| C  | -1.44925 | -0.58937 | 3.73044  |
| C  | -1.26328 | -0.51053 | 5.25738  |
| C  | -2.47546 | 0.49268  | 3.32166  |

|   |          |          |          |
|---|----------|----------|----------|
| C | -2.00664 | -1.98298 | 3.35391  |
| C | -1.96217 | -3.14613 | -1.82177 |
| C | -2.66320 | -3.32119 | -0.45312 |
| C | -2.81693 | -2.22124 | -2.72016 |
| C | -1.86726 | -4.53576 | -2.47977 |
| H | -3.03512 | 5.40973  | -1.21597 |
| H | -1.40602 | 5.56634  | -0.53058 |
| H | -2.42557 | 2.90158  | -3.05375 |
| H | -3.90303 | 3.27678  | -2.11956 |
| H | -3.03152 | 1.73784  | -1.81274 |
| H | -2.13734 | 3.77362  | 1.20827  |
| H | -2.87822 | 2.24680  | 0.62355  |
| H | -3.73131 | 3.79802  | 0.39636  |
| H | -0.81724 | 0.44881  | 5.56857  |
| H | -0.65246 | -1.33380 | 5.65659  |
| H | -2.25286 | -0.58526 | 5.73776  |
| H | -2.08412 | 1.50590  | 3.51450  |
| H | -3.40587 | 0.36205  | 3.90040  |
| H | -1.30001 | -2.78197 | 3.63793  |
| H | -2.96434 | -2.16730 | 3.87156  |
| H | -2.17927 | -2.04633 | 2.26710  |
| H | -3.63990 | -3.81512 | -0.59723 |
| H | -2.05725 | -3.94589 | 0.22580  |
| H | -3.80020 | -2.68896 | -2.90868 |
| H | -2.97466 | -1.25479 | -2.21165 |
| H | -1.25772 | -5.23951 | -1.88965 |
| H | -1.47574 | -4.49625 | -3.50745 |
| H | -2.88367 | -4.95826 | -2.54175 |
| H | -1.63182 | 5.23771  | -2.27924 |
| H | -2.32369 | -2.05719 | -3.69467 |
| H | -2.73042 | 0.41980  | 2.25232  |
| C | 3.27946  | 0.15642  | -0.55077 |
| C | 4.32105  | 0.10550  | 0.39444  |
| C | 5.66650  | 0.18852  | 0.00536  |
| C | 6.00404  | 0.32642  | -1.34448 |
| C | 4.98374  | 0.38213  | -2.30447 |
| C | 3.64667  | 0.29846  | -1.90759 |
| H | 4.07820  | -0.00318 | 1.45323  |
| H | 6.45442  | 0.14494  | 0.76559  |
| H | 7.05420  | 0.39098  | -1.64966 |
| H | 5.23361  | 0.49135  | -3.36564 |
| H | 2.86565  | 0.34424  | -2.67385 |
| H | -2.83929 | -2.34204 | 0.01524  |
| C | -0.69639 | 2.81025  | -0.92506 |
| C | -0.62074 | -2.45299 | -1.58359 |
| C | -0.17694 | -0.37631 | 2.91555  |
| N | 0.93385  | 1.37387  | -0.65366 |
| N | 0.96879  | -1.08145 | -0.95990 |
| N | 1.23409  | -0.11420 | 1.27207  |
| C | -0.11382 | -0.15439 | 1.53095  |
| C | -0.38786 | -1.26470 | -0.86461 |
| C | -0.42591 | 1.48937  | -0.51999 |
| N | 1.98905  | -0.30061 | 2.33607  |
| N | 1.51768  | 2.46201  | -1.10756 |
| N | 1.58245  | -2.01005 | -1.66039 |
| C | 1.72382  | -0.71946 | 4.64437  |
| H | 1.44065  | 0.06624  | 5.35682  |
| H | 1.39971  | -1.69849 | 5.02333  |
| H | 2.81313  | -0.72083 | 4.51223  |

|   |         |          |          |
|---|---------|----------|----------|
| C | 0.93274 | 4.62791  | -1.81533 |
| H | 0.42169 | 4.82078  | -2.76771 |
| H | 0.70688 | 5.43138  | -1.10285 |
| H | 2.01598 | 4.57866  | -1.98313 |
| C | 1.06157 | -3.95400 | -2.87689 |
| H | 0.85135 | -4.91266 | -2.38618 |
| H | 0.56419 | -3.91973 | -3.85506 |
| H | 2.14446 | -3.83913 | -3.01148 |
| N | 1.13493 | -0.46421 | 3.33207  |
| N | 0.53443 | 3.32839  | -1.27673 |
| N | 0.62442 | -2.83582 | -2.04241 |

[L<sub>0</sub>Co<sup>III</sup>O] (S=1)

80

o\_u2.out Energy: -1900514.0970237

|    |          |          |          |
|----|----------|----------|----------|
| B  | 1.63671  | 0.08692  | -0.19947 |
| Co | -1.43732 | 0.02426  | 0.14109  |
| O  | -3.00488 | 0.08020  | -0.40525 |
| C  | -2.01359 | 3.66726  | -0.97412 |
| C  | -1.89974 | 5.19163  | -1.16106 |
| C  | -2.81899 | 3.05168  | -2.14339 |
| C  | -2.77200 | 3.39556  | 0.34656  |
| C  | -1.45338 | -0.64781 | 3.79259  |
| C  | -1.25208 | -0.58920 | 5.31798  |
| C  | -2.48547 | 0.43611  | 3.40296  |
| C  | -2.00815 | -2.03668 | 3.39448  |
| C  | -1.94839 | -3.27256 | -1.80263 |
| C  | -2.71313 | -3.33259 | -0.45925 |
| C  | -2.75806 | -2.40440 | -2.79536 |
| C  | -1.81807 | -4.70630 | -2.34883 |
| H  | -2.90625 | 5.63399  | -1.07648 |
| H  | -1.26827 | 5.65574  | -0.38447 |
| H  | -2.29647 | 3.19482  | -3.10557 |
| H  | -3.81070 | 3.53316  | -2.21638 |
| H  | -2.96014 | 1.97335  | -1.96006 |
| H  | -2.20032 | 3.76392  | 1.21602  |
| H  | -2.95651 | 2.31711  | 0.46598  |
| H  | -3.74529 | 3.91623  | 0.32656  |
| H  | -0.80155 | 0.36603  | 5.63569  |
| H  | -0.63508 | -1.41703 | 5.69797  |
| H  | -2.23548 | -0.67131 | 5.80973  |
| H  | -2.09913 | 1.44777  | 3.61285  |
| H  | -3.41472 | 0.29069  | 3.97970  |
| H  | -1.29822 | -2.83874 | 3.66072  |
| H  | -2.96301 | -2.23294 | 3.91284  |
| H  | -2.18491 | -2.08034 | 2.30673  |
| H  | -3.68240 | -3.83950 | -0.60866 |
| H  | -2.14173 | -3.89616 | 0.29846  |
| H  | -3.74511 | -2.86349 | -2.98400 |
| H  | -2.90934 | -1.40149 | -2.36261 |
| H  | -1.19080 | -5.33995 | -1.69925 |
| H  | -1.41563 | -4.73913 | -3.37253 |
| H  | -2.82120 | -5.16264 | -2.38582 |
| H  | -1.51071 | 5.47432  | -2.15083 |
| H  | -2.23237 | -2.31120 | -3.76190 |
| H  | -2.74386 | 0.38328  | 2.33268  |
| C  | 3.19784  | 0.17727  | -0.54692 |

|   |          |          |          |
|---|----------|----------|----------|
| C | 4.23204  | 0.24991  | 0.40545  |
| C | 5.57603  | 0.37403  | 0.02181  |
| C | 5.92154  | 0.43202  | -1.33146 |
| C | 4.90921  | 0.36865  | -2.29935 |
| C | 3.57387  | 0.24544  | -1.90747 |
| H | 3.98663  | 0.20463  | 1.46799  |
| H | 6.35602  | 0.42595  | 0.78970  |
| H | 6.97034  | 0.52813  | -1.63310 |
| H | 5.16369  | 0.41760  | -3.36396 |
| H | 2.80153  | 0.20295  | -2.68162 |
| H | -2.90723 | -2.31647 | -0.08284 |
| C | -0.67814 | 2.93510  | -0.90652 |
| C | -0.62187 | -2.56159 | -1.55768 |
| C | -0.18984 | -0.41591 | 2.97239  |
| N | 0.86680  | 1.41170  | -0.62834 |
| N | 0.89866  | -1.11691 | -0.93849 |
| N | 1.18297  | -0.11821 | 1.29590  |
| C | -0.15427 | -0.15271 | 1.59926  |
| C | -0.44195 | -1.39920 | -0.80318 |
| C | -0.47504 | 1.63850  | -0.42672 |
| N | 1.96120  | -0.35165 | 2.33764  |
| N | 1.49069  | 2.43095  | -1.19006 |
| N | 1.54262  | -1.98554 | -1.69546 |
| C | 1.74175  | -0.83499 | 4.64121  |
| H | 1.48241  | -0.06551 | 5.38017  |
| H | 1.40907  | -1.81965 | 4.99807  |
| H | 2.82826  | -0.84859 | 4.48859  |
| C | 0.98637  | 4.58543  | -2.01202 |
| H | 0.41699  | 4.74789  | -2.93768 |
| H | 0.85186  | 5.44252  | -1.33902 |
| H | 2.05087  | 4.46780  | -2.25135 |
| C | 1.07964  | -3.92079 | -2.96474 |
| H | 0.94014  | -4.90270 | -2.49369 |
| H | 0.53228  | -3.88506 | -3.91673 |
| H | 2.14772  | -3.74854 | -3.14852 |
| N | 1.13064  | -0.53397 | 3.34921  |
| N | 0.55635  | 3.34780  | -1.36596 |
| N | 0.62289  | -2.85320 | -2.07825 |

[L<sub>0</sub>Co<sup>III</sup>O] (S=2)

80

o\_u4.out Energy: -1900510.1392336

|    |          |          |          |
|----|----------|----------|----------|
| B  | 1.53463  | 0.16623  | -0.23323 |
| Co | -1.62039 | 0.19640  | 0.16104  |
| O  | -3.30322 | 0.12875  | -0.00862 |
| C  | -1.98376 | 3.77219  | -1.32506 |
| C  | -1.86473 | 5.22659  | -1.81072 |
| C  | -2.82374 | 2.96005  | -2.34029 |
| C  | -2.71451 | 3.75886  | 0.03987  |
| C  | -1.31423 | -0.91227 | 3.93691  |
| C  | -0.98663 | -0.63164 | 5.42016  |
| C  | -2.52055 | -0.03261 | 3.54348  |
| C  | -1.69553 | -2.39977 | 3.74619  |
| C  | -2.08487 | -3.10507 | -1.83388 |
| C  | -2.67996 | -3.37188 | -0.42871 |
| C  | -3.00829 | -2.11872 | -2.58747 |
| C  | -2.03067 | -4.42942 | -2.61461 |



|   |          |          |          |
|---|----------|----------|----------|
| H | -2.87584 | 5.66115  | -1.87913 |
| H | -1.28632 | 5.85321  | -1.11252 |
| H | -2.32194 | 2.91192  | -3.32228 |
| H | -3.81104 | 3.43494  | -2.47969 |
| H | -2.97797 | 1.93511  | -1.96510 |
| H | -2.12242 | 4.27804  | 0.81318  |
| H | -2.89842 | 2.72241  | 0.36634  |
| H | -3.68879 | 4.27021  | -0.05181 |
| H | -0.57133 | 0.38175  | 5.55487  |
| H | -0.28313 | -1.35817 | 5.85182  |
| H | -1.91359 | -0.69734 | 6.01372  |
| H | -2.27343 | 1.03875  | 3.63544  |
| H | -3.36784 | -0.25194 | 4.21512  |
| H | -0.85838 | -3.07181 | 4.00233  |
| H | -2.55114 | -2.66167 | 4.39270  |
| H | -1.97892 | -2.58993 | 2.69719  |
| H | -3.67084 | -3.85032 | -0.52292 |
| H | -2.02773 | -4.04169 | 0.15849  |
| H | -4.00312 | -2.57586 | -2.73323 |
| H | -3.13261 | -1.19240 | -2.00414 |
| H | -1.44430 | -5.20291 | -2.09422 |
| H | -1.62474 | -4.29805 | -3.63069 |
| H | -3.05694 | -4.81836 | -2.72121 |
| H | -1.41263 | 5.30014  | -2.81234 |
| H | -2.59436 | -1.87209 | -3.58073 |
| H | -2.84837 | -0.21004 | 2.50738  |
| C | 3.11729  | 0.29119  | -0.47134 |
| C | 3.97020  | 0.84362  | 0.50606  |
| C | 5.32897  | 1.07133  | 0.25594  |
| C | 5.87632  | 0.75896  | -0.99397 |
| C | 5.04665  | 0.22815  | -1.98886 |
| C | 3.68953  | 0.00452  | -1.72797 |
| H | 3.56896  | 1.10505  | 1.48862  |
| H | 5.96253  | 1.49860  | 1.04122  |
| H | 6.93932  | 0.93355  | -1.19321 |
| H | 5.45743  | -0.01041 | -2.97628 |
| H | 3.06332  | -0.40342 | -2.52552 |
| H | -2.80421 | -2.42276 | 0.11780  |
| C | -0.65696 | 3.04116  | -1.14525 |
| C | -0.73785 | -2.41727 | -1.63198 |
| C | -0.15723 | -0.60033 | 2.99818  |
| N | 0.81939  | 1.50298  | -0.68440 |
| N | 0.80392  | -1.00755 | -1.00838 |
| N | 1.08259  | -0.11162 | 1.27039  |
| C | -0.22799 | -0.10110 | 1.69847  |
| C | -0.55870 | -1.18461 | -0.99981 |
| C | -0.52971 | 1.74620  | -0.64336 |
| N | 1.92089  | -0.59208 | 2.16543  |
| N | 1.52165  | 2.51727  | -1.16150 |
| N | 1.46376  | -2.00935 | -1.56167 |
| C | 1.86102  | -1.45765 | 4.36978  |
| H | 1.86343  | -0.74403 | 5.20598  |
| H | 1.36752  | -2.38963 | 4.67869  |
| H | 2.89296  | -1.67269 | 4.06428  |
| C | 1.14938  | 4.69008  | -2.00870 |
| H | 0.73548  | 4.85852  | -3.01197 |
| H | 0.90299  | 5.54072  | -1.35978 |
| H | 2.23913  | 4.57928  | -2.07389 |
| C | 1.00452  | -4.07319 | -2.61206 |

|   |         |          |          |
|---|---------|----------|----------|
| H | 0.71853 | -4.96333 | -2.03597 |
| H | 0.59262 | -4.14257 | -3.62743 |
| H | 2.09849 | -4.00386 | -2.66192 |
| N | 1.17511 | -0.88938 | 3.21350  |
| N | 0.62663 | 3.44747  | -1.44467 |
| N | 0.52956 | -2.86099 | -1.94814 |

[L<sub>0</sub>Co<sup>III</sup>OH]<sup>+</sup> (S=0)

81

p\_u0.out Energy: -1900834.0174341

|    |          |          |          |
|----|----------|----------|----------|
| C  | 0.50101  | 1.25289  | -0.89182 |
| N  | -0.78714 | 1.47521  | -0.49051 |
| B  | -1.58094 | 0.46058  | 0.41605  |
| N  | -1.49015 | -0.88917 | -0.38732 |
| C  | -0.29335 | -1.43334 | -0.76030 |
| N  | -0.54953 | 0.20253  | 1.59010  |
| C  | 0.74943  | -0.16824 | 1.31396  |
| Co | 1.26503  | -0.42231 | -0.53843 |
| O  | 2.00366  | -0.72592 | -2.16425 |
| C  | 2.25403  | 2.88478  | -2.06483 |
| C  | 2.57113  | 4.37275  | -1.78167 |
| C  | 3.37657  | 2.05113  | -1.40806 |
| C  | 2.25539  | 2.62636  | -3.58850 |
| C  | 0.29494  | -3.83764 | -1.72856 |
| C  | -0.25610 | -5.23693 | -1.36761 |
| C  | 0.47455  | -3.72336 | -3.25910 |
| C  | 1.67187  | -3.69719 | -1.03923 |
| C  | 2.78490  | -0.60043 | 2.93971  |
| C  | 3.56213  | -0.93348 | 1.65191  |
| C  | 3.45920  | 0.62968  | 3.59244  |
| C  | 2.85885  | -1.82588 | 3.87879  |
| H  | 3.63056  | 4.55785  | -2.02126 |
| H  | 1.98634  | 5.06893  | -2.39793 |
| H  | 3.33773  | 2.13105  | -0.30727 |
| H  | 4.35633  | 2.42925  | -1.74272 |
| H  | 3.30367  | 0.99406  | -1.69620 |
| H  | 1.46130  | 3.19555  | -4.10087 |
| H  | 2.10386  | 1.55469  | -3.79300 |
| H  | 3.22412  | 2.92928  | -4.02153 |
| H  | -1.11187 | -5.53950 | -1.98657 |
| H  | -0.54491 | -5.29952 | -0.30469 |
| H  | 0.53592  | -5.98250 | -1.54328 |
| H  | -0.49092 | -3.79933 | -3.78785 |
| H  | 1.12771  | -4.53449 | -3.62424 |
| H  | 1.56529  | -3.66198 | 0.05897  |
| H  | 2.29940  | -4.56698 | -1.29404 |
| H  | 2.19405  | -2.79516 | -1.38445 |
| H  | 4.60605  | -1.18294 | 1.90236  |
| H  | 3.13114  | -1.80411 | 1.13147  |
| H  | 4.51811  | 0.40366  | 3.80269  |
| H  | 3.41937  | 1.50008  | 2.91640  |
| H  | 2.34974  | -2.69539 | 3.42989  |
| H  | 2.40983  | -1.63415 | 4.86461  |
| H  | 3.91405  | -2.09704 | 4.04974  |
| H  | 2.41972  | 4.62467  | -0.71826 |
| H  | 2.99082  | 0.91755  | 4.54622  |

|   |          |          |          |
|---|----------|----------|----------|
| H | 0.94115  | -2.75932 | -3.51402 |
| C | -3.07153 | 0.92748  | 0.72367  |
| C | -3.93214 | 1.10663  | -0.38262 |
| C | -5.25381 | 1.53052  | -0.22385 |
| C | -5.75608 | 1.78958  | 1.05881  |
| C | -4.92320 | 1.61971  | 2.16901  |
| C | -3.59749 | 1.19415  | 2.00171  |
| H | -3.56038 | 0.91176  | -1.39429 |
| H | -5.89543 | 1.66069  | -1.10199 |
| H | -6.79129 | 2.12266  | 1.18922  |
| H | -5.30481 | 1.81975  | 3.17614  |
| H | -2.96494 | 1.06838  | 2.88205  |
| H | 3.59178  | -0.07184 | 0.96406  |
| H | 1.43922  | -0.56578 | -2.93749 |
| C | -0.61216 | -2.70933 | -1.24603 |
| C | 1.34511  | -0.27662 | 2.57381  |
| C | 0.90666  | 2.45703  | -1.48700 |
| C | 0.32665  | 0.00780  | 4.93413  |
| H | -0.55341 | 0.57445  | 5.26393  |
| H | 0.25499  | -1.02859 | 5.29641  |
| H | 1.23537  | 0.47674  | 5.32902  |
| C | -2.94167 | -3.78340 | -1.60040 |
| H | -2.69803 | -4.11018 | -2.61985 |
| H | -2.92690 | -4.64108 | -0.91457 |
| H | -3.93576 | -3.31888 | -1.58994 |
| C | -0.48222 | 4.59552  | -1.94684 |
| H | 0.01334  | 5.35277  | -1.32440 |
| H | -0.13079 | 4.66995  | -2.98414 |
| H | -1.56884 | 4.74444  | -1.91433 |
| N | -2.51315 | -1.67089 | -0.63719 |
| N | -1.23182 | 2.66456  | -0.81716 |
| N | -0.79670 | 0.31484  | 2.87349  |
| N | 0.34059  | 0.02779  | 3.47309  |
| N | -1.99151 | -2.75946 | -1.16653 |
| N | -0.22347 | 3.25272  | -1.42750 |

**[LoCo<sup>III</sup>OH]<sup>+</sup> (S=1)**

81

p\_u2.out Energy: -1900823.7042469

|    |          |          |          |
|----|----------|----------|----------|
| C  | 0.61890  | 1.34444  | -0.85929 |
| N  | -0.71670 | 1.45603  | -0.55631 |
| B  | -1.52357 | 0.42073  | 0.34638  |
| N  | -1.44415 | -0.99614 | -0.36878 |
| C  | -0.27383 | -1.65545 | -0.64640 |
| N  | -0.51370 | 0.22033  | 1.54680  |
| C  | 0.77727  | -0.16322 | 1.29086  |
| Co | 1.31139  | -0.45768 | -0.56744 |
| O  | 1.88501  | -0.75504 | -2.24784 |
| C  | 2.30100  | 3.05616  | -1.95968 |
| C  | 2.60331  | 4.48981  | -1.46417 |
| C  | 3.40752  | 2.13077  | -1.40951 |
| C  | 2.32732  | 3.01163  | -3.50476 |
| C  | 0.19437  | -4.03247 | -1.66081 |
| C  | -0.31443 | -5.41647 | -1.20023 |
| C  | 0.23396  | -3.95044 | -3.20495 |
| C  | 1.62817  | -3.84391 | -1.11896 |
| C  | 2.81490  | -0.59367 | 2.89717  |

|   |          |          |          |
|---|----------|----------|----------|
| C | 3.54417  | -0.99714 | 1.60032  |
| C | 3.53166  | 0.64303  | 3.48731  |
| C | 2.87868  | -1.78264 | 3.88188  |
| H | 3.65046  | 4.73955  | -1.70171 |
| H | 1.97785  | 5.25461  | -1.94583 |
| H | 3.40479  | 2.12444  | -0.30615 |
| H | 4.39141  | 2.49261  | -1.74975 |
| H | 3.28545  | 1.09491  | -1.75838 |
| H | 1.55387  | 3.65628  | -3.95345 |
| H | 2.16429  | 1.98511  | -3.87398 |
| H | 3.30768  | 3.35566  | -3.87535 |
| H | -1.24881 | -5.71990 | -1.69355 |
| H | -0.46883 | -5.44403 | -0.10804 |
| H | 0.43988  | -6.17933 | -1.45410 |
| H | -0.76827 | -4.06828 | -3.65053 |
| H | 0.87855  | -4.75009 | -3.60857 |
| H | 1.63722  | -3.80026 | -0.01652 |
| H | 2.25278  | -4.69590 | -1.43463 |
| H | 2.08321  | -2.92628 | -1.51819 |
| H | 4.58146  | -1.29054 | 1.82926  |
| H | 3.05771  | -1.85904 | 1.11173  |
| H | 4.59044  | 0.40126  | 3.67996  |
| H | 3.49291  | 1.49003  | 2.78213  |
| H | 2.33986  | -2.65677 | 3.47933  |
| H | 2.45546  | -1.53903 | 4.86771  |
| H | 3.93064  | -2.07158 | 4.04245  |
| H | 2.47515  | 4.56861  | -0.37139 |
| H | 3.09158  | 0.97251  | 4.44153  |
| H | 0.64402  | -2.97574 | -3.51646 |
| C | -3.02137 | 0.89102  | 0.62099  |
| C | -3.86867 | 1.05769  | -0.49751 |
| C | -5.19568 | 1.47090  | -0.35887 |
| C | -5.71835 | 1.73187  | 0.91546  |
| C | -4.89947 | 1.57424  | 2.03742  |
| C | -3.56784 | 1.15885  | 1.88996  |
| H | -3.48190 | 0.86056  | -1.50279 |
| H | -5.82619 | 1.59075  | -1.24651 |
| H | -6.75820 | 2.05634  | 1.02983  |
| H | -5.29627 | 1.77528  | 3.03849  |
| H | -2.94809 | 1.04267  | 2.78069  |
| H | 3.60212  | -0.15103 | 0.89311  |
| H | 1.69815  | -0.03658 | -2.87364 |
| C | -0.66955 | -2.89422 | -1.14218 |
| C | 1.37793  | -0.25047 | 2.54521  |
| C | 0.95314  | 2.56009  | -1.45310 |
| C | 0.37588  | 0.12315  | 4.89499  |
| H | -0.49956 | 0.70406  | 5.21193  |
| H | 0.30654  | -0.89894 | 5.29584  |
| H | 1.29026  | 0.60524  | 5.26086  |
| C | -3.03905 | -3.84055 | -1.54313 |
| H | -2.78690 | -4.22858 | -2.53897 |
| H | -3.07715 | -4.66575 | -0.81793 |
| H | -4.01178 | -3.33393 | -1.57915 |
| C | -0.53505 | 4.60590  | -1.98998 |
| H | -0.17526 | 5.37215  | -1.28838 |
| H | -0.06568 | 4.74717  | -2.97185 |
| H | -1.62560 | 4.67860  | -2.08824 |
| N | -2.51223 | -1.70803 | -0.65431 |
| N | -1.22978 | 2.60781  | -0.92978 |

|   |          |          |          |
|---|----------|----------|----------|
| N | -0.76018 | 0.36508  | 2.82815  |
| N | 0.37666  | 0.08954  | 3.43423  |
| N | -2.04916 | -2.84801 | -1.13069 |
| N | -0.23349 | 3.26979  | -1.47987 |

[L<sub>o</sub>Co<sup>III</sup>OH]<sup>+</sup> (S=2)

81

p\_u4.out Energy: -1900808.5216804

|    |          |          |          |
|----|----------|----------|----------|
| C  | 0.57897  | 1.26366  | -0.98169 |
| N  | -0.67222 | 1.49242  | -0.46558 |
| B  | -1.44529 | 0.45953  | 0.45304  |
| N  | -1.40383 | -0.90486 | -0.36062 |
| C  | -0.27130 | -1.54301 | -0.78966 |
| N  | -0.43443 | 0.25469  | 1.66381  |
| C  | 0.84643  | -0.23668 | 1.55647  |
| Co | 1.43165  | -0.53319 | -0.39013 |
| O  | 3.14439  | -0.71176 | -0.92968 |
| C  | 2.20243  | 2.71747  | -2.40593 |
| C  | 2.24972  | 4.06137  | -3.15469 |
| C  | 3.35572  | 2.67950  | -1.37416 |
| C  | 2.39334  | 1.58144  | -3.43907 |
| C  | 0.13684  | -3.68050 | -2.21573 |
| C  | -0.57520 | -5.00757 | -2.54013 |
| C  | 0.61386  | -3.01429 | -3.52926 |
| C  | 1.36402  | -4.00178 | -1.33103 |
| C  | 2.73764  | -0.55104 | 3.36479  |
| C  | 3.40898  | -1.47295 | 2.32728  |
| C  | 3.58694  | 0.73264  | 3.51905  |
| C  | 2.67078  | -1.31627 | 4.70651  |
| H  | 3.21058  | 4.12735  | -3.69062 |
| H  | 1.45031  | 4.14988  | -3.90727 |
| H  | 3.22173  | 3.45977  | -0.60559 |
| H  | 4.31807  | 2.86029  | -1.88369 |
| H  | 3.40807  | 1.69586  | -0.88285 |
| H  | 1.57863  | 1.58205  | -4.18286 |
| H  | 2.41531  | 0.60042  | -2.94314 |
| H  | 3.34970  | 1.71751  | -3.97212 |
| H  | -1.37341 | -4.89026 | -3.28739 |
| H  | -0.99625 | -5.47835 | -1.63646 |
| H  | 0.16102  | -5.70825 | -2.96621 |
| H  | -0.23821 | -2.76294 | -4.18323 |
| H  | 1.28079  | -3.69959 | -4.07983 |
| H  | 1.05581  | -4.43811 | -0.36636 |
| H  | 2.01369  | -4.72649 | -1.84913 |
| H  | 1.96876  | -3.10557 | -1.12280 |
| H  | 4.39683  | -1.78657 | 2.70314  |
| H  | 2.80433  | -2.37844 | 2.14896  |
| H  | 4.60081  | 0.47198  | 3.86741  |
| H  | 3.67571  | 1.25643  | 2.55255  |
| H  | 1.96645  | -2.16341 | 4.64947  |
| H  | 2.38457  | -0.67920 | 5.55522  |
| H  | 3.66940  | -1.72202 | 4.93724  |
| H  | 2.20059  | 4.92532  | -2.47471 |
| H  | 3.15080  | 1.43408  | 4.24968  |
| H  | 1.16821  | -2.08425 | -3.31764 |
| C  | -2.94336 | 0.78650  | 0.90789  |
| C  | -3.78419 | 1.72498  | 0.27921  |

|   |          |          |          |
|---|----------|----------|----------|
| C | -5.12112 | 1.88684  | 0.66879  |
| C | -5.65713 | 1.10464  | 1.69633  |
| C | -4.84566 | 0.15166  | 2.32590  |
| C | -3.51391 | -0.00268 | 1.93160  |
| H | -3.39252 | 2.34659  | -0.52745 |
| H | -5.74653 | 2.62950  | 0.16154  |
| H | -6.70109 | 1.23117  | 2.00254  |
| H | -5.25381 | -0.47583 | 3.12560  |
| H | -2.90686 | -0.76252 | 2.43381  |
| H | 3.56085  | -0.97282 | 1.36037  |
| H | 3.37257  | -1.17735 | -1.75222 |
| C | -0.72787 | -2.66714 | -1.47660 |
| C | 1.35762  | -0.16847 | 2.85273  |
| C | 0.90289  | 2.44301  | -1.65438 |
| C | 0.27943  | 0.73763  | 5.02116  |
| H | -0.59864 | 1.38079  | 5.16064  |
| H | 0.17230  | -0.17294 | 5.62751  |
| H | 1.18615  | 1.28090  | 5.31722  |
| C | -3.15734 | -3.43881 | -1.94949 |
| H | -3.07278 | -3.49352 | -3.04311 |
| H | -3.09462 | -4.44526 | -1.51634 |
| H | -4.11399 | -2.97648 | -1.67601 |
| C | -0.45498 | 4.64411  | -1.89074 |
| H | 0.30798  | 5.32596  | -1.49412 |
| H | -0.47718 | 4.70296  | -2.98622 |
| H | -1.43784 | 4.91508  | -1.48563 |
| N | -2.50390 | -1.52260 | -0.72580 |
| N | -1.12551 | 2.69657  | -0.73902 |
| N | -0.73113 | 0.64521  | 2.88149  |
| N | 0.34459  | 0.39608  | 3.60136  |
| N | -2.10233 | -2.58240 | -1.40587 |
| N | -0.18159 | 3.27242  | -1.45867 |

[ $\text{LoCo}^{\text{II}}\text{O}^-$ ] ( $S=1/2$ )

80

r\_u1.out Energy: -1900565.4570046

|    |          |          |          |
|----|----------|----------|----------|
| C  | -0.52579 | -0.77292 | -1.35367 |
| N  | 0.76927  | -1.17925 | -1.08214 |
| B  | 1.61075  | -0.53487 | 0.08702  |
| N  | 1.40835  | 1.00222  | -0.09616 |
| C  | 0.14442  | 1.55006  | -0.15684 |
| N  | 0.77488  | -0.88919 | 1.37647  |
| C  | -0.52112 | -0.43645 | 1.55444  |
| Co | -1.38617 | 0.37056  | -0.01013 |
| O  | -3.05316 | -0.10642 | 0.04816  |
| C  | -2.24901 | -1.65935 | -3.11913 |
| C  | -2.22843 | -2.31518 | -4.51419 |
| C  | -3.23893 | -2.40047 | -2.19014 |
| C  | -2.74065 | -0.20174 | -3.27962 |
| C  | -0.65224 | 4.00604  | -0.46629 |
| C  | -0.12825 | 5.43987  | -0.65714 |
| C  | -1.53758 | 3.64107  | -1.68197 |
| C  | -1.51535 | 3.96472  | 0.81720  |
| C  | -2.24603 | -0.93660 | 3.46407  |
| C  | -2.75128 | 0.51709  | 3.31198  |
| C  | -3.22065 | -1.86684 | 2.70363  |
| C  | -2.23200 | -1.28552 | 4.96551  |

|   |          |          |          |
|---|----------|----------|----------|
| H | -3.20603 | -2.15006 | -4.99823 |
| H | -1.45618 | -1.87244 | -5.16771 |
| H | -2.90044 | -3.43425 | -1.99192 |
| H | -4.23876 | -2.45389 | -2.66151 |
| H | -3.30911 | -1.82619 | -1.24394 |
| H | -2.02801 | 0.39703  | -3.87443 |
| H | -2.86229 | 0.25303  | -2.28201 |
| H | -3.71613 | -0.19600 | -3.79942 |
| H | 0.46349  | 5.55026  | -1.58016 |
| H | 0.47999  | 5.78094  | 0.19601  |
| H | -0.98918 | 6.12510  | -0.73812 |
| H | -0.95288 | 3.67936  | -2.61790 |
| H | -2.38237 | 4.34740  | -1.77063 |
| H | -0.91611 | 4.24390  | 1.70166  |
| H | -2.36423 | 4.66699  | 0.73613  |
| H | -1.90915 | 2.94691  | 0.97666  |
| H | -3.72804 | 0.62369  | 3.81837  |
| H | -2.04557 | 1.23504  | 3.76674  |
| H | -4.22502 | -1.82857 | 3.16696  |
| H | -3.28523 | -1.50650 | 1.65581  |
| H | -1.47165 | -0.70541 | 5.51768  |
| H | -2.06571 | -2.35631 | 5.15840  |
| H | -3.21635 | -1.03619 | 5.39696  |
| H | -2.07543 | -3.40457 | -4.47733 |
| H | -2.87249 | -2.91595 | 2.73304  |
| H | -1.93858 | 2.61965  | -1.56948 |
| C | 3.17811  | -0.90105 | 0.13801  |
| C | 3.91766  | -1.18317 | -1.02910 |
| C | 5.30464  | -1.37886 | -0.99778 |
| C | 6.00159  | -1.28936 | 0.21302  |
| C | 5.29439  | -0.99450 | 1.38531  |
| C | 3.90818  | -0.80104 | 1.34114  |
| H | 3.39663  | -1.25913 | -1.98687 |
| H | 5.84435  | -1.60046 | -1.92579 |
| H | 7.08607  | -1.44375 | 0.24258  |
| H | 5.82615  | -0.91213 | 2.34029  |
| H | 3.37960  | -0.57032 | 2.27008  |
| H | -2.87557 | 0.74784  | 2.24070  |
| N | 0.17887  | -1.82505 | 3.15273  |
| N | 1.78781  | 3.04379  | -0.35922 |
| N | 0.16649  | -2.47963 | -2.60976 |
| C | 0.35175  | -3.61247 | -3.50908 |
| H | -0.45200 | -4.34891 | -3.36681 |
| H | 0.36661  | -3.28607 | -4.55845 |
| H | 1.31618  | -4.07107 | -3.25469 |
| C | 2.66147  | 4.20167  | -0.51011 |
| H | 2.48637  | 4.69990  | -1.47361 |
| H | 2.50139  | 4.92023  | 0.30570  |
| H | 3.69372  | 3.83037  | -0.47283 |
| C | 0.37196  | -2.73036 | 4.27956  |
| H | 0.37243  | -2.18185 | 5.23187  |
| H | -0.41922 | -3.49349 | 4.29788  |
| H | 1.34546  | -3.21735 | 4.13733  |
| N | 1.19212  | -1.73778 | 2.30438  |
| N | 2.39940  | 1.87729  | -0.21516 |
| N | 1.18125  | -2.21275 | -1.80153 |
| C | -0.89740 | -1.62515 | -2.41445 |
| C | 0.41579  | 2.92518  | -0.33446 |
| C | -0.88938 | -1.03921 | 2.77584  |

[L<sub>0</sub>Co<sup>II</sup>O] (S=3/2)

80

r\_u3.out Energy: -1900568.5119466

|    |          |          |          |
|----|----------|----------|----------|
| C  | -0.59741 | -0.69970 | -1.31376 |
| N  | 0.72434  | -1.03246 | -1.05196 |
| B  | 1.57442  | -0.36539 | 0.10956  |
| N  | 1.40880  | 1.19500  | -0.06601 |
| C  | 0.19945  | 1.85566  | -0.10787 |
| N  | 0.75454  | -0.78315 | 1.39906  |
| C  | -0.57363 | -0.44800 | 1.56370  |
| Co | -1.40047 | 0.62788  | 0.04813  |
| O  | -3.06435 | 1.15524  | 0.10774  |
| C  | -2.37296 | -1.89311 | -2.82348 |
| C  | -2.37035 | -2.45794 | -4.26124 |
| C  | -3.13290 | -2.85710 | -1.88120 |
| C  | -3.10987 | -0.53601 | -2.84638 |
| C  | -0.42764 | 4.31894  | -0.55423 |
| C  | 0.19337  | 5.71775  | -0.70341 |
| C  | -1.25654 | 3.98431  | -1.81906 |
| C  | -1.38779 | 4.31873  | 0.65983  |
| C  | -2.36301 | -1.20268 | 3.26874  |
| C  | -2.80246 | 0.26476  | 3.49033  |
| C  | -3.28858 | -1.81527 | 2.18760  |
| C  | -2.52280 | -1.98101 | 4.58541  |
| H  | -3.39236 | -2.40537 | -4.67368 |
| H  | -1.71093 | -1.86911 | -4.92234 |
| H  | -2.64005 | -3.84418 | -1.82859 |
| H  | -4.16837 | -3.01219 | -2.23411 |
| H  | -3.16869 | -2.43655 | -0.86274 |
| H  | -2.58032 | 0.18035  | -3.49922 |
| H  | -3.18466 | -0.08037 | -1.84228 |
| H  | -4.12732 | -0.68116 | -3.25270 |
| H  | 0.82696  | 5.80534  | -1.60060 |
| H  | 0.79078  | 6.00194  | 0.17909  |
| H  | -0.61598 | 6.46063  | -0.80464 |
| H  | -0.61230 | 3.92842  | -2.71445 |
| H  | -2.02265 | 4.76201  | -1.99205 |
| H  | -0.83597 | 4.49475  | 1.60033  |
| H  | -2.13789 | 5.12258  | 0.54521  |
| H  | -1.91442 | 3.35000  | 0.72275  |
| H  | -3.82745 | 0.28964  | 3.90380  |
| H  | -2.13169 | 0.77699  | 4.20299  |
| H  | -4.32986 | -1.85436 | 2.55688  |
| H  | -3.25917 | -1.18071 | 1.28386  |
| H  | -1.87870 | -1.57936 | 5.38571  |
| H  | -2.31178 | -3.05620 | 4.46943  |
| H  | -3.56725 | -1.89183 | 4.92925  |
| H  | -2.06304 | -3.51316 | -4.31376 |
| H  | -2.97637 | -2.84247 | 1.92798  |
| H  | -1.76313 | 3.01417  | -1.67733 |
| C  | 3.14143  | -0.73996 | 0.14144  |
| C  | 3.86875  | -1.01902 | -1.03348 |
| C  | 5.25467  | -1.22215 | -1.01588 |
| C  | 5.96297  | -1.14339 | 0.18926  |
| C  | 5.26773  | -0.85150 | 1.36936  |



|   |          |          |          |
|---|----------|----------|----------|
| C | 3.88225  | -0.65058 | 1.33843  |
| H | 3.33990  | -1.08379 | -1.98791 |
| H | 5.78503  | -1.44044 | -1.95004 |
| H | 7.04686  | -1.30347 | 0.20825  |
| H | 5.80823  | -0.77686 | 2.32008  |
| H | 3.36381  | -0.42044 | 2.27322  |
| H | -2.79948 | 0.80138  | 2.52438  |
| N | 0.16753  | -1.89329 | 3.08205  |
| N | 1.94731  | 3.18808  | -0.44394 |
| N | 0.10762  | -2.50995 | -2.40647 |
| C | 0.28886  | -3.71315 | -3.20849 |
| H | -0.50658 | -4.43982 | -2.98850 |
| H | 0.27837  | -3.47391 | -4.28195 |
| H | 1.26157  | -4.14404 | -2.93762 |
| C | 2.90355  | 4.26011  | -0.69826 |
| H | 2.73244  | 4.70321  | -1.68960 |
| H | 2.82372  | 5.04276  | 0.06858  |
| H | 3.90606  | 3.81433  | -0.66497 |
| C | 0.39536  | -2.83885 | 4.16958  |
| H | 0.21547  | -2.36329 | 5.14347  |
| H | -0.26152 | -3.71388 | 4.06513  |
| H | 1.44321  | -3.15927 | 4.10560  |
| N | 1.20538  | -1.65917 | 2.29140  |
| N | 2.46295  | 1.98189  | -0.26725 |
| N | 1.14398  | -2.12217 | -1.68374 |
| C | -0.97983 | -1.67709 | -2.24649 |
| C | 0.57161  | 3.18406  | -0.35509 |
| C | -0.94826 | -1.18142 | 2.69855  |

[LoCo<sup>II</sup>O]<sup>-</sup> (S = 5/2)

80

r\_u5.out Energy: -1900545.1677284

|    |          |          |          |
|----|----------|----------|----------|
| C  | -0.58573 | -0.68930 | -1.36952 |
| N  | 0.76944  | -0.95441 | -1.10474 |
| B  | 1.58594  | -0.26326 | 0.01551  |
| N  | 1.44982  | 1.31024  | -0.18350 |
| C  | 0.26495  | 1.99145  | -0.28231 |
| N  | 0.78193  | -0.61179 | 1.33276  |
| C  | -0.53819 | -0.22688 | 1.54301  |
| Co | -1.38064 | 0.75727  | -0.10270 |
| O  | -2.83758 | 1.63303  | -0.03993 |
| C  | -2.43091 | -2.09708 | -2.58845 |
| C  | -2.39898 | -2.37240 | -4.11257 |
| C  | -3.04284 | -3.30749 | -1.84364 |
| C  | -3.34476 | -0.87914 | -2.36092 |
| C  | -0.31189 | 4.50197  | -0.53791 |
| C  | 0.35281  | 5.87023  | -0.76399 |
| C  | -1.27333 | 4.20933  | -1.71497 |
| C  | -1.14052 | 4.54397  | 0.76933  |
| C  | -2.41345 | -1.18397 | 3.07752  |
| C  | -3.03601 | 0.22971  | 3.09452  |
| C  | -3.22736 | -2.07617 | 2.11006  |
| C  | -2.50329 | -1.75401 | 4.50934  |
| H  | -3.42593 | -2.51268 | -4.49445 |
| H  | -1.94928 | -1.51857 | -4.64795 |
| H  | -2.44727 | -4.22576 | -1.97296 |
| H  | -4.06212 | -3.51594 | -2.21524 |

|   |          |          |          |
|---|----------|----------|----------|
| H | -3.10525 | -3.09863 | -0.76285 |
| H | -2.95327 | 0.01092  | -2.87930 |
| H | -3.42682 | -0.60786 | -1.29739 |
| H | -4.35602 | -1.09437 | -2.74919 |
| H | 0.94335  | 5.89867  | -1.69451 |
| H | 1.00119  | 6.16753  | 0.07564  |
| H | -0.43463 | 6.63754  | -0.85290 |
| H | -0.71934 | 4.11448  | -2.66540 |
| H | -2.00028 | 5.03488  | -1.82028 |
| H | -0.48926 | 4.70693  | 1.64618  |
| H | -1.87387 | 5.36975  | 0.72660  |
| H | -1.68677 | 3.59331  | 0.88934  |
| H | -4.07459 | 0.17122  | 3.46686  |
| H | -2.46752 | 0.89704  | 3.76571  |
| H | -4.27787 | -2.16149 | 2.44221  |
| H | -3.21134 | -1.63958 | 1.09774  |
| H | -1.82360 | -1.22338 | 5.19821  |
| H | -2.28062 | -2.83000 | 4.55989  |
| H | -3.53171 | -1.62393 | 4.88720  |
| H | -1.82641 | -3.27449 | -4.37535 |
| H | -2.80292 | -3.09382 | 2.04863  |
| H | -1.82859 | 3.27714  | -1.52040 |
| C | 3.15115  | -0.64207 | 0.07555  |
| C | 3.87887  | -0.94424 | -1.09262 |
| C | 5.26255  | -1.16081 | -1.06523 |
| C | 5.96444  | -1.07673 | 0.14418  |
| C | 5.26519  | -0.77209 | 1.31909  |
| C | 3.88171  | -0.55661 | 1.27731  |
| H | 3.34374  | -1.02725 | -2.04302 |
| H | 5.79698  | -1.39732 | -1.99286 |
| H | 7.04670  | -1.24740 | 0.17094  |
| H | 5.80117  | -0.70066 | 2.27281  |
| H | 3.35372  | -0.32180 | 2.20665  |
| H | -3.04811 | 0.68501  | 2.09159  |
| N | 0.06064  | -1.94494 | 2.82064  |
| N | 2.03228  | 3.31509  | -0.39878 |
| N | 0.02531  | -2.71101 | -2.11207 |
| C | 0.22913  | -3.90301 | -2.89587 |
| H | -0.69783 | -4.48610 | -2.97612 |
| H | 0.59781  | -3.68056 | -3.91952 |
| H | 0.98584  | -4.52260 | -2.38755 |
| C | 3.02049  | 4.38460  | -0.49326 |
| H | 2.92266  | 4.92153  | -1.44648 |
| H | 2.90525  | 5.09271  | 0.33907  |
| H | 4.00999  | 3.91288  | -0.43779 |
| C | 0.16901  | -3.08612 | 3.70968  |
| H | 0.10861  | -2.78536 | 4.76753  |
| H | -0.62100 | -3.82502 | 3.50020  |
| H | 1.14751  | -3.54900 | 3.52294  |
| N | 1.14728  | -1.65743 | 2.08245  |
| N | 2.51490  | 2.09047  | -0.25294 |
| N | 1.15487  | -2.19149 | -1.53669 |
| C | -1.03879 | -1.79992 | -2.05339 |
| C | 0.65263  | 3.32529  | -0.42605 |
| C | -0.99089 | -1.08707 | 2.53602  |

[ $\text{LoCo}^{\text{II}}\text{OH}$ ] ( $S=1/2$ )

81

h\_u1.out Energy: -1900915.7125718

|    |          |          |          |
|----|----------|----------|----------|
| C  | 0.51273  | -0.51705 | 1.55500  |
| N  | -0.75678 | -1.00085 | 1.30450  |
| B  | -1.59708 | -0.60358 | 0.02372  |
| N  | -1.41247 | 0.94943  | -0.06841 |
| C  | -0.16128 | 1.50858  | -0.07271 |
| N  | -0.73485 | -1.15023 | -1.18465 |
| C  | 0.53414  | -0.67822 | -1.46058 |
| Co | 1.34727  | 0.36331  | 0.01464  |
| O  | 3.09662  | -0.33605 | -0.08719 |
| C  | 2.16787  | -1.01740 | 3.52905  |
| C  | 2.04885  | -1.25438 | 5.04934  |
| C  | 3.15199  | -2.03864 | 2.91128  |
| C  | 2.71699  | 0.41282  | 3.32906  |
| C  | 0.65766  | 3.96451  | -0.26096 |
| C  | 0.13555  | 5.41046  | -0.32182 |
| C  | 1.55294  | 3.82529  | 0.99337  |
| C  | 1.50490  | 3.69018  | -1.52683 |
| C  | 2.21573  | -1.33678 | -3.37570 |
| C  | 2.77639  | 0.09722  | -3.24156 |
| C  | 3.22122  | -2.32671 | -2.74219 |
| C  | 2.04794  | -1.63525 | -4.88217 |
| H  | 2.99967  | -0.97069 | 5.53064  |
| H  | 1.25078  | -0.63733 | 5.49644  |
| H  | 2.79076  | -3.07248 | 3.05007  |
| H  | 4.14696  | -1.95644 | 3.38374  |
| H  | 3.24706  | -1.84729 | 1.83034  |
| H  | 2.02631  | 1.16448  | 3.74699  |
| H  | 2.85291  | 0.64183  | 2.26272  |
| H  | 3.69265  | 0.51447  | 3.83383  |
| H  | -0.46092 | 5.67481  | 0.56600  |
| H  | -0.46594 | 5.60147  | -1.22407 |
| H  | 0.99705  | 6.09817  | -0.35390 |
| H  | 0.97519  | 4.01842  | 1.91335  |
| H  | 2.38933  | 4.54411  | 0.94902  |
| H  | 0.89369  | 3.79799  | -2.43927 |
| H  | 2.34818  | 4.40011  | -1.58739 |
| H  | 1.91336  | 2.66606  | -1.51423 |
| H  | 3.70816  | 0.18109  | -3.82811 |
| H  | 2.05827  | 0.84150  | -3.62675 |
| H  | 4.18412  | -2.29119 | -3.28342 |
| H  | 3.38861  | -2.04128 | -1.69038 |
| H  | 1.22651  | -1.04555 | -5.32516 |
| H  | 1.87144  | -2.69921 | -5.09722 |
| H  | 2.97796  | -1.35903 | -5.40665 |
| H  | 1.86714  | -2.30747 | 5.30785  |
| H  | 2.84574  | -3.36465 | -2.78761 |
| H  | 1.97589  | 2.81002  | 1.06835  |
| C  | -3.15219 | -0.99574 | 0.09071  |
| C  | -3.86164 | -0.77541 | 1.29187  |
| C  | -5.24026 | -0.99070 | 1.38703  |
| C  | -5.96097 | -1.43101 | 0.26912  |
| C  | -5.28556 | -1.64234 | -0.93741 |
| C  | -3.90341 | -1.42286 | -1.02192 |
| H  | -3.32460 | -0.42449 | 2.17827  |
| H  | -5.75624 | -0.81150 | 2.33697  |
| H  | -7.04071 | -1.60304 | 0.33849  |
| H  | -5.83679 | -1.97895 | -1.82267 |

|   |          |          |          |
|---|----------|----------|----------|
| H | -3.39915 | -1.59583 | -1.97507 |
| H | 3.00576  | 0.32546  | -2.19095 |
| H | 3.61659  | -0.26222 | 0.72589  |
| C | 0.91003  | -1.41501 | -2.59382 |
| C | -0.41698 | 2.88559  | -0.18609 |
| C | 0.85120  | -1.13157 | 2.77093  |
| C | -2.66173 | 4.16211  | -0.37708 |
| H | -2.51796 | 4.85132  | 0.46562  |
| H | -2.46288 | 4.68751  | -1.32111 |
| H | -3.69385 | 3.78929  | -0.37499 |
| C | -0.41861 | -2.88600 | 4.18813  |
| H | 0.41705  | -3.59753 | 4.24631  |
| H | -0.51316 | -2.34696 | 5.14104  |
| H | -1.34887 | -3.42971 | 3.97950  |
| C | -0.29234 | -3.34798 | -3.82368 |
| H | -0.43906 | -2.92382 | -4.82707 |
| H | 0.59058  | -4.00214 | -3.82416 |
| H | -1.17841 | -3.92884 | -3.53695 |
| N | -1.12555 | -2.12847 | -1.97898 |
| N | -1.18418 | -1.87347 | 2.19551  |
| N | -2.39646 | 1.82461  | -0.17376 |
| N | -1.79002 | 2.99839  | -0.24542 |
| N | -0.13002 | -2.29045 | -2.83144 |
| N | -0.21064 | -1.95486 | 3.08378  |

**[L<sub>0</sub>Co<sup>II</sup>OH] (S=3/2)**

81

h\_u3.out Energy: -1900917.9067340

|    |          |          |          |
|----|----------|----------|----------|
| C  | 0.58182  | -0.51305 | 1.47954  |
| N  | -0.74070 | -0.84960 | 1.30254  |
| B  | -1.57734 | -0.39769 | 0.02659  |
| N  | -1.40954 | 1.17368  | -0.08236 |
| C  | -0.21235 | 1.84483  | -0.14870 |
| N  | -0.72701 | -1.03189 | -1.15792 |
| C  | 0.59212  | -0.71701 | -1.43019 |
| Co | 1.37181  | 0.59630  | -0.04270 |
| O  | 3.17200  | 1.17294  | -0.11256 |
| C  | 2.38575  | -1.28742 | 3.15692  |
| C  | 2.55160  | -2.09276 | 4.45675  |
| C  | 3.31111  | -1.87986 | 2.06462  |
| C  | 2.81525  | 0.17574  | 3.41957  |
| C  | 0.40329  | 4.35001  | -0.22674 |
| C  | -0.22875 | 5.73606  | -0.43907 |
| C  | 1.16497  | 4.33646  | 1.12084  |
| C  | 1.41814  | 4.08503  | -1.36537 |
| C  | 2.32771  | -1.86014 | -3.02153 |
| C  | 3.07652  | -0.50996 | -3.01203 |
| C  | 3.09895  | -2.87077 | -2.13964 |
| C  | 2.28130  | -2.36373 | -4.48096 |
| H  | 3.59578  | -2.00497 | 4.80014  |
| H  | 1.90703  | -1.71167 | 5.26569  |
| H  | 3.00328  | -2.90469 | 1.79422  |
| H  | 4.35272  | -1.91721 | 2.43007  |
| H  | 3.28559  | -1.24886 | 1.16019  |
| H  | 2.15241  | 0.65957  | 4.15731  |

|   |          |          |          |
|---|----------|----------|----------|
| H | 2.78908  | 0.75479  | 2.48295  |
| H | 3.84719  | 0.20018  | 3.81147  |
| H | -0.89866 | 6.02533  | 0.38561  |
| H | -0.78815 | 5.79350  | -1.38725 |
| H | 0.57337  | 6.49145  | -0.48461 |
| H | 0.47868  | 4.49748  | 1.97000  |
| H | 1.93079  | 5.13186  | 1.13725  |
| H | 0.90955  | 4.02713  | -2.34312 |
| H | 2.15430  | 4.90713  | -1.40790 |
| H | 1.96315  | 3.14197  | -1.19322 |
| H | 4.07834  | -0.64567 | -3.45550 |
| H | 2.53455  | 0.24074  | -3.61289 |
| H | 4.11957  | -3.02546 | -2.53187 |
| H | 3.17505  | -2.49523 | -1.10537 |
| H | 1.61085  | -1.74321 | -5.10005 |
| H | 1.96531  | -3.41357 | -4.56708 |
| H | 3.29271  | -2.30157 | -4.91615 |
| H | 2.34702  | -3.16546 | 4.31568  |
| H | 2.59302  | -3.85164 | -2.11124 |
| H | 1.66722  | 3.36457  | 1.25965  |
| C | -3.13919 | -0.77220 | 0.02381  |
| C | -3.89361 | -0.85534 | 1.21138  |
| C | -5.27995 | -1.05582 | 1.19211  |
| C | -5.95826 | -1.17002 | -0.02662 |
| C | -5.23500 | -1.07149 | -1.22176 |
| C | -3.85025 | -0.87144 | -1.19052 |
| H | -3.39038 | -0.76386 | 2.17684  |
| H | -5.83321 | -1.11961 | 2.13586  |
| H | -7.04211 | -1.32860 | -0.04580 |
| H | -5.75291 | -1.14724 | -2.18446 |
| H | -3.31190 | -0.78955 | -2.13884 |
| H | 3.20039  | -0.10114 | -1.99852 |
| H | 3.39059  | 1.89576  | 0.49491  |
| C | 0.95125  | -1.65385 | -2.40324 |
| C | -0.58481 | 3.18810  | -0.20087 |
| C | 0.96951  | -1.26303 | 2.59074  |
| C | -2.93231 | 4.28811  | -0.16536 |
| H | -2.79201 | 4.93129  | 0.71436  |
| H | -2.82922 | 4.88717  | -1.07977 |
| H | -3.93082 | 3.83402  | -0.13272 |
| C | -0.36914 | -2.94785 | 4.03864  |
| H | 0.29337  | -3.81602 | 3.91991  |
| H | -0.19340 | -2.48132 | 5.01707  |
| H | -1.41497 | -3.27252 | 3.96778  |
| C | -0.37780 | -3.61562 | -3.44198 |
| H | -0.37556 | -3.32426 | -4.50187 |
| H | 0.40436  | -4.36694 | -3.26346 |
| H | -1.35655 | -4.03555 | -3.17689 |
| N | -1.17346 | -2.07553 | -1.83374 |
| N | -1.17991 | -1.73783 | 2.17698  |
| N | -2.46469 | 1.97372  | -0.08789 |
| N | -1.96383 | 3.19483  | -0.15639 |
| N | -0.15942 | -2.45318 | -2.58757 |
| N | -0.14502 | -1.98486 | 2.96331  |

[L<sub>0</sub>Co<sup>II</sup>OH] (S = 5/2)

h\_u5.out Energy: -1900860.9076644

|    |          |          |          |
|----|----------|----------|----------|
| C  | 0.54929  | -0.47076 | 1.44066  |
| N  | -0.78382 | -0.78280 | 1.28187  |
| B  | -1.62022 | -0.36979 | -0.02044 |
| N  | -1.45538 | 1.22045  | -0.11092 |
| C  | -0.26341 | 1.88499  | -0.21979 |
| N  | -0.81056 | -0.96318 | -1.18378 |
| C  | 0.54794  | -0.68369 | -1.42868 |
| Co | 1.32532  | 0.61402  | -0.12453 |
| O  | 3.00434  | 1.32360  | 0.03115  |
| C  | 2.40136  | -1.33029 | 3.04238  |
| C  | 2.58964  | -2.23683 | 4.27147  |
| C  | 3.32930  | -1.82833 | 1.90760  |
| C  | 2.80956  | 0.11007  | 3.43124  |
| C  | 0.36431  | 4.40079  | -0.35748 |
| C  | -0.27801 | 5.76620  | -0.66033 |
| C  | 1.08717  | 4.47102  | 1.00920  |
| C  | 1.40289  | 4.09496  | -1.46284 |
| C  | 2.40367  | -1.89939 | -2.82258 |
| C  | 3.31876  | -0.73993 | -2.39454 |
| C  | 3.00723  | -3.21647 | -2.27953 |
| C  | 2.36349  | -1.91862 | -4.37090 |
| H  | 3.63788  | -2.16569 | 4.60583  |
| H  | 1.95476  | -1.92846 | 5.11734  |
| H  | 3.02876  | -2.83156 | 1.56006  |
| H  | 4.37145  | -1.88441 | 2.26784  |
| H  | 3.30156  | -1.13746 | 1.05088  |
| H  | 2.15990  | 0.50371  | 4.23136  |
| H  | 2.73668  | 0.77909  | 2.56104  |
| H  | 3.85274  | 0.12420  | 3.79174  |
| H  | -0.95283 | 6.10464  | 0.14031  |
| H  | -0.83096 | 5.75838  | -1.61387 |
| H  | 0.52069  | 6.52095  | -0.74908 |
| H  | 0.37585  | 4.67755  | 1.82692  |
| H  | 1.84852  | 5.27019  | 1.00012  |
| H  | 0.91329  | 3.98800  | -2.44566 |
| H  | 2.13093  | 4.92201  | -1.52730 |
| H  | 1.95754  | 3.16960  | -1.24357 |
| H  | 4.31172  | -0.85491 | -2.86173 |
| H  | 2.90381  | 0.23429  | -2.69943 |
| H  | 4.02844  | -3.35916 | -2.67395 |
| H  | 3.06358  | -3.18258 | -1.17809 |
| H  | 1.93037  | -0.97976 | -4.75593 |
| H  | 1.77494  | -2.75431 | -4.77646 |
| H  | 3.38829  | -2.01212 | -4.77051 |
| H  | 2.39299  | -3.29622 | 4.04601  |
| H  | 2.41319  | -4.10060 | -2.56039 |
| H  | 1.58899  | 3.51382  | 1.22568  |
| C  | -3.18007 | -0.73695 | 0.05777  |
| C  | -3.89702 | -0.58795 | 1.26293  |
| C  | -5.27951 | -0.79609 | 1.32936  |
| C  | -5.99129 | -1.15509 | 0.17741  |
| C  | -5.30420 | -1.29838 | -1.03386 |
| C  | -3.91982 | -1.08944 | -1.08834 |
| H  | -3.36383 | -0.30218 | 2.17485  |
| H  | -5.80510 | -0.67516 | 2.28340  |
| H  | -7.07345 | -1.32031 | 0.22406  |
| H  | -5.84941 | -1.57554 | -1.94334 |
| H  | -3.39552 | -1.21991 | -2.03866 |

|   |          |          |          |
|---|----------|----------|----------|
| H | 3.46178  | -0.71125 | -1.30479 |
| H | 3.12591  | 1.97807  | 0.73850  |
| C | 1.01413  | -1.69422 | -2.24813 |
| C | -0.61386 | 3.23254  | -0.29430 |
| C | 0.97850  | -1.27747 | 2.49246  |
| C | -2.95670 | 4.34321  | -0.21056 |
| H | -2.78337 | 5.00188  | 0.65151  |
| H | -2.88878 | 4.92278  | -1.14037 |
| H | -3.95262 | 3.88932  | -0.13113 |
| C | -0.32869 | -3.03599 | 3.88534  |
| H | 0.32394  | -3.90049 | 3.70051  |
| H | -0.13306 | -2.63402 | 4.88856  |
| H | -1.37779 | -3.35093 | 3.81652  |
| C | -0.26841 | -3.61661 | -3.40409 |
| H | -0.65907 | -3.19688 | -4.35468 |
| H | 0.65178  | -4.17701 | -3.61381 |
| H | -1.01804 | -4.31928 | -3.00591 |
| N | -1.19054 | -2.14962 | -1.76807 |
| N | -1.19396 | -1.71376 | 2.12321  |
| N | -2.49464 | 2.02683  | -0.11168 |
| N | -1.99083 | 3.24689  | -0.21430 |
| N | -0.03737 | -2.59907 | -2.40800 |
| N | -0.12887 | -2.01115 | 2.86624  |

### 3. Thermodynamic cycle for the $L_2Co^{III}O$ oxidant

$[L_2Co^{III}O] (S=0)$

80

o\_u0.out Energy: -2143626.4757109

|    |          |          |          |
|----|----------|----------|----------|
| C  | -0.26240 | 1.53744  | -0.42487 |
| N  | -0.67666 | 2.76224  | -0.87604 |
| C  | 0.33713  | 3.30200  | -1.66631 |
| C  | 1.41193  | 2.42934  | -1.60629 |
| N  | 1.04679  | 1.39308  | -0.77319 |
| B  | 1.81034  | 0.06942  | -0.36714 |
| N  | 1.40682  | -0.22949 | 1.13361  |
| C  | 0.09631  | -0.29052 | 1.48394  |
| N  | 0.03018  | -0.54467 | 2.82421  |
| C  | 1.32878  | -0.66381 | 3.31801  |
| C  | 2.19042  | -0.45766 | 2.24981  |
| N  | 1.04263  | -0.99067 | -1.25334 |
| C  | -0.27114 | -1.24486 | -0.99646 |
| N  | -0.69498 | -2.18287 | -1.90101 |
| C  | 0.32283  | -2.38177 | -2.83254 |
| C  | 1.40546  | -1.61795 | -2.42644 |
| Co | -1.23481 | -0.01759 | 0.10032  |
| O  | -2.73257 | 0.13779  | -0.57752 |
| C  | -1.99251 | 3.46506  | -0.56442 |
| C  | -1.74798 | 4.98228  | -0.47242 |
| C  | -2.98075 | 3.12148  | -1.68518 |
| C  | -2.50902 | 2.99979  | 0.80427  |
| C  | -1.26942 | -0.77510 | 3.57063  |
| C  | -1.05956 | -0.69178 | 5.08681  |
| C  | -2.27081 | 0.31111  | 3.15488  |
| C  | -1.77445 | -2.17093 | 3.17955  |
| C  | -2.03365 | -2.91220 | -1.91199 |

|   |          |          |          |
|---|----------|----------|----------|
| C | -2.53954 | -3.06901 | -0.47065 |
| C | -3.00587 | -2.09201 | -2.76830 |
| C | -1.84200 | -4.32753 | -2.48601 |
| H | -2.66022 | 5.44811  | -0.06972 |
| H | -0.91669 | 5.21520  | 0.21367  |
| H | -2.60302 | 3.46557  | -2.66309 |
| H | -3.94226 | 3.62511  | -1.49224 |
| H | -3.14008 | 2.03144  | -1.70770 |
| H | -1.72876 | 3.10312  | 1.57604  |
| H | -2.85796 | 1.96369  | 0.77330  |
| H | -3.35998 | 3.63889  | 1.08648  |
| H | -0.59485 | 0.26111  | 5.38734  |
| H | -0.46472 | -1.52785 | 5.47930  |
| H | -2.04903 | -0.74797 | 5.56606  |
| H | -1.84796 | 1.31712  | 3.29993  |
| H | -3.17673 | 0.21814  | 3.77383  |
| H | -1.05295 | -2.94970 | 3.47694  |
| H | -2.73422 | -2.37324 | 3.68152  |
| H | -1.93146 | -2.23230 | 2.09362  |
| H | -3.42819 | -3.71898 | -0.48686 |
| H | -1.77483 | -3.54844 | 0.16196  |
| H | -3.98058 | -2.60588 | -2.80652 |
| H | -3.13755 | -1.09481 | -2.31792 |
| H | -1.01433 | -4.85903 | -1.98750 |
| H | -1.67756 | -4.33737 | -3.57058 |
| H | -2.76705 | -4.89454 | -2.30136 |
| H | -1.55635 | 5.45292  | -1.44461 |
| H | -2.62995 | -1.99151 | -3.80077 |
| H | -2.58367 | 0.20256  | 2.10614  |
| C | 3.40075  | 0.08995  | -0.47429 |
| C | 4.13304  | 1.25947  | -0.18516 |
| C | 5.52954  | 1.25908  | -0.15188 |
| C | 6.23297  | 0.07253  | -0.38692 |
| C | 5.52969  | -1.11181 | -0.63299 |
| C | 4.13315  | -1.09956 | -0.66349 |
| H | 3.60891  | 2.19272  | 0.04478  |
| H | 6.07001  | 2.18491  | 0.06943  |
| H | 7.32758  | 0.06721  | -0.36038 |
| H | 6.07030  | -2.05060 | -0.79000 |
| H | 3.60908  | -2.04868 | -0.81485 |
| H | -2.83504 | -2.10927 | -0.03330 |
| C | 0.29401  | 4.44613  | -2.50374 |
| N | 0.33863  | 5.34227  | -3.24547 |
| C | 2.59207  | 2.53146  | -2.39101 |
| N | 3.50461  | 2.66259  | -3.10067 |
| C | 2.59163  | -1.42042 | -3.18339 |
| N | 3.50794  | -1.27690 | -3.88578 |
| C | 0.28863  | -3.10913 | -4.05007 |
| N | 0.34847  | -3.64627 | -5.08109 |
| C | 3.60581  | -0.49172 | 2.37379  |
| N | 4.73680  | -0.55402 | 2.64265  |
| C | 1.77372  | -0.94011 | 4.63652  |
| N | 2.23575  | -1.16610 | 5.68079  |

[L<sub>2</sub>Co<sup>III</sup>O] (S=1)



80

o\_u2.out Energy: -2143627.2360955

|    |          |          |          |
|----|----------|----------|----------|
| C  | -0.27897 | 1.64888  | -0.31582 |
| N  | -0.66800 | 2.84121  | -0.83869 |
| C  | 0.32395  | 3.29866  | -1.70447 |
| C  | 1.36745  | 2.38814  | -1.63803 |
| N  | 1.00329  | 1.41236  | -0.72935 |
| B  | 1.75639  | 0.06308  | -0.33858 |
| N  | 1.38698  | -0.23806 | 1.17149  |
| C  | 0.08860  | -0.30635 | 1.55682  |
| N  | 0.04410  | -0.56398 | 2.88951  |
| C  | 1.35168  | -0.67192 | 3.36200  |
| C  | 2.19228  | -0.46294 | 2.27651  |
| N  | 1.00184  | -1.02834 | -1.22104 |
| C  | -0.28024 | -1.40820 | -0.93180 |
| N  | -0.67318 | -2.29363 | -1.88534 |
| C  | 0.31544  | -2.36973 | -2.86470 |
| C  | 1.36102  | -1.56183 | -2.44469 |
| Co | -1.21498 | -0.03225 | 0.14007  |
| O  | -2.66067 | 0.12309  | -0.62918 |
| C  | -1.97036 | 3.56416  | -0.55780 |
| C  | -1.66962 | 5.05532  | -0.32401 |
| C  | -2.89133 | 3.33777  | -1.76509 |
| C  | -2.60747 | 3.00185  | 0.71803  |
| C  | -1.26444 | -0.75250 | 3.62906  |
| C  | -1.04034 | -0.88801 | 5.13691  |
| C  | -2.13640 | 0.48180  | 3.35863  |
| C  | -1.91497 | -2.02994 | 3.07915  |
| C  | -1.98125 | -3.05958 | -1.91210 |
| C  | -2.59198 | -3.07955 | -0.50609 |
| C  | -2.91343 | -2.34364 | -2.89953 |
| C  | -1.69992 | -4.51427 | -2.32823 |
| H  | -2.60196 | 5.55180  | -0.01337 |
| H  | -0.92745 | 5.18342  | 0.48137  |
| H  | -2.45454 | 3.74747  | -2.69093 |
| H  | -3.85575 | 3.84212  | -1.59145 |
| H  | -3.06815 | 2.25716  | -1.88751 |
| H  | -1.90325 | 3.03587  | 1.56439  |
| H  | -2.95066 | 1.97134  | 0.56632  |
| H  | -3.47928 | 3.62677  | 0.96744  |
| H  | -0.53687 | -0.00607 | 5.56267  |
| H  | -0.47358 | -1.79374 | 5.39718  |
| H  | -2.02821 | -0.97121 | 5.61595  |
| H  | -1.62941 | 1.40225  | 3.69008  |
| H  | -3.08657 | 0.38398  | 3.90636  |
| H  | -1.27788 | -2.90833 | 3.27327  |
| H  | -2.89099 | -2.18822 | 3.56446  |
| H  | -2.07792 | -1.95363 | 1.99441  |
| H  | -3.48431 | -3.72456 | -0.53074 |
| H  | -1.88382 | -3.49815 | 0.22665  |
| H  | -3.87871 | -2.87369 | -2.94442 |
| H  | -3.08475 | -1.31225 | -2.55225 |
| H  | -0.93798 | -4.96983 | -1.67412 |
| H  | -1.37946 | -4.61491 | -3.37346 |
| H  | -2.63182 | -5.09079 | -2.22122 |
| H  | -1.31347 | 5.57568  | -1.22291 |
| H  | -2.48682 | -2.32612 | -3.91631 |
| H  | -2.38017 | 0.58601  | 2.29095  |
| C  | 3.34583  | 0.09043  | -0.47453 |

|   |          |          |          |
|---|----------|----------|----------|
| C | 4.07766  | 1.26330  | -0.19837 |
| C | 5.47451  | 1.26950  | -0.19438 |
| C | 6.17846  | 0.08705  | -0.44818 |
| C | 5.47606  | -1.09961 | -0.68609 |
| C | 4.07916  | -1.09437 | -0.68763 |
| H | 3.55211  | 2.19398  | 0.03959  |
| H | 6.01539  | 2.19736  | 0.01732  |
| H | 7.27340  | 0.08709  | -0.44497 |
| H | 6.01828  | -2.03435 | -0.86089 |
| H | 3.55493  | -2.04355 | -0.83957 |
| H | -2.90123 | -2.07522 | -0.19121 |
| C | 0.27069  | 4.41462  | -2.57758 |
| N | 0.27391  | 5.29736  | -3.33678 |
| C | 2.52542  | 2.42110  | -2.46170 |
| N | 3.41921  | 2.50105  | -3.20213 |
| C | 2.51541  | -1.26324 | -3.21828 |
| N | 3.40584  | -1.04034 | -3.93311 |
| C | 0.25907  | -3.04380 | -4.11090 |
| N | 0.26202  | -3.54795 | -5.16039 |
| C | 3.60982  | -0.49264 | 2.37129  |
| N | 4.74635  | -0.55202 | 2.61626  |
| C | 1.81080  | -0.93585 | 4.67792  |
| N | 2.27388  | -1.14814 | 5.72444  |

[L<sub>2</sub>Co<sup>III</sup>O] (S=4)

80

o\_u4.out Energy: -2143619.5840003

|    |          |          |          |
|----|----------|----------|----------|
| C  | -0.30040 | 1.67731  | -0.39053 |
| N  | -0.65952 | 2.83026  | -1.01361 |
| C  | 0.39561  | 3.26722  | -1.80753 |
| C  | 1.43587  | 2.36785  | -1.61768 |
| N  | 1.00562  | 1.43169  | -0.69200 |
| B  | 1.72183  | 0.08492  | -0.23000 |
| N  | 1.35478  | -0.21530 | 1.31069  |
| C  | 0.08221  | -0.33742 | 1.77383  |
| N  | 0.12151  | -0.62846 | 3.09452  |
| C  | 1.44885  | -0.69778 | 3.49748  |
| C  | 2.22307  | -0.43013 | 2.37415  |
| N  | 0.98316  | -0.98334 | -1.15599 |
| C  | -0.33325 | -1.28816 | -0.97579 |
| N  | -0.70113 | -2.13666 | -1.97175 |
| C  | 0.36252  | -2.29221 | -2.85526 |
| C  | 1.41494  | -1.54341 | -2.34708 |
| Co | -1.36055 | 0.00292  | 0.35909  |
| O  | -3.03640 | 0.01912  | 0.17418  |
| C  | -2.04024 | 3.45079  | -0.88637 |
| C  | -1.99734 | 4.93739  | -1.26306 |
| C  | -2.97837 | 2.67893  | -1.82531 |
| C  | -2.48749 | 3.33029  | 0.57983  |
| C  | -1.13763 | -0.93334 | 3.88782  |
| C  | -0.84082 | -0.97395 | 5.38992  |
| C  | -2.16885 | 0.17318  | 3.60943  |
| C  | -1.64689 | -2.30364 | 3.41225  |
| C  | -2.09606 | -2.72722 | -2.08718 |
| C  | -2.55030 | -3.16400 | -0.68404 |
| C  | -3.00949 | -1.63548 | -2.66285 |
| C  | -2.08713 | -3.95882 | -3.00151 |

|   |          |          |          |
|---|----------|----------|----------|
| H | -2.97032 | 5.38033  | -1.00063 |
| H | -1.21844 | 5.48083  | -0.70320 |
| H | -2.62705 | 2.74334  | -2.86879 |
| H | -3.98833 | 3.11749  | -1.77284 |
| H | -3.03934 | 1.62430  | -1.51693 |
| H | -1.74442 | 3.78470  | 1.25546  |
| H | -2.65611 | 2.28557  | 0.87001  |
| H | -3.44194 | 3.86707  | 0.69973  |
| H | -0.39736 | -0.03128 | 5.74841  |
| H | -0.18843 | -1.81355 | 5.66862  |
| H | -1.79574 | -1.11694 | 5.91855  |
| H | -1.73574 | 1.17059  | 3.78863  |
| H | -3.02502 | 0.03729  | 4.28890  |
| H | -0.90524 | -3.09186 | 3.62310  |
| H | -2.58070 | -2.55251 | 3.94153  |
| H | -1.85269 | -2.29866 | 2.33048  |
| H | -3.51666 | -3.68494 | -0.77509 |
| H | -1.82162 | -3.85864 | -0.23486 |
| H | -4.03032 | -2.03613 | -2.77482 |
| H | -3.04599 | -0.77320 | -1.98047 |
| H | -1.33441 | -4.70053 | -2.68744 |
| H | -1.92770 | -3.70317 | -4.05793 |
| H | -3.07686 | -4.43583 | -2.93258 |
| H | -1.85152 | 5.09984  | -2.33956 |
| H | -2.65353 | -1.31231 | -3.65548 |
| H | -2.55904 | 0.13004  | 2.58153  |
| C | 3.31648  | 0.08604  | -0.33484 |
| C | 4.06817  | 1.25506  | -0.09860 |
| C | 5.46450  | 1.23872  | -0.09641 |
| C | 6.14892  | 0.03667  | -0.30682 |
| C | 5.42756  | -1.14716 | -0.49630 |
| C | 4.03161  | -1.11879 | -0.49749 |
| H | 3.55939  | 2.20141  | 0.11121  |
| H | 6.02040  | 2.16458  | 0.08201  |
| H | 7.24370  | 0.01936  | -0.30461 |
| H | 5.95408  | -2.09694 | -0.63339 |
| H | 3.49183  | -2.06472 | -0.61073 |
| H | -2.69905 | -2.30499 | -0.01709 |
| C | 0.45942  | 4.36671  | -2.70266 |
| N | 0.59800  | 5.23246  | -3.46813 |
| C | 2.63909  | 2.37898  | -2.37471 |
| N | 3.56080  | 2.44610  | -3.08175 |
| C | 2.63399  | -1.31827 | -3.04279 |
| N | 3.56925  | -1.15799 | -3.71634 |
| C | 0.42953  | -3.01202 | -4.07661 |
| N | 0.57403  | -3.56109 | -5.09267 |
| C | 3.64304  | -0.39674 | 2.44287  |
| N | 4.77541  | -0.41042 | 2.71381  |
| C | 1.98965  | -0.97010 | 4.78155  |
| N | 2.51530  | -1.18557 | 5.79714  |

**[L<sub>2</sub>Co<sup>III</sup>OH]<sup>+</sup> (S=0)**

81

p\_u0.out Energy: -2143915.9133867

|   |          |          |          |
|---|----------|----------|----------|
| C | -0.28413 | -1.23490 | -1.12972 |
| N | -0.89801 | -2.31189 | -1.68081 |

|    |          |          |          |
|----|----------|----------|----------|
| C  | 0.07460  | -3.27801 | -1.92006 |
| C  | 1.27396  | -2.78046 | -1.43205 |
| N  | 1.03303  | -1.49743 | -0.97110 |
| B  | 1.80473  | -0.52769 | 0.02651  |
| N  | 1.56151  | 0.93980  | -0.52318 |
| C  | 0.32320  | 1.46864  | -0.62017 |
| N  | 0.41562  | 2.77954  | -0.97348 |
| C  | 1.76748  | 3.05049  | -1.19447 |
| C  | 2.48129  | 1.90428  | -0.89397 |
| N  | 0.87709  | -0.67080 | 1.32186  |
| C  | -0.41935 | -0.24009 | 1.30426  |
| N  | -0.97295 | -0.55132 | 2.50948  |
| C  | -0.04267 | -1.27294 | 3.25583  |
| C  | 1.10850  | -1.36411 | 2.49117  |
| Co | -1.12110 | 0.30240  | -0.46734 |
| O  | -1.80778 | 0.82297  | -2.05903 |
| C  | -2.40370 | -2.49285 | -1.81020 |
| C  | -2.77670 | -3.96819 | -1.59869 |
| C  | -3.04189 | -1.68724 | -0.67245 |
| C  | -2.84571 | -2.00148 | -3.19212 |
| C  | -0.65886 | 3.87224  | -1.05016 |
| C  | -0.13828 | 5.10296  | -0.28174 |
| C  | -0.91103 | 4.17351  | -2.53250 |
| C  | -1.95301 | 3.42991  | -0.36300 |
| C  | -2.33190 | -0.14524 | 3.05640  |
| C  | -3.05456 | 0.75121  | 2.05321  |
| C  | -3.15964 | -1.41280 | 3.32016  |
| C  | -2.09608 | 0.66650  | 4.34376  |
| H  | -3.86990 | -4.02530 | -1.48368 |
| H  | -2.51338 | -4.59857 | -2.45761 |
| H  | -2.64858 | -2.00073 | 0.30484  |
| H  | -4.13106 | -1.84618 | -0.66510 |
| H  | -2.94222 | -0.59727 | -0.83015 |
| H  | -2.33037 | -2.56506 | -3.98671 |
| H  | -2.63438 | -0.92854 | -3.30062 |
| H  | -3.92995 | -2.16400 | -3.30242 |
| H  | 0.71687  | 5.59549  | -0.76044 |
| H  | 0.13498  | 4.83153  | 0.75099  |
| H  | -0.94894 | 5.84608  | -0.23800 |
| H  | 0.00339  | 4.50466  | -3.04954 |
| H  | -1.65629 | 4.98045  | -2.61402 |
| H  | -1.75945 | 3.11513  | 0.67450  |
| H  | -2.62511 | 4.29991  | -0.31782 |
| H  | -2.47243 | 2.63964  | -0.91777 |
| H  | -4.02008 | 1.05248  | 2.48622  |
| H  | -2.48283 | 1.66680  | 1.84931  |
| H  | -4.14848 | -1.11763 | 3.70436  |
| H  | -3.31055 | -1.98819 | 2.39357  |
| H  | -1.45365 | 1.53832  | 4.13927  |
| H  | -1.64140 | 0.07104  | 5.14800  |
| H  | -3.06690 | 1.03043  | 4.71465  |
| H  | -2.31714 | -4.38040 | -0.68560 |
| H  | -2.69646 | -2.07111 | 4.06934  |
| H  | -1.30852 | 3.27938  | -3.03657 |
| C  | 3.36135  | -0.73005 | 0.26105  |
| C  | 4.21596  | -1.23050 | -0.73912 |
| C  | 5.59900  | -1.29658 | -0.55365 |
| C  | 6.16719  | -0.82613 | 0.63465  |
| C  | 5.34644  | -0.26882 | 1.62224  |

|   |          |          |          |
|---|----------|----------|----------|
| C | 3.96470  | -0.21582 | 1.43017  |
| H | 3.81255  | -1.53685 | -1.70692 |
| H | 6.23530  | -1.69946 | -1.34757 |
| H | 7.25089  | -0.87298 | 0.78245  |
| H | 5.78477  | 0.13090  | 2.54191  |
| H | 3.35024  | 0.25275  | 2.20626  |
| H | -3.28057 | 0.23368  | 1.11067  |
| H | -1.18006 | 0.91860  | -2.79505 |
| C | 2.33752  | 4.23410  | -1.73105 |
| N | 2.87294  | 5.15261  | -2.20365 |
| C | 3.89635  | 1.81634  | -0.99468 |
| N | 5.04543  | 1.92278  | -1.14229 |
| C | 2.46655  | -3.54955 | -1.36130 |
| N | 3.36352  | -4.28870 | -1.32433 |
| C | 2.24488  | -2.15021 | 2.82838  |
| N | 3.10086  | -2.85974 | 3.16893  |
| C | -0.07643 | -4.51860 | -2.59176 |
| N | -0.11332 | -5.53369 | -3.15838 |
| C | -0.22895 | -1.85258 | 4.53666  |
| N | -0.33203 | -2.35408 | 5.58159  |

[L<sub>2</sub>Co<sup>III</sup>OH]<sup>+</sup> (S=1)

81

p\_u2.out Energy: -2143907.9247456

|    |          |          |          |
|----|----------|----------|----------|
| C  | -0.43785 | -1.40746 | -1.00493 |
| N  | -0.97821 | -2.55036 | -1.49589 |
| C  | 0.01392  | -3.52480 | -1.52276 |
| C  | 1.16905  | -2.94202 | -1.01808 |
| N  | 0.88146  | -1.61322 | -0.75913 |
| B  | 1.72343  | -0.50405 | 0.02854  |
| N  | 1.47224  | 0.95193  | -0.60362 |
| C  | 0.28363  | 1.60337  | -0.52298 |
| N  | 0.44757  | 2.89248  | -0.90150 |
| C  | 1.77454  | 3.05085  | -1.30291 |
| C  | 2.41250  | 1.83834  | -1.11088 |
| N  | 0.92004  | -0.49460 | 1.40612  |
| C  | -0.38634 | -0.12708 | 1.39048  |
| N  | -0.92520 | -0.39751 | 2.60393  |
| C  | 0.05291  | -0.99467 | 3.39567  |
| C  | 1.20203  | -1.08031 | 2.62326  |
| Co | -1.18477 | 0.37186  | -0.35424 |
| O  | -1.97106 | 0.85261  | -1.87171 |
| C  | -2.41468 | -2.68088 | -1.99238 |
| C  | -2.83120 | -4.15437 | -2.06479 |
| C  | -3.34042 | -1.96406 | -0.99990 |
| C  | -2.47132 | -2.03391 | -3.38369 |
| C  | -0.54120 | 4.05213  | -0.82097 |
| C  | 0.09708  | 5.14661  | 0.05459  |
| C  | -0.82392 | 4.54506  | -2.24785 |
| C  | -1.84250 | 3.60565  | -0.15407 |
| C  | -2.35704 | -0.17133 | 3.04521  |
| C  | -3.12564 | 0.53217  | 1.92762  |
| C  | -2.99048 | -1.54393 | 3.32555  |
| C  | -2.34833 | 0.73171  | 4.28906  |
| H  | -3.90583 | -4.18523 | -2.30037 |
| H  | -2.31481 | -4.70160 | -2.86468 |
| H  | -3.16959 | -2.31754 | 0.02893  |

|   |          |          |          |
|---|----------|----------|----------|
| H | -4.38513 | -2.18402 | -1.26722 |
| H | -3.23645 | -0.87208 | -1.05614 |
| H | -1.78987 | -2.54698 | -4.08177 |
| H | -2.20379 | -0.96869 | -3.32251 |
| H | -3.49700 | -2.11618 | -3.77832 |
| H | 0.99927  | 5.58716  | -0.39158 |
| H | 0.35000  | 4.74698  | 1.05011  |
| H | -0.63275 | 5.96074  | 0.18376  |
| H | 0.08332  | 4.89828  | -2.76008 |
| H | -1.52949 | 5.38924  | -2.19994 |
| H | -1.65972 | 3.22802  | 0.86435  |
| H | -2.49860 | 4.48488  | -0.06904 |
| H | -2.37479 | 2.84727  | -0.74394 |
| H | -4.17856 | 0.63385  | 2.23091  |
| H | -2.74616 | 1.54780  | 1.74354  |
| H | -4.04350 | -1.39979 | 3.61303  |
| H | -2.95828 | -2.17941 | 2.42598  |
| H | -1.83335 | 1.68225  | 4.07530  |
| H | -1.86857 | 0.25382  | 5.15515  |
| H | -3.38913 | 0.95526  | 4.57082  |
| H | -2.68340 | -4.67538 | -1.10509 |
| H | -2.49184 | -2.07568 | 4.14916  |
| H | -1.28512 | 3.75073  | -2.85699 |
| C | 3.29451  | -0.71919 | 0.12892  |
| C | 4.03743  | -1.34987 | -0.88736 |
| C | 5.43048  | -1.43289 | -0.82940 |
| C | 6.12075  | -0.85346 | 0.24012  |
| C | 5.41130  | -0.17141 | 1.23571  |
| C | 4.01855  | -0.09960 | 1.17111  |
| H | 3.53429  | -1.75322 | -1.77040 |
| H | 5.97912  | -1.93586 | -1.63150 |
| H | 7.21280  | -0.91401 | 0.28715  |
| H | 5.94473  | 0.31069  | 2.06075  |
| H | 3.49011  | 0.46707  | 1.94524  |
| H | -3.14008 | -0.06120 | 0.99783  |
| H | -1.47972 | 1.41968  | -2.49132 |
| C | 2.37204  | 4.21594  | -1.84876 |
| N | 2.90433  | 5.13892  | -2.31617 |
| C | 3.78084  | 1.63413  | -1.43818 |
| N | 4.89066  | 1.64964  | -1.78701 |
| C | 2.33827  | -3.68474 | -0.69654 |
| N | 3.21021  | -4.40500 | -0.42531 |
| C | 2.39107  | -1.75473 | 3.01437  |
| N | 3.29923  | -2.36280 | 3.41090  |
| C | -0.05655 | -4.88011 | -1.94066 |
| N | -0.00095 | -5.99637 | -2.26289 |
| C | -0.09421 | -1.46114 | 4.72657  |
| N | -0.17037 | -1.86158 | 5.81627  |

[L<sub>2</sub>Co<sup>III</sup>OH]<sup>+</sup> (S=2)

81

p\_u4.out Energy: -2143896.7746177

|   |          |          |          |
|---|----------|----------|----------|
| C | -0.42940 | -1.26297 | -1.05705 |
| N | -0.93528 | -2.35233 | -1.68313 |
| C | -0.06806 | -3.42106 | -1.47842 |
| C | 1.01876  | -2.92863 | -0.76997 |
| N | 0.80060  | -1.57579 | -0.57814 |

|    |          |          |          |
|----|----------|----------|----------|
| B  | 1.65727  | -0.52243 | 0.24810  |
| N  | 1.42697  | 0.92283  | -0.42641 |
| C  | 0.21107  | 1.51613  | -0.57345 |
| N  | 0.36878  | 2.71095  | -1.18117 |
| C  | 1.71778  | 2.88470  | -1.45767 |
| C  | 2.38036  | 1.76125  | -0.97998 |
| N  | 0.91510  | -0.54131 | 1.65717  |
| C  | -0.34313 | -0.05614 | 1.80774  |
| N  | -0.73805 | -0.27417 | 3.08683  |
| C  | 0.25104  | -1.00695 | 3.73425  |
| C  | 1.28429  | -1.18409 | 2.82462  |
| Co | -1.32312 | 0.32726  | -0.00738 |
| O  | -3.07575 | 0.07466  | 0.10569  |
| C  | -2.22084 | -2.39259 | -2.49797 |
| C  | -1.99720 | -3.27083 | -3.74069 |
| C  | -3.32716 | -2.95191 | -1.59421 |
| C  | -2.55443 | -0.97226 | -2.97695 |
| C  | -0.71964 | 3.70783  | -1.53234 |
| C  | -0.36257 | 5.06077  | -0.89329 |
| C  | -0.80381 | 3.78878  | -3.06471 |
| C  | -2.05667 | 3.23458  | -0.96186 |
| C  | -2.06674 | 0.18138  | 3.67833  |
| C  | -2.43138 | 1.53835  | 3.05885  |
| C  | -3.11153 | -0.89287 | 3.34621  |
| C  | -1.93225 | 0.36659  | 5.19668  |
| H  | -2.87802 | -3.17032 | -4.39289 |
| H  | -1.11201 | -2.93912 | -4.30786 |
| H  | -3.08159 | -3.96822 | -1.24444 |
| H  | -4.26963 | -3.00472 | -2.16251 |
| H  | -3.47842 | -2.29387 | -0.72378 |
| H  | -1.69485 | -0.50575 | -3.48459 |
| H  | -2.88924 | -0.32886 | -2.15610 |
| H  | -3.38551 | -1.03960 | -3.69558 |
| H  | 0.55417  | 5.50092  | -1.30991 |
| H  | -0.24462 | 4.95653  | 0.19754  |
| H  | -1.18317 | 5.76882  | -1.08724 |
| H  | 0.13342  | 4.14927  | -3.51523 |
| H  | -1.60122 | 4.49513  | -3.34398 |
| H  | -2.03097 | 3.17083  | 0.13740  |
| H  | -2.82348 | 3.97821  | -1.22766 |
| H  | -2.38184 | 2.27923  | -1.40169 |
| H  | -3.31302 | 1.93665  | 3.58385  |
| H  | -1.60672 | 2.26131  | 3.16400  |
| H  | -4.08181 | -0.59962 | 3.77857  |
| H  | -3.23277 | -0.99474 | 2.25699  |
| H  | -1.07235 | 1.00556  | 5.45633  |
| H  | -1.85686 | -0.58489 | 5.73850  |
| H  | -2.84440 | 0.86637  | 5.55652  |
| H  | -1.89575 | -4.33787 | -3.50515 |
| H  | -2.82378 | -1.86667 | 3.77570  |
| H  | -1.04600 | 2.80145  | -3.49085 |
| C  | 3.22485  | -0.78772 | 0.31590  |
| C  | 3.91981  | -1.45754 | -0.71067 |
| C  | 5.30887  | -1.59788 | -0.67753 |
| C  | 6.04196  | -1.04713 | 0.37949  |
| C  | 5.38015  | -0.34148 | 1.39060  |
| C  | 3.99143  | -0.20786 | 1.34987  |
| H  | 3.37919  | -1.85758 | -1.57380 |
| H  | 5.82219  | -2.12789 | -1.48572 |

|   |          |          |          |
|---|----------|----------|----------|
| H | 7.13106  | -1.15440 | 0.40698  |
| H | 5.94843  | 0.11235  | 2.20833  |
| H | 3.50015  | 0.37419  | 2.13712  |
| H | -2.70534 | 1.44310  | 2.00272  |
| H | -3.84550 | 0.63557  | -0.09584 |
| C | 2.32076  | 3.98018  | -2.12746 |
| N | 2.85377  | 4.85242  | -2.68292 |
| C | 3.78793  | 1.60172  | -1.10816 |
| N | 4.93072  | 1.66130  | -1.31957 |
| C | 2.06908  | -3.71987 | -0.23040 |
| N | 2.86072  | -4.44247 | 0.22068  |
| C | 2.42984  | -1.99345 | 3.05760  |
| N | 3.29903  | -2.71450 | 3.33513  |
| C | -0.26917 | -4.78500 | -1.81444 |
| N | -0.38281 | -5.92330 | -2.02623 |
| C | 0.24351  | -1.56194 | 5.04077  |
| N | 0.32081  | -2.07379 | 6.08247  |

[L<sub>2</sub>Co<sup>II</sup>O]<sup>-</sup> (S=1/2)

80

r\_u1.out Energy: -2143705.5983735

|    |          |          |          |
|----|----------|----------|----------|
| C  | -0.32571 | -0.80337 | -1.37338 |
| N  | -0.81404 | -1.64355 | -2.34940 |
| C  | 0.06008  | -2.71584 | -2.51640 |
| C  | 1.16051  | -2.46687 | -1.70777 |
| N  | 0.94338  | -1.25825 | -1.07971 |
| B  | 1.76445  | -0.56092 | 0.07926  |
| N  | 1.57284  | 0.99361  | -0.09362 |
| C  | 0.30273  | 1.50176  | -0.15053 |
| N  | 0.42286  | 2.86607  | -0.29927 |
| C  | 1.77416  | 3.20412  | -0.33464 |
| C  | 2.49104  | 2.02023  | -0.20401 |
| N  | 0.94738  | -0.98394 | 1.36643  |
| C  | -0.31842 | -0.46987 | 1.55770  |
| N  | -0.80633 | -1.07398 | 2.69488  |
| C  | 0.06365  | -2.08839 | 3.08936  |
| C  | 1.16179  | -2.02775 | 2.24234  |
| Co | -1.16203 | 0.28758  | -0.01319 |
| O  | -2.77606 | -0.28593 | 0.05727  |
| C  | -2.11790 | -1.48099 | -3.09369 |
| C  | -1.92027 | -1.88659 | -4.56581 |
| C  | -3.16182 | -2.35453 | -2.38307 |
| C  | -2.54962 | -0.00910 | -3.06128 |
| C  | -0.78135 | 3.76816  | -0.40987 |
| C  | -0.37739 | 5.23817  | -0.55336 |
| C  | -1.57611 | 3.33670  | -1.65254 |
| C  | -1.61677 | 3.59676  | 0.86863  |
| C  | -2.10521 | -0.74391 | 3.39050  |
| C  | -2.53288 | 0.68513  | 3.03133  |
| C  | -3.15655 | -1.74965 | 2.89906  |
| C  | -1.89897 | -0.81126 | 4.91482  |
| H  | -2.83403 | -1.62490 | -5.12222 |
| H  | -1.07697 | -1.33613 | -5.01657 |
| H  | -2.86212 | -3.41692 | -2.38447 |
| H  | -4.13269 | -2.27178 | -2.90056 |
| H  | -3.26040 | -1.97922 | -1.34850 |



|   |          |          |          |
|---|----------|----------|----------|
| H | -1.75546 | 0.64607  | -3.45524 |
| H | -2.80116 | 0.28372  | -2.03118 |
| H | -3.44102 | 0.10086  | -3.70073 |
| H | 0.20690  | 5.42539  | -1.46722 |
| H | 0.18531  | 5.60474  | 0.31901  |
| H | -1.30103 | 5.83381  | -0.62480 |
| H | -0.96263 | 3.44186  | -2.56294 |
| H | -2.47267 | 3.96901  | -1.75676 |
| H | -1.02738 | 3.87214  | 1.75903  |
| H | -2.50535 | 4.24671  | 0.81900  |
| H | -1.95367 | 2.55594  | 0.97965  |
| H | -3.41720 | 0.94125  | 3.63793  |
| H | -1.73269 | 1.40850  | 3.25841  |
| H | -4.12268 | -1.55102 | 3.39342  |
| H | -3.26395 | -1.61262 | 1.80768  |
| H | -1.05235 | -0.17605 | 5.22635  |
| H | -1.73582 | -1.82974 | 5.29152  |
| H | -2.80909 | -0.43035 | 5.40433  |
| H | -1.75743 | -2.96329 | -4.70710 |
| H | -2.85861 | -2.78638 | 3.13352  |
| H | -1.89702 | 2.28861  | -1.56565 |
| C | 3.33483  | -0.87575 | 0.11023  |
| C | 4.06449  | -1.05428 | -1.08221 |
| C | 5.45352  | -1.20605 | -1.07728 |
| C | 6.15603  | -1.16320 | 0.13233  |
| C | 5.46044  | -0.95139 | 1.32807  |
| C | 4.07129  | -0.80090 | 1.30928  |
| H | 3.54120  | -1.05893 | -2.04421 |
| H | 5.99094  | -1.34894 | -2.02063 |
| H | 7.24496  | -1.28024 | 0.14159  |
| H | 6.00341  | -0.89371 | 2.27727  |
| H | 3.55382  | -0.60270 | 2.25381  |
| H | -2.79380 | 0.73879  | 1.96406  |
| C | 2.38951  | 4.47391  | -0.47067 |
| N | 2.97546  | 5.47543  | -0.57760 |
| C | 3.91111  | 1.97613  | -0.19451 |
| N | 5.06947  | 2.10145  | -0.20317 |
| C | 2.22843  | -3.38125 | -1.50449 |
| N | 3.04717  | -4.19823 | -1.36841 |
| C | -0.13550 | -3.90946 | -3.25393 |
| N | -0.24644 | -4.92471 | -3.81624 |
| C | 2.22510  | -2.96959 | 2.24039  |
| N | 3.04072  | -3.79981 | 2.28299  |
| C | -0.13349 | -3.08927 | 4.07237  |
| N | -0.24682 | -3.95481 | 4.84517  |

[L<sub>2</sub>Co<sup>II</sup>O] (S = 3/2)

80

r\_u3.out Energy: -2143706.4960007

|   |          |          |          |
|---|----------|----------|----------|
| C | -0.35018 | -0.85301 | -1.37880 |
| N | -0.82243 | -1.75936 | -2.29143 |
| C | 0.13407  | -2.74806 | -2.50433 |
| C | 1.23989  | -2.40322 | -1.73699 |
| N | 0.95203  | -1.20445 | -1.10729 |
| B | 1.74677  | -0.47103 | 0.06370  |

|    |          |          |          |
|----|----------|----------|----------|
| N  | 1.55660  | 1.10942  | -0.08627 |
| C  | 0.31799  | 1.69819  | -0.16463 |
| N  | 0.50769  | 3.04177  | -0.31100 |
| C  | 1.87257  | 3.31704  | -0.32154 |
| C  | 2.52732  | 2.09948  | -0.17826 |
| N  | 0.93883  | -0.97376 | 1.34179  |
| C  | -0.35475 | -0.55454 | 1.53987  |
| N  | -0.83072 | -1.23599 | 2.62908  |
| C  | 0.11207  | -2.17435 | 3.03880  |
| C  | 1.21419  | -2.02025 | 2.20576  |
| Co | -1.18998 | 0.41776  | -0.03240 |
| O  | -2.85563 | 0.84574  | -0.06481 |
| C  | -2.24048 | -1.71420 | -2.81302 |
| C  | -2.38325 | -2.56890 | -4.07831 |
| C  | -3.15259 | -2.24148 | -1.69407 |
| C  | -2.58687 | -0.25355 | -3.14850 |
| C  | -0.66142 | 3.98604  | -0.48249 |
| C  | -0.18878 | 5.43768  | -0.59740 |
| C  | -1.39996 | 3.57482  | -1.76749 |
| C  | -1.58093 | 3.83423  | 0.74158  |
| C  | -2.20065 | -0.95873 | 3.20797  |
| C  | -2.32668 | 0.56405  | 3.38595  |
| C  | -3.25585 | -1.47643 | 2.21720  |
| C  | -2.36854 | -1.64088 | 4.56975  |
| H  | -3.38640 | -2.39190 | -4.49643 |
| H  | -1.64361 | -2.28962 | -4.84719 |
| H  | -2.88710 | -3.27846 | -1.42579 |
| H  | -4.20157 | -2.22771 | -2.03423 |
| H  | -3.06188 | -1.59019 | -0.81070 |
| H  | -1.83439 | 0.18052  | -3.82828 |
| H  | -2.66111 | 0.35071  | -2.22985 |
| H  | -3.56574 | -0.23332 | -3.65580 |
| H  | 0.44990  | 5.60444  | -1.47851 |
| H  | 0.34366  | 5.77649  | 0.30534  |
| H  | -1.08068 | 6.07313  | -0.71358 |
| H  | -0.72806 | 3.63505  | -2.64058 |
| H  | -2.25015 | 4.25723  | -1.93326 |
| H  | -1.01500 | 3.99035  | 1.67570  |
| H  | -2.37725 | 4.59542  | 0.68715  |
| H  | -2.05354 | 2.83772  | 0.74506  |
| H  | -3.30785 | 0.79255  | 3.83384  |
| H  | -1.53812 | 0.94558  | 4.05663  |
| H  | -4.25561 | -1.38155 | 2.67389  |
| H  | -3.23297 | -0.87105 | 1.29392  |
| H  | -1.57402 | -1.35651 | 5.27918  |
| H  | -2.40782 | -2.73726 | 4.49072  |
| H  | -3.32886 | -1.31047 | 4.99563  |
| H  | -2.30399 | -3.64648 | -3.87687 |
| H  | -3.08251 | -2.54072 | 1.98331  |
| H  | -1.79093 | 2.55053  | -1.66707 |
| C  | 3.32356  | -0.75826 | 0.09614  |
| C  | 4.06153  | -0.90307 | -1.09616 |
| C  | 5.44982  | -1.05664 | -1.08681 |
| C  | 6.14473  | -1.04565 | 0.12769  |
| C  | 5.44280  | -0.85818 | 1.32358  |
| C  | 4.05445  | -0.70549 | 1.30002  |
| H  | 3.54511  | -0.88022 | -2.06150 |
| H  | 5.99256  | -1.17560 | -2.03031 |
| H  | 7.23332  | -1.16515 | 0.14071  |

|   |          |          |          |
|---|----------|----------|----------|
| H | 5.98017  | -0.82039 | 2.27684  |
| H | 3.53369  | -0.52228 | 2.24552  |
| H | -2.26325 | 1.07173  | 2.41262  |
| C | 2.54937  | 4.55803  | -0.43548 |
| N | 3.17469  | 5.53742  | -0.52266 |
| C | 3.94618  | 2.02484  | -0.13943 |
| N | 5.10328  | 2.16331  | -0.12580 |
| C | 2.37303  | -3.24589 | -1.57852 |
| N | 3.23333  | -4.02492 | -1.48112 |
| C | 0.07272  | -3.91697 | -3.30466 |
| N | 0.10170  | -4.90062 | -3.92870 |
| C | 2.32873  | -2.90125 | 2.20835  |
| N | 3.17631  | -3.69877 | 2.25534  |
| C | 0.03366  | -3.15917 | 4.05617  |
| N | 0.04584  | -3.99903 | 4.86371  |

**[L<sub>2</sub>Co<sup>II</sup>O]<sup>-</sup> (S = 5/2)**

80

r\_u5.out Energy: -2143685.6780101

|    |          |          |          |
|----|----------|----------|----------|
| C  | -0.33694 | -0.83228 | -1.40258 |
| N  | -0.83039 | -1.77489 | -2.24189 |
| C  | 0.13145  | -2.78147 | -2.43320 |
| C  | 1.25569  | -2.38961 | -1.67912 |
| N  | 0.95289  | -1.15216 | -1.10711 |
| B  | 1.73093  | -0.42767 | 0.07661  |
| N  | 1.54644  | 1.16566  | -0.06625 |
| C  | 0.33689  | 1.77812  | -0.20281 |
| N  | 0.54202  | 3.11773  | -0.29141 |
| C  | 1.90617  | 3.37307  | -0.19751 |
| C  | 2.53312  | 2.14223  | -0.05115 |
| N  | 0.93566  | -0.93566 | 1.34083  |
| C  | -0.31535 | -0.47228 | 1.62067  |
| N  | -0.86142 | -1.26216 | 2.57009  |
| C  | -0.00187 | -2.34768 | 2.84705  |
| C  | 1.14588  | -2.14536 | 2.03052  |
| Co | -1.23261 | 0.47144  | -0.02468 |
| O  | -2.75631 | 1.11386  | -0.36746 |
| C  | -2.23625 | -1.71304 | -2.79582 |
| C  | -2.43133 | -2.73182 | -3.92534 |
| C  | -3.21654 | -2.02191 | -1.65048 |
| C  | -2.46190 | -0.30084 | -3.36139 |
| C  | -0.60030 | 4.10146  | -0.46105 |
| C  | -0.08501 | 5.53962  | -0.56622 |
| C  | -1.34144 | 3.72991  | -1.75525 |
| C  | -1.51059 | 3.97486  | 0.77163  |
| C  | -2.20103 | -1.05542 | 3.21528  |
| C  | -2.74393 | 0.34070  | 2.88381  |
| C  | -3.16000 | -2.13014 | 2.67467  |
| C  | -2.03693 | -1.15191 | 4.74461  |
| H  | -3.42746 | -2.56196 | -4.36314 |
| H  | -1.68667 | -2.60616 | -4.72749 |
| H  | -2.98148 | -2.99531 | -1.18844 |
| H  | -4.24386 | -2.06611 | -2.04850 |
| H  | -3.18624 | -1.23359 | -0.88297 |
| H  | -1.72059 | -0.07782 | -4.14699 |
| H  | -2.40185 | 0.45844  | -2.57023 |

|   |          |          |          |
|---|----------|----------|----------|
| H | -3.46836 | -0.25031 | -3.80846 |
| H | 0.57579  | 5.68633  | -1.43447 |
| H | 0.43323  | 5.87002  | 0.34694  |
| H | -0.95872 | 6.19566  | -0.70347 |
| H | -0.65878 | 3.78321  | -2.61991 |
| H | -2.16430 | 4.44535  | -1.91729 |
| H | -0.94244 | 4.17543  | 1.69542  |
| H | -2.32464 | 4.71425  | 0.69624  |
| H | -1.96228 | 2.97421  | 0.82417  |
| H | -3.65240 | 0.50663  | 3.48509  |
| H | -2.01265 | 1.12610  | 3.13371  |
| H | -4.16354 | -1.98875 | 3.10805  |
| H | -3.23643 | -2.04414 | 1.57770  |
| H | -1.30992 | -0.40243 | 5.09957  |
| H | -1.70961 | -2.14545 | 5.07939  |
| H | -3.00818 | -0.94367 | 5.22115  |
| H | -2.40287 | -3.77085 | -3.56778 |
| H | -2.81808 | -3.14651 | 2.92671  |
| H | -1.77157 | 2.72139  | -1.68159 |
| C | 3.30654  | -0.71341 | 0.08828  |
| C | 4.03031  | -0.74937 | -1.12151 |
| C | 5.41718  | -0.91027 | -1.14077 |
| C | 6.12141  | -1.02371 | 0.06345  |
| C | 5.43021  | -0.96222 | 1.27899  |
| C | 4.04272  | -0.80007 | 1.28530  |
| H | 3.49740  | -0.64775 | -2.07334 |
| H | 5.95155  | -0.94295 | -2.09598 |
| H | 7.20938  | -1.14992 | 0.05497  |
| H | 5.97622  | -1.03325 | 2.22549  |
| H | 3.52454  | -0.72871 | 2.24654  |
| H | -3.01690 | 0.45200  | 1.82519  |
| C | 2.60437  | 4.60788  | -0.22975 |
| N | 3.25447  | 5.57375  | -0.24532 |
| C | 3.94432  | 2.04447  | 0.09711  |
| N | 5.09389  | 2.19213  | 0.21441  |
| C | 2.41535  | -3.17737 | -1.53236 |
| N | 3.31298  | -3.92542 | -1.47237 |
| C | 0.05355  | -3.97392 | -3.17367 |
| N | 0.07544  | -4.98602 | -3.76251 |
| C | 2.20861  | -3.05124 | 1.91495  |
| N | 3.04588  | -3.87535 | 1.89574  |
| C | -0.26451 | -3.44805 | 3.66621  |
| N | -0.45594 | -4.39124 | 4.34266  |

**[L<sub>2</sub>Co<sup>II</sup>OH] (S=1/2)**

81

h\_u1.out Energy: -2144039.9907461

|   |          |          |         |
|---|----------|----------|---------|
| C | 0.36976  | -0.74932 | 1.48923 |
| N | 0.86573  | -1.43414 | 2.55937 |
| C | 0.00780  | -2.49172 | 2.86073 |
| C | -1.07203 | -2.38997 | 1.99583 |
| N | -0.86413 | -1.27168 | 1.21337 |
| B | -1.71139 | -0.67538 | 0.01127 |
| N | -1.51285 | 0.89563  | 0.06987 |
| C | -0.24855 | 1.41105  | 0.06931 |
| N | -0.35091 | 2.76749  | 0.12502 |

|    |          |          |          |
|----|----------|----------|----------|
| C  | -1.70127 | 3.11662  | 0.16018  |
| C  | -2.42548 | 1.93343  | 0.12564  |
| N  | -0.90590 | -1.17411 | -1.26198 |
| C  | 0.31789  | -0.62852 | -1.53772 |
| N  | 0.77646  | -1.22489 | -2.67529 |
| C  | -0.09142 | -2.25755 | -3.02989 |
| C  | -1.14105 | -2.22725 | -2.12325 |
| Co | 1.18334  | 0.20873  | -0.00288 |
| O  | 2.75226  | -0.77405 | -0.07013 |
| C  | 2.10380  | -1.08368 | 3.35373  |
| C  | 1.71925  | -1.02207 | 4.84370  |
| C  | 3.17538  | -2.14886 | 3.07802  |
| C  | 2.61753  | 0.29779  | 2.93079  |
| C  | 0.79970  | 3.73637  | 0.14340  |
| C  | 0.70263  | 4.63543  | -1.10054 |
| C  | 0.73667  | 4.54868  | 1.44775  |
| C  | 2.11891  | 2.95647  | 0.10083  |
| C  | 1.98439  | -0.80654 | -3.48306 |
| C  | 2.50987  | 0.53967  | -2.97025 |
| C  | 3.06738  | -1.88498 | -3.33168 |
| C  | 1.54561  | -0.62830 | -4.94848 |
| H  | 2.59511  | -0.68613 | 5.42066  |
| H  | 0.90225  | -0.29909 | 5.00362  |
| H  | 2.83745  | -3.15810 | 3.36289  |
| H  | 4.08014  | -1.91807 | 3.66332  |
| H  | 3.43406  | -2.13591 | 2.00823  |
| H  | 1.83172  | 1.06415  | 3.02696  |
| H  | 2.99414  | 0.27041  | 1.89965  |
| H  | 3.44978  | 0.57275  | 3.59778  |
| H  | -0.21147 | 5.24810  | -1.10312 |
| H  | 0.72154  | 4.02541  | -2.01871 |
| H  | 1.56368  | 5.32221  | -1.12096 |
| H  | -0.17495 | 5.16100  | 1.51617  |
| H  | 1.60006  | 5.23137  | 1.49235  |
| H  | 2.21713  | 2.37076  | -0.82657 |
| H  | 2.95277  | 3.67549  | 0.11725  |
| H  | 2.23644  | 2.30622  | 0.98176  |
| H  | 3.31597  | 0.87170  | -3.64337 |
| H  | 1.71874  | 1.30651  | -2.97578 |
| H  | 3.94984  | -1.60441 | -3.92916 |
| H  | 3.36479  | -1.95548 | -2.27425 |
| H  | 0.72137  | 0.10060  | -5.02026 |
| H  | 1.22967  | -1.56795 | -5.42297 |
| H  | 2.39886  | -0.24235 | -5.52796 |
| H  | 1.41540  | -1.99580 | 5.25288  |
| H  | 2.72102  | -2.87007 | -3.68313 |
| H  | 0.77780  | 3.87733  | 2.32122  |
| C  | -3.27617 | -0.99251 | 0.02531  |
| C  | -3.98817 | -1.08899 | 1.23806  |
| C  | -5.37677 | -1.24152 | 1.26203  |
| C  | -6.09560 | -1.28129 | 0.06205  |
| C  | -5.41779 | -1.14888 | -1.15498 |
| C  | -4.02894 | -0.99671 | -1.16645 |
| H  | -3.45541 | -1.02313 | 2.19234  |
| H  | -5.90071 | -1.31943 | 2.22012  |
| H  | -7.18412 | -1.39948 | 0.07599  |
| H  | -5.97397 | -1.15387 | -2.09793 |
| H  | -3.52868 | -0.85714 | -2.13036 |
| H  | 2.92464  | 0.43230  | -1.95922 |

|   |          |          |          |
|---|----------|----------|----------|
| H | 2.62996  | -1.73500 | -0.10967 |
| C | 0.08716  | -3.21660 | -4.05776 |
| N | 0.20710  | -4.03583 | -4.87692 |
| C | -2.17889 | -3.19445 | -2.03820 |
| N | -2.97269 | -4.04450 | -2.00268 |
| C | -3.84596 | 1.88529  | 0.14731  |
| N | -5.00334 | 2.00838  | 0.17150  |
| C | -2.23953 | 4.42521  | 0.21743  |
| N | -2.70846 | 5.49045  | 0.26387  |
| C | -2.11450 | -3.34787 | 1.87130  |
| N | -2.91093 | -4.19295 | 1.79699  |
| C | 0.21749  | -3.52867 | 3.80350  |
| N | 0.36157  | -4.40986 | 4.55138  |

[L<sub>2</sub>Co<sup>II</sup>OH] (S = 3/2)

81

h\_u3.out Energy: -2144034.3342565

|    |          |          |          |
|----|----------|----------|----------|
| C  | 0.34007  | -0.75727 | 1.50337  |
| N  | 0.80157  | -1.55254 | 2.50550  |
| C  | -0.17013 | -2.49554 | 2.82580  |
| C  | -1.26089 | -2.23541 | 2.00617  |
| N  | -0.94826 | -1.12318 | 1.24172  |
| B  | -1.74338 | -0.49115 | 0.00440  |
| N  | -1.55003 | 1.10473  | 0.00699  |
| C  | -0.33030 | 1.71690  | 0.01767  |
| N  | -0.52182 | 3.05917  | -0.00062 |
| C  | -1.88803 | 3.32066  | -0.02396 |
| C  | -2.53157 | 2.09012  | -0.01985 |
| N  | -0.92891 | -1.10777 | -1.22358 |
| C  | 0.35388  | -0.71583 | -1.48155 |
| N  | 0.82498  | -1.49151 | -2.49498 |
| C  | -0.12761 | -2.45269 | -2.81813 |
| C  | -1.22079 | -2.22144 | -1.99376 |
| Co | 1.19201  | 0.41901  | 0.03663  |
| O  | 3.00389  | 0.82261  | -0.09084 |
| C  | 2.19972  | -1.40357 | 3.07632  |
| C  | 2.36030  | -2.22831 | 4.35722  |
| C  | 3.19647  | -1.88131 | 2.00919  |
| C  | 2.41375  | 0.08160  | 3.40998  |
| C  | 0.64236  | 4.03220  | 0.01497  |
| C  | 0.15387  | 5.48211  | -0.03352 |
| C  | 1.42187  | 3.79839  | 1.31843  |
| C  | 1.51771  | 3.74213  | -1.21559 |
| C  | 2.21264  | -1.30906 | -3.08172 |
| C  | 2.41938  | 0.19247  | -3.33752 |
| C  | 3.22570  | -1.84575 | -2.05955 |
| C  | 2.34683  | -2.06365 | -4.40889 |
| H  | 3.34769  | -1.99558 | 4.78504  |
| H  | 1.60080  | -1.97334 | 5.11370  |
| H  | 2.97066  | -2.91409 | 1.69633  |
| H  | 4.21476  | -1.86139 | 2.43075  |
| H  | 3.17867  | -1.21563 | 1.13304  |
| H  | 1.65321  | 0.43971  | 4.12272  |
| H  | 2.37737  | 0.70532  | 2.50689  |
| H  | 3.40900  | 0.20765  | 3.86474  |

|   |          |          |          |
|---|----------|----------|----------|
| H | -0.46263 | 5.74719  | 0.83878  |
| H | -0.40356 | 5.70382  | -0.95654 |
| H | 1.04064  | 6.13450  | -0.01917 |
| H | 0.77755  | 3.95937  | 2.19811  |
| H | 2.26937  | 4.50037  | 1.36960  |
| H | 0.91952  | 3.79057  | -2.14026 |
| H | 2.31401  | 4.50158  | -1.27688 |
| H | 1.99929  | 2.75592  | -1.13995 |
| H | 3.40016  | 0.33714  | -3.81844 |
| H | 1.63951  | 0.58444  | -4.01114 |
| H | 4.23890  | -1.78705 | -2.48991 |
| H | 3.21182  | -1.23845 | -1.14321 |
| H | 1.56066  | -1.78072 | -5.12767 |
| H | 2.34511  | -3.15502 | -4.27808 |
| H | 3.31734  | -1.79240 | -4.85235 |
| H | 2.33689  | -3.31072 | 4.16638  |
| H | 3.01404  | -2.89995 | -1.81471 |
| H | 1.82462  | 2.77636  | 1.35579  |
| C | -3.31629 | -0.77425 | -0.00440 |
| C | -4.05528 | -0.80112 | 1.19624  |
| C | -5.44345 | -0.95212 | 1.19872  |
| C | -6.13589 | -1.05623 | -0.01261 |
| C | -5.43281 | -0.98470 | -1.22021 |
| C | -4.04465 | -0.83299 | -1.21005 |
| H | -3.54312 | -0.68264 | 2.15668  |
| H | -5.98775 | -0.97785 | 2.14806  |
| H | -7.22449 | -1.17405 | -0.01585 |
| H | -5.96892 | -1.03544 | -2.17321 |
| H | -3.52527 | -0.73736 | -2.16892 |
| H | 2.42005  | 0.76497  | -2.40109 |
| H | 3.41695  | 1.39225  | 0.57517  |
| C | -0.06064 | -3.51758 | -3.75372 |
| N | -0.09117 | -4.42177 | -4.48619 |
| C | -2.33870 | -3.09461 | -1.90141 |
| N | -3.18030 | -3.89753 | -1.86445 |
| C | -3.95004 | 1.99700  | -0.04043 |
| N | -5.10603 | 2.13746  | -0.05944 |
| C | -2.57117 | 4.56434  | -0.04945 |
| N | -3.20745 | 5.53881  | -0.07110 |
| C | -2.39943 | -3.08248 | 1.91949  |
| N | -3.25851 | -3.86701 | 1.89273  |
| C | -0.12419 | -3.56459 | 3.75796  |
| N | -0.17212 | -4.46825 | 4.49006  |

[L<sub>2</sub>Co<sup>II</sup>OH] (S=5/2)

81

h\_u5.out Energy: -2143975.4844607

|   |          |          |         |
|---|----------|----------|---------|
| C | 0.31538  | -0.71900 | 1.52495 |
| N | 0.79834  | -1.51135 | 2.51726 |
| C | -0.13009 | -2.51254 | 2.78647 |
| C | -1.21404 | -2.28650 | 1.94785 |
| N | -0.94316 | -1.13989 | 1.22328 |
| B | -1.75712 | -0.49206 | 0.00096 |
| N | -1.56556 | 1.08198  | 0.02369 |
| C | -0.34824 | 1.70453  | 0.00581 |
| N | -0.50529 | 3.05888  | 0.01630 |
| C | -1.86841 | 3.37462  | 0.05099 |

|    |          |          |          |
|----|----------|----------|----------|
| C  | -2.57397 | 2.05895  | 0.06611  |
| N  | -0.94728 | -1.10492 | -1.24345 |
| C  | 0.32980  | -0.71387 | -1.50495 |
| N  | 0.80476  | -1.47778 | -2.52293 |
| C  | -0.15562 | -2.42673 | -2.86041 |
| C  | -1.24775 | -2.20024 | -2.03248 |
| Co | 1.13619  | 0.44831  | 0.01553  |
| O  | 2.94251  | 0.70715  | 0.03420  |
| C  | 2.17417  | -1.32678 | 3.13433  |
| C  | 2.25800  | -2.04119 | 4.48867  |
| C  | 3.20311  | -1.90858 | 2.15388  |
| C  | 2.40169  | 0.17727  | 3.35355  |
| C  | 0.67360  | 4.00609  | 0.00409  |
| C  | 0.21407  | 5.46801  | -0.01361 |
| C  | 1.49773  | 3.75905  | 1.27872  |
| C  | 1.49664  | 3.73228  | -1.26601 |
| C  | 2.20655  | -1.32595 | -3.08796 |
| C  | 2.48236  | 0.17314  | -3.28495 |
| C  | 3.17784  | -1.94698 | -2.07319 |
| C  | 2.32634  | -2.03210 | -4.44332 |
| H  | 3.20855  | -1.75292 | 4.96313  |
| H  | 1.44068  | -1.74011 | 5.16415  |
| H  | 2.99751  | -2.97302 | 1.95312  |
| H  | 4.20996  | -1.82773 | 2.59497  |
| H  | 3.19934  | -1.34537 | 1.20931  |
| H  | 1.58892  | 0.61631  | 3.95445  |
| H  | 2.48793  | 0.71486  | 2.40149  |
| H  | 3.35037  | 0.31345  | 3.89634  |
| H  | -0.36123 | 5.73573  | 0.88473  |
| H  | -0.37930 | 5.70714  | -0.90866 |
| H  | 1.11444  | 6.10166  | -0.03201 |
| H  | 0.87904  | 3.91180  | 2.17789  |
| H  | 2.34503  | 4.46266  | 1.31279  |
| H  | 0.87381  | 3.85306  | -2.16713 |
| H  | 2.33476  | 4.44532  | -1.32151 |
| H  | 1.91968  | 2.71846  | -1.26971 |
| H  | 3.45215  | 0.28880  | -3.79420 |
| H  | 1.70242  | 0.63841  | -3.90921 |
| H  | 4.20728  | -1.86662 | -2.45849 |
| H  | 3.13073  | -1.41330 | -1.11319 |
| H  | 1.55771  | -1.69086 | -5.15564 |
| H  | 2.28389  | -3.12661 | -4.35746 |
| H  | 3.31068  | -1.78024 | -4.86693 |
| H  | 2.26651  | -3.13544 | 4.39152  |
| H  | 2.94910  | -3.01356 | -1.91308 |
| H  | 1.90562  | 2.73903  | 1.30767  |
| C  | -3.32359 | -0.79925 | -0.00820 |
| C  | -4.05959 | -0.91783 | 1.18725  |
| C  | -5.44653 | -1.08264 | 1.17902  |
| C  | -6.13919 | -1.10756 | -0.03627 |
| C  | -5.43833 | -0.94470 | -1.23621 |
| C  | -4.05156 | -0.78229 | -1.21540 |
| H  | -3.54938 | -0.85684 | 2.15388  |
| H  | -5.98986 | -1.17973 | 2.12435  |
| H  | -7.22672 | -1.23478 | -0.04716 |
| H  | -5.97483 | -0.93466 | -2.19033 |
| H  | -3.53150 | -0.61954 | -2.16531 |
| H  | 2.55076  | 0.70048  | -2.32570 |
| H  | 3.35875  | 1.58301  | 0.04859  |



|   |          |          |          |
|---|----------|----------|----------|
| C | -0.09695 | -3.47437 | -3.81582 |
| N | -0.13861 | -4.36541 | -4.56341 |
| C | -2.38120 | -3.05631 | -1.96511 |
| N | -3.23238 | -3.84949 | -1.95952 |
| C | -3.95125 | 1.97329  | 0.12918  |
| N | -5.12376 | 2.11224  | 0.18648  |
| C | -2.51483 | 4.59535  | 0.06897  |
| N | -3.15781 | 5.58640  | 0.08650  |
| C | -2.30783 | -3.18311 | 1.80193  |
| N | -3.12623 | -4.00590 | 1.71888  |
| C | -0.04529 | -3.60593 | 3.68705  |
| N | -0.06041 | -4.53714 | 4.38505  |

#### 4. Thermodynamic cycle for the $L_3Co^{III}O$ oxidant

$[L_3Co^{III}O] (S=0)$

74

o\_u0.out Energy: -1806771.4859002

|    |          |          |          |
|----|----------|----------|----------|
| C  | -0.33097 | 1.55460  | -0.07505 |
| N  | -0.75335 | 2.84288  | -0.25442 |
| C  | 0.29027  | 3.60136  | -0.77489 |
| C  | 1.37193  | 2.78395  | -0.89221 |
| N  | 0.99319  | 1.54031  | -0.41415 |
| B  | 1.70667  | 0.16820  | -0.34941 |
| N  | 1.45862  | -0.44976 | 1.03611  |
| C  | 0.16962  | -0.62636 | 1.40825  |
| N  | 0.20510  | -1.19728 | 2.64556  |
| C  | 1.53194  | -1.37406 | 3.03781  |
| C  | 2.31661  | -0.90372 | 2.02705  |
| N  | 0.98828  | -0.69709 | -1.41393 |
| C  | -0.34014 | -0.94624 | -1.20723 |
| N  | -0.76533 | -1.65579 | -2.29622 |
| C  | 0.28260  | -1.78044 | -3.20282 |
| C  | 1.36871  | -1.16555 | -2.66063 |
| Co | -1.27314 | -0.08957 | 0.23377  |
| O  | -2.91404 | 0.01639  | 0.00796  |
| C  | -2.12033 | 3.40941  | 0.04419  |
| C  | -2.05729 | 4.94432  | -0.00467 |
| C  | -3.10713 | 2.89952  | -1.01665 |
| C  | -2.53283 | 2.97960  | 1.46049  |
| C  | -1.00432 | -1.62834 | 3.42252  |
| C  | -0.57599 | -2.15681 | 4.79712  |
| C  | -1.93406 | -0.41802 | 3.60493  |
| C  | -1.70410 | -2.74415 | 2.62929  |
| C  | -2.14823 | -2.20343 | -2.55331 |
| C  | -2.63325 | -2.94983 | -1.30099 |
| C  | -3.07182 | -1.02900 | -2.90947 |
| C  | -2.09355 | -3.19617 | -3.72543 |
| H  | -3.04401 | 5.33598  | 0.28709  |
| H  | -1.31222 | 5.35124  | 0.69921  |
| H  | -2.75396 | 3.16536  | -2.02788 |
| H  | -4.09046 | 3.37376  | -0.85898 |
| H  | -3.22221 | 1.80738  | -0.92986 |
| H  | -1.79173 | 3.32274  | 2.20212  |
| H  | -2.63329 | 1.88907  | 1.52487  |

|   |          |          |          |
|---|----------|----------|----------|
| H | -3.50796 | 3.42977  | 1.70786  |
| H | -0.05500 | -1.38524 | 5.38780  |
| H | 0.07013  | -3.04609 | 4.71639  |
| H | -1.47818 | -2.45360 | 5.35412  |
| H | -1.39942 | 0.41723  | 4.08667  |
| H | -2.78917 | -0.70116 | 4.23984  |
| H | -1.03106 | -3.60736 | 2.49456  |
| H | -2.60482 | -3.08130 | 3.16757  |
| H | -2.01152 | -2.38166 | 1.63637  |
| H | -3.60356 | -3.42582 | -1.51652 |
| H | -1.91513 | -3.73641 | -1.01405 |
| H | -4.07993 | -1.41092 | -3.14271 |
| H | -3.14382 | -0.33944 | -2.05439 |
| H | -1.38608 | -4.02060 | -3.53552 |
| H | -1.83384 | -2.70961 | -4.67944 |
| H | -3.09592 | -3.63438 | -3.84924 |
| H | -1.84407 | 5.32472  | -1.01682 |
| H | -2.68974 | -0.49577 | -3.79696 |
| H | -2.33078 | -0.07663 | 2.63672  |
| C | 3.97201  | 1.28710  | -0.01733 |
| C | 5.36043  | 1.31136  | -0.01388 |
| C | 6.06403  | 0.20945  | -0.50956 |
| C | 5.34388  | -0.89871 | -0.96624 |
| C | 3.95606  | -0.86197 | -0.94341 |
| H | 3.39049  | 2.10730  | 0.40266  |
| H | 5.87537  | 2.18706  | 0.38744  |
| H | 7.15775  | 0.20552  | -0.51958 |
| H | 5.84561  | -1.79824 | -1.32980 |
| H | 3.36112  | -1.72276 | -1.24819 |
| H | 0.19722  | 4.65279  | -1.02313 |
| H | 2.35668  | 3.00644  | -1.29498 |
| H | 1.82081  | -1.81000 | 3.98866  |
| H | 3.40114  | -0.86158 | 1.95162  |
| H | 0.18893  | -2.28921 | -4.15579 |
| H | 2.35864  | -1.02392 | -3.08685 |
| H | -2.77176 | -2.25490 | -0.46331 |
| N | 3.27836  | 0.23184  | -0.51281 |

[L<sub>3</sub>Co<sup>III</sup>O] (S=1)

74

o\_u2.out Energy: -1806769.0231200

|   |          |          |          |
|---|----------|----------|----------|
| C | -0.35012 | 1.64129  | 0.06001  |
| N | -0.74120 | 2.90846  | -0.23159 |
| C | 0.28125  | 3.58009  | -0.89442 |
| C | 1.32932  | 2.71555  | -0.99275 |
| N | 0.95042  | 1.53813  | -0.36020 |
| B | 1.64282  | 0.14585  | -0.31259 |
| N | 1.41962  | -0.48947 | 1.07282  |
| C | 0.14752  | -0.68385 | 1.49104  |
| N | 0.21497  | -1.25435 | 2.71881  |
| C | 1.55420  | -1.42018 | 3.07556  |
| C | 2.30638  | -0.94095 | 2.04454  |
| N | 0.94792  | -0.72611 | -1.39828 |
| C | -0.35440 | -1.10727 | -1.20367 |
| N | -0.74696 | -1.71009 | -2.35528 |
| C | 0.27684  | -1.64946 | -3.29559 |
| C | 1.32710  | -1.01609 | -2.70297 |

|    |          |          |          |
|----|----------|----------|----------|
| Co | -1.25931 | -0.13182 | 0.29816  |
| O  | -2.89391 | -0.03653 | 0.10064  |
| C  | -2.10366 | 3.48378  | 0.03626  |
| C  | -2.01357 | 5.01696  | 0.03696  |
| C  | -3.04682 | 3.00040  | -1.07708 |
| C  | -2.58520 | 3.00068  | 1.41235  |
| C  | -0.98803 | -1.64522 | 3.52467  |
| C  | -0.54026 | -2.24632 | 4.86165  |
| C  | -1.83157 | -0.38448 | 3.77511  |
| C  | -1.78290 | -2.68763 | 2.72124  |
| C  | -2.11337 | -2.27603 | -2.62254 |
| C  | -2.61432 | -2.98979 | -1.35831 |
| C  | -3.03987 | -1.10826 | -2.99789 |
| C  | -2.02503 | -3.28604 | -3.77626 |
| H  | -2.99495 | 5.42566  | 0.32399  |
| H  | -1.26653 | 5.37872  | 0.76331  |
| H  | -2.67831 | 3.32449  | -2.06545 |
| H  | -4.05252 | 3.42690  | -0.92562 |
| H  | -3.11908 | 1.90212  | -1.04802 |
| H  | -1.85635 | 3.26301  | 2.19742  |
| H  | -2.74374 | 1.91357  | 1.40631  |
| H  | -3.54488 | 3.48807  | 1.64942  |
| H  | 0.03653  | -1.52445 | 5.46298  |
| H  | 0.06127  | -3.15927 | 4.72067  |
| H  | -1.43563 | -2.52305 | 5.43960  |
| H  | -1.24143 | 0.38072  | 4.30613  |
| H  | -2.71020 | -0.64007 | 4.38910  |
| H  | -1.16339 | -3.57635 | 2.51555  |
| H  | -2.67137 | -3.00237 | 3.29208  |
| H  | -2.12398 | -2.26893 | 1.76125  |
| H  | -3.57301 | -3.48551 | -1.58171 |
| H  | -1.89305 | -3.75606 | -1.02829 |
| H  | -4.05095 | -1.48939 | -3.21856 |
| H  | -3.10296 | -0.40204 | -2.15557 |
| H  | -1.28842 | -4.07909 | -3.56421 |
| H  | -1.76990 | -2.80837 | -4.73602 |
| H  | -3.01069 | -3.76012 | -3.90353 |
| H  | -1.77191 | 5.42477  | -0.95795 |
| H  | -2.66288 | -0.58653 | -3.89419 |
| H  | -2.19287 | 0.04505  | 2.82743  |
| C  | 3.90346  | 1.27840  | 0.01327  |
| C  | 5.29162  | 1.31391  | 0.00318  |
| C  | 5.99874  | 0.22523  | -0.51661 |
| C  | 5.28366  | -0.88089 | -0.98629 |
| C  | 3.89580  | -0.85639 | -0.94918 |
| H  | 3.31621  | 2.08863  | 0.44572  |
| H  | 5.80405  | 2.18781  | 0.41156  |
| H  | 7.09232  | 0.23065  | -0.53740 |
| H  | 5.78968  | -1.76868 | -1.37207 |
| H  | 3.30194  | -1.71311 | -1.26840 |
| H  | 0.19865  | 4.60709  | -1.23615 |
| H  | 2.29721  | 2.86266  | -1.46661 |
| H  | 1.87047  | -1.85723 | 4.01739  |
| H  | 3.38800  | -0.89168 | 1.94042  |
| H  | 0.19367  | -2.05920 | -4.29736 |
| H  | 2.29691  | -0.75811 | -3.12268 |
| H  | -2.78125 | -2.26747 | -0.54750 |
| N  | 3.21495  | 0.22341  | -0.48988 |

[L<sub>3</sub>Co<sup>III</sup>O] (S=2)

74

o\_u4.out Energy: -1806766.0662013

|    |          |          |          |
|----|----------|----------|----------|
| C  | -0.39085 | 1.64084  | -0.01384 |
| N  | -0.75437 | 2.89284  | -0.38690 |
| C  | 0.31078  | 3.53946  | -1.00146 |
| C  | 1.35717  | 2.66471  | -0.99910 |
| N  | 0.92747  | 1.51230  | -0.35078 |
| B  | 1.59019  | 0.10648  | -0.25771 |
| N  | 1.34191  | -0.54020 | 1.13152  |
| C  | 0.08779  | -0.75396 | 1.62283  |
| N  | 0.24400  | -1.32307 | 2.84007  |
| C  | 1.59718  | -1.47073 | 3.12933  |
| C  | 2.28413  | -0.98233 | 2.05924  |
| N  | 0.93681  | -0.73608 | -1.40348 |
| C  | -0.38297 | -1.06349 | -1.28992 |
| N  | -0.74622 | -1.60434 | -2.47733 |
| C  | 0.32362  | -1.58148 | -3.36028 |
| C  | 1.37233  | -1.01612 | -2.69173 |
| Co | -1.40119 | -0.17718 | 0.32333  |
| O  | -2.98371 | -0.18579 | 0.90265  |
| C  | -2.13361 | 3.45578  | -0.19001 |
| C  | -2.12810 | 4.95195  | -0.52744 |
| C  | -3.10179 | 2.70966  | -1.12350 |
| C  | -2.53227 | 3.25050  | 1.28004  |
| C  | -0.90666 | -1.70392 | 3.72633  |
| C  | -0.37538 | -2.35709 | 5.00736  |
| C  | -1.68829 | -0.42439 | 4.06735  |
| C  | -1.79693 | -2.69697 | 2.96044  |
| C  | -2.12815 | -2.12395 | -2.75465 |
| C  | -2.46170 | -3.18252 | -1.69059 |
| C  | -3.11727 | -0.94883 | -2.67760 |
| C  | -2.16776 | -2.75393 | -4.15160 |
| H  | -3.13039 | 5.36083  | -0.32619 |
| H  | -1.40604 | 5.50799  | 0.09334  |
| H  | -2.75736 | 2.76235  | -2.16996 |
| H  | -4.10272 | 3.16771  | -1.06225 |
| H  | -3.19132 | 1.65532  | -0.82253 |
| H  | -1.81035 | 3.74490  | 1.95167  |
| H  | -2.58038 | 2.17771  | 1.52121  |
| H  | -3.52819 | 3.69018  | 1.45394  |
| H  | 0.25720  | -1.66729 | 5.59027  |
| H  | 0.19663  | -3.27556 | 4.79434  |
| H  | -1.23231 | -2.63627 | 5.63996  |
| H  | -1.03420 | 0.30756  | 4.57086  |
| H  | -2.52287 | -0.66946 | 4.74505  |
| H  | -1.21595 | -3.58088 | 2.64753  |
| H  | -2.61996 | -3.03314 | 3.61244  |
| H  | -2.23529 | -2.21435 | 2.07349  |
| H  | -3.46997 | -3.58784 | -1.87434 |
| H  | -1.73769 | -4.01367 | -1.72544 |
| H  | -4.12140 | -1.29051 | -2.97735 |
| H  | -3.18642 | -0.56102 | -1.64901 |
| H  | -1.45038 | -3.58583 | -4.24627 |
| H  | -1.96576 | -2.01302 | -4.94260 |
| H  | -3.17616 | -3.15963 | -4.32658 |

|   |          |          |          |
|---|----------|----------|----------|
| H | -1.90455 | 5.13683  | -1.59113 |
| H | -2.80983 | -0.13103 | -3.35018 |
| H | -2.10315 | 0.02280  | 3.15063  |
| C | 3.84771  | 1.22921  | 0.13445  |
| C | 5.23572  | 1.26848  | 0.15240  |
| C | 5.95593  | 0.18850  | -0.36740 |
| C | 5.25296  | -0.91316 | -0.86501 |
| C | 3.86446  | -0.89216 | -0.85466 |
| H | 3.25013  | 2.03119  | 0.56811  |
| H | 5.73741  | 2.13770  | 0.58346  |
| H | 7.04968  | 0.19653  | -0.36594 |
| H | 5.76857  | -1.79554 | -1.25043 |
| H | 3.28076  | -1.74865 | -1.19221 |
| H | 0.26141  | 4.55295  | -1.38736 |
| H | 2.35260  | 2.79127  | -1.41851 |
| H | 1.97420  | -1.90175 | 4.05156  |
| H | 3.35946  | -0.92653 | 1.91130  |
| H | 0.27718  | -1.95684 | -4.37802 |
| H | 2.37140  | -0.79368 | -3.05946 |
| H | -2.44541 | -2.74286 | -0.68088 |
| N | 3.17121  | 0.18018  | -0.39690 |

**[L<sub>3</sub>Co<sup>III</sup>OH]<sup>+</sup> (S = 0)**

75

p\_u0.out Energy: -1807065.4647240

|    |          |          |          |
|----|----------|----------|----------|
| C  | -0.39517 | -1.18985 | -1.00521 |
| N  | -0.94877 | -2.30014 | -1.56984 |
| C  | 0.04950  | -3.25863 | -1.72359 |
| C  | 1.20602  | -2.73635 | -1.23484 |
| N  | 0.92448  | -1.44828 | -0.81220 |
| B  | 1.69020  | -0.47682 | 0.12191  |
| N  | 1.54079  | 0.95655  | -0.42904 |
| C  | 0.31346  | 1.50557  | -0.55634 |
| N  | 0.48182  | 2.81822  | -0.87613 |
| C  | 1.84960  | 3.06705  | -0.98325 |
| C  | 2.50671  | 1.91007  | -0.70161 |
| N  | 0.91696  | -0.55531 | 1.47010  |
| C  | -0.38641 | -0.14991 | 1.42548  |
| N  | -0.92142 | -0.43994 | 2.63792  |
| C  | 0.03156  | -1.07084 | 3.42964  |
| C  | 1.17341  | -1.15896 | 2.69071  |
| Co | -1.16269 | 0.38777  | -0.29492 |
| O  | -2.10539 | 0.88738  | -1.73461 |
| C  | -2.38755 | -2.55906 | -1.97431 |
| C  | -2.60925 | -4.07720 | -2.08355 |
| C  | -3.33093 | -2.01066 | -0.89616 |
| C  | -2.64368 | -1.90120 | -3.33771 |
| C  | -0.55034 | 3.91145  | -1.06510 |
| C  | 0.09397  | 5.26046  | -0.69827 |
| C  | -0.98999 | 3.92350  | -2.53618 |
| C  | -1.74436 | 3.67067  | -0.13154 |
| C  | -2.31584 | -0.17431 | 3.12135  |
| C  | -3.10235 | 0.61297  | 2.07210  |
| C  | -2.99712 | -1.52763 | 3.38300  |
| C  | -2.22252 | 0.66032  | 4.41052  |
| H  | -3.67701 | -4.25316 | -2.28356 |

|   |          |          |          |
|---|----------|----------|----------|
| H | -2.04913 | -4.52711 | -2.91812 |
| H | -3.06282 | -2.40377 | 0.09785  |
| H | -4.36246 | -2.32198 | -1.12203 |
| H | -3.32866 | -0.91170 | -0.88230 |
| H | -1.91895 | -2.26053 | -4.08661 |
| H | -2.57892 | -0.80857 | -3.25753 |
| H | -3.65700 | -2.16140 | -3.68417 |
| H | 0.87649  | 5.56674  | -1.40977 |
| H | 0.51736  | 5.24287  | 0.31937  |
| H | -0.68659 | 6.03562  | -0.73131 |
| H | -0.12362 | 4.05298  | -3.20548 |
| H | -1.68476 | 4.76243  | -2.70407 |
| H | -1.40759 | 3.46010  | 0.89717  |
| H | -2.36944 | 4.57655  | -0.10652 |
| H | -2.37373 | 2.85185  | -0.50182 |
| H | -4.11312 | 0.81257  | 2.46044  |
| H | -2.63830 | 1.58838  | 1.85727  |
| H | -4.02864 | -1.36190 | 3.73203  |
| H | -3.03387 | -2.12948 | 2.46045  |
| H | -1.69169 | 1.60795  | 4.22170  |
| H | -1.70038 | 0.12021  | 5.21583  |
| H | -3.23710 | 0.89383  | 4.76995  |
| H | -2.34869 | -4.59769 | -1.14749 |
| H | -2.46778 | -2.10775 | 4.15557  |
| H | -1.51154 | 2.99037  | -2.79019 |
| C | 3.90106  | -1.16542 | -0.89937 |
| C | 5.28110  | -1.30920 | -0.90455 |
| C | 6.00318  | -1.01030 | 0.25565  |
| C | 5.31267  | -0.54814 | 1.38046  |
| C | 3.93122  | -0.42381 | 1.32497  |
| H | 3.30871  | -1.34470 | -1.79714 |
| H | 5.77747  | -1.64173 | -1.81894 |
| H | 7.09152  | -1.11705 | 0.27598  |
| H | 5.83467  | -0.27031 | 2.29878  |
| H | 3.36536  | -0.02038 | 2.16428  |
| H | -0.12894 | -4.23220 | -2.16587 |
| H | 2.18481  | -3.20077 | -1.14919 |
| H | 2.25069  | 4.03983  | -1.24562 |
| H | 3.57457  | 1.70887  | -0.67251 |
| H | -0.16798 | -1.40300 | 4.44510  |
| H | 2.12307  | -1.61688 | 2.95501  |
| H | -3.24428 | 0.04109  | 1.14019  |
| H | -1.63124 | 0.90296  | -2.58212 |
| N | 3.23078  | -0.76249 | 0.21221  |

**[L<sub>3</sub>Co<sup>III</sup>OH]<sup>+</sup> (S = 1)**

75

p\_u2.out Energy: -1807056.4824530

|   |          |          |          |
|---|----------|----------|----------|
| C | -0.47008 | -1.36550 | -0.96476 |
| N | -0.95503 | -2.51417 | -1.49075 |
| C | 0.07834  | -3.43202 | -1.61908 |
| C | 1.21127  | -2.83136 | -1.15189 |
| N | 0.86652  | -1.54197 | -0.77563 |
| B | 1.62399  | -0.46789 | 0.06703  |
| N | 1.46488  | 0.96413  | -0.51814 |
| C | 0.26840  | 1.60636  | -0.51508 |
| N | 0.49446  | 2.88989  | -0.87910 |

|    |          |          |          |
|----|----------|----------|----------|
| C  | 1.85166  | 3.04667  | -1.15698 |
| C  | 2.45488  | 1.84944  | -0.92654 |
| N  | 0.89172  | -0.48899 | 1.44324  |
| C  | -0.41012 | -0.09564 | 1.41863  |
| N  | -0.94091 | -0.39325 | 2.62791  |
| C  | 0.02327  | -1.01488 | 3.41038  |
| C  | 1.15924  | -1.09777 | 2.65807  |
| Co | -1.23064 | 0.39271  | -0.30057 |
| O  | -2.12228 | 0.88224  | -1.76031 |
| C  | -2.37327 | -2.75048 | -1.94432 |
| C  | -2.62366 | -4.26159 | -2.04395 |
| C  | -3.34281 | -2.14302 | -0.91945 |
| C  | -2.54120 | -2.08264 | -3.31808 |
| C  | -0.48869 | 4.03050  | -0.97022 |
| C  | 0.18974  | 5.29364  | -0.40984 |
| C  | -0.85906 | 4.22902  | -2.44778 |
| C  | -1.73556 | 3.72731  | -0.13156 |
| C  | -2.34302 | -0.14580 | 3.10083  |
| C  | -3.13032 | 0.60307  | 2.02387  |
| C  | -2.99788 | -1.50834 | 3.38011  |
| C  | -2.27402 | 0.71337  | 4.37392  |
| H  | -3.67998 | -4.42464 | -2.30678 |
| H  | -2.01832 | -4.73458 | -2.83338 |
| H  | -3.11670 | -2.49646 | 0.09934  |
| H  | -4.37146 | -2.44480 | -1.17075 |
| H  | -3.31840 | -1.04406 | -0.94845 |
| H  | -1.83270 | -2.50822 | -4.04799 |
| H  | -2.37266 | -0.99828 | -3.23360 |
| H  | -3.56536 | -2.25142 | -3.68907 |
| H  | 1.03018  | 5.63701  | -1.03246 |
| H  | 0.55358  | 5.12317  | 0.61668  |
| H  | -0.54771 | 6.11071  | -0.38446 |
| H  | 0.03617  | 4.41777  | -3.06242 |
| H  | -1.53590 | 5.09240  | -2.54898 |
| H  | -1.46311 | 3.46993  | 0.90500  |
| H  | -2.36980 | 4.62683  | -0.10627 |
| H  | -2.32987 | 2.91428  | -0.57000 |
| H  | -4.15749 | 0.77377  | 2.38112  |
| H  | -2.69333 | 1.59085  | 1.80800  |
| H  | -4.03500 | -1.35638 | 3.71840  |
| H  | -3.01548 | -2.12634 | 2.46764  |
| H  | -1.76164 | 1.66823  | 4.17146  |
| H  | -1.74531 | 0.19675  | 5.19050  |
| H  | -3.29542 | 0.93192  | 4.72332  |
| H  | -2.42719 | -4.76961 | -1.08531 |
| H  | -2.46361 | -2.06366 | 4.16727  |
| H  | -1.37943 | 3.34379  | -2.84699 |
| C  | 3.83281  | -1.17959 | -0.95294 |
| C  | 5.21351  | -1.31779 | -0.96612 |
| C  | 5.94557  | -0.96853 | 0.17356  |
| C  | 5.26426  | -0.46037 | 1.28414  |
| C  | 3.88189  | -0.34328 | 1.23685  |
| H  | 3.23221  | -1.39905 | -1.83618 |
| H  | 5.70226  | -1.68654 | -1.87065 |
| H  | 7.03435  | -1.07166 | 0.18819  |
| H  | 5.79397  | -0.14208 | 2.18475  |
| H  | 3.32253  | 0.09350  | 2.06382  |
| H  | -0.05597 | -4.43227 | -2.01827 |
| H  | 2.20912  | -3.24990 | -1.04885 |

|   |          |          |          |
|---|----------|----------|----------|
| H | 2.28232  | 3.98751  | -1.48633 |
| H | 3.50378  | 1.58088  | -1.02056 |
| H | -0.16439 | -1.34349 | 4.42945  |
| H | 2.11304  | -1.55451 | 2.90992  |
| H | -3.22768 | 0.01037  | 1.09703  |
| H | -1.61393 | 1.31893  | -2.46481 |
| N | 3.17169  | -0.73342 | 0.14749  |

**[L<sub>3</sub>Co<sup>III</sup>OH]<sup>+</sup> (S=2)**

75

p\_u4.out Energy: -1807047.4009226

|    |          |          |          |
|----|----------|----------|----------|
| C  | -0.42175 | -1.22067 | -1.01330 |
| N  | -0.85529 | -2.32373 | -1.66489 |
| C  | 0.13552  | -3.29521 | -1.64399 |
| C  | 1.20194  | -2.76630 | -0.97808 |
| N  | 0.86372  | -1.46655 | -0.62766 |
| B  | 1.60145  | -0.44190 | 0.28604  |
| N  | 1.48571  | 0.99365  | -0.31930 |
| C  | 0.28653  | 1.57428  | -0.57841 |
| N  | 0.53248  | 2.79661  | -1.10661 |
| C  | 1.89908  | 2.99336  | -1.18127 |
| C  | 2.49543  | 1.86418  | -0.68638 |
| N  | 0.86264  | -0.50860 | 1.65655  |
| C  | -0.42355 | -0.06403 | 1.74097  |
| N  | -0.87526 | -0.39005 | 2.97379  |
| C  | 0.10652  | -1.09303 | 3.65545  |
| C  | 1.18538  | -1.18406 | 2.82419  |
| Co | -1.28913 | 0.43218  | -0.07736 |
| O  | -3.07310 | 0.55156  | -0.17252 |
| C  | -2.22157 | -2.48606 | -2.28124 |
| C  | -2.22359 | -3.72285 | -3.18930 |
| C  | -3.24088 | -2.66291 | -1.14528 |
| C  | -2.52573 | -1.23665 | -3.12254 |
| C  | -0.53733 | 3.75011  | -1.57057 |
| C  | 0.11284  | 5.05565  | -2.04225 |
| C  | -1.28745 | 3.08785  | -2.73712 |
| C  | -1.47745 | 4.03790  | -0.39002 |
| C  | -2.26062 | -0.10122 | 3.49411  |
| C  | -2.61283 | 1.35866  | 3.16852  |
| C  | -3.23228 | -1.07929 | 2.81552  |
| C  | -2.28114 | -0.30326 | 5.01492  |
| H  | -3.20501 | -3.78961 | -3.68332 |
| H  | -1.45310 | -3.65439 | -3.97485 |
| H  | -2.97702 | -3.53055 | -0.51810 |
| H  | -4.24197 | -2.83564 | -1.57271 |
| H  | -3.28954 | -1.76152 | -0.51795 |
| H  | -1.75283 | -1.08617 | -3.89397 |
| H  | -2.58740 | -0.33458 | -2.49821 |
| H  | -3.49893 | -1.36404 | -3.62261 |
| H  | 0.78163  | 4.89565  | -2.90326 |
| H  | 0.67473  | 5.54876  | -1.23243 |
| H  | -0.68278 | 5.74428  | -2.36508 |
| H  | -0.59862 | 2.86104  | -3.56713 |
| H  | -2.07104 | 3.76774  | -3.10721 |
| H  | -0.91748 | 4.43580  | 0.47169  |
| H  | -2.23035 | 4.78205  | -0.69391 |
| H  | -2.01708 | 3.13448  | -0.06776 |



|   |          |          |          |
|---|----------|----------|----------|
| H | -3.59119 | 1.60072  | 3.61319  |
| H | -1.85946 | 2.04598  | 3.58686  |
| H | -4.25259 | -0.91067 | 3.19640  |
| H | -3.24528 | -0.92708 | 1.72677  |
| H | -1.53757 | 0.33439  | 5.52086  |
| H | -2.10938 | -1.35387 | 5.29882  |
| H | -3.27803 | -0.02473 | 5.38951  |
| H | -2.08009 | -4.65661 | -2.62215 |
| H | -2.94864 | -2.12261 | 3.03188  |
| H | -1.77178 | 2.14901  | -2.42589 |
| C | 3.83981  | -1.18062 | -0.67266 |
| C | 5.22127  | -1.31170 | -0.65165 |
| C | 5.92679  | -0.93196 | 0.49473  |
| C | 5.21826  | -0.40038 | 1.57703  |
| C | 3.83683  | -0.29235 | 1.49666  |
| H | 3.26188  | -1.42449 | -1.56412 |
| H | 5.73127  | -1.69898 | -1.53648 |
| H | 7.01546  | -1.02884 | 0.53601  |
| H | 5.72576  | -0.05631 | 2.48095  |
| H | 3.25749  | 0.15900  | 2.30200  |
| H | 0.02395  | -4.27548 | -2.09628 |
| H | 2.15309  | -3.23225 | -0.73259 |
| H | 2.35654  | 3.89833  | -1.56916 |
| H | 3.55480  | 1.64603  | -0.57972 |
| H | -0.01831 | -1.47050 | 4.66543  |
| H | 2.13543  | -1.68535 | 2.99188  |
| H | -2.69255 | 1.52643  | 2.08532  |
| H | -3.58287 | 1.25654  | -0.60835 |
| N | 3.15085  | -0.71388 | 0.40189  |

[L<sub>3</sub>Co<sup>II</sup>O]<sup>-</sup> (S = 1/2)

74

r\_u1.out Energy: -1806847.1216684

|    |          |          |          |
|----|----------|----------|----------|
| C  | -0.34263 | -1.00040 | -1.11553 |
| N  | -0.85021 | -1.86655 | -2.04341 |
| C  | 0.12542  | -2.79657 | -2.39747 |
| C  | 1.24734  | -2.48603 | -1.68581 |
| N  | 0.95372  | -1.36351 | -0.93170 |
| B  | 1.72952  | -0.57000 | 0.16825  |
| N  | 1.51993  | 0.94505  | -0.16071 |
| C  | 0.28425  | 1.47615  | -0.31386 |
| N  | 0.46540  | 2.78620  | -0.66998 |
| C  | 1.83451  | 3.05395  | -0.72363 |
| C  | 2.48659  | 1.90082  | -0.40502 |
| N  | 0.91114  | -0.86120 | 1.46734  |
| C  | -0.40416 | -0.51239 | 1.50027  |
| N  | -0.90595 | -1.02262 | 2.67031  |
| C  | 0.10273  | -1.71931 | 3.33339  |
| C  | 1.22795  | -1.62677 | 2.57250  |
| Co | -1.21608 | 0.37578  | 0.00755  |
| O  | -2.56451 | 1.25450  | 0.42522  |
| C  | -2.22399 | -1.77747 | -2.63368 |
| C  | -2.42723 | -2.90185 | -3.65762 |
| C  | -3.26367 | -1.91448 | -1.51087 |
| C  | -2.35239 | -0.41361 | -3.33240 |
| C  | -0.60257 | 3.81085  | -0.93935 |
| C  | 0.04192  | 5.09830  | -1.47501 |

|   |          |          |          |
|---|----------|----------|----------|
| C | -1.56904 | 3.26022  | -2.00051 |
| C | -1.33357 | 4.10793  | 0.37951  |
| C | -2.29801 | -0.85235 | 3.21986  |
| C | -2.53407 | 0.64412  | 3.47877  |
| C | -3.31138 | -1.41645 | 2.21240  |
| C | -2.43109 | -1.62530 | 4.54115  |
| H | -3.43865 | -2.80906 | -4.08320 |
| H | -1.70816 | -2.83719 | -4.49057 |
| H | -3.10135 | -2.84174 | -0.93702 |
| H | -4.27806 | -1.93910 | -1.94171 |
| H | -3.20963 | -1.05807 | -0.82212 |
| H | -1.60505 | -0.31760 | -4.13783 |
| H | -2.19707 | 0.40666  | -2.61516 |
| H | -3.35820 | -0.30494 | -3.77030 |
| H | 0.60615  | 4.92290  | -2.40620 |
| H | 0.70719  | 5.57199  | -0.73478 |
| H | -0.76136 | 5.81714  | -1.70002 |
| H | -1.02263 | 2.97695  | -2.91597 |
| H | -2.30880 | 4.03508  | -2.26099 |
| H | -0.61893 | 4.46401  | 1.14167  |
| H | -2.08601 | 4.89804  | 0.21493  |
| H | -1.84456 | 3.19748  | 0.73284  |
| H | -3.53308 | 0.78750  | 3.92444  |
| H | -1.78048 | 1.03323  | 4.18520  |
| H | -4.32407 | -1.37381 | 2.64632  |
| H | -3.30642 | -0.82022 | 1.29170  |
| H | -1.74582 | -1.24751 | 5.31747  |
| H | -2.26627 | -2.70765 | 4.40936  |
| H | -3.45792 | -1.48872 | 4.91455  |
| H | -2.34984 | -3.89869 | -3.19298 |
| H | -3.07817 | -2.46768 | 1.97249  |
| H | -2.10849 | 2.38719  | -1.60932 |
| C | 3.98745  | -1.11281 | -0.87440 |
| C | 5.35494  | -1.21897 | -0.82418 |
| C | 6.06593  | -1.03032 | 0.39414  |
| C | 5.29241  | -0.61004 | 1.51195  |
| C | 3.92566  | -0.51072 | 1.43496  |
| H | 3.44793  | -1.17616 | -1.81926 |
| H | 5.88839  | -1.42586 | -1.75797 |
| H | 7.15283  | -1.12272 | 0.44748  |
| H | 5.77548  | -0.32912 | 2.45380  |
| H | 3.33554  | -0.11765 | 2.26354  |
| H | -0.03881 | -3.59475 | -3.11396 |
| H | 2.21370  | -2.98355 | -1.66583 |
| H | 2.23970  | 4.02658  | -0.97975 |
| H | 3.55105  | 1.68825  | -0.33692 |
| H | -0.04334 | -2.21993 | 4.28375  |
| H | 2.21642  | -2.04713 | 2.73881  |
| H | -2.48732 | 1.20124  | 2.52988  |
| N | 3.20904  | -0.87292 | 0.27529  |

[L<sub>3</sub>Co<sup>II</sup>O]<sup>-</sup> (S = 3/2)

74

r\_u3.out Energy: -1806843.4922917

|   |          |          |          |
|---|----------|----------|----------|
| C | -0.39059 | -0.92717 | -1.34195 |
|---|----------|----------|----------|

|    |          |          |          |
|----|----------|----------|----------|
| N  | -0.84690 | -1.85394 | -2.22736 |
| C  | 0.10266  | -2.86071 | -2.38591 |
| C  | 1.16534  | -2.53023 | -1.59813 |
| N  | 0.86917  | -1.32130 | -0.99034 |
| B  | 1.66335  | -0.56143 | 0.13705  |
| N  | 1.53956  | 0.96416  | -0.16436 |
| C  | 0.32487  | 1.53643  | -0.28770 |
| N  | 0.52793  | 2.85350  | -0.55249 |
| C  | 1.90262  | 3.10325  | -0.59481 |
| C  | 2.53007  | 1.91573  | -0.35052 |
| N  | 0.85530  | -0.83904 | 1.45902  |
| C  | -0.40608 | -0.34090 | 1.62184  |
| N  | -0.87416 | -0.86245 | 2.78808  |
| C  | 0.06975  | -1.73414 | 3.32624  |
| C  | 1.14100  | -1.72737 | 2.48266  |
| Co | -1.20759 | 0.38729  | -0.06761 |
| O  | -2.86316 | 0.35438  | -0.06883 |
| C  | -2.20486 | -1.85433 | -2.86273 |
| C  | -2.18256 | -2.74874 | -4.11128 |
| C  | -3.20912 | -2.39602 | -1.83199 |
| C  | -2.56668 | -0.41814 | -3.27147 |
| C  | -0.57450 | 3.83932  | -0.77782 |
| C  | 0.01673  | 5.23216  | -1.02469 |
| C  | -1.37838 | 3.38686  | -2.00859 |
| C  | -1.46460 | 3.86681  | 0.47594  |
| C  | -2.23589 | -0.61577 | 3.36496  |
| C  | -2.58370 | 0.87233  | 3.20532  |
| C  | -3.24078 | -1.49477 | 2.60217  |
| C  | -2.23040 | -0.97972 | 4.85717  |
| H  | -3.15867 | -2.67369 | -4.61576 |
| H  | -1.40321 | -2.42955 | -4.82359 |
| H  | -2.93223 | -3.41838 | -1.52198 |
| H  | -4.21989 | -2.42896 | -2.27274 |
| H  | -3.22588 | -1.73195 | -0.95367 |
| H  | -1.78911 | 0.01066  | -3.92576 |
| H  | -2.68901 | 0.21400  | -2.38067 |
| H  | -3.52130 | -0.42854 | -3.82298 |
| H  | 0.65354  | 5.25406  | -1.92426 |
| H  | 0.60408  | 5.58590  | -0.16132 |
| H  | -0.80927 | 5.94316  | -1.18268 |
| H  | -0.73094 | 3.34220  | -2.90029 |
| H  | -2.19939 | 4.09581  | -2.20454 |
| H  | -0.87497 | 4.14389  | 1.36570  |
| H  | -2.27341 | 4.60426  | 0.34560  |
| H  | -1.92522 | 2.88212  | 0.65244  |
| H  | -3.54379 | 1.07578  | 3.70772  |
| H  | -1.80715 | 1.50726  | 3.66408  |
| H  | -4.25287 | -1.35679 | 3.01891  |
| H  | -3.25056 | -1.20222 | 1.54049  |
| H  | -1.45316 | -0.42266 | 5.40690  |
| H  | -2.08168 | -2.05868 | 5.02576  |
| H  | -3.20927 | -0.71606 | 5.28754  |
| H  | -2.02587 | -3.81141 | -3.86443 |
| H  | -2.97017 | -2.56077 | 2.69397  |
| H  | -1.81656 | 2.38967  | -1.84475 |
| C  | 3.88616  | -1.12655 | -0.95631 |
| C  | 5.25171  | -1.26228 | -0.93614 |
| C  | 5.98647  | -1.16045 | 0.27829  |
| C  | 5.23869  | -0.79876 | 1.43378  |

|   |          |          |          |
|---|----------|----------|----------|
| C | 3.87327  | -0.66812 | 1.38688  |
| H | 3.32743  | -1.13362 | -1.89255 |
| H | 5.76524  | -1.42607 | -1.88949 |
| H | 7.07214  | -1.27563 | 0.30679  |
| H | 5.74177  | -0.59032 | 2.38397  |
| H | 3.30469  | -0.32324 | 2.25093  |
| H | -0.03553 | -3.71439 | -3.04194 |
| H | 2.10298  | -3.05766 | -1.43969 |
| H | 2.32269  | 4.08485  | -0.79003 |
| H | 3.58965  | 1.67552  | -0.29447 |
| H | -0.07773 | -2.27552 | 4.25546  |
| H | 2.07785  | -2.27587 | 2.54539  |
| H | -2.68878 | 1.12975  | 2.14214  |
| N | 3.13005  | -0.94020 | 0.21955  |

**[L<sub>3</sub>Co<sup>II</sup>O]<sup>-</sup> (S=5/2)**

74

r\_u5.out Energy: -1806840.7684551

|    |          |          |          |
|----|----------|----------|----------|
| C  | -0.43730 | -1.00871 | -1.31008 |
| N  | -0.86910 | -1.99212 | -2.14142 |
| C  | 0.13051  | -2.94360 | -2.31304 |
| C  | 1.19896  | -2.52487 | -1.57256 |
| N  | 0.84963  | -1.31806 | -0.98757 |
| B  | 1.61755  | -0.49891 | 0.11747  |
| N  | 1.46642  | 1.03631  | -0.18944 |
| C  | 0.27690  | 1.67789  | -0.33582 |
| N  | 0.56784  | 2.98044  | -0.57456 |
| C  | 1.94955  | 3.16481  | -0.58251 |
| C  | 2.50772  | 1.94406  | -0.33926 |
| N  | 0.84098  | -0.83265 | 1.45458  |
| C  | -0.44707 | -0.42552 | 1.61722  |
| N  | -0.89200 | -1.00208 | 2.76251  |
| C  | 0.10168  | -1.80630 | 3.30563  |
| C  | 1.18045  | -1.70936 | 2.47066  |
| Co | -1.34217 | 0.42533  | -0.07532 |
| O  | -2.86816 | 1.07507  | -0.39630 |
| C  | -2.24395 | -2.02907 | -2.73666 |
| C  | -2.33819 | -3.18061 | -3.74524 |
| C  | -3.26134 | -2.23853 | -1.60184 |
| C  | -2.49981 | -0.68840 | -3.44492 |
| C  | -0.47740 | 4.02859  | -0.80078 |
| C  | 0.19309  | 5.39048  | -1.01673 |
| C  | -1.28953 | 3.63479  | -2.04616 |
| C  | -1.38622 | 4.08119  | 0.43960  |
| C  | -2.27299 | -0.79020 | 3.30399  |
| C  | -2.50528 | 0.72328  | 3.44837  |
| C  | -3.28557 | -1.39771 | 2.31774  |
| C  | -2.39997 | -1.47098 | 4.67203  |
| H  | -3.33941 | -3.16712 | -4.20358 |
| H  | -1.59556 | -3.07680 | -4.55379 |
| H  | -3.01934 | -3.14409 | -1.02036 |
| H  | -4.27352 | -2.35360 | -2.02407 |
| H  | -3.26803 | -1.36634 | -0.93056 |
| H  | -1.74017 | -0.50938 | -4.22451 |
| H  | -2.47875 | 0.13920  | -2.71914 |
| H  | -3.49351 | -0.70683 | -3.92272 |

|   |          |          |          |
|---|----------|----------|----------|
| H | 0.84494  | 5.39140  | -1.90614 |
| H | 0.78543  | 5.70041  | -0.13964 |
| H | -0.59012 | 6.14809  | -1.17659 |
| H | -0.62987 | 3.54204  | -2.92579 |
| H | -2.04657 | 4.40851  | -2.25805 |
| H | -0.79431 | 4.28910  | 1.34713  |
| H | -2.13381 | 4.88304  | 0.31892  |
| H | -1.91937 | 3.12547  | 0.56116  |
| H | -3.51138 | 0.90761  | 3.85959  |
| H | -1.76041 | 1.16864  | 4.12900  |
| H | -4.30201 | -1.33327 | 2.73999  |
| H | -3.27869 | -0.84637 | 1.36449  |
| H | -1.66597 | -1.07605 | 5.39386  |
| H | -2.27839 | -2.56438 | 4.60007  |
| H | -3.40640 | -1.27441 | 5.07335  |
| H | -2.20733 | -4.16379 | -3.26362 |
| H | -3.05394 | -2.45779 | 2.12101  |
| H | -1.80606 | 2.67806  | -1.87143 |
| C | 3.84967  | -1.01434 | -0.98917 |
| C | 5.21692  | -1.13236 | -0.97736 |
| C | 5.95741  | -1.02402 | 0.23314  |
| C | 5.21173  | -0.67166 | 1.39274  |
| C | 3.84438  | -0.55889 | 1.35365  |
| H | 3.28655  | -1.02245 | -1.92281 |
| H | 5.72696  | -1.28624 | -1.93420 |
| H | 7.04456  | -1.12570 | 0.25533  |
| H | 5.71753  | -0.45517 | 2.33967  |
| H | 3.27833  | -0.21446 | 2.21950  |
| H | 0.02374  | -3.82628 | -2.93604 |
| H | 2.16882  | -2.99553 | -1.43049 |
| H | 2.42806  | 4.12374  | -0.75594 |
| H | 3.55474  | 1.66076  | -0.26339 |
| H | -0.01465 | -2.37454 | 4.22356  |
| H | 2.15042  | -2.19636 | 2.53686  |
| H | -2.43411 | 1.22392  | 2.46999  |
| N | 3.09749  | -0.83971 | 0.19091  |

[L<sub>3</sub>Co<sup>II</sup>OH] (S = 1/2)

75

h\_u1.out Energy: -1807171.0519584

|   |          |          |          |
|---|----------|----------|----------|
| C | 0.35127  | -0.63467 | 1.32670  |
| N | 0.85086  | -1.27835 | 2.42357  |
| C | -0.12765 | -2.10681 | 2.96814  |
| C | -1.24631 | -1.96213 | 2.20287  |
| N | -0.95281 | -1.02127 | 1.22363  |
| B | -1.65143 | -0.50039 | -0.05514 |
| N | -1.48842 | 1.04150  | -0.10090 |
| C | -0.25795 | 1.61924  | 0.04088  |
| N | -0.47953 | 2.96668  | 0.05269  |
| C | -1.83954 | 3.22595  | -0.10719 |
| C | -2.46709 | 2.02258  | -0.19981 |
| N | -0.91521 | -1.20178 | -1.22783 |
| C | 0.42684  | -0.95775 | -1.36636 |
| N | 0.85943  | -1.84524 | -2.30945 |
| C | -0.18932 | -2.66054 | -2.72328 |
| C | -1.29398 | -2.27028 | -2.03035 |

|    |          |          |          |
|----|----------|----------|----------|
| Co | 1.21303  | 0.38493  | -0.04950 |
| O  | 2.59173  | 1.13103  | -1.06332 |
| C  | 2.21531  | -1.03882 | 2.99195  |
| C  | 2.48340  | -2.02642 | 4.13473  |
| C  | 3.26388  | -1.24291 | 1.88848  |
| C  | 2.25976  | 0.40381  | 3.52318  |
| C  | 0.57721  | 4.02607  | 0.12424  |
| C  | -0.05768 | 5.36532  | 0.52906  |
| C  | 1.61374  | 3.63434  | 1.18819  |
| C  | 1.21751  | 4.14694  | -1.26869 |
| C  | 2.25260  | -1.90762 | -2.86784 |
| C  | 2.49481  | -0.62500 | -3.67986 |
| C  | 3.25283  | -2.01755 | -1.70785 |
| C  | 2.39277  | -3.13848 | -3.77487 |
| H  | 3.49876  | -1.85006 | 4.52241  |
| H  | 1.78157  | -1.88933 | 4.97326  |
| H  | 3.15755  | -2.23421 | 1.42069  |
| H  | 4.27571  | -1.16038 | 2.31708  |
| H  | 3.18216  | -0.47480 | 1.10139  |
| H  | 1.50418  | 0.55221  | 4.31264  |
| H  | 2.05955  | 1.12130  | 2.71236  |
| H  | 3.25463  | 0.62373  | 3.94366  |
| H  | -0.60176 | 5.28396  | 1.48475  |
| H  | -0.74323 | 5.75341  | -0.24112 |
| H  | 0.74341  | 6.11041  | 0.65451  |
| H  | 1.13247  | 3.48802  | 2.16899  |
| H  | 2.36611  | 4.43370  | 1.28115  |
| H  | 0.46517  | 4.46096  | -2.01174 |
| H  | 2.02493  | 4.89786  | -1.25378 |
| H  | 1.63272  | 3.17557  | -1.57713 |
| H  | 3.49827  | -0.66027 | -4.13769 |
| H  | 1.74980  | -0.53596 | -4.48944 |
| H  | 4.26772  | -2.16596 | -2.11254 |
| H  | 3.25684  | -1.09349 | -1.11577 |
| H  | 1.73207  | -3.08593 | -4.65570 |
| H  | 2.19252  | -4.07693 | -3.23095 |
| H  | 3.42880  | -3.18012 | -4.14551 |
| H  | 2.43033  | -3.07212 | 3.78928  |
| H  | 3.00809  | -2.87569 | -1.05967 |
| H  | 2.13614  | 2.70547  | 0.92085  |
| C  | -3.93350 | -0.75855 | 1.06584  |
| C  | -5.31970 | -0.84751 | 1.06404  |
| C  | -5.99803 | -0.90746 | -0.15700 |
| C  | -5.25828 | -0.84732 | -1.34224 |
| C  | -3.87402 | -0.75901 | -1.27300 |
| H  | -3.37241 | -0.66256 | 1.99492  |
| H  | -5.85323 | -0.85703 | 2.01712  |
| H  | -7.08910 | -0.97930 | -0.18492 |
| H  | -5.74263 | -0.85635 | -2.32121 |
| H  | -3.26355 | -0.66679 | -2.17162 |
| H  | 0.03334  | -2.73117 | 3.84114  |
| H  | -2.20036 | -2.47697 | 2.28683  |
| H  | -2.25846 | 4.22655  | -0.13670 |
| H  | -3.52711 | 1.81273  | -0.31953 |
| H  | -0.08682 | -3.44849 | -3.46211 |
| H  | -2.29396 | -2.69660 | -2.05010 |
| H  | 2.44128  | 0.25094  | -3.01364 |
| H  | 2.93432  | 1.98533  | -0.76282 |
| N  | -3.21850 | -0.75289 | -0.08531 |

[L<sub>3</sub>Co<sup>II</sup>OH] (S=3/2)

75

h\_u3.out Energy: -1807177.1344705

|    |          |          |          |
|----|----------|----------|----------|
| C  | 0.40945  | -0.63303 | 1.51225  |
| N  | 0.85176  | -1.40225 | 2.53817  |
| C  | -0.14103 | -2.29004 | 2.93871  |
| C  | -1.22492 | -2.05020 | 2.14663  |
| N  | -0.89297 | -0.99664 | 1.30008  |
| B  | -1.61452 | -0.44975 | 0.02856  |
| N  | -1.51890 | 1.10208  | -0.06080 |
| C  | -0.31732 | 1.74686  | -0.10485 |
| N  | -0.59502 | 3.06921  | -0.18491 |
| C  | -1.97260 | 3.27159  | -0.19229 |
| C  | -2.54984 | 2.03911  | -0.11574 |
| N  | -0.89676 | -1.12878 | -1.17626 |
| C  | 0.40814  | -0.79277 | -1.42403 |
| N  | 0.84235  | -1.66029 | -2.37218 |
| C  | -0.15567 | -2.57749 | -2.68318 |
| C  | -1.23665 | -2.25685 | -1.91686 |
| Co | 1.24523  | 0.47590  | -0.01593 |
| O  | 3.05446  | 0.93720  | -0.17756 |
| C  | 2.23904  | -1.30645 | 3.10132  |
| C  | 2.34321  | -2.17674 | 4.35949  |
| C  | 3.23675  | -1.78858 | 2.03525  |
| C  | 2.51284  | 0.16345  | 3.45920  |
| C  | 0.47372  | 4.11923  | -0.22328 |
| C  | -0.16777 | 5.50309  | -0.37311 |
| C  | 1.26323  | 4.04119  | 1.09433  |
| C  | 1.39894  | 3.83157  | -1.41801 |
| C  | 2.23352  | -1.64330 | -2.93271 |
| C  | 2.55364  | -0.21141 | -3.39208 |
| C  | 3.20215  | -2.08216 | -1.82315 |
| C  | 2.31891  | -2.60507 | -4.12421 |
| H  | 3.34953  | -2.05646 | 4.78992  |
| H  | 1.60988  | -1.87652 | 5.12639  |
| H  | 2.97062  | -2.79675 | 1.67610  |
| H  | 4.25018  | -1.82944 | 2.46803  |
| H  | 3.25710  | -1.09036 | 1.18384  |
| H  | 1.77002  | 0.53856  | 4.18270  |
| H  | 2.47904  | 0.79177  | 2.55622  |
| H  | 3.51662  | 0.25611  | 3.90490  |
| H  | -0.82375 | 5.74778  | 0.47864  |
| H  | -0.74844 | 5.58371  | -1.30702 |
| H  | 0.62974  | 6.26157  | -0.40745 |
| H  | 0.60082  | 4.20504  | 1.96068  |
| H  | 2.05429  | 4.80870  | 1.10610  |
| H  | 0.82079  | 3.78424  | -2.35604 |
| H  | 2.14511  | 4.63827  | -1.50884 |
| H  | 1.93677  | 2.88043  | -1.27469 |
| H  | 3.55235  | -0.19146 | -3.85890 |
| H  | 1.81469  | 0.13356  | -4.13484 |
| H  | 4.22867  | -2.13466 | -2.22252 |
| H  | 3.19198  | -1.35330 | -0.99972 |
| H  | 1.59753  | -2.33989 | -4.91513 |

|   |          |          |          |
|---|----------|----------|----------|
| H | 2.15205  | -3.65276 | -3.82419 |
| H | 3.33040  | -2.54361 | -4.55504 |
| H | 2.20681  | -3.24692 | 4.13253  |
| H | 2.92762  | -3.07768 | -1.43515 |
| H | 1.73791  | 3.05245  | 1.19563  |
| C | -3.85600 | -0.70991 | 1.22363  |
| C | -5.23870 | -0.83241 | 1.26983  |
| C | -5.95131 | -0.97526 | 0.07530  |
| C | -5.24912 | -0.96170 | -1.13381 |
| C | -3.86609 | -0.83627 | -1.11301 |
| H | -3.26806 | -0.55293 | 2.12809  |
| H | -5.74329 | -0.80246 | 2.23810  |
| H | -7.04052 | -1.07474 | 0.08544  |
| H | -5.76200 | -1.03549 | -2.09535 |
| H | -3.28638 | -0.77799 | -2.03436 |
| H | -0.01986 | -3.01150 | 3.74096  |
| H | -2.18451 | -2.56201 | 2.13410  |
| H | -2.43969 | 4.24997  | -0.25181 |
| H | -3.60672 | 1.78477  | -0.09942 |
| H | -0.03907 | -3.37313 | -3.41256 |
| H | -2.19907 | -2.75940 | -1.85391 |
| H | 2.56309  | 0.48063  | -2.53644 |
| H | 3.40521  | 1.57073  | 0.46677  |
| N | -3.17576 | -0.75066 | 0.05113  |

**[L<sub>3</sub>Co<sup>II</sup>OH] (S=5/2)**

75

h\_u5.out Energy: -1807132.6979396

|    |          |          |          |
|----|----------|----------|----------|
| C  | 0.40433  | -0.64090 | 1.52575  |
| N  | 0.84717  | -1.34329 | 2.59649  |
| C  | -0.15191 | -2.20845 | 3.02408  |
| C  | -1.22499 | -2.01448 | 2.20196  |
| N  | -0.88216 | -1.02078 | 1.30158  |
| B  | -1.67253 | -0.53057 | 0.02912  |
| N  | -1.51386 | 1.04547  | -0.06202 |
| C  | -0.32129 | 1.68266  | -0.09737 |
| N  | -0.57057 | 3.01491  | -0.16504 |
| C  | -1.93897 | 3.21699  | -0.17388 |
| C  | -2.52689 | 1.97719  | -0.11000 |
| N  | -0.88102 | -1.16106 | -1.17940 |
| C  | 0.40480  | -0.80447 | -1.44208 |
| N  | 0.85116  | -1.61869 | -2.42936 |
| C  | -0.14419 | -2.52790 | -2.76024 |
| C  | -1.21971 | -2.24763 | -1.96530 |
| Co | 1.24509  | 0.44622  | -0.02736 |
| O  | 3.02636  | 0.69741  | -0.03367 |
| C  | 2.23045  | -1.24799 | 3.17758  |
| C  | 2.26158  | -1.95839 | 4.53715  |
| C  | 3.20506  | -1.92785 | 2.20282  |
| C  | 2.58421  | 0.23573  | 3.36756  |
| C  | 0.50296  | 4.06420  | -0.19141 |
| C  | -0.13755 | 5.45180  | -0.30358 |
| C  | 1.30329  | 3.95795  | 1.11733  |
| C  | 1.40317  | 3.80369  | -1.40991 |
| C  | 2.23588  | -1.58236 | -3.01305 |
| C  | 2.57494  | -0.12913 | -3.38283 |



|   |          |          |          |
|---|----------|----------|----------|
| C | 3.20950  | -2.12998 | -1.95759 |
| C | 2.28032  | -2.45439 | -4.27445 |
| H | 3.26286  | -1.82937 | 4.97625  |
| H | 1.52555  | -1.52972 | 5.23716  |
| H | 2.91981  | -2.97995 | 2.03672  |
| H | 4.22507  | -1.90492 | 2.62007  |
| H | 3.21991  | -1.40122 | 1.23765  |
| H | 1.82726  | 0.74326  | 3.98779  |
| H | 2.66632  | 0.75270  | 2.40125  |
| H | 3.56055  | 0.31462  | 3.87220  |
| H | -0.78178 | 5.67738  | 0.56169  |
| H | -0.72685 | 5.55542  | -1.22924 |
| H | 0.66273  | 6.20728  | -0.32922 |
| H | 0.64730  | 4.10229  | 1.99122  |
| H | 2.09054  | 4.72837  | 1.13687  |
| H | 0.81438  | 3.80401  | -2.34151 |
| H | 2.17162  | 4.59002  | -1.47830 |
| H | 1.92013  | 2.83503  | -1.32605 |
| H | 3.55820  | -0.10063 | -3.87937 |
| H | 1.82198  | 0.28366  | -4.07417 |
| H | 4.23327  | -2.14337 | -2.36580 |
| H | 3.20822  | -1.49402 | -1.06096 |
| H | 1.54757  | -2.11964 | -5.02707 |
| H | 2.10512  | -3.51893 | -4.05008 |
| H | 3.28420  | -2.37474 | -4.71931 |
| H | 2.08185  | -3.04160 | 4.44487  |
| H | 2.93451  | -3.15861 | -1.67093 |
| H | 1.78818  | 2.97277  | 1.21006  |
| C | -3.89093 | -0.74479 | 1.24002  |
| C | -5.25660 | -0.87643 | 1.25914  |
| C | -5.99582 | -1.08274 | 0.06232  |
| C | -5.25735 | -1.01863 | -1.15087 |
| C | -3.89167 | -0.88530 | -1.14824 |
| H | -3.33026 | -0.50730 | 2.14442  |
| H | -5.76628 | -0.78901 | 2.22422  |
| H | -7.08136 | -1.20041 | 0.06960  |
| H | -5.76763 | -1.04542 | -2.11921 |
| H | -3.33189 | -0.75516 | -2.07473 |
| H | -0.04019 | -2.88137 | 3.86824  |
| H | -2.19587 | -2.50340 | 2.20246  |
| H | -2.39958 | 4.19894  | -0.22444 |
| H | -3.57992 | 1.70498  | -0.09682 |
| H | -0.02881 | -3.28975 | -3.52456 |
| H | -2.18933 | -2.73642 | -1.91355 |
| H | 2.63413  | 0.51033  | -2.49054 |
| H | 3.46042  | 1.56638  | 0.00675  |
| N | -3.14037 | -0.86926 | 0.04880  |

## 5. Thermodynamic cycle for the $\text{L}_4\text{Co}^{\text{III}}\text{O}$ oxidant

$[\text{L}_4\text{Co}^{\text{III}}\text{O}] (S=0)$

83

o\_u0\_opt.out Energy: -2326435.7453302

|    |          |          |          |
|----|----------|----------|----------|
| C  | 1.28135  | -0.59586 | 1.44445  |
| N  | 1.63045  | -1.36471 | 2.51130  |
| C  | 0.55842  | -2.19114 | 2.83909  |
| C  | -0.49495 | -1.84719 | 2.01087  |
| N  | -0.05233 | -0.79947 | 1.21272  |
| B  | -0.66308 | -0.04209 | -0.00275 |
| N  | -0.20663 | 1.44674  | 0.02848  |
| C  | 1.13704  | 1.69342  | 0.04324  |
| N  | 1.30742  | 3.03943  | 0.06609  |
| C  | 0.06009  | 3.65912  | 0.06355  |
| C  | -0.89358 | 2.65802  | 0.03912  |
| N  | -0.04485 | -0.74758 | -1.24500 |
| C  | 1.28830  | -0.52716 | -1.46466 |
| N  | 1.64410  | -1.25146 | -2.55994 |
| C  | 0.57902  | -2.07269 | -2.92137 |
| C  | -0.47826 | -1.76771 | -2.08294 |
| Co | 2.30773  | 0.15962  | 0.01149  |
| O  | 3.60539  | -0.90293 | -0.01585 |
| C  | 2.95234  | -1.32951 | 3.27368  |
| C  | 2.63784  | -1.34290 | 4.78066  |
| C  | 3.76991  | -2.55003 | 2.83433  |
| C  | 3.70355  | -0.02579 | 2.96720  |
| C  | 2.62976  | 3.78080  | 0.08758  |
| C  | 2.68590  | 4.62102  | 1.37382  |
| C  | 3.78571  | 2.77828  | 0.09298  |
| C  | 2.71429  | 4.64378  | -1.18180 |
| C  | 2.96447  | -1.17205 | -3.32081 |
| C  | 3.70318  | 0.12406  | -2.95779 |
| C  | 3.79376  | -2.40311 | -2.93627 |
| C  | 2.64792  | -1.12304 | -4.82663 |
| H  | 3.58321  | -1.21468 | 5.32954  |
| H  | 1.96863  | -0.50922 | 5.05040  |
| H  | 3.25681  | -3.49364 | 3.08337  |
| H  | 4.74134  | -2.54398 | 3.35432  |
| H  | 3.94177  | -2.49884 | 1.74727  |
| H  | 3.05200  | 0.85355  | 3.10302  |
| H  | 4.11898  | -0.02067 | 1.95250  |
| H  | 4.53971  | 0.05634  | 3.67829  |
| H  | 2.58858  | 3.97422  | 2.26111  |
| H  | 1.90419  | 5.39404  | 1.41073  |
| H  | 3.65918  | 5.13383  | 1.42307  |
| H  | 3.76912  | 2.13639  | 0.98604  |
| H  | 4.72909  | 3.34543  | 0.11883  |
| H  | 1.93298  | 5.41729  | -1.22164 |
| H  | 3.68846  | 5.15705  | -1.20076 |
| H  | 2.63633  | 4.01283  | -2.08238 |
| H  | 4.53895  | 0.24485  | -3.66383 |
| H  | 3.04378  | 1.00273  | -3.05427 |
| H  | 4.76374  | -2.36597 | -3.45767 |
| H  | 3.96783  | -2.39799 | -1.84838 |
| H  | 1.97259  | -0.28331 | -5.05976 |
| H  | 2.21095  | -2.05268 | -5.21361 |
| H  | 3.59164  | -0.96511 | -5.37060 |
| H  | 2.19510  | -2.28514 | 5.12848  |
| H  | 3.28831  | -3.33954 | -3.22490 |
| H  | 3.80439  | 2.16213  | -0.81824 |
| C  | -2.92266 | 0.03332  | 1.16773  |
| C  | -4.31525 | 0.10221  | 1.21324  |
| C  | -5.04274 | 0.12969  | 0.00059  |

|   |          |          |          |
|---|----------|----------|----------|
| C | -4.31832 | 0.12425  | -1.21400 |
| C | -2.92533 | 0.05745  | -1.17301 |
| H | 4.11775  | 0.08829  | -1.94331 |
| N | -2.25104 | -0.03168 | -0.00440 |
| C | 0.53963  | -3.26977 | 3.76169  |
| N | 0.46155  | -4.18895 | 4.47046  |
| C | -1.75635 | -2.48786 | 1.92271  |
| N | -2.79473 | -3.00565 | 1.82677  |
| C | 0.57158  | -3.11607 | -3.88381 |
| N | 0.50432  | -4.00859 | -4.62693 |
| C | -1.73416 | -2.42125 | -2.01636 |
| N | -2.76862 | -2.94931 | -1.93483 |
| C | -2.29661 | 2.85538  | 0.02807  |
| N | -3.44944 | 3.01608  | 0.01916  |
| C | -0.20747 | 5.05257  | 0.08106  |
| N | -0.47363 | 6.18500  | 0.09372  |
| C | -4.97918 | 0.19783  | -2.48171 |
| N | -5.50908 | 0.25404  | -3.51343 |
| C | -6.47009 | 0.19288  | 0.00291  |
| N | -7.63071 | 0.24499  | 0.00480  |
| C | -4.97314 | 0.15510  | 2.48352  |
| N | -5.50078 | 0.19523  | 3.51715  |
| H | -2.34233 | 0.11438  | -2.09253 |
| H | -2.33719 | 0.06655  | 2.08713  |

[L4Co<sup>III</sup>O] (S=1)

83

| o_u2_opt.out | Energy: -2326433.8551336 |          |          |
|--------------|--------------------------|----------|----------|
| C            | -1.27521                 | -0.52518 | -1.55194 |
| N            | -1.58594                 | -1.30572 | -2.61497 |
| C            | -0.50916                 | -2.14154 | -2.89970 |
| C            | 0.51163                  | -1.80151 | -2.02970 |
| N            | 0.04552                  | -0.74704 | -1.25015 |
| B            | 0.63696                  | -0.01824 | 0.00145  |
| N            | 0.16517                  | 1.46533  | 0.00549  |
| C            | -1.17804                 | 1.69747  | 0.00443  |
| N            | -1.37533                 | 3.03438  | 0.00753  |
| C            | -0.13853                 | 3.67621  | 0.01079  |
| C            | 0.83202                  | 2.69049  | 0.00980  |
| N            | 0.04361                  | -0.75425 | 1.24769  |
| C            | -1.27757                 | -0.53335 | 1.54864  |
| N            | -1.59025                 | -1.31929 | 2.60709  |
| C            | -0.51437                 | -2.15728 | 2.88889  |
| C            | 0.50782                  | -1.81328 | 2.02211  |
| Co           | -2.30845                 | 0.11397  | -0.00082 |
| O            | -3.52645                 | -0.99293 | -0.00467 |
| C            | -2.89128                 | -1.27437 | -3.39677 |
| C            | -2.55110                 | -1.21933 | -4.89649 |
| C            | -3.68646                 | -2.53144 | -3.01980 |
| C            | -3.67997                 | -0.00867 | -3.03717 |
| C            | -2.72228                 | 3.72695  | 0.00693  |
| C            | -2.82416                 | 4.57737  | -1.26888 |
| C            | -3.82896                 | 2.66838  | 0.00341  |
| C            | -2.82805                 | 4.57263  | 1.28555  |
| C            | -2.89668                 | -1.29128 | 3.38725  |
| C            | -3.68451                 | -0.02363 | 3.03270  |

|   |          |          |          |
|---|----------|----------|----------|
| C | -3.69183 | -2.54623 | 3.00319  |
| C | -2.55847 | -1.24345 | 4.88766  |
| H | -3.49005 | -1.10903 | -5.46048 |
| H | -1.91036 | -0.35077 | -5.12149 |
| H | -3.14663 | -3.45361 | -3.29042 |
| H | -4.64588 | -2.53048 | -3.56152 |
| H | -3.88551 | -2.52515 | -1.93650 |
| H | -3.06777 | 0.89882  | -3.16589 |
| H | -4.06008 | -0.05457 | -2.00903 |
| H | -4.54104 | 0.05712  | -3.71995 |
| H | -2.70855 | 3.94531  | -2.16455 |
| H | -2.07262 | 5.38041  | -1.30118 |
| H | -3.81720 | 5.05209  | -1.30431 |
| H | -3.79804 | 2.04480  | -0.90379 |
| H | -4.80199 | 3.18320  | 0.00305  |
| H | -2.07672 | 5.37561  | 1.32326  |
| H | -3.82124 | 5.04716  | 1.31961  |
| H | -2.71523 | 3.93727  | 2.17925  |
| H | -4.54646 | 0.03907  | 3.71467  |
| H | -3.07222 | 0.88304  | 3.16667  |
| H | -4.65197 | -2.54748 | 3.54364  |
| H | -3.88944 | -2.53464 | 1.91966  |
| H | -1.91768 | -0.37623 | 5.11758  |
| H | -2.06914 | -2.15615 | 5.25369  |
| H | -3.49810 | -1.13539 | 5.45095  |
| H | -2.06092 | -2.13010 | -5.26616 |
| H | -3.15276 | -3.46991 | 3.27011  |
| H | -3.80038 | 2.04130  | 0.90827  |
| C | 2.89786  | 0.10280  | -1.16895 |
| C | 4.28988  | 0.18461  | -1.21261 |
| C | 5.01627  | 0.20360  | 0.00084  |
| C | 4.29111  | 0.17593  | 1.21486  |
| C | 2.89906  | 0.09381  | 1.17221  |
| H | -4.06336 | -0.06448 | 2.00389  |
| N | 2.22654  | 0.01457  | 0.00169  |
| C | -0.46253 | -3.20705 | -3.83615 |
| N | -0.37553 | -4.11024 | -4.56424 |
| C | 1.77026  | -2.44137 | -1.90417 |
| N | 2.80702  | -2.95744 | -1.78439 |
| C | -0.46978 | -3.22775 | 3.81975  |
| N | -0.38442 | -4.13487 | 4.54312  |
| C | 1.76595  | -2.45378 | 1.89465  |
| N | 2.80214  | -2.97065 | 1.77336  |
| C | 2.23224  | 2.90618  | 0.01377  |
| N | 3.38319  | 3.07984  | 0.01735  |
| C | 0.09456  | 5.07559  | 0.01485  |
| N | 0.32425  | 6.21600  | 0.01806  |
| C | 4.95084  | 0.23927  | 2.48372  |
| N | 5.48012  | 0.28771  | 3.51616  |
| C | 6.44310  | 0.27774  | 0.00040  |
| N | 7.60330  | 0.33867  | 0.00004  |
| C | 4.94818  | 0.25617  | -2.48177 |
| N | 5.47626  | 0.31107  | -3.51451 |
| H | 2.31167  | 0.14106  | -2.08781 |
| H | 2.31408  | 0.12440  | 2.09206  |

[L<sub>4</sub>Co<sup>III</sup>O] (S=2)

83

o\_u4.out Energy: -2327548.5303866

|    |          |          |          |
|----|----------|----------|----------|
| C  | 1.27538  | -0.38033 | 1.62002  |
| N  | 1.58769  | -1.02486 | 2.76332  |
| C  | 0.48520  | -1.78208 | 3.15481  |
| C  | -0.52147 | -1.54516 | 2.23404  |
| N  | -0.02807 | -0.62011 | 1.32515  |
| B  | -0.66227 | -0.03293 | 0.00623  |
| N  | -0.10743 | 1.43956  | -0.16783 |
| C  | 1.22301  | 1.69376  | -0.17538 |
| N  | 1.41467  | 3.02147  | -0.34319 |
| C  | 0.16745  | 3.62925  | -0.46319 |
| C  | -0.78746 | 2.63356  | -0.34687 |
| N  | -0.03637 | -0.90373 | -1.14910 |
| C  | 1.26571  | -0.72589 | -1.49494 |
| N  | 1.57533  | -1.59923 | -2.47531 |
| C  | 0.47489  | -2.42544 | -2.69315 |
| C  | -0.52802 | -2.00454 | -1.83648 |
| Co | 2.37072  | 0.08694  | -0.00436 |
| O  | 3.21367  | -1.32346 | 0.14244  |
| C  | 2.90522  | -0.96175 | 3.52930  |
| C  | 2.58402  | -0.59288 | 4.98795  |
| C  | 3.58446  | -2.33254 | 3.40293  |
| C  | 3.80097  | 0.13423  | 2.94286  |
| C  | 2.73101  | 3.78186  | -0.40467 |
| C  | 2.71304  | 4.85844  | 0.69415  |
| C  | 3.89676  | 2.83237  | -0.13583 |
| C  | 2.86179  | 4.37918  | -1.81444 |
| C  | 2.88024  | -1.68546 | -3.25848 |
| C  | 3.80108  | -0.52618 | -2.86843 |
| C  | 3.54815  | -3.02536 | -2.91933 |
| C  | 2.53375  | -1.55506 | -4.75181 |
| H  | 3.53257  | -0.49485 | 5.53802  |
| H  | 2.05215  | 0.37105  | 5.03919  |
| H  | 2.98743  | -3.13571 | 3.86217  |
| H  | 4.55626  | -2.29968 | 3.92019  |
| H  | 3.75704  | -2.57419 | 2.34191  |
| H  | 3.27894  | 1.10317  | 2.89115  |
| H  | 4.19471  | -0.13689 | 1.95225  |
| H  | 4.66978  | 0.25449  | 3.60738  |
| H  | 2.55986  | 4.40020  | 1.68463  |
| H  | 1.94059  | 5.62298  | 0.53258  |
| H  | 3.68612  | 5.37341  | 0.69655  |
| H  | 3.84343  | 2.39731  | 0.87302  |
| H  | 4.82813  | 3.41842  | -0.17119 |
| H  | 2.06394  | 5.10218  | -2.04053 |
| H  | 3.82247  | 4.91241  | -1.88684 |
| H  | 2.84622  | 3.58249  | -2.57612 |
| H  | 4.64384  | -0.50527 | -3.57559 |
| H  | 3.28404  | 0.44508  | -2.93067 |
| H  | 4.51693  | -3.08207 | -3.44012 |
| H  | 3.72702  | -3.09544 | -1.83431 |
| H  | 2.02583  | -0.59735 | -4.95094 |
| H  | 1.90312  | -2.37576 | -5.12121 |
| H  | 3.46984  | -1.57902 | -5.33079 |
| H  | 1.98873  | -1.35689 | 5.50616  |
| H  | 2.94525  | -3.88808 | -3.24117 |
| H  | 4.00358  | 2.05980  | -0.91268 |
| C  | -2.86890 | 0.29783  | 1.19126  |

|   |          |          |          |
|---|----------|----------|----------|
| C | -4.23676 | 0.37462  | 1.23902  |
| C | -5.03231 | 0.18693  | 0.04681  |
| C | -4.28120 | 0.04083  | -1.18029 |
| C | -2.91221 | -0.02557 | -1.16302 |
| H | 4.22788  | -0.66218 | -1.86387 |
| N | -2.17903 | 0.00052  | 0.01872  |
| C | 0.40676  | -2.68414 | 4.24756  |
| N | 0.29456  | -3.45271 | 5.11315  |
| C | -1.78153 | -2.19719 | 2.17945  |
| N | -2.79000 | -2.77504 | 2.14397  |
| C | 0.39430  | -3.52770 | -3.58322 |
| N | 0.28279  | -4.44883 | -4.28434 |
| C | -1.77892 | -2.64360 | -1.63095 |
| N | -2.77903 | -3.21217 | -1.46142 |
| C | -2.18833 | 2.85283  | -0.40660 |
| N | -3.32030 | 3.11185  | -0.46487 |
| C | -0.09972 | 5.00485  | -0.68567 |
| N | -0.37445 | 6.11831  | -0.87872 |
| C | -4.94884 | -0.01073 | -2.44535 |
| N | -5.49306 | -0.05653 | -3.47216 |
| C | -6.43848 | 0.20803  | 0.06984  |
| N | -7.60850 | 0.22405  | 0.08905  |
| C | -4.85881 | 0.66482  | 2.49538  |
| N | -5.36612 | 0.89558  | 3.51611  |
| H | -2.27234 | 0.49814  | 2.08164  |
| H | -2.35070 | -0.06545 | -2.09620 |

[L4Co<sup>III</sup>OH]<sup>+</sup> (S=0)

84

|              |                          |          |          |
|--------------|--------------------------|----------|----------|
| p_u0_opt.out | Energy: -2326706.7896995 |          |          |
| C            | -1.25909                 | -0.80591 | -1.33184 |
| N            | -1.76671                 | -1.85082 | -2.02597 |
| C            | -0.71066                 | -2.67525 | -2.40137 |
| C            | 0.44302                  | -2.14125 | -1.85575 |
| N            | 0.08664                  | -0.95347 | -1.22205 |
| B            | 0.70735                  | -0.06637 | -0.09269 |
| N            | 0.37804                  | 1.42712  | -0.37602 |
| C            | -0.91419                 | 1.83167  | -0.37678 |
| N            | -0.96014                 | 3.18261  | -0.49347 |
| C            | 0.34785                  | 3.63461  | -0.66449 |
| C            | 1.18688                  | 2.54284  | -0.57288 |
| N            | -0.08741                 | -0.53137 | 1.18079  |
| C            | -1.42922                 | -0.24269 | 1.24691  |
| N            | -1.91365                 | -0.83286 | 2.37077  |
| C            | -0.90186                 | -1.58461 | 2.96390  |
| C            | 0.23522                  | -1.41900 | 2.19741  |
| Co           | -2.22677                 | 0.51180  | -0.41488 |
| O            | -2.99182                 | 1.20280  | -1.89003 |
| C            | -3.25737                 | -2.15733 | -2.18333 |
| C            | -3.47878                 | -3.67591 | -2.22550 |
| C            | -3.94257                 | -1.61913 | -0.92242 |
| C            | -3.76626                 | -1.48826 | -3.46320 |
| C            | -2.15530                 | 4.14915  | -0.37195 |
| C            | -1.75303                 | 5.27473  | 0.59909  |
| C            | -2.47133                 | 4.67060  | -1.77791 |
| C            | -3.36518                 | 3.43569  | 0.23123  |

|   |          |          |          |
|---|----------|----------|----------|
| C | -3.29873 | -0.68164 | 2.99878  |
| C | -4.13813 | 0.29797  | 2.18370  |
| C | -3.97674 | -2.05936 | 3.03223  |
| C | -3.10292 | -0.09686 | 4.40920  |
| H | -4.55932 | -3.85729 | -2.12053 |
| H | -3.17507 | -4.12041 | -3.18197 |
| H | -3.49846 | -2.04927 | -0.01392 |
| H | -5.01052 | -1.88559 | -0.93342 |
| H | -3.95975 | -0.51331 | -0.89677 |
| H | -3.20978 | -1.85398 | -4.34109 |
| H | -3.67293 | -0.39607 | -3.39257 |
| H | -4.82892 | -1.74477 | -3.59937 |
| H | -0.97811 | 5.94443  | 0.20624  |
| H | -1.42006 | 4.86114  | 1.56481  |
| H | -2.64311 | 5.89540  | 0.78238  |
| H | -1.61207 | 5.18944  | -2.23132 |
| H | -3.30250 | 5.39009  | -1.71183 |
| H | -3.11067 | 2.97770  | 1.20105  |
| H | -4.14196 | 4.19054  | 0.42386  |
| H | -3.79113 | 2.69218  | -0.45188 |
| H | -5.11539 | 0.40788  | 2.67683  |
| H | -3.67488 | 1.29339  | 2.14846  |
| H | -4.98025 | -1.94559 | 3.47048  |
| H | -4.09179 | -2.47264 | 2.01837  |
| H | -2.56656 | 0.86443  | 4.36072  |
| H | -2.56110 | -0.77443 | 5.08402  |
| H | -4.09414 | 0.08129  | 4.85388  |
| H | -2.96792 | -4.19274 | -1.39696 |
| H | -3.42976 | -2.78758 | 3.64800  |
| H | -2.78079 | 3.84096  | -2.43165 |
| C | 3.04447  | -0.38450 | -1.03833 |
| C | 4.43414  | -0.46628 | -0.95038 |
| C | 5.05760  | -0.25140 | 0.30017  |
| C | 4.23883  | 0.07559  | 1.40821  |
| C | 2.85536  | 0.11464  | 1.24268  |
| H | -4.34297 | -0.06236 | 1.16679  |
| H | -2.40568 | 1.47022  | -2.61899 |
| N | 2.27239  | -0.16444 | 0.05083  |
| C | -0.99681 | -2.40781 | 4.11638  |
| N | -1.01159 | -3.10373 | 5.04784  |
| C | 1.46868  | -2.10032 | 2.36394  |
| N | 2.47544  | -2.67059 | 2.48546  |
| C | 2.59965  | 2.58322  | -0.67816 |
| N | 3.75852  | 2.63992  | -0.75980 |
| C | 0.77785  | 4.95145  | -0.97741 |
| N | 1.21141  | 5.98773  | -1.27730 |
| C | 1.72399  | -2.74820 | -1.89523 |
| N | 2.76196  | -3.27332 | -1.91993 |
| C | -0.74718 | -3.82359 | -3.23551 |
| N | -0.67717 | -4.75121 | -3.93251 |
| C | 4.79762  | 0.36481  | 2.69388  |
| N | 5.24317  | 0.59657  | 3.74080  |
| C | 6.47717  | -0.32705 | 0.43461  |
| N | 7.63218  | -0.38871 | 0.54462  |
| C | 5.19073  | -0.74675 | -2.13219 |
| N | 5.79690  | -0.97844 | -3.09504 |
| H | 2.20883  | 0.40498  | 2.07186  |
| H | 2.55525  | -0.44528 | -2.00934 |

[L4Co<sup>III</sup>OH]<sup>+</sup> (S=1)

84

p\_u2\_opt.out      Energy: -2326693.6804305

|    |          |          |          |
|----|----------|----------|----------|
| C  | -1.33448 | -1.08761 | -1.19269 |
| N  | -1.74196 | -2.21305 | -1.81949 |
| C  | -0.64293 | -3.04928 | -1.98437 |
| C  | 0.44620  | -2.41333 | -1.41471 |
| N  | 0.00974  | -1.16463 | -0.97542 |
| B  | 0.64238  | -0.06867 | -0.03142 |
| N  | 0.36217  | 1.41346  | -0.48983 |
| C  | -0.89587 | 1.93403  | -0.45165 |
| N  | -0.83965 | 3.25900  | -0.70308 |
| C  | 0.48629  | 3.59472  | -0.96588 |
| C  | 1.24042  | 2.44764  | -0.82607 |
| N  | -0.13501 | -0.31369 | 1.30924  |
| C  | -1.47053 | -0.03462 | 1.28419  |
| N  | -2.02420 | -0.50773 | 2.42292  |
| C  | -1.03935 | -1.15417 | 3.16467  |
| C  | 0.13778  | -1.06799 | 2.44393  |
| Co | -2.25472 | 0.56686  | -0.44922 |
| O  | -2.91762 | 1.02226  | -2.02817 |
| C  | -3.16198 | -2.48176 | -2.33016 |
| C  | -3.42473 | -3.99273 | -2.38614 |
| C  | -4.16604 | -1.85601 | -1.35705 |
| C  | -3.25777 | -1.84609 | -3.72347 |
| C  | -1.96875 | 4.29601  | -0.65010 |
| C  | -1.54237 | 5.39743  | 0.33629  |
| C  | -2.18072 | 4.83438  | -2.07173 |
| C  | -3.25375 | 3.65586  | -0.12792 |
| C  | -3.47893 | -0.39952 | 2.86156  |
| C  | -4.27452 | 0.36555  | 1.80617  |
| C  | -4.04336 | -1.82195 | 3.00224  |
| C  | -3.51511 | 0.38245  | 4.18424  |
| H  | -4.49935 | -4.13873 | -2.57228 |
| H  | -2.89333 | -4.48840 | -3.20840 |
| H  | -4.00759 | -2.22028 | -0.33030 |
| H  | -5.17971 | -2.15246 | -1.66573 |
| H  | -4.15108 | -0.75873 | -1.39307 |
| H  | -2.51999 | -2.28978 | -4.41183 |
| H  | -3.09635 | -0.75919 | -3.66130 |
| H  | -4.26395 | -2.03088 | -4.13249 |
| H  | -0.67145 | 5.97407  | -0.00344 |
| H  | -1.32528 | 4.96923  | 1.32807  |
| H  | -2.37724 | 6.10701  | 0.44239  |
| H  | -1.28090 | 5.31806  | -2.48024 |
| H  | -2.98268 | 5.58841  | -2.04849 |
| H  | -3.11075 | 3.23774  | 0.88069  |
| H  | -4.01569 | 4.44573  | -0.05042 |
| H  | -3.64895 | 2.88873  | -0.80790 |
| H  | -5.32049 | 0.43609  | 2.14117  |
| H  | -3.91602 | 1.39764  | 1.68446  |
| H  | -5.11004 | -1.75271 | 3.26540  |
| H  | -3.95501 | -2.37501 | 2.05352  |
| H  | -3.07075 | 1.38282  | 4.05777  |
| H  | -2.99340 | -0.13928 | 4.99953  |
| H  | -4.56532 | 0.50432  | 4.49130  |



|   |          |          |          |
|---|----------|----------|----------|
| H | -3.17926 | -4.48922 | -1.43327 |
| H | -3.54659 | -2.39940 | 3.79500  |
| H | -2.49024 | 4.02977  | -2.75811 |
| C | 2.95239  | -0.54212 | -0.97969 |
| C | 4.34253  | -0.64154 | -0.91469 |
| C | 4.99957  | -0.31618 | 0.29340  |
| C | 4.21452  | 0.14414  | 1.37833  |
| C | 2.82980  | 0.20996  | 1.23511  |
| H | -4.30974 | -0.16535 | 0.84065  |
| H | -2.46197 | 1.69274  | -2.56814 |
| N | 2.21136  | -0.18372 | 0.09479  |
| C | -1.19419 | -1.80000 | 4.41880  |
| N | -1.26410 | -2.34190 | 5.44511  |
| C | 1.36741  | -1.69531 | 2.77084  |
| N | 2.37208  | -2.22280 | 3.02732  |
| C | 2.64552  | 2.40044  | -1.00574 |
| N | 3.79906  | 2.41121  | -1.15465 |
| C | 0.99570  | 4.86276  | -1.35170 |
| N | 1.47115  | 5.86788  | -1.69144 |
| C | 1.72165  | -3.00852 | -1.23816 |
| N | 2.75055  | -3.52933 | -1.08177 |
| C | -0.56258 | -4.32476 | -2.60465 |
| N | -0.37404 | -5.35937 | -3.10021 |
| C | 4.80786  | 0.54424  | 2.61795  |
| N | 5.28098  | 0.86539  | 3.62853  |
| C | 6.42014  | -0.41235 | 0.40415  |
| N | 7.57590  | -0.49010 | 0.49410  |
| C | 5.06661  | -1.05267 | -2.07802 |
| N | 5.64648  | -1.39005 | -3.02574 |
| H | 2.21314  | 0.61926  | 2.03572  |
| H | 2.43445  | -0.70281 | -1.92522 |

**[L<sub>4</sub>Co<sup>III</sup>OH]<sup>+</sup> (S=2)**

84

p\_u4.out Energy: -2327813.7361380

|    |          |          |          |
|----|----------|----------|----------|
| C  | -1.30914 | -0.88936 | -1.29531 |
| N  | -1.67921 | -1.97742 | -2.01455 |
| C  | -0.65822 | -2.91816 | -1.96830 |
| C  | 0.36693  | -2.36912 | -1.21768 |
| N  | -0.02883 | -1.08070 | -0.86763 |
| B  | 0.60304  | -0.05864 | 0.13824  |
| N  | 0.35754  | 1.42830  | -0.31654 |
| C  | -0.89220 | 1.94071  | -0.49365 |
| N  | -0.79197 | 3.23509  | -0.86868 |
| C  | 0.55221  | 3.56781  | -0.95308 |
| C  | 1.27669  | 2.44154  | -0.60479 |
| N  | -0.14944 | -0.38324 | 1.48351  |
| C  | -1.47196 | -0.05978 | 1.57775  |
| N  | -1.95598 | -0.58738 | 2.72273  |
| C  | -0.95800 | -1.33382 | 3.33376  |
| C  | 0.17108  | -1.22985 | 2.53847  |
| Co | -2.38016 | 0.57019  | -0.19335 |
| O  | -3.91949 | 0.97919  | -0.94741 |
| C  | -3.01507 | -2.08532 | -2.76062 |
| C  | -3.00865 | -3.28595 | -3.71161 |
| C  | -4.12349 | -2.26545 | -1.71427 |
| C  | -3.17504 | -0.79943 | -3.58457 |

|   |          |          |          |
|---|----------|----------|----------|
| C | -1.99987 | 4.12743  | -1.18656 |
| C | -1.56343 | 5.58052  | -1.38989 |
| C | -2.63032 | 3.58938  | -2.47844 |
| C | -2.95656 | 4.06081  | 0.01183  |
| C | -3.36114 | -0.41183 | 3.28529  |
| C | -4.13214 | 0.58334  | 2.42057  |
| C | -4.05282 | -1.78274 | 3.26072  |
| C | -3.23282 | 0.16076  | 4.70715  |
| H | -3.93733 | -3.23936 | -4.30063 |
| H | -2.16839 | -3.25240 | -4.42286 |
| H | -3.92323 | -3.13991 | -1.07445 |
| H | -5.08018 | -2.42941 | -2.23473 |
| H | -4.23878 | -1.37302 | -1.08600 |
| H | -2.36100 | -0.70949 | -4.32191 |
| H | -3.19416 | 0.09711  | -2.95379 |
| H | -4.13152 | -0.84664 | -4.12817 |
| H | -0.93741 | 5.71340  | -2.28374 |
| H | -1.05091 | 5.99461  | -0.50766 |
| H | -2.47658 | 6.17446  | -1.54774 |
| H | -1.90821 | 3.63095  | -3.30983 |
| H | -3.49521 | 4.21934  | -2.74007 |
| H | -2.44374 | 4.34656  | 0.94404  |
| H | -3.78511 | 4.76491  | -0.16005 |
| H | -3.40031 | 3.06547  | 0.12907  |
| H | -5.11504 | 0.75353  | 2.88550  |
| H | -3.62336 | 1.55839  | 2.35574  |
| H | -5.08095 | -1.66783 | 3.63764  |
| H | -4.09941 | -2.17595 | 2.23189  |
| H | -2.68614 | 1.11744  | 4.69602  |
| H | -2.73375 | -0.52811 | 5.40293  |
| H | -4.24460 | 0.34364  | 5.10051  |
| H | -3.01199 | -4.24910 | -3.18199 |
| H | -3.54538 | -2.51982 | 3.90110  |
| H | -2.98785 | 2.55842  | -2.35678 |
| C | 2.90698  | -0.57718 | -0.81289 |
| C | 4.29415  | -0.70308 | -0.74949 |
| C | 4.95677  | -0.41538 | 0.46670  |
| C | 4.18023  | 0.02943  | 1.56268  |
| C | 2.79691  | 0.12887  | 1.41923  |
| H | -4.33553 | 0.18696  | 1.41505  |
| H | -4.84898 | 1.03643  | -0.65971 |
| N | 2.17285  | -0.21800 | 0.26736  |
| C | -1.06410 | -2.10589 | 4.52028  |
| N | -1.09963 | -2.76332 | 5.47848  |
| C | 1.38807  | -1.93360 | 2.72978  |
| N | 2.37555  | -2.52948 | 2.88165  |
| C | 2.69298  | 2.41044  | -0.57297 |
| N | 3.85598  | 2.44095  | -0.56436 |
| C | 1.16739  | 4.79653  | -1.31748 |
| N | 1.78124  | 5.74216  | -1.60016 |
| C | 1.54407  | -3.04060 | -0.80013 |
| N | 2.49848  | -3.59954 | -0.43801 |
| C | -0.60590 | -4.23278 | -2.50585 |
| N | -0.45558 | -5.32183 | -2.88338 |
| C | 4.78096  | 0.38629  | 2.81175  |
| N | 5.26070  | 0.67356  | 3.82940  |
| C | 6.37539  | -0.53690 | 0.57397  |
| N | 7.52997  | -0.63427 | 0.66017  |
| C | 5.01337  | -1.10647 | -1.91917 |

|   |         |          |          |
|---|---------|----------|----------|
| N | 5.58946 | -1.43775 | -2.87135 |
| H | 2.18644 | 0.52619  | 2.23136  |
| H | 2.38226 | -0.73427 | -1.75616 |

[L<sub>4</sub>Co<sup>II</sup>O] (S = 1/2)

83

r\_u1\_opt.out      Energy: -2326545.6036514

|    |          |          |          |
|----|----------|----------|----------|
| C  | 1.36114  | -0.24174 | 1.34771  |
| N  | 1.84960  | -0.90294 | 2.43391  |
| C  | 0.83686  | -1.68072 | 2.99133  |
| C  | -0.30940 | -1.44458 | 2.25193  |
| N  | 0.02076  | -0.50407 | 1.28940  |
| B  | -0.70911 | -0.02767 | -0.01574 |
| N  | -0.33023 | 1.47833  | -0.26428 |
| C  | 0.96717  | 1.88650  | -0.25322 |
| N  | 0.99095  | 3.24983  | -0.35107 |
| C  | -0.32227 | 3.69720  | -0.47925 |
| C  | -1.14784 | 2.58847  | -0.41839 |
| N  | -0.01242 | -0.92593 | -1.09961 |
| C  | 1.33010  | -0.76639 | -1.30045 |
| N  | 1.75078  | -1.80020 | -2.09954 |
| C  | 0.67520  | -2.65675 | -2.31904 |
| C  | -0.41935 | -2.12253 | -1.66268 |
| Co | 2.27241  | 0.54995  | -0.23924 |
| O  | 3.54636  | 1.04785  | -1.15932 |
| C  | 3.27162  | -0.86435 | 2.95337  |
| C  | 3.23352  | -0.55324 | 4.46019  |
| C  | 3.92219  | -2.22350 | 2.65561  |
| C  | 4.04196  | 0.25704  | 2.25537  |
| C  | 2.24474  | 4.12583  | -0.33441 |
| C  | 1.87528  | 5.58561  | -0.03995 |
| C  | 3.17204  | 3.63584  | 0.78899  |
| C  | 2.90519  | 4.01677  | -1.71486 |
| C  | 3.16344  | -1.96853 | -2.67008 |
| C  | 3.44558  | -0.74903 | -3.55867 |
| C  | 4.15099  | -2.10277 | -1.50045 |
| C  | 3.26178  | -3.23516 | -3.52757 |
| H  | 4.26778  | -0.45175 | 4.82411  |
| H  | 2.70677  | 0.39709  | 4.64559  |
| H  | 3.40840  | -3.05135 | 3.16907  |
| H  | 4.96779  | -2.20984 | 3.00172  |
| H  | 3.91661  | -2.42004 | 1.57144  |
| H  | 3.53103  | 1.22388  | 2.37326  |
| H  | 4.20129  | 0.06242  | 1.18470  |
| H  | 5.03661  | 0.33699  | 2.72052  |
| H  | 1.29280  | 5.69161  | 0.88974  |
| H  | 1.33912  | 6.06586  | -0.86929 |
| H  | 2.81592  | 6.14136  | 0.09299  |
| H  | 2.63239  | 3.58076  | 1.74881  |
| H  | 3.99749  | 4.35635  | 0.89838  |
| H  | 2.21734  | 4.36744  | -2.50263 |
| H  | 3.80411  | 4.65489  | -1.73287 |
| H  | 3.20372  | 2.97489  | -1.90963 |
| H  | 4.45310  | -0.85393 | -3.99346 |
| H  | 2.71582  | -0.70227 | -4.38452 |
| H  | 5.14776  | -2.33754 | -1.90649 |

|   |          |          |          |
|---|----------|----------|----------|
| H | 4.23447  | -1.17033 | -0.93110 |
| H | 2.58372  | -3.21510 | -4.39383 |
| H | 3.10240  | -4.15721 | -2.94862 |
| H | 4.28789  | -3.27433 | -3.92414 |
| H | 2.75732  | -1.34525 | 5.05415  |
| H | 3.84965  | -2.92640 | -0.83220 |
| H | 3.61457  | 2.66151  | 0.55459  |
| C | -2.92494 | 0.11910  | 1.19489  |
| C | -4.29367 | 0.07011  | 1.26513  |
| C | -5.08503 | -0.22637 | 0.09050  |
| C | -4.33825 | -0.34094 | -1.14377 |
| C | -2.96858 | -0.27879 | -1.14316 |
| H | 3.41566  | 0.17852  | -2.96845 |
| N | -2.22962 | -0.14860 | 0.02393  |
| C | -0.82756 | 5.01025  | -0.67463 |
| N | -1.35843 | 6.03050  | -0.85023 |
| C | -2.56117 | 2.65343  | -0.51425 |
| N | -3.71264 | 2.79528  | -0.60404 |
| C | -1.54431 | -2.12858 | 2.39931  |
| N | -2.53173 | -2.73018 | 2.52979  |
| C | 0.94639  | -2.60542 | 4.06127  |
| N | 0.98779  | -3.39201 | 4.91799  |
| C | -1.66672 | -2.78048 | -1.50187 |
| N | -2.65416 | -3.38180 | -1.36970 |
| C | 0.59824  | -3.88995 | -3.02093 |
| N | 0.39930  | -4.90592 | -3.55155 |
| C | -5.01293 | -0.49789 | -2.39532 |
| N | -5.56523 | -0.63110 | -3.41056 |
| C | -6.48577 | -0.33317 | 0.13510  |
| N | -7.65272 | -0.42328 | 0.17274  |
| C | -4.92159 | 0.33619  | 2.52301  |
| N | -5.43485 | 0.54636  | 3.54566  |
| H | -2.33406 | 0.40064  | 2.06682  |
| H | -2.41206 | -0.30072 | -2.08052 |

[L<sub>4</sub>Co<sup>II</sup>O]<sup>-</sup> (S = 3/2)

83

r\_u3\_opt.out Energy: -2326545.6993090

|    |          |          |          |
|----|----------|----------|----------|
| C  | 1.27266  | -0.53399 | 1.55241  |
| N  | 1.58283  | -1.31399 | 2.61722  |
| C  | 0.50430  | -2.15143 | 2.89704  |
| C  | -0.51225 | -1.80899 | 2.02063  |
| N  | -0.04344 | -0.75817 | 1.24588  |
| B  | -0.67568 | -0.02731 | -0.00032 |
| N  | -0.15895 | 1.45903  | 0.00177  |
| C  | 1.18043  | 1.69543  | 0.00260  |
| N  | 1.37549  | 3.03371  | 0.00416  |
| C  | 0.13356  | 3.66955  | 0.00421  |
| C  | -0.83069 | 2.67530  | 0.00261  |
| N  | -0.04285 | -0.75467 | -1.24819 |
| C  | 1.27352  | -0.52980 | -1.55307 |
| N  | 1.58441  | -1.30676 | -2.61988 |
| C  | 0.50605  | -2.14333 | -2.90286 |
| C  | -0.51115 | -1.80323 | -2.02630 |
| Co | 2.30616  | 0.10942  | 0.00083  |
| O  | 3.55314  | -0.96717 | -0.00024 |

|   |          |          |          |
|---|----------|----------|----------|
| C | 2.88486  | -1.28363 | 3.39696  |
| C | 2.54919  | -1.24088 | 4.89832  |
| C | 3.68647  | -2.53428 | 3.01058  |
| C | 3.67050  | -0.01309 | 3.04595  |
| C | 2.71536  | 3.73172  | 0.00506  |
| C | 2.81764  | 4.58225  | -1.27123 |
| C | 2.81656  | 4.58140  | 1.28199  |
| C | 3.82956  | 2.68078  | 0.00530  |
| C | 2.88698  | -1.27424 | -3.39866 |
| C | 3.67241  | -0.00464 | -3.04370 |
| C | 3.68828  | -2.52598 | -3.01521 |
| C | 2.55235  | -1.22739 | -4.90012 |
| H | 3.48871  | -1.13009 | 5.46154  |
| H | 1.90455  | -0.37700 | 5.13039  |
| H | 3.14916  | -3.46049 | 3.27260  |
| H | 4.64635  | -2.53496 | 3.55183  |
| H | 3.88440  | -2.51650 | 1.92705  |
| H | 3.05561  | 0.89147  | 3.18233  |
| H | 4.04554  | -0.05073 | 2.01549  |
| H | 4.53353  | 0.04992  | 3.72686  |
| H | 2.06075  | 5.38013  | -1.30682 |
| H | 2.70744  | 3.94820  | -2.16629 |
| H | 3.80810  | 5.06277  | -1.30508 |
| H | 2.05993  | 5.37950  | 1.31739  |
| H | 3.80714  | 5.06158  | 1.31711  |
| H | 3.80148  | 2.05352  | -0.89930 |
| H | 4.79939  | 3.20189  | 0.00626  |
| H | 3.80008  | 2.05264  | 0.90922  |
| H | 4.53560  | 0.06043  | -3.72421 |
| H | 3.05748  | 0.90026  | -3.17755 |
| H | 4.64852  | -2.52523 | -3.55581 |
| H | 3.88548  | -2.51125 | -1.93151 |
| H | 1.90768  | -0.36302 | -5.13027 |
| H | 2.06635  | -2.14165 | -5.26673 |
| H | 3.49225  | -1.11487 | -5.46234 |
| H | 2.06273  | -2.15604 | 5.26207  |
| H | 3.15107  | -3.45142 | -3.28017 |
| H | 2.70531  | 3.94681  | 2.17653  |
| C | -2.91245 | 0.10842  | 1.18562  |
| C | -4.28133 | 0.18619  | 1.22211  |
| C | -5.05703 | 0.17738  | 0.00029  |
| C | -4.28176 | 0.18810  | -1.22180 |
| C | -2.91286 | 0.11039  | -1.18592 |
| H | 4.04720  | -0.04529 | -2.01327 |
| N | -2.20418 | -0.01937 | -0.00039 |
| C | -0.10561 | 5.06690  | 0.00568  |
| N | -0.33520 | 6.20789  | 0.00680  |
| C | -2.23077 | 2.90327  | 0.00200  |
| N | -3.36735 | 3.15222  | 0.00151  |
| C | -1.75807 | -2.47522 | 1.88447  |
| N | -2.76120 | -3.05540 | 1.77962  |
| C | 0.45836  | -3.22075 | 3.82797  |
| N | 0.37723  | -4.12657 | 4.55422  |
| C | -1.75715 | -2.46970 | -1.89313 |
| N | -2.76047 | -3.05004 | -1.79094 |
| C | 0.46073  | -3.21015 | -3.83669 |
| N | 0.38003  | -4.11408 | -4.56533 |
| C | -4.92476 | 0.30175  | -2.49495 |
| N | -5.45137 | 0.39006  | -3.52859 |

|   |          |         |          |
|---|----------|---------|----------|
| C | -6.46187 | 0.21565 | 0.00058  |
| N | -7.63255 | 0.24702 | 0.00081  |
| C | -4.92390 | 0.29787 | 2.49565  |
| N | -5.45018 | 0.38463 | 3.52959  |
| H | -2.33009 | 0.17732 | -2.10480 |
| H | -2.32931 | 0.17350 | 2.10439  |

[L<sub>4</sub>Co<sup>II</sup>O] (S = 5/2)

83

|              |                          |          |          |
|--------------|--------------------------|----------|----------|
| r_u5_opt.out | Energy: -2326529.7339181 |          |          |
| C            | -1.36417                 | -0.43606 | -1.57114 |
| N            | -1.78231                 | -1.34393 | -2.48466 |
| C            | -0.78602                 | -2.29148 | -2.68899 |
| C            | 0.28882                  | -1.91603 | -1.89839 |
| N            | -0.06488                 | -0.73098 | -1.26730 |
| B            | 0.63350                  | 0.01592  | -0.06368 |
| N            | 0.21965                  | 1.54448  | -0.06463 |
| C            | -1.06248                 | 1.97582  | 0.11616  |
| N            | -1.06609                 | 3.32930  | 0.05686  |
| C            | 0.22548                  | 3.77893  | -0.19412 |
| C            | 1.03361                  | 2.65682  | -0.27841 |
| N            | 0.03401                  | -0.72765 | 1.20149  |
| C            | -1.29053                 | -0.60472 | 1.49977  |
| N            | -1.57091                 | -1.47832 | 2.50009  |
| C            | -0.42895                 | -2.21137 | 2.80356  |
| C            | 0.57607                  | -1.75459 | 1.96360  |
| Co           | -2.42859                 | 0.43635  | 0.06752  |
| O            | -4.02183                 | 0.84414  | 0.41127  |
| C            | -3.15065                 | -1.35769 | -3.13946 |
| C            | -2.96271                 | -1.51883 | -4.65772 |
| C            | -3.94375                 | -2.51930 | -2.52231 |
| C            | -3.86360                 | -0.02602 | -2.87594 |
| C            | -2.33908                 | 4.14624  | 0.23351  |
| C            | -2.03401                 | 5.64633  | 0.24008  |
| C            | -3.26853                 | 3.81421  | -0.94453 |
| C            | -2.95686                 | 3.74846  | 1.58288  |
| C            | -2.96297                 | -1.59644 | 3.10740  |
| C            | -3.39536                 | -0.18863 | 3.54530  |
| C            | -3.89576                 | -2.17156 | 2.02871  |
| C            | -2.95137                 | -2.52437 | 4.32519  |
| H            | -3.95078                 | -1.46191 | -5.14002 |
| H            | -2.33513                 | -0.70659 | -5.05955 |
| H            | -3.47031                 | -3.49425 | -2.72110 |
| H            | -4.95692                 | -2.54034 | -2.95397 |
| H            | -4.03098                 | -2.38172 | -1.43160 |
| H            | -3.24022                 | 0.83303  | -3.17061 |
| H            | -4.15728                 | 0.09943  | -1.82414 |
| H            | -4.78342                 | -0.01091 | -3.48116 |
| H            | -1.64107                 | 6.00247  | -0.72383 |
| H            | -1.34126                 | 5.92929  | 1.04796  |
| H            | -2.98252                 | 6.17528  | 0.42067  |
| H            | -2.77513                 | 4.03939  | -1.90458 |
| H            | -4.17833                 | 4.43133  | -0.86861 |
| H            | -2.25322                 | 3.95398  | 2.40657  |
| H            | -3.86813                 | 4.34566  | 1.74711  |
| H            | -3.23817                 | 2.68708  | 1.59282  |

|   |          |          |          |
|---|----------|----------|----------|
| H | -4.38724 | -0.25367 | 4.02055  |
| H | -2.68424 | 0.22500  | 4.27928  |
| H | -4.89264 | -2.33625 | 2.46824  |
| H | -4.01377 | -1.47353 | 1.18665  |
| H | -2.24921 | -2.18373 | 5.10229  |
| H | -2.72897 | -3.56838 | 4.05976  |
| H | -3.96093 | -2.50829 | 4.76374  |
| H | -2.52015 | -2.48389 | -4.94013 |
| H | -3.51654 | -3.13770 | 1.65706  |
| H | -3.57272 | 2.75817  | -0.92455 |
| C | 2.90010  | -0.20494 | -1.24379 |
| C | 4.27117  | -0.23822 | -1.24670 |
| C | 5.01930  | -0.07076 | -0.01711 |
| C | 4.22543  | 0.23094  | 1.15169  |
| C | 2.85583  | 0.24296  | 1.08589  |
| H | -3.47525 | 0.48970  | 2.68527  |
| N | 2.16256  | -0.05676 | -0.08269 |
| C | 0.71205  | 5.10288  | -0.36162 |
| N | 1.20208  | 6.14651  | -0.51690 |
| C | 2.42065  | 2.72376  | -0.56753 |
| N | 3.54554  | 2.87200  | -0.82719 |
| C | 1.47078  | -2.67810 | -1.70428 |
| N | 2.41029  | -3.34586 | -1.54620 |
| C | -0.85582 | -3.46738 | -3.48031 |
| N | -0.87502 | -4.45529 | -4.09473 |
| C | 1.87449  | -2.32153 | 1.87300  |
| N | 2.91308  | -2.84393 | 1.82569  |
| C | -0.24101 | -3.25712 | 3.74621  |
| N | 0.01103  | -4.12195 | 4.48225  |
| C | 4.85104  | 0.52929  | 2.40395  |
| N | 5.36309  | 0.76598  | 3.42124  |
| C | 6.42249  | -0.14086 | 0.02468  |
| N | 7.59145  | -0.20069 | 0.05884  |
| C | 4.94596  | -0.41114 | -2.49571 |
| N | 5.49847  | -0.55659 | -3.50932 |
| H | 2.25586  | 0.49863  | 1.96056  |
| H | 2.34578  | -0.25274 | -2.18051 |

[L4Co<sup>II</sup>OH] (S=1/2)

84

h\_u1\_opt.out Energy: -2326831.4690037

|   |          |          |          |
|---|----------|----------|----------|
| C | -1.29735 | -0.82362 | -1.30230 |
| N | -1.83837 | -1.86362 | -1.98313 |
| C | -0.80257 | -2.70353 | -2.38050 |
| C | 0.37108  | -2.18257 | -1.86193 |
| N | 0.04695  | -0.99267 | -1.22450 |
| B | 0.73967  | -0.10232 | -0.12370 |
| N | 0.38270  | 1.39824  | -0.44282 |
| C | -0.89513 | 1.82980  | -0.39720 |
| N | -0.91792 | 3.18057  | -0.54486 |
| C | 0.39275  | 3.59613  | -0.78258 |
| C | 1.20744  | 2.48293  | -0.70209 |
| N | -0.07048 | -0.51685 | 1.17126  |
| C | -1.40268 | -0.21252 | 1.26502  |
| N | -1.86688 | -0.77728 | 2.41264  |
| C | -0.84539 | -1.52667 | 2.99433  |

|    |          |          |          |
|----|----------|----------|----------|
| C  | 0.27237  | -1.38415 | 2.19298  |
| Co | -2.22701 | 0.52646  | -0.38072 |
| O  | -3.02959 | 1.21312  | -1.84430 |
| C  | -3.33194 | -2.15173 | -2.10787 |
| C  | -3.57601 | -3.66782 | -2.13413 |
| C  | -3.99116 | -1.59543 | -0.84092 |
| C  | -3.85878 | -1.48617 | -3.38293 |
| C  | -2.08088 | 4.17152  | -0.39632 |
| C  | -1.62062 | 5.30821  | 0.53580  |
| C  | -2.44432 | 4.67500  | -1.79832 |
| C  | -3.28257 | 3.49682  | 0.26547  |
| C  | -3.23223 | -0.60188 | 3.06327  |
| C  | -4.07810 | 0.37161  | 2.24659  |
| C  | -3.92632 | -1.97063 | 3.13548  |
| C  | -3.00707 | 0.00586  | 4.45988  |
| H  | -4.65654 | -3.83421 | -2.00661 |
| H  | -3.29561 | -4.12464 | -3.09182 |
| H  | -3.53030 | -2.01630 | 0.06392  |
| H  | -5.06015 | -1.85748 | -0.82864 |
| H  | -3.99482 | -0.49060 | -0.82963 |
| H  | -3.32450 | -1.86585 | -4.26884 |
| H  | -3.74725 | -0.39498 | -3.32087 |
| H  | -4.92763 | -1.72788 | -3.49681 |
| H  | -0.84614 | 5.95155  | 0.10016  |
| H  | -1.25786 | 4.90525  | 1.49542  |
| H  | -2.48934 | 5.95190  | 0.74133  |
| H  | -1.59381 | 5.16894  | -2.29413 |
| H  | -3.25999 | 5.41047  | -1.71519 |
| H  | -3.00493 | 3.06202  | 1.23949  |
| H  | -4.04381 | 4.26772  | 0.45719  |
| H  | -3.73509 | 2.73733  | -0.38278 |
| H  | -5.04054 | 0.51070  | 2.76121  |
| H  | -3.59842 | 1.35713  | 2.17296  |
| H  | -4.91997 | -1.83885 | 3.59112  |
| H  | -4.06491 | -2.39988 | 2.13104  |
| H  | -2.46300 | 0.96107  | 4.38369  |
| H  | -2.45651 | -0.66439 | 5.13504  |
| H  | -3.98775 | 0.20056  | 4.92094  |
| H  | -3.05486 | -4.18443 | -1.31189 |
| H  | -3.37353 | -2.69370 | 3.75233  |
| H  | -2.79202 | 3.83814  | -2.42314 |
| C  | 3.07321  | -0.49175 | -1.04871 |
| C  | 4.43675  | -0.57011 | -0.92518 |
| C  | 5.07880  | -0.31158 | 0.34410  |
| C  | 4.20303  | 0.13949  | 1.39939  |
| C  | 2.84475  | 0.18590  | 1.21399  |
| H  | -4.31306 | -0.00978 | 1.24395  |
| H  | -2.45505 | 1.46679  | -2.58661 |
| N  | 2.24166  | -0.22608 | 0.02785  |
| C  | -0.87399 | -3.85254 | -3.21078 |
| N  | -0.83723 | -4.78252 | -3.90777 |
| C  | 1.63036  | -2.83385 | -1.92808 |
| N  | 2.62075  | -3.43967 | -1.99653 |
| C  | 1.49690  | -2.08824 | 2.34104  |
| N  | 2.46921  | -2.71122 | 2.47794  |
| C  | -0.92069 | -2.32807 | 4.16269  |
| N  | -0.92771 | -3.00568 | 5.10812  |
| C  | 2.61387  | 2.49503  | -0.88606 |
| N  | 3.76152  | 2.57999  | -1.05358 |



|   |         |          |          |
|---|---------|----------|----------|
| C | 0.83730 | 4.89517  | -1.14308 |
| N | 1.27215 | 5.91929  | -1.48185 |
| C | 5.20894 | -0.87317 | -2.09107 |
| N | 5.83751 | -1.12397 | -3.03687 |
| C | 6.47044 | -0.42550 | 0.52021  |
| N | 7.62711 | -0.52172 | 0.66727  |
| C | 4.73233 | 0.56178  | 2.66105  |
| N | 5.16250 | 0.89965  | 3.68720  |
| H | 2.18958 | 0.56893  | 1.99697  |
| H | 2.60610 | -0.58078 | -2.02759 |

**[L<sub>4</sub>Co<sup>II</sup>OH] (S = 3/2)**

84

h\_u3\_opt.out Energy: -2326821.1939691

|    |          |          |          |
|----|----------|----------|----------|
| C  | -1.31261 | -0.71624 | -1.44220 |
| N  | -1.65049 | -1.70656 | -2.30695 |
| C  | -0.53896 | -2.49956 | -2.56206 |
| C  | 0.51397  | -1.96188 | -1.83984 |
| N  | 0.02981  | -0.82555 | -1.19367 |
| B  | 0.61841  | 0.03517  | -0.01277 |
| N  | 0.31498  | 1.56953  | -0.15296 |
| C  | -0.96805 | 2.02260  | -0.29376 |
| N  | -0.93731 | 3.37660  | -0.32603 |
| C  | 0.37450  | 3.81056  | -0.19090 |
| C  | 1.16533  | 2.67995  | -0.07666 |
| N  | -0.07363 | -0.57586 | 1.24962  |
| C  | -1.38404 | -0.25145 | 1.50689  |
| N  | -1.80733 | -1.07787 | 2.49576  |
| C  | -0.82731 | -2.02489 | 2.77074  |
| C  | 0.25753  | -1.72458 | 1.96796  |
| Co | -2.34122 | 0.56380  | -0.18445 |
| O  | -4.17686 | 0.78052  | -0.22451 |
| C  | -3.07747 | -1.88776 | -2.81499 |
| C  | -3.13513 | -2.95214 | -3.91363 |
| C  | -3.94619 | -2.31480 | -1.62096 |
| C  | -3.53500 | -0.53985 | -3.39081 |
| C  | -2.21073 | 4.20351  | -0.46030 |
| C  | -1.88949 | 5.69754  | -0.53658 |
| C  | -2.90643 | 3.76602  | -1.75762 |
| C  | -3.08095 | 3.92106  | 0.77517  |
| C  | -3.16428 | -1.00646 | 3.17550  |
| C  | -3.80512 | 0.35515  | 2.88638  |
| C  | -4.02158 | -2.14570 | 2.60633  |
| C  | -2.96071 | -1.13636 | 4.69481  |
| H  | -4.16611 | -2.97501 | -4.29861 |
| H  | -2.47248 | -2.71556 | -4.76108 |
| H  | -3.53624 | -3.21719 | -1.13862 |
| H  | -4.95970 | -2.54821 | -1.98505 |
| H  | -4.03650 | -1.50241 | -0.88409 |
| H  | -2.86190 | -0.20408 | -4.19611 |
| H  | -3.58152 | 0.22795  | -2.60781 |
| H  | -4.54875 | -0.65498 | -3.80541 |
| H  | -1.24966 | 5.94568  | -1.39738 |
| H  | -1.42866 | 6.07550  | 0.38839  |
| H  | -2.84089 | 6.23499  | -0.66991 |

|   |          |          |          |
|---|----------|----------|----------|
| H | -2.25558 | 3.93445  | -2.63080 |
| H | -3.82856 | 4.35375  | -1.88811 |
| H | -2.52765 | 4.14524  | 1.70179  |
| H | -3.97173 | 4.56850  | 0.73867  |
| H | -3.42690 | 2.87684  | 0.79790  |
| H | -4.71339 | 0.43500  | 3.50443  |
| H | -3.12910 | 1.18059  | 3.16289  |
| H | -5.02631 | -2.10737 | 3.05616  |
| H | -4.12286 | -2.03776 | 1.51438  |
| H | -2.26632 | -0.36350 | 5.06348  |
| H | -2.59464 | -2.12415 | 5.00532  |
| H | -3.93375 | -0.98546 | 5.18706  |
| H | -2.90894 | -3.96034 | -3.53706 |
| H | -3.58769 | -3.13471 | 2.82742  |
| H | -3.18431 | 2.70388  | -1.72194 |
| C | 2.91256  | -0.03513 | -1.10103 |
| C | 4.30643  | -0.08943 | -1.11198 |
| C | 5.00089  | -0.16006 | 0.11725  |
| C | 4.24708  | -0.14189 | 1.31390  |
| C | 2.85511  | -0.08755 | 1.23894  |
| H | -4.10297 | 0.47315  | 1.83601  |
| H | -4.61145 | 1.32622  | -0.89709 |
| N | 2.20724  | -0.07693 | 0.05236  |
| C | -0.41211 | -3.66159 | -3.36987 |
| N | -0.20325 | -4.61826 | -3.99725 |
| C | 1.81206  | -2.52492 | -1.75578 |
| N | 2.87280  | -3.00067 | -1.69092 |
| C | 1.44419  | -2.48969 | 1.84363  |
| N | 2.41622  | -3.11908 | 1.72134  |
| C | -0.91364 | -3.14797 | 3.63497  |
| N | -0.93527 | -4.10164 | 4.30082  |
| C | 2.57168  | 2.72589  | 0.08592  |
| N | 3.72530  | 2.80455  | 0.22236  |
| C | 0.89819  | 5.13138  | -0.16382 |
| N | 1.42081  | 6.16968  | -0.12869 |
| C | 4.99840  | -0.06987 | -2.36467 |
| N | 5.55400  | -0.05902 | -3.38428 |
| C | 6.42801  | -0.21817 | 0.15011  |
| N | 7.58859  | -0.26359 | 0.17675  |
| C | 4.87882  | -0.16393 | 2.59802  |
| N | 5.38507  | -0.18431 | 3.64290  |
| H | 2.25413  | -0.01080 | 2.14555  |
| H | 2.35341  | 0.06914  | -2.03257 |

[L<sub>4</sub>Co<sup>II</sup>OH] (S = 5/2)

84

h\_u5\_opt.out Energy: -2326798.7602106

|   |          |          |          |
|---|----------|----------|----------|
| C | -1.26103 | -0.64907 | -1.53887 |
| N | -1.52695 | -1.51027 | -2.55085 |
| C | -0.38379 | -2.25749 | -2.81264 |
| C | 0.60347  | -1.80556 | -1.95172 |
| N | 0.05414  | -0.76699 | -1.21232 |
| B | 0.65638  | -0.00428 | 0.03424  |
| N | 0.18864  | 1.52509  | 0.01441  |

|    |          |          |          |
|----|----------|----------|----------|
| C  | -1.10917 | 1.90175  | -0.08479 |
| N  | -1.19118 | 3.25137  | -0.08234 |
| C  | 0.09263  | 3.76179  | 0.03505  |
| C  | 0.95920  | 2.67636  | 0.10307  |
| N  | -0.03735 | -0.73507 | 1.24667  |
| C  | -1.34772 | -0.49607 | 1.53728  |
| N  | -1.71479 | -1.32636 | 2.53890  |
| C  | -0.66521 | -2.19873 | 2.80576  |
| C  | 0.38311  | -1.83893 | 1.97506  |
| Co | -2.40317 | 0.35897  | -0.07969 |
| O  | -4.15217 | 0.12631  | -0.28219 |
| C  | -2.88926 | -1.62782 | -3.23484 |
| C  | -2.76181 | -2.36535 | -4.57268 |
| C  | -3.81289 | -2.40817 | -2.28900 |
| C  | -3.39157 | -0.20374 | -3.51514 |
| C  | -2.51836 | 3.99959  | -0.20852 |
| C  | -2.29513 | 5.51342  | -0.19878 |
| C  | -3.15397 | 3.58870  | -1.54486 |
| C  | -3.39225 | 3.60437  | 0.99031  |
| C  | -3.03021 | -1.30035 | 3.30966  |
| C  | -3.81106 | -0.03324 | 2.95020  |
| C  | -3.82565 | -2.55422 | 2.92220  |
| C  | -2.69604 | -1.25596 | 4.81112  |
| H  | -3.73478 | -2.29215 | -5.08222 |
| H  | -2.00696 | -1.90713 | -5.23158 |
| H  | -3.40670 | -3.41350 | -2.09096 |
| H  | -4.79870 | -2.52402 | -2.76733 |
| H  | -3.95602 | -1.87703 | -1.33809 |
| H  | -2.68056 | 0.34312  | -4.15502 |
| H  | -3.55676 | 0.36719  | -2.59509 |
| H  | -4.35711 | -0.26732 | -4.04002 |
| H  | -1.67544 | 5.84980  | -1.04333 |
| H  | -1.86006 | 5.86753  | 0.74763  |
| H  | -3.28034 | 5.99239  | -0.30502 |
| H  | -2.48225 | 3.81203  | -2.38875 |
| H  | -4.09100 | 4.14972  | -1.68380 |
| H  | -2.87613 | 3.80769  | 1.94189  |
| H  | -4.32320 | 4.19153  | 0.96356  |
| H  | -3.67915 | 2.54298  | 0.96447  |
| H  | -4.67212 | 0.03814  | 3.63194  |
| H  | -3.19769 | 0.87356  | 3.07878  |
| H  | -4.79046 | -2.54655 | 3.45335  |
| H  | -4.02442 | -2.56471 | 1.83790  |
| H  | -2.06678 | -0.38182 | 5.04490  |
| H  | -2.19518 | -2.16406 | 5.17290  |
| H  | -3.63871 | -1.16217 | 5.37180  |
| H  | -2.54583 | -3.43520 | -4.44941 |
| H  | -3.29788 | -3.48105 | 3.19713  |
| H  | -3.40672 | 2.51860  | -1.57468 |
| C  | 2.88272  | 0.18657  | -1.12275 |
| C  | 4.25258  | 0.20900  | -1.16432 |
| C  | 5.03301  | 0.04482  | 0.03965  |
| C  | 4.27018  | -0.02331 | 1.26774  |
| C  | 2.89978  | -0.03692 | 1.24482  |
| H  | -4.20427 | -0.06458 | 1.92674  |
| H  | -4.84654 | 0.77022  | -0.51181 |
| N  | 2.17520  | -0.03021 | 0.05931  |
| C  | -0.19004 | -3.32527 | -3.72948 |
| N  | 0.07223  | -4.21413 | -4.43170 |

|   |          |          |          |
|---|----------|----------|----------|
| C | 1.88945  | -2.38952 | -1.80653 |
| N | 2.91366  | -2.93193 | -1.70955 |
| C | 1.60560  | -2.54610 | 1.83066  |
| N | 2.57773  | -3.17446 | 1.71885  |
| C | -0.66977 | -3.30474 | 3.69533  |
| N | -0.62838 | -4.23798 | 4.38807  |
| C | 2.36296  | 2.80987  | 0.26097  |
| N | 3.49738  | 3.02116  | 0.40552  |
| C | 0.52512  | 5.11379  | 0.09226  |
| N | 0.97963  | 6.18230  | 0.14892  |
| C | 4.89182  | 0.41728  | -2.42838 |
| N | 5.41239  | 0.58205  | -3.45515 |
| C | 6.43918  | 0.01678  | 0.02586  |
| N | 7.60915  | -0.00755 | 0.01420  |
| C | 4.92986  | -0.04825 | 2.53739  |
| N | 5.46834  | -0.07239 | 3.56804  |
| H | 2.33252  | -0.01588 | 2.17511  |
| H | 2.29654  | 0.35734  | -2.02658 |

#### Transition states for HAA by the $L_1Co^{III}O$ oxidant

##### $L_1Co^{III}O + CHD$ ( $S=0$ , closed-shell singlet)

88

chd\_ts\_u0\_closed\_freq.out Energy: -1941557.0065351

|    |          |          |          |
|----|----------|----------|----------|
| C  | 0.57543  | 1.47788  | -0.44505 |
| N  | 0.30086  | 2.72060  | -0.96049 |
| C  | 1.49629  | 3.34809  | -1.29848 |
| C  | 2.50731  | 2.49519  | -0.97116 |
| N  | 1.93433  | 1.36799  | -0.42266 |
| B  | 2.61884  | 0.02703  | 0.04762  |
| N  | 1.94692  | -0.32930 | 1.41057  |
| C  | 0.60263  | -0.42854 | 1.47570  |
| N  | 0.29103  | -0.71993 | 2.77602  |
| C  | 1.47111  | -0.79454 | 3.51696  |
| C  | 2.50176  | -0.54886 | 2.65651  |
| N  | 2.06391  | -1.02289 | -0.97933 |
| C  | 0.71883  | -1.20291 | -1.03729 |
| N  | 0.48746  | -2.06957 | -2.07233 |
| C  | 1.69819  | -2.38269 | -2.68528 |
| C  | 2.67520  | -1.71623 | -2.00526 |
| Co | -0.48862 | -0.08547 | -0.03435 |
| O  | -2.16112 | 0.27207  | -0.31223 |
| C  | -1.04946 | 3.36203  | -1.15965 |
| C  | -0.86777 | 4.83602  | -1.55689 |
| C  | -1.78248 | 2.62238  | -2.28934 |
| C  | -1.82928 | 3.30335  | 0.16304  |
| C  | -1.09518 | -0.87485 | 3.32786  |
| C  | -1.02251 | -1.32299 | 4.79347  |
| C  | -1.81006 | 0.48349  | 3.23438  |
| C  | -1.83648 | -1.94141 | 2.50785  |
| C  | -0.85332 | -2.55022 | -2.54605 |
| C  | -1.67119 | -3.02451 | -1.33583 |
| C  | -1.55409 | -1.38783 | -3.26816 |

|   |          |          |          |
|---|----------|----------|----------|
| C | -0.66607 | -3.72779 | -3.51389 |
| H | -1.86728 | 5.28855  | -1.65031 |
| H | -0.31200 | 5.40580  | -0.79371 |
| H | -1.19288 | 2.66182  | -3.22128 |
| H | -2.75873 | 3.10138  | -2.47353 |
| H | -1.96003 | 1.57962  | -1.99580 |
| H | -1.26375 | 3.80639  | 0.96596  |
| H | -2.03490 | 2.26176  | 0.43986  |
| H | -2.79481 | 3.82114  | 0.03929  |
| H | -0.52957 | -0.57279 | 5.43300  |
| H | -0.49893 | -2.28734 | 4.90187  |
| H | -2.04961 | -1.45302 | 5.16872  |
| H | -1.27101 | 1.24624  | 3.82122  |
| H | -2.83705 | 0.39441  | 3.62440  |
| H | -1.27112 | -2.88782 | 2.49325  |
| H | -2.82885 | -2.12659 | 2.94808  |
| H | -1.99511 | -1.59958 | 1.47555  |
| H | -2.63012 | -3.44492 | -1.67910 |
| H | -1.12550 | -3.80011 | -0.77362 |
| H | -2.53109 | -1.72013 | -3.65603 |
| H | -1.72446 | -0.55483 | -2.57182 |
| H | -0.10680 | -4.55502 | -3.04606 |
| H | -0.15420 | -3.42886 | -4.44284 |
| H | -1.66028 | -4.10730 | -3.79691 |
| H | -0.36498 | 4.95174  | -2.53095 |
| H | -0.94266 | -1.03625 | -4.11623 |
| H | -1.87744 | 0.81295  | 2.18728  |
| C | 4.21571  | 0.07194  | 0.25592  |
| C | 4.85315  | 1.21794  | 0.77886  |
| C | 6.21564  | 1.22795  | 1.10240  |
| C | 6.98749  | 0.07344  | 0.92705  |
| C | 6.37466  | -1.09050 | 0.44955  |
| C | 5.01062  | -1.08689 | 0.13028  |
| H | 4.27140  | 2.12575  | 0.96662  |
| H | 6.67352  | 2.13943  | 1.50182  |
| H | 8.05397  | 0.07641  | 1.17626  |
| H | 6.95808  | -2.01034 | 0.33328  |
| H | 4.55644  | -2.02626 | -0.19848 |
| H | 1.54794  | 4.33849  | -1.73652 |
| H | 3.58028  | 2.61063  | -1.09730 |
| H | 1.49264  | -1.01674 | 4.57871  |
| H | 3.57453  | -0.51531 | 2.83193  |
| H | 1.78014  | -3.04959 | -3.53710 |
| H | 3.74631  | -1.68542 | -2.18554 |
| H | -1.90181 | -2.18684 | -0.66517 |
| H | -3.17630 | -0.13067 | -0.59921 |
| C | -4.50537 | -0.71449 | -0.92868 |
| C | -4.88190 | -1.56701 | 0.27548  |
| C | -5.15406 | 0.55579  | -1.06487 |
| H | -4.28486 | -1.26568 | -1.85309 |
| C | -5.18896 | -0.69792 | 1.47738  |
| H | -4.07431 | -2.28523 | 0.51159  |
| H | -5.77127 | -2.21528 | 0.05826  |
| C | -5.67747 | 1.22093  | 0.02350  |
| H | -5.11483 | 1.06374  | -2.03825 |
| C | -5.60032 | 0.58805  | 1.32792  |
| H | -5.14585 | -1.15020 | 2.47593  |
| H | -6.07745 | 2.23584  | -0.06917 |
| H | -5.86824 | 1.17667  | 2.21515  |

**L<sub>1</sub>Co<sup>III</sup>O + CHD (S=0, open-shell singlet)**

88

| chd_ts_u0_open.out |          | Energy: -1942836.9525274 |          |
|--------------------|----------|--------------------------|----------|
| C                  | 0.54650  | 1.49905                  | -0.42691 |
| N                  | 0.29745  | 2.75548                  | -0.92030 |
| C                  | 1.50073  | 3.36138                  | -1.27041 |
| C                  | 2.49591  | 2.48039                  | -0.96954 |
| N                  | 1.90397  | 1.35967                  | -0.42550 |
| B                  | 2.56852  | 0.00103                  | 0.02189  |
| N                  | 1.90455  | -0.36820                 | 1.38539  |
| C                  | 0.55966  | -0.46504                 | 1.45877  |
| N                  | 0.25931  | -0.77057                 | 2.75890  |
| C                  | 1.44463  | -0.85552                 | 3.49135  |
| C                  | 2.46856  | -0.60250                 | 2.62541  |
| N                  | 2.00081  | -1.03035                 | -1.01704 |
| C                  | 0.65452  | -1.21439                 | -1.06882 |
| N                  | 0.42296  | -2.05959                 | -2.12204 |
| C                  | 1.63007  | -2.35100                 | -2.75323 |
| C                  | 2.60807  | -1.69533                 | -2.06467 |
| Co                 | -0.53895 | -0.08951                 | -0.04281 |
| O                  | -2.19645 | 0.30469                  | -0.37699 |
| C                  | -1.04243 | 3.42128                  | -1.08951 |
| C                  | -0.84261 | 4.90669                  | -1.43120 |
| C                  | -1.79060 | 2.73013                  | -2.24006 |
| C                  | -1.81887 | 3.32007                  | 0.23271  |
| C                  | -1.12293 | -0.94847                 | 3.30923  |
| C                  | -1.04624 | -1.38527                 | 4.77793  |
| C                  | -1.86889 | 0.39244                  | 3.20569  |
| C                  | -1.83781 | -2.03544                 | 2.49235  |
| C                  | -0.91846 | -2.53238                 | -2.59691 |
| C                  | -1.73252 | -3.01758                 | -1.38860 |
| C                  | -1.62033 | -1.36055                 | -3.30329 |
| C                  | -0.73720 | -3.70035                 | -3.57757 |
| H                  | -1.83518 | 5.37935                  | -1.49586 |
| H                  | -0.26799 | 5.43647                  | -0.65313 |
| H                  | -1.20320 | 2.79079                  | -3.17245 |
| H                  | -2.76006 | 3.22984                  | -2.40626 |
| H                  | -1.98145 | 1.68091                  | -1.97467 |
| H                  | -1.24428 | 3.78218                  | 1.05370  |
| H                  | -2.03528 | 2.26992                  | 0.46706  |
| H                  | -2.77804 | 3.85523                  | 0.13418  |
| H                  | -0.56610 | -0.62195                 | 5.41179  |
| H                  | -0.50686 | -2.33980                 | 4.89475  |
| H                  | -2.07159 | -1.52998                 | 5.15279  |
| H                  | -1.33992 | 1.17494                  | 3.77536  |
| H                  | -2.88876 | 0.28675                  | 3.61011  |
| H                  | -1.26481 | -2.97727                 | 2.50688  |
| H                  | -2.83936 | -2.22177                 | 2.91119  |
| H                  | -1.96813 | -1.71418                 | 1.44920  |
| H                  | -2.69928 | -3.42112                 | -1.73031 |
| H                  | -1.19133 | -3.80813                 | -0.84302 |
| H                  | -2.59975 | -1.68632                 | -3.69123 |
| H                  | -1.78311 | -0.53478                 | -2.59592 |
| H                  | -0.17292 | -4.53092                 | -3.12171 |
| H                  | -0.23188 | -3.39186                 | -4.50702 |
| H                  | -1.73271 | -4.07886                 | -3.85773 |

|   |          |          |          |
|---|----------|----------|----------|
| H | -0.34812 | 5.05245  | -2.40553 |
| H | -1.01170 | -1.00229 | -4.15071 |
| H | -1.95626 | 0.70710  | 2.15518  |
| C | 4.16870  | 0.02040  | 0.22201  |
| C | 4.82745  | 1.15041  | 0.75317  |
| C | 6.19122  | 1.13488  | 1.07144  |
| C | 6.94335  | -0.03039 | 0.88205  |
| C | 6.30940  | -1.17926 | 0.39553  |
| C | 4.94435  | -1.14986 | 0.08186  |
| H | 4.26141  | 2.06589  | 0.95141  |
| H | 6.66567  | 2.03483  | 1.47775  |
| H | 8.01069  | -0.04744 | 1.12708  |
| H | 6.87714  | -2.10741 | 0.26782  |
| H | 4.47314  | -2.07795 | -0.25524 |
| H | 1.56830  | 4.35627  | -1.69655 |
| H | 3.56936  | 2.57267  | -1.11072 |
| H | 1.47392  | -1.08864 | 4.55067  |
| H | 3.54262  | -0.57266 | 2.79364  |
| H | 1.70875  | -2.99697 | -3.62146 |
| H | 3.67781  | -1.65435 | -2.25165 |
| H | -1.94297 | -2.18714 | -0.70254 |
| H | -3.26107 | -0.16318 | -0.65686 |
| C | -4.51191 | -0.69551 | -0.92683 |
| C | -4.86566 | -1.58226 | 0.26111  |
| C | -5.23602 | 0.55084  | -1.03836 |
| H | -4.33131 | -1.23541 | -1.86726 |
| C | -5.22061 | -0.76284 | 1.48065  |
| H | -4.03662 | -2.27635 | 0.48753  |
| H | -5.72969 | -2.25092 | 0.01889  |
| C | -5.77747 | 1.16162  | 0.06480  |
| H | -5.23761 | 1.07449  | -2.00327 |
| C | -5.67662 | 0.50881  | 1.36161  |
| H | -5.16927 | -1.24130 | 2.46622  |
| H | -6.23698 | 2.15302  | -0.00671 |
| H | -5.97573 | 1.06765  | 2.25710  |

### L<sub>1</sub>Co<sup>III</sup>O + CHD (S=1)

88

chd\_ts\_u2.out Energy: -1942837.3627931

|    |          |          |          |
|----|----------|----------|----------|
| C  | 0.74853  | -1.15955 | -1.29856 |
| N  | 0.63740  | -2.21174 | -2.15388 |
| C  | 1.84861  | -2.89598 | -2.21737 |
| C  | 2.71585  | -2.23342 | -1.39791 |
| N  | 2.04101  | -1.14879 | -0.86217 |
| B  | 2.52015  | -0.14063 | 0.26290  |
| N  | 2.02845  | 1.29847  | -0.15462 |
| C  | 0.72688  | 1.56388  | -0.42645 |
| N  | 0.64936  | 2.88058  | -0.74796 |
| C  | 1.91950  | 3.45429  | -0.67568 |
| C  | 2.77636  | 2.45839  | -0.30429 |
| N  | 1.69480  | -0.57773 | 1.54322  |
| C  | 0.33528  | -0.47107 | 1.56918  |
| N  | -0.07304 | -1.02884 | 2.73977  |
| C  | 1.02466  | -1.53402 | 3.43145  |
| C  | 2.12474  | -1.25985 | 2.67035  |
| Co | -0.49319 | 0.02382  | -0.23341 |

|   |          |          |          |
|---|----------|----------|----------|
| O | -2.19992 | -0.28762 | -0.44412 |
| C | -0.62757 | -2.61134 | -2.85120 |
| C | -0.30472 | -3.62745 | -3.95549 |
| C | -1.57302 | -3.23809 | -1.81270 |
| C | -1.26555 | -1.35907 | -3.47470 |
| C | -0.63487 | 3.55960  | -1.09949 |
| C | -0.36881 | 5.03015  | -1.44030 |
| C | -1.24796 | 2.84179  | -2.31411 |
| C | -1.57740 | 3.46229  | 0.11202  |
| C | -1.50505 | -1.11267 | 3.17322  |
| C | -2.14994 | 0.27062  | 2.99344  |
| C | -2.22173 | -2.15277 | 2.29604  |
| C | -1.57134 | -1.52574 | 4.64937  |
| H | -1.23216 | -3.86138 | -4.50150 |
| H | 0.42389  | -3.22421 | -4.67873 |
| H | -1.09672 | -4.10878 | -1.33014 |
| H | -2.49934 | -3.57791 | -2.30627 |
| H | -1.83961 | -2.48966 | -1.05081 |
| H | -0.55872 | -0.86013 | -4.15908 |
| H | -1.57902 | -0.65660 | -2.68849 |
| H | -2.15999 | -1.65279 | -4.04923 |
| H | 0.30797  | 5.13247  | -2.30472 |
| H | 0.05982  | 5.57767  | -0.58470 |
| H | -1.32372 | 5.51259  | -1.70181 |
| H | -0.54882 | 2.85239  | -3.16683 |
| H | -2.17963 | 3.34730  | -2.61765 |
| H | -1.12529 | 3.93842  | 0.99796  |
| H | -2.53193 | 3.96691  | -0.11038 |
| H | -1.79330 | 2.40909  | 0.34941  |
| H | -3.19149 | 0.24442  | 3.35187  |
| H | -1.59758 | 1.03746  | 3.56243  |
| H | -3.26857 | -2.26229 | 2.62662  |
| H | -2.22553 | -1.81681 | 1.24730  |
| H | -1.01794 | -0.82286 | 5.29460  |
| H | -1.18053 | -2.54351 | 4.81365  |
| H | -2.62521 | -1.52269 | 4.96938  |
| H | 0.08391  | -4.57557 | -3.54891 |
| H | -1.72613 | -3.13569 | 2.37418  |
| H | -1.49003 | 1.79654  | -2.06561 |
| C | 4.12118  | -0.05877 | 0.47199  |
| C | 5.01139  | -0.18230 | -0.61621 |
| C | 6.38793  | 0.03803  | -0.48057 |
| C | 6.92093  | 0.41046  | 0.75894  |
| C | 6.05833  | 0.58060  | 1.84793  |
| C | 4.68374  | 0.35678  | 1.69772  |
| H | 4.62384  | -0.43186 | -1.60878 |
| H | 7.04517  | -0.07267 | -1.35004 |
| H | 7.99679  | 0.58228  | 0.87121  |
| H | 6.45509  | 0.89866  | 2.81830  |
| H | 4.03396  | 0.53954  | 2.55902  |
| H | 2.00941  | -3.77698 | -2.83085 |
| H | 3.75247  | -2.45967 | -1.16235 |
| H | 2.11838  | 4.50009  | -0.88934 |
| H | 3.85048  | 2.48802  | -0.13860 |
| H | 0.95298  | -2.03234 | 4.39344  |
| H | 3.16803  | -1.50407 | 2.85290  |
| H | -2.17455 | 0.54889  | 1.93028  |
| H | -3.20767 | 0.50350  | -0.48860 |
| C | -4.30448 | 1.14885  | -0.67860 |



|   |          |          |          |
|---|----------|----------|----------|
| C | -5.19358 | 0.09996  | -1.34126 |
| C | -4.71447 | 1.58609  | 0.65139  |
| H | -3.98571 | 1.95598  | -1.35482 |
| C | -5.79550 | -0.85406 | -0.33930 |
| H | -4.61482 | -0.45454 | -2.10301 |
| H | -6.02521 | 0.58303  | -1.90823 |
| C | -5.47433 | 0.78373  | 1.45370  |
| H | -4.31428 | 2.52820  | 1.04419  |
| C | -5.93836 | -0.50768 | 0.96217  |
| H | -6.17637 | -1.81678 | -0.70101 |
| H | -5.71041 | 1.08070  | 2.48109  |
| H | -6.42029 | -1.19648 | 1.66609  |

**L<sub>1</sub>Co<sup>III</sup>O + CHD (S=2)**

88

chd\_ts\_u4.out Energy: -1942835.7093810

|    |          |          |          |
|----|----------|----------|----------|
| C  | 0.52421  | -0.84237 | -1.48884 |
| N  | 0.25968  | -1.67858 | -2.52748 |
| C  | 1.42895  | -2.30659 | -2.94178 |
| C  | 2.42909  | -1.82786 | -2.14315 |
| N  | 1.86836  | -0.90751 | -1.27328 |
| B  | 2.53722  | -0.16668 | -0.03828 |
| N  | 2.03940  | 1.33305  | -0.03295 |
| C  | 0.72777  | 1.70001  | -0.00922 |
| N  | 0.70696  | 3.05754  | -0.01124 |
| C  | 2.00941  | 3.55348  | -0.03667 |
| C  | 2.83766  | 2.47009  | -0.05013 |
| N  | 1.91471  | -0.89950 | 1.22654  |
| C  | 0.58006  | -0.82783 | 1.48916  |
| N  | 0.35036  | -1.64359 | 2.55133  |
| C  | 1.53250  | -2.26610 | 2.93622  |
| C  | 2.50444  | -1.80507 | 2.09284  |
| Co | -0.54335 | 0.08035  | 0.01891  |
| O  | -2.23993 | 0.57655  | 0.04189  |
| C  | -1.11838 | -1.93148 | -3.05341 |
| C  | -1.03471 | -2.71818 | -4.36748 |
| C  | -1.88526 | -2.74438 | -1.99782 |
| C  | -1.81193 | -0.58117 | -3.29936 |
| C  | -0.55336 | 3.86578  | 0.01095  |
| C  | -0.20955 | 5.36055  | 0.00358  |
| C  | -1.37929 | 3.51117  | -1.23750 |
| C  | -1.33286 | 3.51344  | 1.28952  |
| C  | -1.00640 | -1.84912 | 3.14847  |
| C  | -1.61589 | -0.47249 | 3.46517  |
| C  | -1.87507 | -2.59044 | 2.11988  |
| C  | -0.88688 | -2.67647 | 4.43372  |
| H  | -2.05258 | -2.85189 | -4.76625 |
| H  | -0.44059 | -2.17906 | -5.12407 |
| H  | -1.37733 | -3.70180 | -1.79382 |
| H  | -2.90943 | -2.95631 | -2.34646 |
| H  | -1.95248 | -2.17395 | -1.06027 |
| H  | -1.21802 | 0.03977  | -3.99078 |
| H  | -1.95663 | -0.03153 | -2.35642 |
| H  | -2.80337 | -0.75416 | -3.74950 |
| H  | 0.34554  | 5.65069  | -0.90411 |
| H  | 0.37874  | 5.65190  | 0.88972  |

|   |          |          |          |
|---|----------|----------|----------|
| H | -1.14722 | 5.93809  | 0.02051  |
| H | -0.79549 | 3.69938  | -2.15483 |
| H | -2.28914 | 4.13427  | -1.27019 |
| H | -0.71682 | 3.70538  | 2.18472  |
| H | -2.24265 | 4.13419  | 1.35317  |
| H | -1.63759 | 2.45563  | 1.26761  |
| H | -2.58894 | -0.60640 | 3.96638  |
| H | -0.95442 | 0.10141  | 4.13549  |
| H | -2.87991 | -2.77758 | 2.53279  |
| H | -1.98832 | -1.97654 | 1.21479  |
| H | -0.23816 | -2.18214 | 5.17589  |
| H | -0.49784 | -3.68923 | 4.23796  |
| H | -1.88815 | -2.78688 | 4.87887  |
| H | -0.60254 | -3.72201 | -4.22371 |
| H | -1.42067 | -3.55607 | 1.84229  |
| H | -1.68548 | 2.45405  | -1.20133 |
| C | 4.15564  | -0.13361 | -0.06873 |
| C | 4.86717  | -0.01027 | -1.28147 |
| C | 6.25542  | 0.17258  | -1.31608 |
| C | 6.98295  | 0.25680  | -0.12343 |
| C | 6.30099  | 0.18045  | 1.09635  |
| C | 4.91243  | -0.00240 | 1.11540  |
| H | 4.32640  | -0.02649 | -2.23258 |
| H | 6.76874  | 0.25992  | -2.27995 |
| H | 8.06886  | 0.39797  | -0.14440 |
| H | 6.85034  | 0.27405  | 2.03955  |
| H | 4.40799  | -0.01178 | 2.08632  |
| H | 1.47324  | -3.02409 | -3.75560 |
| H | 3.48511  | -2.08424 | -2.13575 |
| H | 2.25219  | 4.61158  | -0.04323 |
| H | 3.92338  | 2.42781  | -0.07044 |
| H | 1.60478  | -2.96924 | 3.76053  |
| H | 3.55867  | -2.06562 | 2.05150  |
| H | -1.78052 | 0.10359  | 2.54093  |
| H | -3.29483 | -0.20737 | -0.03802 |
| C | -4.35616 | -0.90622 | 0.00525  |
| C | -5.03697 | -0.46425 | 1.29917  |
| C | -5.05235 | -0.55323 | -1.23180 |
| H | -3.98856 | -1.94197 | 0.03742  |
| C | -5.76313 | 0.84891  | 1.14308  |
| H | -4.29221 | -0.40144 | 2.11263  |
| H | -5.77137 | -1.23167 | 1.64205  |
| C | -5.90036 | 0.51462  | -1.28139 |
| H | -4.80002 | -1.09628 | -2.15055 |
| C | -6.17908 | 1.28042  | -0.07099 |
| H | -6.00700 | 1.42021  | 2.04698  |
| H | -6.35575 | 0.82701  | -2.22739 |
| H | -6.74726 | 2.21407  | -0.15884 |

**L<sub>1</sub>Co<sup>III</sup>O + DHA (S=0, closed-shell singlet)**

100

dha\_ts\_u0\_closed\_freq.out Energy: -2134154.4444290

|   |          |         |          |
|---|----------|---------|----------|
| C | -1.55040 | 1.38383 | -0.80652 |
| N | -1.31438 | 2.59738 | -1.39198 |
| C | -2.50570 | 3.31569 | -1.44710 |
| C | -3.47562 | 2.52453 | -0.90239 |

|    |          |          |          |
|----|----------|----------|----------|
| N  | -2.87903 | 1.33307  | -0.54030 |
| B  | -3.39527 | 0.08934  | 0.26488  |
| N  | -2.83781 | -1.15579 | -0.49813 |
| C  | -1.51787 | -1.24767 | -0.76740 |
| N  | -1.33099 | -2.42302 | -1.44244 |
| C  | -2.56329 | -3.06118 | -1.58007 |
| C  | -3.49916 | -2.26431 | -0.98740 |
| N  | -2.55691 | 0.17546  | 1.59658  |
| C  | -1.19661 | 0.12867  | 1.55444  |
| N  | -0.76399 | 0.30129  | 2.84524  |
| C  | -1.86738 | 0.50100  | 3.66936  |
| C  | -2.97838 | 0.43197  | 2.88317  |
| Co | -0.30497 | 0.06326  | -0.15208 |
| O  | 1.41363  | -0.08297 | 0.03733  |
| C  | 0.02521  | 3.11952  | -1.82161 |
| C  | -0.16016 | 4.40327  | -2.64275 |
| C  | 0.84841  | 3.42307  | -0.55974 |
| C  | 0.71571  | 2.06155  | -2.69708 |
| C  | -0.01854 | -2.96727 | -1.93086 |
| C  | -0.26271 | -4.23269 | -2.76491 |
| C  | 0.65387  | -1.90734 | -2.81798 |
| C  | 0.85036  | -3.31532 | -0.71146 |
| C  | 0.65083  | 0.22309  | 3.36266  |
| C  | 1.22004  | -1.15394 | 2.98328  |
| C  | 1.47140  | 1.37853  | 2.76871  |
| C  | 0.64863  | 0.35320  | 4.89413  |
| H  | 0.82970  | 4.74179  | -2.98636 |
| H  | -0.78892 | 4.23216  | -3.53234 |
| H  | 0.33625  | 4.17580  | 0.06299  |
| H  | 1.84372  | 3.80469  | -0.83621 |
| H  | 0.99656  | 2.50922  | 0.03290  |
| H  | 0.06358  | 1.75831  | -3.53242 |
| H  | 0.98923  | 1.17321  | -2.11109 |
| H  | 1.64785  | 2.47786  | -3.10979 |
| H  | -0.90060 | -4.03261 | -3.64186 |
| H  | -0.71352 | -5.04291 | -2.16905 |
| H  | 0.70983  | -4.59646 | -3.13151 |
| H  | -0.01877 | -1.60010 | -3.63583 |
| H  | 1.57483  | -2.32359 | -3.25446 |
| H  | 0.34278  | -4.06539 | -0.08146 |
| H  | 1.81726  | -3.72420 | -1.04492 |
| H  | 1.05657  | -2.41480 | -0.11631 |
| H  | 2.22833  | -1.26797 | 3.41377  |
| H  | 0.57916  | -1.95587 | 3.38780  |
| H  | 2.48276  | 1.37816  | 3.20719  |
| H  | 1.57368  | 1.25690  | 1.68291  |
| H  | 0.07172  | -0.44981 | 5.38169  |
| H  | 0.26493  | 1.33043  | 5.23056  |
| H  | 1.69005  | 0.27170  | 5.24221  |
| H  | -0.59655 | 5.22077  | -2.04645 |
| H  | 0.99398  | 2.34595  | 2.99978  |
| H  | 0.93977  | -1.02352 | -2.23262 |
| C  | -4.98831 | -0.06966 | 0.42892  |
| C  | -5.88224 | 0.38381  | -0.56382 |
| C  | -7.25782 | 0.12742  | -0.49719 |
| C  | -7.78336 | -0.61389 | 0.56705  |
| C  | -6.91565 | -1.11270 | 1.54569  |
| C  | -5.54261 | -0.84889 | 1.46738  |
| H  | -5.50159 | 0.92854  | -1.43276 |

|   |          |          |          |
|---|----------|----------|----------|
| H | -7.91963 | 0.50103  | -1.28607 |
| H | -8.85828 | -0.81546 | 0.62471  |
| H | -7.30744 | -1.71836 | 2.37004  |
| H | -4.88816 | -1.28790 | 2.22685  |
| H | -2.58111 | 4.31326  | -1.86700 |
| H | -4.53053 | 2.73186  | -0.74492 |
| H | -2.68442 | -4.01512 | -2.08204 |
| H | -4.57289 | -2.39765 | -0.87883 |
| H | -1.79171 | 0.67280  | 4.73700  |
| H | -4.02483 | 0.55645  | 3.14756  |
| H | 1.29696  | -1.24909 | 1.89230  |
| H | 2.36714  | -0.08445 | -0.60040 |
| C | 3.64024  | -0.03612 | -1.32779 |
| C | 4.21814  | 1.15074  | -0.69148 |
| C | 4.19765  | -1.32968 | -0.92477 |
| H | 3.40666  | 0.06618  | -2.39705 |
| C | 4.71483  | 1.04104  | 0.63672  |
| C | 4.27737  | 2.41211  | -1.32349 |
| C | 4.69368  | -1.47756 | 0.40004  |
| C | 4.24390  | -2.44984 | -1.78348 |
| C | 5.24931  | 2.16322  | 1.27741  |
| C | 4.57161  | -0.29372 | 1.33702  |
| C | 4.80046  | 3.53048  | -0.66695 |
| H | 3.90785  | 2.50711  | -2.35055 |
| C | 5.21184  | -2.70737 | 0.81808  |
| C | 4.74961  | -3.67876 | -1.34872 |
| H | 3.87970  | -2.34387 | -2.81138 |
| C | 5.29189  | 3.41335  | 0.64030  |
| H | 5.63177  | 2.06073  | 2.30043  |
| H | 5.27793  | -0.37900 | 2.18088  |
| H | 3.55575  | -0.32349 | 1.77392  |
| H | 4.83090  | 4.49768  | -1.18140 |
| H | 5.59504  | -2.80416 | 1.84140  |
| C | 5.23859  | -3.81610 | -0.04241 |
| H | 4.76975  | -4.53211 | -2.03605 |
| H | 5.70685  | 4.28369  | 1.15935  |
| H | 5.64084  | -4.77392 | 0.30382  |

**L<sub>1</sub>Co<sup>III</sup>O + DHA (S=1)**

100

dha\_ts\_u2.out Energy: -2135632.8429139

|   |          |          |          |
|---|----------|----------|----------|
| C | -1.24889 | -1.48195 | -0.80057 |
| N | -0.94289 | -2.51741 | -1.62624 |
| C | -2.07632 | -2.89367 | -2.34194 |
| C | -3.09171 | -2.08023 | -1.92685 |
| N | -2.58121 | -1.23525 | -0.95510 |
| B | -3.27396 | 0.00041  | -0.24013 |
| N | -2.82485 | -0.02943 | 1.26915  |
| C | -1.51662 | -0.03354 | 1.60976  |
| N | -1.44790 | -0.06233 | 2.96418  |
| C | -2.74299 | -0.07655 | 3.48700  |
| C | -3.59751 | -0.05579 | 2.42151  |
| N | -2.58709 | 1.26771  | -0.90341 |
| C | -1.25603 | 1.51417  | -0.73807 |
| N | -0.95476 | 2.58467  | -1.51957 |
| C | -2.08983 | 2.98513  | -2.21939 |

|    |          |          |          |
|----|----------|----------|----------|
| C  | -3.10136 | 2.15008  | -1.83929 |
| Co | -0.25541 | -0.00032 | 0.13337  |
| O  | 1.45893  | 0.00792  | -0.07965 |
| C  | 0.43106  | -3.10091 | -1.78772 |
| C  | 0.33234  | -4.44409 | -2.52325 |
| C  | 1.28471  | -2.11178 | -2.59840 |
| C  | 1.04375  | -3.32140 | -0.39659 |
| C  | -0.15692 | -0.07735 | 3.72189  |
| C  | -0.44377 | -0.10715 | 5.22713  |
| C  | 0.63316  | -1.33234 | 3.31166  |
| C  | 0.63336  | 1.19281  | 3.36200  |
| C  | 0.41608  | 3.18219  | -1.65427 |
| C  | 1.02402  | 3.35027  | -0.25361 |
| C  | 1.27764  | 2.23178  | -2.50218 |
| C  | 0.31079  | 4.55332  | -2.33533 |
| H  | 1.33778  | -4.89097 | -2.57238 |
| H  | -0.32923 | -5.15006 | -1.99355 |
| H  | 0.83709  | -1.93254 | -3.59101 |
| H  | 2.29951  | -2.52099 | -2.73626 |
| H  | 1.37263  | -1.16192 | -2.05010 |
| H  | 0.40035  | -3.97505 | 0.21642  |
| H  | 1.19104  | -2.36119 | 0.11637  |
| H  | 2.03477  | -3.79198 | -0.49936 |
| H  | -1.00484 | -1.01039 | 5.51846  |
| H  | -1.00568 | 0.78352  | 5.55346  |
| H  | 0.51401  | -0.11741 | 5.77054  |
| H  | 0.04835  | -2.24560 | 3.51094  |
| H  | 1.57516  | -1.38646 | 3.88175  |
| H  | 0.04815  | 2.09749  | 3.59613  |
| H  | 1.57462  | 1.22466  | 3.93500  |
| H  | 0.88970  | 1.20322  | 2.29117  |
| H  | 2.01106  | 3.83342  | -0.33426 |
| H  | 0.37368  | 3.97271  | 0.38406  |
| H  | 2.28993  | 2.65287  | -2.62165 |
| H  | 1.37125  | 1.26121  | -1.99243 |
| H  | -0.35543 | 5.23381  | -1.77879 |
| H  | -0.04574 | 4.47700  | -3.37573 |
| H  | 1.31376  | 5.00741  | -2.36495 |
| H  | -0.02622 | -4.32819 | -3.55931 |
| H  | 0.83285  | 2.08972  | -3.50205 |
| H  | 0.88815  | -1.30108 | 2.24089  |
| C  | -4.88784 | -0.00331 | -0.26778 |
| C  | -5.62093 | -1.20688 | -0.19366 |
| C  | -7.01536 | -1.22081 | -0.06232 |
| C  | -7.72539 | -0.01720 | 0.01695  |
| C  | -7.02233 | 1.19270  | -0.01427 |
| C  | -5.62784 | 1.19208  | -0.14584 |
| H  | -5.09390 | -2.16581 | -0.21267 |
| H  | -7.54786 | -2.17687 | -0.01247 |
| H  | -8.81595 | -0.02236 | 0.11795  |
| H  | -7.56034 | 2.14292  | 0.07355  |
| H  | -5.10635 | 2.15402  | -0.12642 |
| H  | -2.08553 | -3.69886 | -3.07014 |
| H  | -4.12773 | -2.04610 | -2.25408 |
| H  | -2.95749 | -0.09955 | 4.55108  |
| H  | -4.68462 | -0.05773 | 2.39553  |
| H  | -2.10275 | 3.82000  | -2.91331 |
| H  | -4.13710 | 2.12466  | -2.16823 |
| H  | 1.17806  | 2.37113  | 0.22006  |

|   |         |          |          |
|---|---------|----------|----------|
| H | 2.41425 | -0.00891 | 0.67812  |
| C | 3.60603 | -0.02132 | 1.28033  |
| C | 4.14659 | -1.26632 | 0.71000  |
| C | 4.14829 | 1.24207  | 0.75366  |
| H | 3.41872 | -0.04004 | 2.36305  |
| C | 4.59067 | -1.25784 | -0.63646 |
| C | 4.16775 | -2.47861 | 1.42734  |
| C | 4.59249 | 1.27989  | -0.59230 |
| C | 4.16963 | 2.42896  | 1.51228  |
| C | 5.04985 | -2.44475 | -1.21891 |
| C | 4.47025 | 0.02531  | -1.43055 |
| C | 4.61987 | -3.65949 | 0.83207  |
| H | 3.81657 | -2.48714 | 2.46554  |
| C | 5.05270 | 2.48587  | -1.13335 |
| C | 4.62232 | 3.62948  | 0.95807  |
| H | 3.81781 | 2.40196  | 2.54995  |
| C | 5.06468 | -3.64691 | -0.49699 |
| H | 5.39237 | -2.43139 | -2.26049 |
| H | 5.18876 | 0.03932  | -2.26834 |
| H | 3.45918 | 0.03407  | -1.88499 |
| H | 4.62561 | -4.59285 | 1.40543  |
| H | 5.39539 | 2.50826  | -2.17471 |
| C | 5.06783 | 3.66244  | -0.37041 |
| H | 4.62811 | 4.54258  | 1.56317  |
| H | 5.42205 | -4.56742 | -0.97027 |
| H | 5.42584 | 4.59854  | -0.81156 |

#### L<sub>1</sub>Co<sup>III</sup>O + DHA (S=2)

100

dha\_ts\_u4.out Energy: -2135629.9062323

|    |          |          |          |
|----|----------|----------|----------|
| C  | 1.42388  | -0.31117 | -1.70386 |
| N  | 1.29818  | -0.71993 | -2.99285 |
| C  | 2.55169  | -1.01626 | -3.51650 |
| C  | 3.45709  | -0.76736 | -2.52277 |
| N  | 2.75599  | -0.30646 | -1.42079 |
| B  | 3.27682  | -0.03751 | 0.05847  |
| N  | 2.62088  | 1.30831  | 0.59226  |
| C  | 1.28019  | 1.51960  | 0.64173  |
| N  | 1.08842  | 2.75245  | 1.16874  |
| C  | 2.31830  | 3.33291  | 1.45989  |
| C  | 3.27360  | 2.42384  | 1.09600  |
| N  | 2.66743  | -1.24177 | 0.88496  |
| C  | 1.31908  | -1.39217 | 1.02316  |
| N  | 1.12583  | -2.58403 | 1.64789  |
| C  | 2.35127  | -3.20970 | 1.86234  |
| C  | 3.30914  | -2.37114 | 1.37044  |
| Co | 0.19469  | -0.01493 | -0.08527 |
| O  | -1.50889 | -0.39003 | -0.00113 |
| C  | -0.02095 | -0.85971 | -3.69114 |
| C  | 0.21306  | -1.19180 | -5.16989 |
| C  | -0.81631 | -1.98863 | -3.01404 |
| C  | -0.77963 | 0.47371  | -3.57368 |
| C  | -0.27561 | 3.33504  | 1.38126  |
| C  | -0.14863 | 4.74391  | 1.97025  |
| C  | -0.99859 | 3.39464  | 0.02614  |
| C  | -1.04762 | 2.42243  | 2.34963  |

|   |          |          |          |
|---|----------|----------|----------|
| C | -0.22140 | -3.14621 | 1.99561  |
| C | -1.02112 | -2.07399 | 2.75464  |
| C | -0.94072 | -3.53154 | 0.69225  |
| C | -0.04775 | -4.38386 | 2.88597  |
| H | -0.76255 | -1.25592 | -5.67673 |
| H | 0.80620  | -0.41139 | -5.67515 |
| H | -0.24888 | -2.93422 | -3.03744 |
| H | -1.77242 | -2.14144 | -3.54210 |
| H | -1.04042 | -1.72674 | -1.96912 |
| H | -0.18528 | 1.30145  | -3.99500 |
| H | -1.01370 | 0.70076  | -2.52312 |
| H | -1.73219 | 0.40904  | -4.12488 |
| H | 0.39712  | 5.42206  | 1.29323  |
| H | 0.35718  | 4.73492  | 2.95008  |
| H | -1.15863 | 5.15761  | 2.11742  |
| H | -0.41659 | 3.98144  | -0.70423 |
| H | -1.98942 | 3.85811  | 0.14777  |
| H | -0.52506 | 2.34501  | 3.31791  |
| H | -2.05699 | 2.83138  | 2.51976  |
| H | -1.15938 | 1.41474  | 1.91958  |
| H | -2.00169 | -2.48632 | 3.04653  |
| H | -0.48559 | -1.76173 | 3.66734  |
| H | -1.92181 | -3.97974 | 0.92407  |
| H | -1.11196 | -2.63352 | 0.08130  |
| H | 0.50480  | -4.14800 | 3.81095  |
| H | 0.46871  | -5.20443 | 2.36101  |
| H | -1.04516 | -4.75281 | 3.17246  |
| H | 0.71764  | -2.16354 | -5.29840 |
| H | -0.34634 | -4.26558 | 0.12158  |
| H | -1.16010 | 2.38204  | -0.37405 |
| C | 4.87879  | 0.14317  | 0.18673  |
| C | 5.62679  | 0.79490  | -0.81721 |
| C | 6.98510  | 1.09642  | -0.65635 |
| C | 7.64122  | 0.76760  | 0.53543  |
| C | 6.91650  | 0.15805  | 1.56603  |
| C | 5.55859  | -0.13763 | 1.39121  |
| H | 5.13620  | 1.10613  | -1.74459 |
| H | 7.52995  | 1.59971  | -1.46253 |
| H | 8.70362  | 0.99943  | 0.66611  |
| H | 7.40724  | -0.08016 | 2.51605  |
| H | 5.01334  | -0.57409 | 2.23352  |
| H | 2.71488  | -1.36828 | -4.53055 |
| H | 4.53648  | -0.89321 | -2.52923 |
| H | 2.42989  | 4.32343  | 1.89104  |
| H | 4.35656  | 2.49355  | 1.15877  |
| H | 2.45847  | -4.17732 | 2.34271  |
| H | 4.38687  | -2.50452 | 1.33057  |
| H | -1.19929 | -1.20012 | 2.11140  |
| H | -2.51768 | -0.11922 | -0.71171 |
| C | -3.71326 | 0.05396  | -1.20789 |
| C | -4.37408 | -1.05326 | -0.48630 |
| C | -4.08374 | 1.41677  | -0.77831 |
| H | -3.62733 | -0.08424 | -2.29532 |
| C | -4.67873 | -0.86879 | 0.88527  |
| C | -4.62128 | -2.30535 | -1.07978 |
| C | -4.40425 | 1.62633  | 0.58647  |
| C | -4.09993 | 2.51433  | -1.65989 |
| C | -5.23897 | -1.92243 | 1.61643  |
| C | -4.30042 | 0.44770  | 1.52917  |

|   |          |          |          |
|---|----------|----------|----------|
| C | -5.16891 | -3.35600 | -0.33647 |
| H | -4.37326 | -2.45155 | -2.13737 |
| C | -4.74662 | 2.90969  | 1.02694  |
| C | -4.43915 | 3.79349  | -1.20803 |
| H | -3.84638 | 2.35370  | -2.71402 |
| C | -5.48364 | -3.16610 | 1.01614  |
| H | -5.47634 | -1.77278 | 2.67635  |
| H | -4.87888 | 0.62257  | 2.45200  |
| H | -3.23561 | 0.36171  | 1.82814  |
| H | -5.35455 | -4.32428 | -0.81379 |
| H | -4.99713 | 3.06439  | 2.08303  |
| C | -4.76688 | 3.99548  | 0.13937  |
| H | -4.44845 | 4.63545  | -1.90855 |
| H | -5.91725 | -3.98272 | 1.60286  |
| H | -5.03513 | 4.99396  | 0.49992  |

**L<sub>1</sub>Co<sup>III</sup>O + Fluorene (S=0, closed-shell)**

97

fluorene\_ts\_u0\_closed.out Energy: -2110974.6416944

|    |          |          |          |
|----|----------|----------|----------|
| C  | -1.03275 | -0.70758 | -1.29869 |
| N  | -0.45861 | -1.31630 | -2.37900 |
| C  | -1.45126 | -1.61537 | -3.30797 |
| C  | -2.63780 | -1.19615 | -2.77837 |
| N  | -2.36635 | -0.66473 | -1.53339 |
| B  | -3.25977 | 0.04612  | -0.45474 |
| N  | -2.84982 | -0.61020 | 0.91416  |
| C  | -1.56338 | -0.65658 | 1.33563  |
| N  | -1.56422 | -1.31255 | 2.53966  |
| C  | -2.87536 | -1.66630 | 2.85146  |
| C  | -3.66977 | -1.22571 | 1.83561  |
| N  | -2.65635 | 1.49385  | -0.41655 |
| C  | -1.33682 | 1.62090  | -0.13451 |
| N  | -1.02722 | 2.94669  | -0.27527 |
| C  | -2.16922 | 3.63349  | -0.67828 |
| C  | -3.17794 | 2.72021  | -0.77432 |
| Co | -0.22018 | 0.10958  | 0.25018  |
| O  | 1.30904  | 0.10085  | 1.00316  |
| C  | 0.99430  | -1.68333 | -2.51673 |
| C  | 1.22113  | -2.40366 | -3.85253 |
| C  | 1.84736  | -0.40717 | -2.48065 |
| C  | 1.36334  | -2.62441 | -1.36113 |
| C  | -0.38584 | -1.62184 | 3.43018  |
| C  | -0.86199 | -2.40451 | 4.66409  |
| C  | 0.61199  | -2.49304 | 2.65099  |
| C  | 0.23892  | -0.29619 | 3.89273  |
| C  | 0.31431  | 3.59000  | -0.03943 |
| C  | 0.70015  | 3.38709  | 1.43425  |
| C  | 1.34349  | 2.95342  | -0.98369 |
| C  | 0.22553  | 5.09345  | -0.33746 |
| H  | 2.28654  | -2.67404 | -3.91772 |
| H  | 0.63652  | -3.33528 | -3.92640 |
| H  | 1.49970  | 0.32052  | -3.23250 |
| H  | 2.89873  | -0.66128 | -2.68441 |
| H  | 1.82363  | 0.05632  | -1.48578 |
| H  | 0.73760  | -3.53266 | -1.38535 |
| H  | 1.23454  | -2.12474 | -0.39097 |



|   |          |          |          |
|---|----------|----------|----------|
| H | 2.42130  | -2.91513 | -1.43997 |
| H | -1.31978 | -3.37054 | 4.39480  |
| H | -1.57094 | -1.82654 | 5.27912  |
| H | 0.01835  | -2.61831 | 5.28995  |
| H | 0.12557  | -3.42137 | 2.30668  |
| H | 1.45252  | -2.76546 | 3.31004  |
| H | -0.50057 | 0.30064  | 4.45343  |
| H | 1.09366  | -0.50511 | 4.55743  |
| H | 0.60428  | 0.27538  | 3.02980  |
| H | 1.67690  | 3.85923  | 1.62537  |
| H | -0.05233 | 3.84733  | 2.09684  |
| H | 2.30766  | 3.47730  | -0.89769 |
| H | 1.52850  | 1.90677  | -0.71391 |
| H | -0.49520 | 5.60739  | 0.31950  |
| H | -0.03780 | 5.29283  | -1.38932 |
| H | 1.21657  | 5.53652  | -0.15340 |
| H | 0.98532  | -1.76006 | -4.71630 |
| H | 0.99755  | 3.00671  | -2.02939 |
| H | 1.01808  | -1.94848 | 1.79055  |
| C | -4.85409 | -0.06568 | -0.63457 |
| C | -5.45790 | -1.20902 | -1.19942 |
| C | -6.84870 | -1.37007 | -1.24052 |
| C | -7.68576 | -0.38952 | -0.69614 |
| C | -7.11488 | 0.73647  | -0.09169 |
| C | -5.72285 | 0.88530  | -0.05734 |
| H | -4.83457 | -2.01666 | -1.59400 |
| H | -7.27884 | -2.27084 | -1.69154 |
| H | -8.77382 | -0.50997 | -0.72740 |
| H | -7.75516 | 1.49922  | 0.36444  |
| H | -5.31033 | 1.75576  | 0.46167  |
| H | -1.25150 | -2.09551 | -4.25998 |
| H | -3.63662 | -1.22962 | -3.20445 |
| H | -3.14805 | -2.19609 | 3.75698  |
| H | -4.74539 | -1.30313 | 1.69900  |
| H | -2.18728 | 4.70177  | -0.86382 |
| H | -4.21131 | 2.85788  | -1.07998 |
| H | 0.79054  | 2.31731  | 1.66881  |
| H | 2.46767  | -0.02037 | 1.36975  |
| C | 3.82962  | -0.12986 | 1.64001  |
| C | 4.33283  | 1.02406  | 0.89432  |
| H | 3.83750  | -0.14914 | 2.73928  |
| C | 4.23159  | -1.29998 | 0.85876  |
| C | 4.32573  | 2.39788  | 1.19447  |
| C | 4.82686  | 0.58657  | -0.37917 |
| C | 4.11469  | -2.67739 | 1.11994  |
| C | 4.77576  | -0.86878 | -0.39625 |
| C | 4.78499  | 3.31440  | 0.24298  |
| H | 3.95757  | 2.74798  | 2.16547  |
| C | 5.25922  | 1.51930  | -1.33524 |
| C | 4.53321  | -3.60073 | 0.15642  |
| H | 3.70079  | -3.02370 | 2.07346  |
| C | 5.16757  | -1.80616 | -1.36483 |
| C | 5.23894  | 2.88312  | -1.02137 |
| H | 4.78270  | 4.38491  | 0.47800  |
| H | 5.62004  | 1.18218  | -2.31403 |
| C | 5.05098  | -3.17233 | -1.08440 |
| H | 4.45011  | -4.67377 | 0.36311  |
| H | 5.57386  | -1.47193 | -2.32663 |
| H | 5.58128  | 3.61946  | -1.75645 |

|   |         |          |          |
|---|---------|----------|----------|
| H | 5.36279 | -3.91289 | -1.82870 |
|---|---------|----------|----------|

**L<sub>1</sub>Co<sup>III</sup>O + Fluorene (S=1)**

97

fluorene\_ts\_u2.out Energy: -2110968.8996314

|    |          |          |          |
|----|----------|----------|----------|
| C  | -0.89473 | -0.79022 | -1.19407 |
| N  | -0.30900 | -1.23924 | -2.33578 |
| C  | -1.25339 | -1.27685 | -3.35630 |
| C  | -2.43639 | -0.85903 | -2.81670 |
| N  | -2.21236 | -0.59235 | -1.47811 |
| B  | -3.18446 | 0.05480  | -0.41086 |
| N  | -2.89291 | -0.68452 | 0.93920  |
| C  | -1.63998 | -0.74224 | 1.43139  |
| N  | -1.68322 | -1.43981 | 2.59737  |
| C  | -3.00527 | -1.82353 | 2.83475  |
| C  | -3.75338 | -1.34911 | 1.79631  |
| N  | -2.64384 | 1.53068  | -0.23448 |
| C  | -1.40337 | 1.76855  | 0.27764  |
| N  | -1.17867 | 3.10415  | 0.14871  |
| C  | -2.26363 | 3.69954  | -0.48758 |
| C  | -3.16889 | 2.70835  | -0.73492 |
| Co | -0.25769 | 0.11717  | 0.46339  |
| O  | 1.41489  | 0.34466  | 0.73281  |
| C  | 1.14502  | -1.58665 | -2.47910 |
| C  | 1.35483  | -2.39189 | -3.76857 |
| C  | 1.95243  | -0.28048 | -2.53613 |
| C  | 1.56536  | -2.43798 | -1.27426 |
| C  | -0.49997 | -1.73251 | 3.47278  |
| C  | -0.94918 | -2.56781 | 4.67811  |
| C  | 0.53378  | -2.52207 | 2.65298  |
| C  | 0.09158  | -0.39788 | 3.95701  |
| C  | 0.09507  | 3.80784  | 0.51683  |
| C  | 0.55094  | 3.32685  | 1.90283  |
| C  | 1.14701  | 3.47203  | -0.55263 |
| C  | -0.15219 | 5.32254  | 0.55929  |
| H  | 2.41183  | -2.69722 | -3.81751 |
| H  | 0.73488  | -3.30396 | -3.78495 |
| H  | 1.62982  | 0.33957  | -3.38999 |
| H  | 3.02450  | -0.50704 | -2.64592 |
| H  | 1.82606  | 0.28502  | -1.60148 |
| H  | 0.92498  | -3.33173 | -1.18498 |
| H  | 1.50947  | -1.85640 | -0.34563 |
| H  | 2.61016  | -2.75878 | -1.39545 |
| H  | -1.37901 | -3.53505 | 4.36986  |
| H  | -1.68261 | -2.03052 | 5.30142  |
| H  | -0.06898 | -2.77766 | 5.30547  |
| H  | 0.08854  | -3.44464 | 2.24515  |
| H  | 1.38340  | -2.79934 | 3.29784  |
| H  | -0.66695 | 0.19021  | 4.50004  |
| H  | 0.93728  | -0.59220 | 4.63694  |
| H  | 0.46882  | 0.19514  | 3.11001  |
| H  | 1.44878  | 3.89184  | 2.20362  |
| H  | -0.23758 | 3.49725  | 2.65510  |
| H  | 2.08861  | 4.00246  | -0.34003 |
| H  | 1.35992  | 2.39287  | -0.54767 |
| H  | -0.96325 | 5.58243  | 1.26006  |

|   |          |          |          |
|---|----------|----------|----------|
| H | -0.39182 | 5.73590  | -0.43392 |
| H | 0.76865  | 5.81818  | 0.90435  |
| H | 1.14230  | -1.79834 | -4.67289 |
| H | 0.79232  | 3.77524  | -1.55251 |
| H | 0.92707  | -1.91701 | 1.82293  |
| C | -4.75799 | -0.07570 | -0.73029 |
| C | -5.28272 | -1.20569 | -1.39255 |
| C | -6.66104 | -1.40019 | -1.54777 |
| C | -7.56498 | -0.46821 | -1.02480 |
| C | -7.07475 | 0.64350  | -0.32976 |
| C | -5.69412 | 0.82646  | -0.18170 |
| H | -4.60451 | -1.97198 | -1.78073 |
| H | -7.02987 | -2.28828 | -2.07237 |
| H | -8.64363 | -0.61481 | -1.14522 |
| H | -7.77006 | 1.36852  | 0.10708  |
| H | -5.34458 | 1.68626  | 0.39850  |
| H | -1.02663 | -1.60083 | -4.36723 |
| H | -3.40854 | -0.73481 | -3.28705 |
| H | -3.30960 | -2.39430 | 3.70590  |
| H | -4.81983 | -1.43160 | 1.60069  |
| H | -2.32089 | 4.76137  | -0.70525 |
| H | -4.13712 | 2.76015  | -1.22642 |
| H | 0.81444  | 2.26037  | 1.87800  |
| H | 2.56792  | 0.13618  | 0.96942  |
| C | 3.91591  | 0.01827  | 1.28899  |
| C | 4.48891  | 1.01117  | 0.37508  |
| H | 3.87639  | 0.19658  | 2.37272  |
| C | 4.31925  | -1.28339 | 0.75062  |
| C | 4.47058  | 2.41498  | 0.40977  |
| C | 5.05686  | 0.34163  | -0.75514 |
| C | 4.12566  | -2.58659 | 1.23817  |
| C | 4.95644  | -1.09431 | -0.51758 |
| C | 5.00525  | 3.13617  | -0.66389 |
| H | 4.02835  | 2.93987  | 1.26386  |
| C | 5.57574  | 1.07456  | -1.83239 |
| C | 4.55293  | -3.67808 | 0.47381  |
| H | 3.63820  | -2.74638 | 2.20592  |
| C | 5.36423  | -2.19618 | -1.28337 |
| C | 5.54947  | 2.47348  | -1.78278 |
| H | 4.99414  | 4.23164  | -0.63900 |
| H | 5.99921  | 0.55890  | -2.70189 |
| C | 5.16321  | -3.48845 | -0.78280 |
| H | 4.40541  | -4.69548 | 0.85289  |
| H | 5.84147  | -2.04809 | -2.25877 |
| H | 5.95506  | 3.05772  | -2.61572 |
| H | 5.48130  | -4.35725 | -1.36885 |

**L<sub>1</sub>Co<sup>III</sup>O + Fluorene (S=2)**

97

|                    |          |                  |          |
|--------------------|----------|------------------|----------|
| fluorene_ts_u4.out | Energy:  | -2110966.6862674 |          |
| C                  | -0.87314 | -0.67459         | -1.26175 |
| N                  | -0.35357 | -1.14340         | -2.42422 |
| C                  | -1.36786 | -1.31148         | -3.35731 |
| C                  | -2.53174 | -0.94620         | -2.73751 |
| N                  | -2.21960 | -0.58465         | -1.43887 |
| B                  | -3.14812 | 0.05642          | -0.31668 |

|    |          |          |          |
|----|----------|----------|----------|
| N  | -2.83328 | -0.66289 | 1.06289  |
| C  | -1.59478 | -0.72649 | 1.61562  |
| N  | -1.70769 | -1.43070 | 2.76840  |
| C  | -3.03159 | -1.81476 | 2.95256  |
| C  | -3.73043 | -1.33201 | 1.88132  |
| N  | -2.63214 | 1.54671  | -0.23437 |
| C  | -1.35666 | 1.84001  | 0.14778  |
| N  | -1.17425 | 3.16375  | -0.10556 |
| C  | -2.32223 | 3.69723  | -0.68380 |
| C  | -3.22405 | 2.67786  | -0.77464 |
| Co | -0.15641 | 0.14593  | 0.49105  |
| O  | 1.44625  | 0.58715  | 0.99298  |
| C  | 1.10204  | -1.45481 | -2.60677 |
| C  | 1.32934  | -2.06414 | -3.99505 |
| C  | 1.91263  | -0.15710 | -2.46532 |
| C  | 1.51079  | -2.46402 | -1.52305 |
| C  | -0.54403 | -1.72961 | 3.66371  |
| C  | -1.02380 | -2.53211 | 4.87868  |
| C  | 0.48551  | -2.55099 | 2.86740  |
| C  | 0.07500  | -0.39754 | 4.12053  |
| C  | 0.11018  | 3.90364  | 0.12681  |
| C  | 0.55571  | 3.67080  | 1.57922  |
| C  | 1.15990  | 3.36536  | -0.85901 |
| C  | -0.10777 | 5.40410  | -0.10952 |
| H  | 2.39849  | -2.30654 | -4.09960 |
| H  | 0.75793  | -2.99715 | -4.13269 |
| H  | 1.56686  | 0.60264  | -3.18627 |
| H  | 2.97913  | -0.36157 | -2.64834 |
| H  | 1.82893  | 0.24874  | -1.44629 |
| H  | 0.88666  | -3.37175 | -1.57923 |
| H  | 1.40838  | -2.02519 | -0.51942 |
| H  | 2.56524  | -2.74817 | -1.65053 |
| H  | -1.46360 | -3.49931 | 4.58395  |
| H  | -1.76247 | -1.96995 | 5.47365  |
| H  | -0.15989 | -2.74142 | 5.52867  |
| H  | 0.03036  | -3.47293 | 2.46882  |
| H  | 1.32510  | -2.83155 | 3.52458  |
| H  | -0.67646 | 0.22437  | 4.63551  |
| H  | 0.90345  | -0.59539 | 4.82101  |
| H  | 0.47793  | 0.15885  | 3.25929  |
| H  | 1.47643  | 4.24566  | 1.77568  |
| H  | -0.22360 | 4.00969  | 2.28301  |
| H  | 2.11130  | 3.90799  | -0.73434 |
| H  | 1.35321  | 2.30199  | -0.66157 |
| H  | -0.88669 | 5.81469  | 0.55469  |
| H  | -0.37622 | 5.62610  | -1.15553 |
| H  | 0.83382  | 5.93253  | 0.10756  |
| H  | 1.06527  | -1.36018 | -4.80174 |
| H  | 0.81626  | 3.49156  | -1.89996 |
| H  | 0.89300  | -1.96464 | 2.02931  |
| C  | -4.73602 | -0.10206 | -0.57589 |
| C  | -5.27566 | -1.26143 | -1.17277 |
| C  | -6.65660 | -1.47747 | -1.26391 |
| C  | -7.55075 | -0.53770 | -0.73845 |
| C  | -7.04551 | 0.60277  | -0.10352 |
| C  | -5.66234 | 0.80600  | -0.01978 |
| H  | -4.60658 | -2.03891 | -1.55380 |
| H  | -7.03440 | -2.38949 | -1.73877 |
| H  | -8.63149 | -0.70081 | -0.80835 |

|   |          |          |          |
|---|----------|----------|----------|
| H | -7.73072 | 1.33449  | 0.33817  |
| H | -5.30177 | 1.68713  | 0.51993  |
| H | -1.20386 | -1.67079 | -4.36874 |
| H | -3.54225 | -0.91407 | -3.13578 |
| H | -3.37961 | -2.38828 | 3.80627  |
| H | -4.78845 | -1.41827 | 1.64813  |
| H | -2.42197 | 4.73768  | -0.97639 |
| H | -4.22949 | 2.68120  | -1.18671 |
| H | 0.77366  | 2.60630  | 1.74878  |
| H | 2.57903  | 0.12746  | 1.14375  |
| C | 3.86994  | -0.17246 | 1.35276  |
| C | 4.49705  | 0.83481  | 0.47941  |
| H | 3.90476  | -0.05825 | 2.44611  |
| C | 4.20060  | -1.46951 | 0.74079  |
| C | 4.51777  | 2.23375  | 0.57078  |
| C | 5.04087  | 0.19136  | -0.67246 |
| C | 3.93528  | -2.77987 | 1.16441  |
| C | 4.87151  | -1.25111 | -0.50158 |
| C | 5.08163  | 2.97930  | -0.47243 |
| H | 4.08182  | 2.73777  | 1.44003  |
| C | 5.59389  | 0.94520  | -1.71591 |
| C | 4.33542  | -3.85545 | 0.36095  |
| H | 3.41842  | -2.95965 | 2.11275  |
| C | 5.25803  | -2.33234 | -1.30427 |
| C | 5.61312  | 2.34223  | -1.61011 |
| H | 5.10234  | 4.07268  | -0.40722 |
| H | 6.00335  | 0.45073  | -2.60383 |
| C | 4.99065  | -3.63619 | -0.86566 |
| H | 4.13336  | -4.88089 | 0.68890  |
| H | 5.76953  | -2.16224 | -2.25810 |
| H | 6.04281  | 2.94415  | -2.41785 |
| H | 5.29038  | -4.49080 | -1.48126 |

**L<sub>1</sub>Co<sup>III</sup>O + Ph<sub>2</sub>CH<sub>2</sub> (S=0, closed-shell)**

99

ph2ch2\_ts\_u0\_closed.out Energy: -2111718.7042639

|    |          |          |          |
|----|----------|----------|----------|
| C  | -1.28865 | -0.19138 | 1.58188  |
| N  | -0.97627 | -0.36956 | 2.90297  |
| C  | -2.15616 | -0.43474 | 3.64032  |
| C  | -3.18897 | -0.28595 | 2.76184  |
| N  | -2.64049 | -0.11454 | 1.50669  |
| B  | -3.29282 | -0.00353 | 0.08157  |
| N  | -2.56262 | 1.19985  | -0.62303 |
| C  | -1.21246 | 1.26606  | -0.73470 |
| N  | -0.92920 | 2.42544  | -1.40968 |
| C  | -2.12674 | 3.07072  | -1.71028 |
| C  | -3.13897 | 2.30264  | -1.21741 |
| N  | -2.75489 | -1.29029 | -0.63827 |
| C  | -1.40915 | -1.42287 | -0.72242 |
| N  | -1.16719 | -2.62656 | -1.32490 |
| C  | -2.38225 | -3.25644 | -1.58098 |
| C  | -3.36823 | -2.42186 | -1.13916 |
| Co | -0.18169 | -0.13870 | 0.01776  |
| O  | 1.49137  | 0.24197  | -0.07003 |
| C  | 0.40445  | -0.42694 | 3.49665  |
| C  | 0.30626  | -0.67268 | 5.00898  |

|   |          |          |          |
|---|----------|----------|----------|
| C | 1.18385  | -1.58262 | 2.85187  |
| C | 1.09485  | 0.92277  | 3.24193  |
| C | 0.42819  | 2.98480  | -1.76223 |
| C | 0.25843  | 4.27784  | -2.57504 |
| C | 1.17586  | 3.30640  | -0.46024 |
| C | 1.18548  | 1.96011  | -2.62153 |
| C | 0.18403  | -3.15741 | -1.71421 |
| C | 0.80104  | -2.18732 | -2.73483 |
| C | 1.06328  | -3.27407 | -0.46148 |
| C | 0.03140  | -4.54406 | -2.35320 |
| H | 1.32770  | -0.71728 | 5.41763  |
| H | -0.22283 | 0.14195  | 5.52975  |
| H | 0.63440  | -2.53258 | 2.95767  |
| H | 2.16526  | -1.68759 | 3.34184  |
| H | 1.37000  | -1.38854 | 1.78845  |
| H | 0.51307  | 1.74459  | 3.69213  |
| H | 1.20912  | 1.10487  | 2.16443  |
| H | 2.09849  | 0.91589  | 3.69701  |
| H | -0.25445 | 5.06879  | -2.00368 |
| H | -0.28011 | 4.10873  | -3.52233 |
| H | 1.26288  | 4.65333  | -2.82523 |
| H | 0.61321  | 4.04911  | 0.13147  |
| H | 2.17062  | 3.72143  | -0.68996 |
| H | 0.60789  | 1.71517  | -3.52927 |
| H | 2.15382  | 2.38901  | -2.92774 |
| H | 1.38525  | 1.04908  | -2.04311 |
| H | 1.79237  | -2.55407 | -3.04260 |
| H | 0.15713  | -2.10122 | -3.62626 |
| H | 2.02066  | -3.75245 | -0.71848 |
| H | 1.30858  | -2.28340 | -0.05729 |
| H | -0.41173 | -5.27261 | -1.65421 |
| H | 1.03396  | -4.90930 | -2.62523 |
| H | -0.57358 | -4.51436 | -3.27420 |
| H | -0.18831 | -1.63045 | 5.24048  |
| H | 0.55919  | -3.87142 | 0.31614  |
| H | 1.32800  | 2.39249  | 0.12749  |
| C | -4.88150 | 0.24949  | 0.03694  |
| C | -5.52251 | 1.05226  | 1.00500  |
| C | -6.87858 | 1.38909  | 0.91118  |
| C | -7.63941 | 0.94260  | -0.17549 |
| C | -7.02173 | 0.17987  | -1.17307 |
| C | -5.66451 | -0.14977 | -1.06692 |
| H | -4.94859 | 1.45552  | 1.84474  |
| H | -7.33958 | 2.01131  | 1.68590  |
| H | -8.70074 | 1.20145  | -0.25280 |
| H | -7.59572 | -0.15298 | -2.04463 |
| H | -5.20542 | -0.70785 | -1.88798 |
| H | -2.18091 | -0.57963 | 4.71482  |
| H | -4.26004 | -0.30383 | 2.94273  |
| H | -2.17629 | 4.01306  | -2.24392 |
| H | -4.21490 | 2.45488  | -1.24583 |
| H | -2.46128 | -4.23231 | -2.04831 |
| H | -4.44521 | -2.56442 | -1.13659 |
| H | 0.93624  | -1.18963 | -2.29214 |
| H | 2.56300  | 0.13068  | 0.36094  |
| C | 3.91689  | -0.05731 | 0.79614  |
| H | 3.84635  | -0.19202 | 1.88553  |
| C | 4.37850  | 1.28989  | 0.43758  |
| C | 4.25011  | -1.30776 | 0.09818  |

|   |         |          |          |
|---|---------|----------|----------|
| C | 4.94853 | 1.66025  | -0.80756 |
| C | 4.17199 | 2.34484  | 1.36919  |
| C | 4.54568 | -2.47736 | 0.84564  |
| C | 4.18180 | -1.46310 | -1.31123 |
| C | 5.25836 | 2.99196  | -1.10610 |
| H | 5.16756 | 0.89351  | -1.55329 |
| C | 4.48440 | 3.66986  | 1.07187  |
| H | 3.74063 | 2.10263  | 2.34652  |
| C | 4.78975 | -3.70752 | 0.23109  |
| H | 4.58516 | -2.40519 | 1.93889  |
| C | 4.44072 | -2.69069 | -1.92692 |
| H | 3.87315 | -0.61775 | -1.93010 |
| C | 5.02355 | 4.01418  | -0.17802 |
| H | 5.69632 | 3.23115  | -2.08233 |
| H | 4.29988 | 4.44795  | 1.82163  |
| C | 4.75277 | -3.82571 | -1.16618 |
| H | 5.01781 | -4.58376 | 0.84886  |
| H | 4.37931 | -2.76611 | -3.01871 |
| H | 5.26261 | 5.05533  | -0.41784 |
| H | 4.95212 | -4.78658 | -1.65168 |

**L<sub>1</sub>Co<sup>III</sup>O + Ph<sub>2</sub>CH<sub>2</sub> (S=1)**

99

ph2ch2\_ts\_u2.out Energy: -2111715.9297622

|    |          |          |          |
|----|----------|----------|----------|
| C  | -1.53814 | -0.84377 | -1.49761 |
| N  | -1.59856 | -1.34992 | -2.75844 |
| C  | -2.91451 | -1.32283 | -3.21121 |
| C  | -3.66840 | -0.80928 | -2.19608 |
| N  | -2.81917 | -0.54902 | -1.13441 |
| B  | -3.14432 | 0.16332  | 0.24396  |
| N  | -2.34832 | -0.61525 | 1.35429  |
| C  | -1.01196 | -0.80482 | 1.26484  |
| N  | -0.63814 | -1.54714 | 2.33755  |
| C  | -1.76141 | -1.82876 | 3.11596  |
| C  | -2.82681 | -1.24219 | 2.49545  |
| N  | -2.48318 | 1.59307  | 0.10419  |
| C  | -1.13215 | 1.74111  | -0.00595 |
| N  | -0.90465 | 3.06382  | -0.22521 |
| C  | -2.11692 | 3.74187  | -0.30545 |
| C  | -3.09936 | 2.81409  | -0.11190 |
| Co | -0.14321 | -0.01082 | -0.29960 |
| O  | 1.40867  | 0.17441  | -1.05180 |
| C  | -0.41642 | -1.81180 | -3.55579 |
| C  | -0.89924 | -2.65688 | -4.74301 |
| C  | 0.34341  | -0.57262 | -4.05743 |
| C  | 0.48102  | -2.66737 | -2.64885 |
| C  | 0.76045  | -2.02825 | 2.56196  |
| C  | 0.84808  | -2.76314 | 3.90434  |
| C  | 1.13086  | -2.98119 | 1.41514  |
| C  | 1.70165  | -0.81454 | 2.57387  |
| C  | 0.45187  | 3.68087  | -0.39226 |
| C  | 1.37760  | 3.12610  | 0.69788  |
| C  | 0.98450  | 3.31995  | -1.78846 |
| C  | 0.34471  | 5.20475  | -0.24315 |
| H  | -0.01921 | -3.05096 | -5.27514 |
| H  | -1.50919 | -3.51367 | -4.41080 |

|   |          |          |          |
|---|----------|----------|----------|
| H | -0.31678 | 0.06391  | -4.67130 |
| H | 1.19861  | -0.88644 | -4.67989 |
| H | 0.72693  | 0.00219  | -3.19981 |
| H | -0.08666 | -3.50625 | -2.21270 |
| H | 0.90867  | -2.05663 | -1.84187 |
| H | 1.31294  | -3.08090 | -3.24240 |
| H | 0.20752  | -3.66003 | 3.92469  |
| H | 0.57330  | -2.10787 | 4.74761  |
| H | 1.88755  | -3.09360 | 4.05678  |
| H | 0.44936  | -3.84829 | 1.39304  |
| H | 2.16434  | -3.34040 | 1.53622  |
| H | 1.39989  | -0.08698 | 3.34545  |
| H | 2.72940  | -1.15228 | 2.77995  |
| H | 1.71225  | -0.31004 | 1.59530  |
| H | 2.36621  | 3.60300  | 0.62245  |
| H | 0.96473  | 3.32450  | 1.70147  |
| H | 1.97626  | 3.77964  | -1.93637 |
| H | 1.09405  | 2.22746  | -1.87302 |
| H | -0.09776 | 5.48898  | 0.72644  |
| H | -0.24518 | 5.66456  | -1.05314 |
| H | 1.35859  | 5.63225  | -0.29255 |
| H | -1.48094 | -2.06445 | -5.46805 |
| H | 0.30377  | 3.69287  | -2.57317 |
| H | 1.07277  | -2.46325 | 0.44604  |
| C | -4.70200 | 0.16195  | 0.67089  |
| C | -5.54859 | -0.92454 | 0.36354  |
| C | -6.85612 | -1.01136 | 0.85809  |
| C | -7.35675 | -0.01100 | 1.69934  |
| C | -6.52736 | 1.05891  | 2.05489  |
| C | -5.22181 | 1.13322  | 1.55298  |
| H | -5.17609 | -1.74471 | -0.25788 |
| H | -7.48271 | -1.86966 | 0.59206  |
| H | -8.37904 | -0.07299 | 2.08740  |
| H | -6.89430 | 1.83609  | 2.73417  |
| H | -4.58779 | 1.96182  | 1.88324  |
| H | -3.21742 | -1.66997 | -4.19406 |
| H | -4.73675 | -0.61311 | -2.15893 |
| H | -1.72149 | -2.40704 | 4.03393  |
| H | -3.87689 | -1.22144 | 2.77649  |
| H | -2.19564 | 4.81034  | -0.48067 |
| H | -4.17910 | 2.93863  | -0.11469 |
| H | 1.52368  | 2.04544  | 0.57183  |
| H | 2.58533  | 0.09747  | -0.80174 |
| C | 3.94467  | -0.00096 | -0.72369 |
| H | 4.08641  | 0.06809  | -1.81415 |
| C | 4.21909  | -1.37793 | -0.25203 |
| C | 4.38164  | 1.23706  | -0.04975 |
| C | 4.86250  | -1.72192 | 0.95828  |
| C | 3.80220  | -2.45000 | -1.08095 |
| C | 4.79097  | 2.34106  | -0.83733 |
| C | 4.32267  | 1.44218  | 1.35010  |
| C | 5.05898  | -3.05947 | 1.32449  |
| H | 5.24117  | -0.93690 | 1.61587  |
| C | 3.99792  | -3.78126 | -0.71843 |
| H | 3.30498  | -2.21600 | -2.02694 |
| C | 5.14550  | 3.56471  | -0.26435 |
| H | 4.82992  | 2.22657  | -1.92659 |
| C | 4.69005  | 2.66096  | 1.92621  |
| H | 3.95288  | 0.64703  | 1.99814  |



|   |         |          |          |
|---|---------|----------|----------|
| C | 4.62531 | -4.10052 | 0.49591  |
| H | 5.56503 | -3.28675 | 2.26941  |
| H | 3.65395 | -4.57943 | -1.38560 |
| C | 5.10808 | 3.73287  | 1.12679  |
| H | 5.45809 | 4.39346  | -0.90914 |
| H | 4.63055 | 2.78010  | 3.01362  |
| H | 4.77616 | -5.14486 | 0.78773  |
| H | 5.38974 | 4.68888  | 1.57986  |

**L<sub>1</sub>Co<sup>III</sup>O + Ph<sub>2</sub>CH<sub>2</sub> (S=2)**

99

ph2ch2\_ts\_u4.out Energy: -2111713.9799961

|    |          |          |          |
|----|----------|----------|----------|
| C  | -1.35298 | -1.52215 | -0.90958 |
| N  | -1.19777 | -2.53532 | -1.80109 |
| C  | -2.42093 | -2.84268 | -2.38533 |
| C  | -3.34065 | -2.00076 | -1.82488 |
| N  | -2.67890 | -1.21193 | -0.89940 |
| B  | -3.21821 | 0.04593  | -0.09374 |
| N  | -2.65653 | -0.02700 | 1.38171  |
| C  | -1.33321 | -0.10980 | 1.69005  |
| N  | -1.24859 | -0.10546 | 3.04465  |
| C  | -2.52488 | -0.02187 | 3.59853  |
| C  | -3.40041 | 0.02701  | 2.55389  |
| N  | -2.52869 | 1.27932  | -0.82042 |
| C  | -1.17544 | 1.43543  | -0.79992 |
| N  | -0.89383 | 2.48914  | -1.60917 |
| C  | -2.06488 | 2.97759  | -2.17550 |
| C  | -3.08274 | 2.20585  | -1.68744 |
| Co | -0.13443 | -0.14665 | 0.01687  |
| O  | 1.56708  | -0.27014 | 0.44895  |
| C  | 0.12787  | -3.15042 | -2.12711 |
| C  | -0.07824 | -4.36453 | -3.04112 |
| C  | 0.98507  | -2.09276 | -2.84389 |
| C  | 0.80046  | -3.59059 | -0.81642 |
| C  | 0.04731  | -0.15638 | 3.79501  |
| C  | -0.22778 | -0.13684 | 5.30372  |
| C  | 0.78013  | -1.45379 | 3.41397  |
| C  | 0.88286  | 1.07338  | 3.39826  |
| C  | 0.49776  | 2.98708  | -1.85168 |
| C  | 1.16205  | 3.25613  | -0.49269 |
| C  | 1.27042  | 1.90355  | -2.62075 |
| C  | 0.45019  | 4.27993  | -2.67429 |
| H  | 0.89997  | -4.83171 | -3.23488 |
| H  | -0.72728 | -5.12141 | -2.57024 |
| H  | 0.45053  | -1.67914 | -3.71500 |
| H  | 1.92619  | -2.54483 | -3.19684 |
| H  | 1.23720  | -1.27073 | -2.15692 |
| H  | 0.15599  | -4.29829 | -0.26848 |
| H  | 1.01207  | -2.72160 | -0.17427 |
| H  | 1.75899  | -4.08668 | -1.03804 |
| H  | -0.82476 | -1.00700 | 5.62410  |
| H  | -0.74487 | 0.78553  | 5.61662  |
| H  | 0.73479  | -0.17697 | 5.83751  |
| H  | 0.15390  | -2.33346 | 3.64119  |
| H  | 1.71618  | -1.53456 | 3.99219  |
| H  | 0.33769  | 2.00430  | 3.63008  |

|   |          |          |          |
|---|----------|----------|----------|
| H | 1.83188  | 1.07674  | 3.96086  |
| H | 1.11965  | 1.04131  | 2.32407  |
| H | 2.17814  | 3.65193  | -0.64445 |
| H | 0.57635  | 3.98996  | 0.08644  |
| H | 2.28754  | 2.25829  | -2.84987 |
| H | 1.36433  | 0.99580  | -2.00707 |
| H | 0.02304  | 4.11738  | -3.67774 |
| H | 1.47902  | 4.65006  | -2.80655 |
| H | -0.12902 | 5.06657  | -2.16263 |
| H | -0.50937 | -4.08041 | -4.01522 |
| H | 0.75814  | 1.64790  | -3.56329 |
| H | 1.03689  | -1.44592 | 2.34370  |
| C | -4.83035 | 0.13492  | 0.00904  |
| C | -5.62111 | -1.02663 | 0.14192  |
| C | -6.99959 | -0.96587 | 0.38216  |
| C | -7.63523 | 0.27388  | 0.51626  |
| C | -6.87131 | 1.44345  | 0.43089  |
| C | -5.49349 | 1.36739  | 0.19039  |
| H | -5.15066 | -2.01314 | 0.08634  |
| H | -7.57714 | -1.89211 | 0.47506  |
| H | -8.71318 | 0.32753  | 0.70249  |
| H | -7.34743 | 2.42128  | 0.56232  |
| H | -4.92123 | 2.29987  | 0.17504  |
| H | -2.55525 | -3.61830 | -3.13318 |
| H | -4.40443 | -1.91067 | -2.02811 |
| H | -2.71858 | -0.00562 | 4.66657  |
| H | -4.48499 | 0.09495  | 2.56036  |
| H | -2.09831 | 3.81776  | -2.86264 |
| H | -4.14640 | 2.25230  | -1.90533 |
| H | 1.25290  | 2.32674  | 0.08859  |
| H | 2.61314  | -0.19829 | -0.21398 |
| C | 3.80773  | -0.07332 | -0.76814 |
| H | 3.63590  | -0.16211 | -1.85199 |
| C | 4.49348  | -1.26955 | -0.22451 |
| C | 4.20289  | 1.30381  | -0.36872 |
| C | 5.25678  | -1.26940 | 0.96500  |
| C | 4.33326  | -2.50906 | -0.88931 |
| C | 4.70462  | 2.21814  | -1.31756 |
| C | 4.01887  | 1.76408  | 0.95384  |
| C | 5.81535  | -2.44947 | 1.46760  |
| H | 5.42556  | -0.33116 | 1.49973  |
| C | 4.88866  | -3.68680 | -0.38768 |
| H | 3.75188  | -2.53848 | -1.81586 |
| C | 5.02759  | 3.53219  | -0.95989 |
| H | 4.84358  | 1.88827  | -2.35322 |
| C | 4.34836  | 3.07280  | 1.31534  |
| H | 3.56544  | 1.09285  | 1.68774  |
| C | 5.63286  | -3.66795 | 0.80123  |
| H | 6.40410  | -2.41442 | 2.39101  |
| H | 4.74104  | -4.62807 | -0.92872 |
| C | 4.85627  | 3.96549  | 0.36114  |
| H | 5.41523  | 4.22166  | -1.71778 |
| H | 4.18833  | 3.40627  | 2.34653  |
| H | 6.06931  | -4.59007 | 1.19860  |
| H | 5.10657  | 4.99359  | 0.64285  |

$\text{LiCo}^{\text{III}}\text{O} + 9\text{-Ph-Fluorene}$  ( $S=0$ , closed-shell)

107

|                        |          |                  |          |
|------------------------|----------|------------------|----------|
| phflu_ts_u0_closed.out | Energy:  | -2255927.7441641 |          |
| C                      | 1.57534  | -1.77165         | -0.21029 |
| N                      | 1.14670  | -3.05792         | -0.38147 |
| C                      | 2.25092  | -3.90510         | -0.39644 |
| C                      | 3.35965  | -3.12234         | -0.24725 |
| N                      | 2.92889  | -1.81362         | -0.16176 |
| B                      | 3.67525  | -0.45449         | 0.08715  |
| N                      | 3.07410  | 0.53900          | -0.96785 |
| C                      | 1.74108  | 0.75359          | -1.06644 |
| N                      | 1.55854  | 1.63922          | -2.09634 |
| C                      | 2.80417  | 1.96623          | -2.62842 |
| C                      | 3.74340  | 1.27754          | -1.92043 |
| N                      | 3.09123  | 0.00177          | 1.47034  |
| C                      | 1.74707  | 0.14296          | 1.58744  |
| N                      | 1.49166  | 0.39915          | 2.90858  |
| C                      | 2.69424  | 0.38521          | 3.60954  |
| C                      | 3.68497  | 0.12671          | 2.70907  |
| Co                     | 0.56392  | -0.14908         | 0.10809  |
| O                      | -1.06143 | 0.36559          | 0.08332  |
| C                      | -0.27722 | -3.48839         | -0.60083 |
| C                      | -0.32900 | -5.00334         | -0.84009 |
| C                      | -1.11091 | -3.14485         | 0.64239  |
| C                      | -0.81029 | -2.75922         | -1.84215 |
| C                      | 0.26194  | 2.23944          | -2.57775 |
| C                      | 0.53076  | 3.15027          | -3.78540 |
| C                      | -0.68753 | 1.11288          | -3.01287 |
| C                      | -0.33334 | 3.07714          | -1.43782 |
| C                      | 0.14756  | 0.64101          | 3.54487  |
| C                      | -0.47389 | 1.89454          | 2.91016  |
| C                      | -0.73051 | -0.60044         | 3.33264  |
| C                      | 0.32318  | 0.87471          | 5.05249  |
| H                      | -1.37801 | -5.28501         | -1.02106 |
| H                      | 0.25444  | -5.30391         | -1.72578 |
| H                      | -0.64708 | -3.55916         | 1.55280  |
| H                      | -2.12328 | -3.56246         | 0.53484  |
| H                      | -1.22632 | -2.05853         | 0.75458  |
| H                      | -0.19557 | -2.99783         | -2.72650 |
| H                      | -0.81062 | -1.67076         | -1.69064 |
| H                      | -1.84950 | -3.06183         | -2.03567 |
| H                      | 0.96944  | 2.59926          | -4.63374 |
| H                      | 1.18268  | 4.00179          | -3.53090 |
| H                      | -0.43362 | 3.56345          | -4.11953 |
| H                      | -0.22244 | 0.49378          | -3.79854 |
| H                      | -1.61127 | 1.55560          | -3.41929 |
| H                      | 0.36766  | 3.87669          | -1.14245 |
| H                      | -1.27609 | 3.54178          | -1.76669 |
| H                      | -0.55987 | 2.44059          | -0.57281 |
| H                      | -1.45772 | 2.08711          | 3.36748  |
| H                      | 0.17115  | 2.77321          | 3.08004  |
| H                      | -1.67929 | -0.48784         | 3.87834  |
| H                      | -0.98265 | -0.72554         | 2.27311  |
| H                      | 0.94757  | 1.75714          | 5.26850  |
| H                      | 0.75002  | -0.00438         | 5.56276  |
| H                      | -0.67213 | 1.05866          | 5.48600  |
| H                      | 0.02409  | -5.57356         | 0.03514  |
| H                      | -0.21485 | -1.50488         | 3.69658  |
| H                      | -0.96446 | 0.48042          | -2.16080 |
| C                      | 5.27813  | -0.45953         | -0.04761 |

|   |          |          |          |
|---|----------|----------|----------|
| C | 5.94532  | -1.31147 | -0.95286 |
| C | 7.32685  | -1.22881 | -1.16905 |
| C | 8.08760  | -0.26913 | -0.49184 |
| C | 7.44723  | 0.61764  | 0.38159  |
| C | 6.06549  | 0.52412  | 0.58888  |
| H | 5.37666  | -2.04367 | -1.53325 |
| H | 7.80829  | -1.91161 | -1.87745 |
| H | 9.16828  | -0.20171 | -0.65606 |
| H | 8.02381  | 1.39286  | 0.89774  |
| H | 5.59144  | 1.26017  | 1.24549  |
| H | 2.17563  | -4.98125 | -0.51082 |
| H | 4.40593  | -3.40845 | -0.18544 |
| H | 2.93358  | 2.65320  | -3.45701 |
| H | 4.82557  | 1.25527  | -2.02118 |
| H | 2.76282  | 0.55909  | 4.67755  |
| H | 4.75399  | 0.01409  | 2.86644  |
| H | -0.62073 | 1.74828  | 1.83151  |
| H | -2.32520 | 0.45300  | -0.00684 |
| C | -3.66905 | 0.49910  | -0.08481 |
| C | -4.02153 | -0.03873 | 1.25290  |
| C | -3.95329 | -0.61639 | -1.01396 |
| C | -4.07253 | 0.57201  | 2.51632  |
| C | -4.31353 | -1.43269 | 1.14233  |
| C | -3.86401 | -0.70073 | -2.41462 |
| C | -4.28475 | -1.78929 | -0.26940 |
| C | -4.37268 | -0.19933 | 3.64532  |
| H | -3.88454 | 1.64375  | 2.62465  |
| C | -4.58443 | -2.20296 | 2.28310  |
| C | -4.13199 | -1.91628 | -3.05400 |
| H | -3.58821 | 0.17703  | -3.00545 |
| C | -4.52945 | -3.00932 | -0.91745 |
| C | -4.61009 | -1.58327 | 3.53735  |
| H | -4.41400 | 0.28070  | 4.62944  |
| H | -4.78815 | -3.27573 | 2.18997  |
| C | -4.46454 | -3.06799 | -2.31363 |
| H | -4.07334 | -1.97521 | -4.14642 |
| H | -4.77801 | -3.90434 | -0.33607 |
| H | -4.82639 | -2.17153 | 4.43543  |
| H | -4.66475 | -4.01118 | -2.83277 |
| C | -3.90322 | 1.93192  | -0.42712 |
| C | -3.26061 | 2.94706  | 0.31596  |
| C | -4.74058 | 2.33847  | -1.48773 |
| C | -3.45445 | 4.29991  | 0.02418  |
| H | -2.57167 | 2.66292  | 1.11385  |
| C | -4.92218 | 3.69229  | -1.79359 |
| H | -5.26847 | 1.58158  | -2.07443 |
| C | -4.28250 | 4.68395  | -1.03853 |
| H | -2.93674 | 5.06051  | 0.61909  |
| H | -5.57917 | 3.97448  | -2.62400 |
| H | -4.42723 | 5.74310  | -1.27615 |

**L<sub>1</sub>Co<sup>III</sup>O + 9-Ph-Fluorene (S=1)**

107

|                     |         |                  |          |
|---------------------|---------|------------------|----------|
| phflu_ts_u2_opt.out | Energy: | -2254315.8488442 |          |
| C                   | 1.46323 | -1.56402         | -0.52701 |
| N                   | 1.04729 | -2.84649         | -0.70141 |

|    |          |          |          |
|----|----------|----------|----------|
| C  | 2.13609  | -3.70566 | -0.60259 |
| C  | 3.23549  | -2.92649 | -0.38115 |
| N  | 2.81540  | -1.60896 | -0.36896 |
| B  | 3.63546  | -0.30687 | -0.01179 |
| N  | 3.11160  | 0.81184  | -0.97587 |
| C  | 1.79870  | 1.11062  | -1.03502 |
| N  | 1.64024  | 2.10747  | -1.94494 |
| C  | 2.89399  | 2.43710  | -2.46425 |
| C  | 3.80645  | 1.62421  | -1.85607 |
| N  | 3.13333  | 0.07939  | 1.43740  |
| C  | 1.84287  | 0.45519  | 1.66075  |
| N  | 1.69921  | 0.56893  | 3.00902  |
| C  | 2.89020  | 0.21809  | 3.63632  |
| C  | 3.77716  | -0.09954 | 2.64849  |
| Co | 0.61091  | 0.14203  | 0.08910  |
| O  | -1.06870 | 0.17175  | 0.39467  |
| C  | -0.37456 | -3.26302 | -0.93821 |
| C  | -0.40808 | -4.70706 | -1.45673 |
| C  | -1.14067 | -3.16273 | 0.38993  |
| C  | -0.97834 | -2.33063 | -1.99495 |
| C  | 0.33706  | 2.77667  | -2.27147 |
| C  | 0.55826  | 3.82219  | -3.37120 |
| C  | -0.66200 | 1.71685  | -2.76259 |
| C  | -0.18213 | 3.46019  | -0.99777 |
| C  | 0.43139  | 0.96022  | 3.70936  |
| C  | -0.14338 | 2.19633  | 3.00348  |
| C  | -0.55098 | -0.22002 | 3.63610  |
| C  | 0.73707  | 1.30245  | 5.17378  |
| H  | -1.45252 | -4.96540 | -1.69210 |
| H  | 0.18786  | -4.82414 | -2.37738 |
| H  | -0.68383 | -3.81756 | 1.15171  |
| H  | -2.18800 | -3.46907 | 0.24157  |
| H  | -1.14342 | -2.12332 | 0.74977  |
| H  | -0.37200 | -2.34193 | -2.91637 |
| H  | -1.04476 | -1.30226 | -1.61850 |
| H  | -1.99816 | -2.65946 | -2.23732 |
| H  | 0.94281  | 3.36696  | -4.29886 |
| H  | 1.24734  | 4.62013  | -3.04948 |
| H  | -0.40954 | 4.29303  | -3.60384 |
| H  | -0.26859 | 1.17994  | -3.64154 |
| H  | -1.60654 | 2.21015  | -3.04311 |
| H  | 0.54780  | 4.19825  | -0.62519 |
| H  | -1.13403 | 3.97401  | -1.20378 |
| H  | -0.37741 | 2.71841  | -0.20974 |
| H  | -1.06216 | 2.52120  | 3.51835  |
| H  | 0.58032  | 3.02825  | 3.01760  |
| H  | -1.47833 | 0.02837  | 4.17728  |
| H  | -0.81710 | -0.43129 | 2.58969  |
| H  | 1.49134  | 2.10266  | 5.25756  |
| H  | 1.08174  | 0.42425  | 5.74384  |
| H  | -0.19008 | 1.65797  | 5.65012  |
| H  | -0.05201 | -5.43077 | -0.70524 |
| H  | -0.10912 | -1.11965 | 4.09742  |
| H  | -0.89409 | 0.98871  | -1.97174 |
| C  | 5.23314  | -0.41778 | -0.18623 |
| C  | 5.80843  | -1.21007 | -1.20216 |
| C  | 7.18539  | -1.20168 | -1.45827 |
| C  | 8.03408  | -0.37921 | -0.70831 |
| C  | 7.48709  | 0.44568  | 0.28147  |

|   |          |          |          |
|---|----------|----------|----------|
| C | 6.10848  | 0.42785  | 0.52774  |
| H | 5.16833  | -1.83653 | -1.83125 |
| H | 7.59522  | -1.83439 | -2.25303 |
| H | 9.11171  | -0.37042 | -0.90353 |
| H | 8.13496  | 1.11324  | 0.85989  |
| H | 5.70798  | 1.11146  | 1.28297  |
| H | 2.05707  | -4.78338 | -0.70536 |
| H | 4.27318  | -3.21472 | -0.23350 |
| H | 3.04065  | 3.20756  | -3.21417 |
| H | 4.88473  | 1.55869  | -1.97984 |
| H | 3.02498  | 0.22790  | 4.71329  |
| H | 4.80785  | -0.43678 | 2.72346  |
| H | -0.39932 | 1.95650  | 1.96322  |
| H | -2.26430 | 0.19251  | 0.07302  |
| C | -3.60741 | 0.34558  | -0.10661 |
| C | -4.04072 | -0.43051 | 1.08564  |
| C | -3.93078 | -0.53403 | -1.25214 |
| C | -4.03331 | -0.10747 | 2.45130  |
| C | -4.45093 | -1.73530 | 0.68054  |
| C | -3.78522 | -0.33792 | -2.63564 |
| C | -4.39116 | -1.79745 | -0.77466 |
| C | -4.41406 | -1.07370 | 3.39054  |
| H | -3.72936 | 0.88749  | 2.78718  |
| C | -4.81764 | -2.70127 | 1.62845  |
| C | -4.10939 | -1.37389 | -3.51922 |
| H | -3.41408 | 0.61440  | -3.02382 |
| C | -4.69547 | -2.83721 | -1.66508 |
| C | -4.79667 | -2.36715 | 2.98701  |
| H | -4.40832 | -0.81956 | 4.45629  |
| H | -5.11977 | -3.70457 | 1.30788  |
| C | -4.56172 | -2.61891 | -3.04105 |
| H | -4.00022 | -1.21695 | -4.59786 |
| H | -5.03891 | -3.80690 | -1.28801 |
| H | -5.08174 | -3.11076 | 3.73878  |
| H | -4.80300 | -3.41923 | -3.74845 |
| C | -3.76185 | 1.82962  | -0.16211 |
| C | -3.10130 | 2.64333  | 0.78323  |
| C | -4.55230 | 2.47803  | -1.13454 |
| C | -3.23165 | 4.03384  | 0.76936  |
| H | -2.44489 | 2.16870  | 1.51223  |
| C | -4.66976 | 3.87306  | -1.16268 |
| H | -5.09454 | 1.88092  | -1.87275 |
| C | -4.01282 | 4.66191  | -0.20971 |
| H | -2.69781 | 4.63308  | 1.51536  |
| H | -5.29018 | 4.34630  | -1.93200 |
| H | -4.10686 | 5.75270  | -0.23151 |

**L<sub>1</sub>Co<sup>III</sup>O + 9-Ph-Fluorene (S=2)**

107

phflu\_ts\_u4.out Energy: -2255919.3871311

|   |         |          |          |
|---|---------|----------|----------|
| C | 1.44969 | -1.68936 | -0.41836 |
| N | 1.08623 | -2.98663 | -0.57932 |
| C | 2.21833 | -3.78984 | -0.60945 |
| C | 3.29325 | -2.95384 | -0.47575 |
| N | 2.80922 | -1.66027 | -0.38852 |
| B | 3.58611 | -0.31150 | -0.07057 |

|    |          |          |          |
|----|----------|----------|----------|
| N  | 3.03964  | 0.82885  | -1.03340 |
| C  | 1.73509  | 1.19989  | -1.10012 |
| N  | 1.65348  | 2.22211  | -1.98602 |
| C  | 2.91908  | 2.50557  | -2.48708 |
| C  | 3.78141  | 1.62835  | -1.88945 |
| N  | 3.12445  | 0.02998  | 1.40273  |
| C  | 1.82054  | 0.29950  | 1.69204  |
| N  | 1.73178  | 0.37101  | 3.04649  |
| C  | 2.97348  | 0.10420  | 3.61577  |
| C  | 3.83596  | -0.12216 | 2.58287  |
| Co | 0.51028  | 0.08426  | 0.06095  |
| O  | -1.13191 | 0.37986  | 0.49953  |
| C  | -0.33885 | -3.42778 | -0.73576 |
| C  | -0.38301 | -4.92951 | -1.04085 |
| C  | -1.10003 | -3.13363 | 0.56686  |
| C  | -0.95134 | -2.64158 | -1.90456 |
| C  | 0.37961  | 2.96208  | -2.26486 |
| C  | 0.62564  | 4.01962  | -3.34669 |
| C  | -0.68688 | 1.96298  | -2.74489 |
| C  | -0.07416 | 3.63278  | -0.95799 |
| C  | 0.46157  | 0.64581  | 3.79613  |
| C  | -0.16293 | 1.93346  | 3.23419  |
| C  | -0.48490 | -0.55028 | 3.60249  |
| C  | 0.77094  | 0.83135  | 5.28723  |
| H  | -1.43409 | -5.22759 | -1.17928 |
| H  | 0.16201  | -5.17615 | -1.96722 |
| H  | -0.62776 | -3.64610 | 1.42195  |
| H  | -2.14195 | -3.48057 | 0.47627  |
| H  | -1.13094 | -2.05198 | 0.76507  |
| H  | -0.36410 | -2.79108 | -2.82616 |
| H  | -0.98891 | -1.56585 | -1.67749 |
| H  | -1.98335 | -2.97516 | -2.08302 |
| H  | 0.97318  | 3.56580  | -4.28981 |
| H  | 1.35886  | 4.77652  | -3.02265 |
| H  | -0.32203 | 4.54148  | -3.55239 |
| H  | -0.34777 | 1.42229  | -3.64413 |
| H  | -1.61444 | 2.50697  | -2.98783 |
| H  | 0.70498  | 4.31624  | -0.58008 |
| H  | -0.99821 | 4.20737  | -1.12875 |
| H  | -0.29186 | 2.87239  | -0.19200 |
| H  | -1.09350 | 2.16172  | 3.78025  |
| H  | 0.52934  | 2.78445  | 3.35101  |
| H  | -1.41776 | -0.38905 | 4.16782  |
| H  | -0.74929 | -0.65563 | 2.54117  |
| H  | 1.48023  | 1.65815  | 5.45926  |
| H  | 1.17441  | -0.08708 | 5.74468  |
| H  | -0.16640 | 1.07622  | 5.81110  |
| H  | 0.02811  | -5.53051 | -0.21278 |
| H  | -0.01292 | -1.48067 | 3.96181  |
| H  | -0.92881 | 1.23426  | -1.95680 |
| C  | 5.18571  | -0.38431 | -0.29084 |
| C  | 5.74879  | -1.14086 | -1.34085 |
| C  | 7.11634  | -1.09586 | -1.64015 |
| C  | 7.97024  | -0.26927 | -0.90095 |
| C  | 7.43486  | 0.52446  | 0.11998  |
| C  | 6.06538  | 0.46955  | 0.40834  |
| H  | 5.10445  | -1.76443 | -1.96814 |
| H  | 7.51380  | -1.70217 | -2.46138 |
| H  | 9.04067  | -0.23148 | -1.12949 |

|   |          |          |          |
|---|----------|----------|----------|
| H | 8.08410  | 1.19832  | 0.68955  |
| H | 5.67455  | 1.13566  | 1.18355  |
| H | 2.18897  | -4.86921 | -0.72386 |
| H | 4.35183  | -3.19541 | -0.43131 |
| H | 3.11711  | 3.28537  | -3.21628 |
| H | 4.85544  | 1.51815  | -2.01444 |
| H | 3.15731  | 0.09975  | 4.68559  |
| H | 4.89027  | -0.38364 | 2.60981  |
| H | -0.41130 | 1.80449  | 2.17135  |
| H | -2.33037 | 0.36336  | 0.08744  |
| C | -3.61724 | 0.46488  | -0.16188 |
| C | -4.10943 | -0.26778 | 1.04034  |
| C | -3.88177 | -0.46560 | -1.28717 |
| C | -4.15480 | 0.11248  | 2.38817  |
| C | -4.50023 | -1.58526 | 0.66729  |
| C | -3.66194 | -0.32062 | -2.66486 |
| C | -4.37586 | -1.70344 | -0.78332 |
| C | -4.57071 | -0.81807 | 3.34981  |
| H | -3.86303 | 1.12160  | 2.69245  |
| C | -4.90493 | -2.51395 | 1.63549  |
| C | -3.95834 | -1.38576 | -3.52511 |
| H | -3.26458 | 0.61602  | -3.06587 |
| C | -4.66043 | -2.76869 | -1.64815 |
| C | -4.93640 | -2.12547 | 2.98041  |
| H | -4.60672 | -0.52407 | 4.40444  |
| H | -5.19388 | -3.52961 | 1.34371  |
| C | -4.45913 | -2.60137 | -3.02381 |
| H | -3.79519 | -1.27150 | -4.60213 |
| H | -5.03920 | -3.71792 | -1.25389 |
| H | -5.25029 | -2.84024 | 3.74837  |
| H | -4.68275 | -3.42278 | -3.71247 |
| C | -3.80193 | 1.94462  | -0.28388 |
| C | -3.15141 | 2.81245  | 0.61935  |
| C | -4.61548 | 2.52299  | -1.27920 |
| C | -3.32014 | 4.19740  | 0.54072  |
| H | -2.47512 | 2.38757  | 1.36402  |
| C | -4.77191 | 3.91132  | -1.36911 |
| H | -5.14055 | 1.87562  | -1.98732 |
| C | -4.12792 | 4.75761  | -0.45764 |
| H | -2.79799 | 4.84635  | 1.25224  |
| H | -5.40974 | 4.33369  | -2.15340 |
| H | -4.25199 | 5.84342  | -0.52662 |

**L<sub>1</sub>Co<sup>III</sup>O + 9-tBu-Fluorene (S=0, closed-shell)**

109

tbuflu\_ts\_u0\_closed.out Energy: -2209621.7404222

|   |         |          |          |
|---|---------|----------|----------|
| C | 1.54944 | -1.75863 | -0.19434 |
| N | 1.09266 | -3.03661 | -0.35533 |
| C | 2.17442 | -3.91109 | -0.34162 |
| C | 3.30006 | -3.15458 | -0.18715 |
| N | 2.90159 | -1.83498 | -0.12598 |
| B | 3.68863 | -0.49421 | 0.09188  |
| N | 3.13129 | 0.48168  | -1.00154 |
| C | 1.80755 | 0.73733  | -1.13671 |
| N | 1.68260 | 1.57899  | -2.21221 |
| C | 2.94851 | 1.83645  | -2.73163 |



|    |          |          |          |
|----|----------|----------|----------|
| C  | 3.84641  | 1.14927  | -1.97205 |
| N  | 3.10643  | 0.02115  | 1.45112  |
| C  | 1.76403  | 0.18805  | 1.55019  |
| N  | 1.50217  | 0.47273  | 2.86363  |
| C  | 2.69626  | 0.45584  | 3.57746  |
| C  | 3.69107  | 0.16279  | 2.69245  |
| Co | 0.58055  | -0.09666 | 0.05733  |
| O  | -1.03976 | 0.45625  | -0.11328 |
| C  | -0.33656 | -3.43881 | -0.58722 |
| C  | -0.42258 | -4.95730 | -0.79168 |
| C  | -1.17317 | -3.04675 | 0.63756  |
| C  | -0.83367 | -2.72597 | -1.85255 |
| C  | 0.42386  | 2.19808  | -2.75847 |
| C  | 0.75626  | 3.05191  | -3.99194 |
| C  | -0.54059 | 1.07798  | -3.18023 |
| C  | -0.16387 | 3.10155  | -1.66505 |
| C  | 0.15129  | 0.70236  | 3.48329  |
| C  | -0.47750 | 1.94661  | 2.84095  |
| C  | -0.70341 | -0.55098 | 3.25184  |
| C  | 0.30365  | 0.93362  | 4.99339  |
| H  | -1.47615 | -5.21599 | -0.98032 |
| H  | 0.16399  | -5.29369 | -1.66232 |
| H  | -0.71859 | -3.43485 | 1.56387  |
| H  | -2.18931 | -3.45454 | 0.53971  |
| H  | -1.27726 | -1.95634 | 0.71221  |
| H  | -0.21294 | -3.00230 | -2.72176 |
| H  | -0.80813 | -1.63478 | -1.72567 |
| H  | -1.87765 | -3.00645 | -2.05285 |
| H  | 1.19513  | 2.45314  | -4.80705 |
| H  | 1.43193  | 3.88939  | -3.75347 |
| H  | -0.18404 | 3.48500  | -4.36695 |
| H  | -0.04259 | 0.38921  | -3.88336 |
| H  | -1.41264 | 1.51704  | -3.69073 |
| H  | 0.57006  | 3.87192  | -1.37316 |
| H  | -1.06813 | 3.60708  | -2.03841 |
| H  | -0.44030 | 2.49910  | -0.79006 |
| H  | -1.46836 | 2.12883  | 3.28558  |
| H  | 0.15500  | 2.83348  | 3.01543  |
| H  | -1.64866 | -0.47455 | 3.80781  |
| H  | -0.96615 | -0.65529 | 2.19205  |
| H  | 0.91733  | 1.82103  | 5.21968  |
| H  | 0.73155  | 0.05713  | 5.50722  |
| H  | -0.69914 | 1.10787  | 5.41344  |
| H  | -0.09575 | -5.51549 | 0.10138  |
| H  | -0.16443 | -1.45363 | 3.58447  |
| H  | -0.89905 | 0.51971  | -2.30637 |
| C  | 5.29272  | -0.55409 | -0.02458 |
| C  | 5.94353  | -1.44895 | -0.90004 |
| C  | 7.32917  | -1.41422 | -1.10230 |
| C  | 8.11196  | -0.46087 | -0.44150 |
| C  | 7.48958  | 0.46790  | 0.40063  |
| C  | 6.10347  | 0.42188  | 0.59426  |
| H  | 5.35935  | -2.17745 | -1.46942 |
| H  | 7.79672  | -2.12959 | -1.78746 |
| H  | 9.19589  | -0.43081 | -0.59489 |
| H  | 8.08384  | 1.23902  | 0.90267  |
| H  | 5.64569  | 1.19034  | 1.22463  |
| H  | 2.07280  | -4.98651 | -0.44057 |
| H  | 4.33758  | -3.46576 | -0.10501 |

|   |          |          |          |
|---|----------|----------|----------|
| H | 3.12018  | 2.47894  | -3.58756 |
| H | 4.92864  | 1.08377  | -2.04820 |
| H | 2.75625  | 0.65168  | 4.64226  |
| H | 4.75640  | 0.03637  | 2.86285  |
| H | -0.61482 | 1.80051  | 1.76130  |
| H | -2.23921 | 0.53696  | -0.04699 |
| C | -3.67903 | 0.54997  | 0.02222  |
| C | -3.98057 | -0.07695 | 1.33096  |
| C | -3.95020 | -0.53237 | -0.95805 |
| C | -4.01885 | 0.43502  | 2.64515  |
| C | -4.27869 | -1.46629 | 1.15486  |
| C | -3.84690 | -0.59888 | -2.36650 |
| C | -4.27555 | -1.74611 | -0.26742 |
| C | -4.29780 | -0.40692 | 3.72682  |
| H | -3.82741 | 1.49062  | 2.84335  |
| C | -4.52454 | -2.31287 | 2.24625  |
| C | -4.12080 | -1.79218 | -3.04235 |
| H | -3.54166 | 0.26809  | -2.95066 |
| C | -4.52815 | -2.94478 | -0.95150 |
| C | -4.53242 | -1.78273 | 3.53945  |
| H | -4.32020 | 0.01298  | 4.73885  |
| H | -4.72474 | -3.37803 | 2.08222  |
| C | -4.46974 | -2.96630 | -2.34708 |
| H | -4.04646 | -1.81425 | -4.13556 |
| H | -4.77444 | -3.85464 | -0.39206 |
| H | -4.73127 | -2.42904 | 4.40098  |
| H | -4.67485 | -3.89139 | -2.89613 |
| C | -4.08152 | 2.03781  | -0.22499 |
| C | -3.90017 | 2.45122  | -1.69814 |
| H | -4.04409 | 3.54115  | -1.80287 |
| H | -2.88955 | 2.20851  | -2.05572 |
| H | -4.63219 | 1.95957  | -2.35659 |
| C | -3.21129 | 3.00385  | 0.61027  |
| H | -3.49833 | 4.05065  | 0.40390  |
| H | -3.31694 | 2.84663  | 1.69197  |
| H | -2.14751 | 2.88467  | 0.36055  |
| C | -5.56823 | 2.24611  | 0.14173  |
| H | -5.88926 | 3.28201  | -0.07556 |
| H | -6.20817 | 1.56046  | -0.44137 |
| H | -5.75295 | 2.05099  | 1.21066  |

**LiCo<sup>III</sup>O + 9-tBu-Fluorene (S=2)**

109

tbuflu\_ts\_u4.out Energy: -2209616.5155775

|   |         |          |          |
|---|---------|----------|----------|
| C | 1.39249 | -1.65498 | -0.28777 |
| N | 0.97818 | -2.94840 | -0.27095 |
| C | 2.07474 | -3.79668 | -0.19729 |
| C | 3.18378 | -2.99778 | -0.18193 |
| N | 2.75421 | -1.68489 | -0.26643 |
| B | 3.59808 | -0.35836 | -0.07828 |
| N | 3.12888 | 0.70979  | -1.15281 |
| C | 1.84681 | 1.14037  | -1.28296 |
| N | 1.85130 | 2.10511  | -2.23733 |
| C | 3.14340 | 2.28745  | -2.71652 |
| C | 3.93803 | 1.40930  | -2.03486 |
| N | 3.14538 | 0.15814  | 1.34607  |

|    |          |          |          |
|----|----------|----------|----------|
| C  | 1.86138  | 0.54967  | 1.58240  |
| N  | 1.77482  | 0.79100  | 2.91799  |
| C  | 2.99040  | 0.50410  | 3.53229  |
| C  | 3.83829  | 0.09493  | 2.54470  |
| Co | 0.53483  | 0.21571  | -0.03168 |
| O  | -1.12776 | 0.58265  | 0.37327  |
| C  | -0.46315 | -3.35404 | -0.25959 |
| C  | -0.57532 | -4.87584 | -0.41348 |
| C  | -1.07551 | -2.91417 | 1.07821  |
| C  | -1.16984 | -2.66535 | -1.43655 |
| C  | 0.63595  | 2.89686  | -2.60394 |
| C  | 0.96484  | 3.84364  | -3.76394 |
| C  | -0.47852 | 1.92587  | -3.02483 |
| C  | 0.21010  | 3.70399  | -1.36523 |
| C  | 0.53782  | 1.28152  | 3.60736  |
| C  | 0.03831  | 2.53151  | 2.86428  |
| C  | -0.52076 | 0.16706  | 3.57224  |
| C  | 0.86690  | 1.64470  | 5.06147  |
| H  | -1.64266 | -5.14609 | -0.43883 |
| H  | -0.11286 | -5.22841 | -1.35070 |
| H  | -0.52454 | -3.36233 | 1.92270  |
| H  | -2.12789 | -3.22988 | 1.13520  |
| H  | -1.05106 | -1.81901 | 1.17149  |
| H  | -0.66246 | -2.90010 | -2.38727 |
| H  | -1.19338 | -1.57362 | -1.30165 |
| H  | -2.21232 | -3.00922 | -1.49864 |
| H  | 1.29977  | 3.29114  | -4.65758 |
| H  | 1.73781  | 4.57975  | -3.48852 |
| H  | 0.05515  | 4.40267  | -4.03370 |
| H  | -0.14429 | 1.27967  | -3.85340 |
| H  | -1.35706 | 2.49927  | -3.36171 |
| H  | 1.02048  | 4.38030  | -1.04523 |
| H  | -0.68270 | 4.30802  | -1.59455 |
| H  | -0.03530 | 3.02555  | -0.53311 |
| H  | -0.85264 | 2.93421  | 3.37335  |
| H  | 0.81742  | 3.31243  | 2.85115  |
| H  | -1.41290 | 0.48467  | 4.13763  |
| H  | -0.82648 | -0.03595 | 2.53550  |
| H  | 1.65328  | 2.41539  | 5.12382  |
| H  | 1.18125  | 0.76517  | 5.64733  |
| H  | -0.04077 | 2.04965  | 5.53600  |
| H  | -0.11876 | -5.41247 | 0.43455  |
| H  | -0.12924 | -0.75593 | 4.03274  |
| H  | -0.79078 | 1.29317  | -2.18045 |
| C  | 5.19402  | -0.54475 | -0.26918 |
| C  | 5.71348  | -1.42364 | -1.24400 |
| C  | 7.08216  | -1.48994 | -1.53338 |
| C  | 7.98328  | -0.65633 | -0.86092 |
| C  | 7.49436  | 0.25492  | 0.08209  |
| C  | 6.12281  | 0.31033  | 0.36129  |
| H  | 5.03337  | -2.05935 | -1.81949 |
| H  | 7.44415  | -2.18925 | -2.29495 |
| H  | 9.05488  | -0.70490 | -1.08189 |
| H  | 8.18216  | 0.93455  | 0.59697  |
| H  | 5.77178  | 1.06531  | 1.07117  |
| H  | 1.99857  | -4.87931 | -0.16781 |
| H  | 4.23190  | -3.27567 | -0.11172 |
| H  | 3.40373  | 3.00269  | -3.49084 |
| H  | 5.00738  | 1.23463  | -2.11806 |

|   |          |          |          |
|---|----------|----------|----------|
| H | 3.16868  | 0.61262  | 4.59752  |
| H | 4.87019  | -0.23782 | 2.61627  |
| H | -0.24276 | 2.27591  | 1.83254  |
| H | -2.29798 | 0.36435  | 0.11429  |
| C | -3.64528 | 0.27326  | -0.03760 |
| C | -4.01544 | -0.85449 | 0.87126  |
| C | -3.92271 | -0.27379 | -1.40039 |
| C | -3.86809 | -1.01803 | 2.25968  |
| C | -4.50224 | -1.95713 | 0.11084  |
| C | -3.69455 | 0.25288  | -2.68337 |
| C | -4.45232 | -1.59338 | -1.30022 |
| C | -4.24414 | -2.22322 | 2.86669  |
| H | -3.42929 | -0.23149 | 2.87238  |
| C | -4.87482 | -3.16249 | 0.71913  |
| C | -4.00987 | -0.50362 | -3.82021 |
| H | -3.24934 | 1.23816  | -2.81260 |
| C | -4.77205 | -2.34588 | -2.43675 |
| C | -4.75530 | -3.29001 | 2.10777  |
| H | -4.12178 | -2.33880 | 3.94908  |
| H | -5.24365 | -3.99769 | 0.11381  |
| C | -4.55356 | -1.79409 | -3.70411 |
| H | -3.82168 | -0.08153 | -4.81337 |
| H | -5.17526 | -3.35929 | -2.33408 |
| H | -5.03986 | -4.22578 | 2.60017  |
| H | -4.79454 | -2.37030 | -4.60360 |
| C | -4.09806 | 1.72884  | 0.30684  |
| C | -3.71079 | 2.11252  | 1.75027  |
| H | -2.64597 | 1.90694  | 1.93664  |
| H | -3.89050 | 3.18991  | 1.91075  |
| H | -4.31361 | 1.57265  | 2.49565  |
| C | -3.43124 | 2.75623  | -0.63158 |
| H | -3.62816 | 3.78078  | -0.27053 |
| H | -2.34302 | 2.60061  | -0.65953 |
| H | -3.82323 | 2.70017  | -1.65768 |
| C | -5.63167 | 1.82844  | 0.15996  |
| H | -6.13778 | 1.11482  | 0.83309  |
| H | -5.98321 | 2.84564  | 0.41232  |
| H | -5.94611 | 1.60451  | -0.87369 |

**L<sub>1</sub>Co<sup>III</sup>O + Xanthene (S=0, closed-shell)**

98

xanthene\_ts\_u0\_closed.out Energy: -2158169.6209325

|   |         |          |          |
|---|---------|----------|----------|
| C | 1.30370 | 1.21610  | -0.80574 |
| N | 0.90339 | 2.25524  | -1.59833 |
| C | 1.99877 | 2.73270  | -2.31241 |
| C | 3.07746 | 1.98359  | -1.93741 |
| N | 2.63937 | 1.07746  | -0.99139 |
| B | 3.33239 | -0.12519 | -0.25838 |
| N | 2.86929 | -0.01922 | 1.23361  |
| C | 1.55577 | 0.05441  | 1.54282  |
| N | 1.47253 | 0.15593  | 2.90577  |
| C | 2.76363 | 0.13570  | 3.43395  |
| C | 3.62864 | 0.02576  | 2.38537  |
| N | 2.57233 | -1.36970 | -0.85057 |
| C | 1.22208 | -1.47015 | -0.71293 |
| N | 0.83960 | -2.57280 | -1.43461 |

|    |          |          |          |
|----|----------|----------|----------|
| C  | 1.96222  | -3.12544 | -2.04346 |
| C  | 3.03487  | -2.36555 | -1.68383 |
| Co | 0.25245  | -0.07057 | 0.19149  |
| O  | -1.36854 | -0.55481 | 0.52419  |
| C  | -0.49171 | 2.80561  | -1.66838 |
| C  | -0.51545 | 4.05061  | -2.56451 |
| C  | -1.42181 | 1.73408  | -2.25721 |
| C  | -0.92708 | 3.19514  | -0.24879 |
| C  | 0.21642  | 0.22646  | 3.72969  |
| C  | 0.57892  | 0.49881  | 5.19700  |
| C  | -0.66018 | 1.37788  | 3.21360  |
| C  | -0.51337 | -1.12276 | 3.62173  |
| C  | -0.54630 | -3.15628 | -1.56718 |
| C  | -1.04394 | -3.55082 | -0.16858 |
| C  | -1.46478 | -2.12298 | -2.23509 |
| C  | -0.49744 | -4.41313 | -2.45028 |
| H  | -1.54082 | 4.45224  | -2.56814 |
| H  | 0.15414  | 4.84192  | -2.18908 |
| H  | -1.04408 | 1.38382  | -3.23227 |
| H  | -2.43219 | 2.14776  | -2.39384 |
| H  | -1.51409 | 0.87490  | -1.57837 |
| H  | -0.24123 | 3.94665  | 0.17694  |
| H  | -0.94248 | 2.31926  | 0.41462  |
| H  | -1.94682 | 3.60707  | -0.26539 |
| H  | 1.12966  | 1.44659  | 5.31616  |
| H  | 1.16959  | -0.31941 | 5.63986  |
| H  | -0.35541 | 0.57803  | 5.77420  |
| H  | -0.09753 | 2.32600  | 3.20449  |
| H  | -1.53435 | 1.49707  | 3.87329  |
| H  | 0.12833  | -1.93822 | 3.99643  |
| H  | -1.43326 | -1.09598 | 4.22945  |
| H  | -0.79430 | -1.32379 | 2.57803  |
| H  | -2.04967 | -3.99361 | -0.25156 |
| H  | -0.36378 | -4.29253 | 0.28468  |
| H  | -2.46796 | -2.55659 | -2.37454 |
| H  | -1.57646 | -1.23754 | -1.59911 |
| H  | 0.14000  | -5.20339 | -2.02052 |
| H  | -0.15825 | -4.19240 | -3.47592 |
| H  | -1.52040 | -4.81458 | -2.52025 |
| H  | -0.24598 | 3.81578  | -3.60745 |
| H  | -1.06357 | -1.82926 | -3.22017 |
| H  | -1.03591 | 1.16961  | 2.20359  |
| C  | 4.94008  | -0.18565 | -0.30200 |
| C  | 5.72615  | 0.98432  | -0.35778 |
| C  | 7.12306  | 0.94528  | -0.25904 |
| C  | 7.78091  | -0.27704 | -0.08181 |
| C  | 7.02494  | -1.45101 | 0.01813  |
| C  | 5.62931  | -1.39807 | -0.08270 |
| H  | 5.24381  | 1.96155  | -0.45190 |
| H  | 7.69829  | 1.87602  | -0.31162 |
| H  | 8.87287  | -0.31296 | -0.00589 |
| H  | 7.52276  | -2.41249 | 0.18437  |
| H  | 5.06655  | -2.32892 | 0.03943  |
| H  | 1.93887  | 3.55486  | -3.01804 |
| H  | 4.10618  | 2.02931  | -2.28443 |
| H  | 2.97121  | 0.20304  | 4.49624  |
| H  | 4.71484  | -0.02043 | 2.36951  |
| H  | 1.92536  | -4.00476 | -2.67641 |
| H  | 4.07899  | -2.45885 | -1.96939 |

|   |          |          |          |
|---|----------|----------|----------|
| H | -1.12118 | -2.66096 | 0.47081  |
| H | -2.41278 | -0.30499 | 0.92686  |
| C | -3.79451 | -0.02952 | 1.27384  |
| C | -4.06792 | 1.37335  | 0.96221  |
| C | -4.36913 | -1.00033 | 0.34258  |
| H | -3.82448 | -0.30188 | 2.33894  |
| C | -4.42768 | 1.71742  | -0.36391 |
| C | -3.96351 | 2.43425  | 1.88503  |
| C | -4.67964 | -0.57572 | -0.97256 |
| C | -4.52484 | -2.37301 | 0.62069  |
| C | -4.66773 | 3.03541  | -0.74971 |
| C | -4.19064 | 3.76403  | 1.50869  |
| H | -3.69308 | 2.19815  | 2.91974  |
| C | -5.11841 | -1.46286 | -1.95325 |
| C | -4.95151 | -3.27813 | -0.35948 |
| H | -4.28116 | -2.73062 | 1.62745  |
| C | -4.54340 | 4.07211  | 0.18910  |
| H | -4.95001 | 3.23401  | -1.78823 |
| H | -4.09196 | 4.56240  | 2.25186  |
| H | -5.34394 | -1.07177 | -2.95016 |
| C | -5.24633 | -2.82834 | -1.65222 |
| H | -5.04954 | -4.34042 | -0.11152 |
| H | -4.72213 | 5.10823  | -0.11479 |
| H | -5.57889 | -3.52855 | -2.42498 |
| O | -4.53369 | 0.74792  | -1.34114 |

#### L<sub>1</sub>Co<sup>III</sup>O + Xanthene (S=1)

98

xanthene\_ts\_u2.out Energy: -2158166.8584789

|    |          |          |          |
|----|----------|----------|----------|
| C  | -1.16819 | -1.38959 | -0.80545 |
| N  | -0.80331 | -2.37283 | -1.66989 |
| C  | -1.90850 | -2.77375 | -2.41534 |
| C  | -2.96737 | -2.02954 | -1.97934 |
| N  | -2.50946 | -1.20320 | -0.96618 |
| B  | -3.26960 | -0.03726 | -0.20614 |
| N  | -2.83346 | -0.10895 | 1.30571  |
| C  | -1.53046 | -0.05858 | 1.66410  |
| N  | -1.47720 | -0.14670 | 3.01686  |
| C  | -2.77559 | -0.25577 | 3.51987  |
| C  | -3.61707 | -0.23107 | 2.44438  |
| N  | -2.64260 | 1.28895  | -0.80820 |
| C  | -1.32662 | 1.59411  | -0.62180 |
| N  | -1.07491 | 2.70795  | -1.35965 |
| C  | -2.22391 | 3.07818  | -2.05322 |
| C  | -3.19449 | 2.17973  | -1.71403 |
| Co | -0.25536 | 0.10066  | 0.20496  |
| O  | 1.45535  | 0.20886  | -0.00119 |
| C  | 0.59525  | -2.89651 | -1.81754 |
| C  | 0.56813  | -4.21122 | -2.60848 |
| C  | 1.43483  | -1.84540 | -2.56205 |
| C  | 1.17467  | -3.15141 | -0.41836 |
| C  | -0.19737 | -0.13741 | 3.79267  |
| C  | -0.50335 | -0.23383 | 5.29149  |
| C  | 0.64983  | -1.34257 | 3.34947  |
| C  | 0.54792  | 1.17441  | 3.49152  |
| C  | 0.26238  | 3.38215  | -1.45524 |

|   |          |          |          |
|---|----------|----------|----------|
| C | 0.84137  | 3.53171  | -0.03976 |
| C | 1.18473  | 2.51214  | -2.32535 |
| C | 0.09116  | 4.77017  | -2.08724 |
| H | 1.59191  | -4.61518 | -2.65037 |
| H | -0.07623 | -4.96435 | -2.12441 |
| H | 1.00997  | -1.64247 | -3.56020 |
| H | 2.46717  | -2.21320 | -2.68575 |
| H | 1.47467  | -0.91581 | -1.97464 |
| H | 0.53030  | -3.84063 | 0.15322  |
| H | 1.28295  | -2.20749 | 0.13281  |
| H | 2.17758  | -3.59626 | -0.50861 |
| H | -1.02653 | -1.17121 | 5.54270  |
| H | -1.11000 | 0.61841  | 5.63967  |
| H | 0.44613  | -0.22041 | 5.84921  |
| H | 0.09904  | -2.28607 | 3.49851  |
| H | 1.58017  | -1.38222 | 3.93927  |
| H | -0.07410 | 2.04721  | 3.75064  |
| H | 1.47943  | 1.21860  | 4.07960  |
| H | 0.81717  | 1.23354  | 2.42514  |
| H | 1.79197  | 4.08572  | -0.09139 |
| H | 0.14217  | 4.08101  | 0.61309  |
| H | 2.17739  | 2.98606  | -2.40914 |
| H | 1.31703  | 1.52559  | -1.85640 |
| H | -0.61311 | 5.39537  | -1.51291 |
| H | -0.25363 | 4.71309  | -3.13276 |
| H | 1.06961  | 5.27576  | -2.09268 |
| H | 0.22929  | -4.06684 | -3.64765 |
| H | 0.76384  | 2.39247  | -3.33851 |
| H | 0.92562  | -1.25752 | 2.28665  |
| C | -4.88112 | -0.12054 | -0.25184 |
| C | -5.55363 | -1.36112 | -0.24031 |
| C | -6.94682 | -1.45015 | -0.12605 |
| C | -7.71701 | -0.28813 | -0.00125 |
| C | -7.07519 | 0.95537  | 0.03003  |
| C | -5.68125 | 1.02986  | -0.08509 |
| H | -4.97909 | -2.29087 | -0.29625 |
| H | -7.43121 | -2.43274 | -0.12538 |
| H | -8.80686 | -0.35199 | 0.08657  |
| H | -7.66100 | 1.87274  | 0.15398  |
| H | -5.20865 | 2.01460  | -0.01666 |
| H | -1.86968 | -3.54653 | -3.17697 |
| H | -4.00018 | -2.03172 | -2.31829 |
| H | -3.00143 | -0.33970 | 4.57850  |
| H | -4.70209 | -0.28992 | 2.40304  |
| H | -2.27415 | 3.93746  | -2.71480 |
| H | -4.22534 | 2.11495  | -2.05270 |
| H | 1.05674  | 2.54509  | 0.39391  |
| H | 2.47103  | 0.15184  | 0.69366  |
| C | 3.69204  | 0.13442  | 1.20448  |
| C | 4.15172  | -1.22535 | 0.88377  |
| C | 4.28075  | 1.19612  | 0.37339  |
| H | 3.57843  | 0.36522  | 2.27319  |
| C | 4.65149  | -1.47534 | -0.41415 |
| C | 4.03889  | -2.32328 | 1.75635  |
| C | 4.75396  | 0.85200  | -0.91293 |
| C | 4.27278  | 2.55918  | 0.71853  |
| C | 5.01161  | -2.75910 | -0.82913 |
| C | 4.39736  | -3.61421 | 1.35472  |
| H | 3.65018  | -2.14993 | 2.76523  |

|   |         |          |          |
|---|---------|----------|----------|
| C | 5.18382 | 1.82176  | -1.82113 |
| C | 4.69991 | 3.54137  | -0.18147 |
| H | 3.89689 | 2.84503  | 1.70699  |
| C | 4.88010 | -3.83537 | 0.05742  |
| H | 5.39323 | -2.89506 | -1.84535 |
| H | 4.29366 | -4.45090 | 2.05292  |
| H | 5.53747 | 1.50030  | -2.80525 |
| C | 5.14916 | 3.17412  | -1.45749 |
| H | 4.67350 | 4.59635  | 0.10969  |
| H | 5.15727 | -4.84320 | -0.26728 |
| H | 5.47899 | 3.93647  | -2.17029 |
| O | 4.79403 | -0.45915 | -1.33152 |

**L<sub>1</sub>Co<sup>III</sup>O + Xanthene (S=2)**

98  
xanthene\_ts\_u4.out                      Energy: -2158164.0927623

|    |          |          |          |
|----|----------|----------|----------|
| C  | 1.49246  | -0.24112 | -1.83060 |
| N  | 1.44477  | -0.48842 | -3.16471 |
| C  | 2.73500  | -0.63138 | -3.66243 |
| C  | 3.58171  | -0.45189 | -2.60373 |
| N  | 2.80830  | -0.18346 | -1.48686 |
| B  | 3.24852  | -0.07935 | 0.03983  |
| N  | 2.46615  | 1.13029  | 0.70814  |
| C  | 1.11143  | 1.24017  | 0.71231  |
| N  | 0.80971  | 2.40779  | 1.32984  |
| C  | 1.98034  | 3.04553  | 1.72663  |
| C  | 3.01366  | 2.23992  | 1.33563  |
| N  | 2.70667  | -1.42280 | 0.67122  |
| C  | 1.37016  | -1.68652 | 0.72909  |
| N  | 1.24938  | -2.94850 | 1.22056  |
| C  | 2.51100  | -3.50004 | 1.42724  |
| C  | 3.41742  | -2.54502 | 1.06834  |
| Co | 0.17397  | -0.26737 | -0.25794 |
| O  | -1.50689 | -0.74508 | -0.25014 |
| C  | 0.16607  | -0.65271 | -3.92857 |
| C  | 0.47345  | -0.74063 | -5.42863 |
| C  | -0.52332 | -1.94203 | -3.45017 |
| C  | -0.73635 | 0.56376  | -3.65490 |
| C  | -0.59152 | 2.92647  | 1.43416  |
| C  | -0.59727 | 4.24911  | 2.20851  |
| C  | -1.11467 | 3.15115  | 0.00596  |
| C  | -1.45596 | 1.88626  | 2.16614  |
| C  | -0.06250 | -3.62782 | 1.47902  |
| C  | -0.92281 | -2.70313 | 2.35648  |
| C  | -0.75277 | -3.88861 | 0.13000  |
| C  | 0.17893  | -4.95538 | 2.20928  |
| H  | -0.47567 | -0.81918 | -5.98154 |
| H  | 1.00290  | 0.15709  | -5.78914 |
| H  | 0.14289  | -2.81185 | -3.57792 |
| H  | -1.44024 | -2.11535 | -4.03810 |
| H  | -0.80587 | -1.85364 | -2.38948 |
| H  | -0.21770 | 1.50411  | -3.90490 |
| H  | -1.04712 | 0.59699  | -2.59953 |
| H  | -1.64730 | 0.49189  | -4.27194 |
| H  | -0.01487 | 5.03100  | 1.69338  |
| H  | -0.20248 | 4.12498  | 3.23075  |



|   |          |          |          |
|---|----------|----------|----------|
| H | -1.63644 | 4.60502  | 2.28876  |
| H | -0.44735 | 3.83034  | -0.55088 |
| H | -2.12269 | 3.58935  | 0.03387  |
| H | -1.04521 | 1.67470  | 3.16786  |
| H | -2.48341 | 2.26663  | 2.27896  |
| H | -1.50925 | 0.94673  | 1.59385  |
| H | -1.88732 | -3.19070 | 2.57646  |
| H | -0.41153 | -2.48722 | 3.31018  |
| H | -1.69561 | -4.43735 | 0.29474  |
| H | -0.99299 | -2.93262 | -0.35870 |
| H | 0.70580  | -4.80661 | 3.16669  |
| H | 0.75099  | -5.66967 | 1.59406  |
| H | -0.79662 | -5.41659 | 2.42989  |
| H | 1.07383  | -1.63193 | -5.67428 |
| H | -0.10625 | -4.49482 | -0.52750 |
| H | -1.18043 | 2.19516  | -0.53627 |
| C | 4.82530  | 0.20096  | 0.26868  |
| C | 5.56498  | 1.01769  | -0.61322 |
| C | 6.88756  | 1.39461  | -0.34711 |
| C | 7.51339  | 0.97609  | 0.83266  |
| C | 6.79238  | 0.20006  | 1.74750  |
| C | 5.47056  | -0.16927 | 1.46817  |
| H | 5.09377  | 1.40094  | -1.52341 |
| H | 7.42714  | 2.02683  | -1.06073 |
| H | 8.54786  | 1.26633  | 1.04519  |
| H | 7.25698  | -0.11189 | 2.68927  |
| H | 4.92347  | -0.73893 | 2.22548  |
| H | 2.96137  | -0.83751 | -4.70416 |
| H | 4.66687  | -0.50292 | -2.57591 |
| H | 2.00040  | 3.99824  | 2.24756  |
| H | 4.08472  | 2.37712  | 1.45979  |
| H | 2.67612  | -4.50279 | 1.80900  |
| H | 4.50307  | -2.59198 | 1.06401  |
| H | -1.13324 | -1.76267 | 1.82656  |
| H | -2.65336 | -0.27444 | -0.55683 |
| C | -3.91351 | -0.03599 | -0.74564 |
| C | -4.47484 | -0.66821 | 0.46463  |
| C | -4.16766 | 1.41167  | -0.85918 |
| H | -4.08156 | -0.60005 | -1.67678 |
| C | -4.83964 | 0.14001  | 1.56178  |
| C | -4.54612 | -2.06331 | 0.63592  |
| C | -4.59622 | 2.13301  | 0.27632  |
| C | -3.96193 | 2.13998  | -2.04643 |
| C | -5.24707 | -0.41232 | 2.77961  |
| C | -4.94977 | -2.63071 | 1.84788  |
| H | -4.25056 | -2.70575 | -0.20050 |
| C | -4.82112 | 3.51211  | 0.23116  |
| C | -4.17375 | 3.52040  | -2.10430 |
| H | -3.62101 | 1.59875  | -2.93553 |
| C | -5.29665 | -1.80302 | 2.92586  |
| H | -5.52062 | 0.26175  | 3.59671  |
| H | -4.98722 | -3.71942 | 1.95556  |
| H | -5.16036 | 4.01812  | 1.13971  |
| C | -4.60636 | 4.21009  | -0.96242 |
| H | -4.00113 | 4.06033  | -3.04066 |
| H | -5.61032 | -2.23754 | 3.88029  |
| H | -4.77565 | 5.29079  | -0.99767 |
| O | -4.80772 | 1.51457  | 1.48633  |

**LiCo<sup>III</sup>O + MeCN (S=2)**

80

|                         |          |                  |
|-------------------------|----------|------------------|
| mecn_anderson_ts_u4.out | Energy:  | -1879693.8950468 |
| C                       | 0.33526  | 1.57744          |
| N                       | 0.24386  | 2.64940          |
| C                       | 1.44811  | 2.83149          |
| C                       | 2.29300  | 1.85558          |
| N                       | 1.61033  | 1.10865          |
| B                       | 2.05979  | -0.24353         |
| N                       | 1.63700  | -0.18688         |
| C                       | 0.36869  | 0.04586          |
| N                       | 0.39536  | 0.03080          |
| C                       | 1.69185  | -0.21186         |
| C                       | 2.46390  | -0.34770         |
| N                       | 1.16630  | -1.33478         |
| C                       | -0.19165 | -1.30855         |
| N                       | -0.66156 | -2.25666         |
| C                       | 0.39895  | -2.85825         |
| C                       | 1.53904  | -2.26640         |
| Co                      | -0.96021 | 0.26959          |
| O                       | -2.61330 | 0.89114          |
| C                       | -0.99470 | 3.47383          |
| C                       | -0.67664 | 4.69833          |
| C                       | -2.05837 | 2.60461          |
| C                       | -1.47912 | 3.93550          |
| C                       | -0.82443 | 0.23002          |
| C                       | -0.43843 | 0.18250          |
| C                       | -1.43931 | 1.59797          |
| C                       | -1.81736 | -0.89921         |
| C                       | -2.11912 | -2.56429         |
| C                       | -2.69948 | -2.92981         |
| C                       | -2.81925 | -1.32194         |
| C                       | -2.28581 | -3.74747         |
| H                       | -1.58621 | 5.31326          |
| H                       | 0.11286  | 5.32443          |
| H                       | -1.67980 | 2.21932          |
| H                       | -2.96139 | 3.20637          |
| H                       | -2.34143 | 1.76250          |
| H                       | -0.69296 | 4.51712          |
| H                       | -1.75917 | 3.07149          |
| H                       | -2.36760 | 4.57840          |
| H                       | 0.27670  | 0.98013          |
| H                       | -0.00580 | -0.79187         |
| H                       | -1.34501 | 0.33287          |
| H                       | -0.70333 | 2.40475          |
| H                       | -2.30703 | 1.78708          |
| H                       | -1.36815 | -1.88627         |
| H                       | -2.72373 | -0.79271         |
| H                       | -2.11765 | -0.85387         |
| H                       | -3.76784 | -3.17578         |
| H                       | -2.16735 | -3.79424         |
| H                       | -3.88784 | -1.53634         |
| H                       | -2.75683 | -0.48105         |
| H                       | -1.78319 | -4.65483         |
| H                       | -1.90272 | -3.51543         |
| H                       | -3.35940 | -3.97248         |

|   |          |          |          |
|---|----------|----------|----------|
| H | -0.37219 | 4.41501  | -3.66982 |
| H | -2.36136 | -1.02424 | -3.39392 |
| H | -1.78584 | 1.62091  | 2.56979  |
| C | 3.64947  | -0.53670 | -0.23434 |
| C | 4.59328  | 0.50704  | -0.12584 |
| C | 5.96595  | 0.25887  | -0.00001 |
| C | 6.44132  | -1.05693 | 0.03947  |
| C | 5.52630  | -2.11403 | -0.02394 |
| C | 4.15630  | -1.85120 | -0.14928 |
| H | 4.25390  | 1.54720  | -0.10920 |
| H | 6.66561  | 1.09819  | 0.07747  |
| H | 7.51382  | -1.25667 | 0.13583  |
| H | 5.87841  | -3.14968 | 0.03471  |
| H | 3.46698  | -2.70106 | -0.15029 |
| H | 1.62159  | 3.62306  | -2.99257 |
| H | 3.31619  | 1.64300  | -2.12631 |
| H | 1.97234  | -0.27027 | 4.59765  |
| H | 3.52895  | -0.54515 | 2.34271  |
| H | 0.27989  | -3.64549 | -3.09066 |
| H | 2.57267  | -2.44163 | -2.16916 |
| H | -2.61573 | -2.08114 | 0.20841  |
| H | -3.55112 | 0.40631  | 0.68382  |
| C | -4.75535 | -0.26486 | 1.23255  |
| H | -5.28055 | 0.57406  | 1.71107  |
| H | -4.35502 | -0.99344 | 1.95072  |
| C | -5.44297 | -0.84619 | 0.14028  |
| N | -5.94915 | -1.31826 | -0.80606 |

**L<sub>1</sub>Co<sup>III</sup>O + THF (S=0, open-shell singlet)**

87

thf\_anderson\_ts\_u0\_open.out

Energy: -1942233.9957720

|    |          |          |          |
|----|----------|----------|----------|
| C  | 0.56092  | 1.61245  | -0.24553 |
| N  | 0.29121  | 2.87214  | -0.71727 |
| C  | 1.47098  | 3.48872  | -1.12553 |
| C  | 2.48161  | 2.60644  | -0.88213 |
| N  | 1.91874  | 1.47915  | -0.31705 |
| B  | 2.60321  | 0.10303  | 0.03664  |
| N  | 2.01004  | -0.34587 | 1.40853  |
| C  | 0.67114  | -0.48705 | 1.53564  |
| N  | 0.44151  | -0.88102 | 2.82837  |
| C  | 1.66243  | -0.97094 | 3.50154  |
| C  | 2.63661  | -0.63640 | 2.60683  |
| N  | 2.00293  | -0.88748 | -1.02507 |
| C  | 0.65843  | -1.10849 | -1.01746 |
| N  | 0.39877  | -1.89702 | -2.10864 |
| C  | 1.57713  | -2.11151 | -2.82021 |
| C  | 2.57163  | -1.46864 | -2.14259 |
| Co | -0.50230 | -0.05558 | 0.12731  |
| O  | -2.24005 | 0.31463  | -0.04833 |
| C  | -1.06622 | 3.50324  | -0.82279 |
| C  | -0.92078 | 4.99383  | -1.16643 |
| C  | -1.85052 | 2.79166  | -1.93734 |
| C  | -1.78140 | 3.36893  | 0.53090  |
| C  | -0.90830 | -1.12061 | 3.42856  |
| C  | -0.75328 | -1.66741 | 4.85402  |
| C  | -1.67192 | 0.21496  | 3.46448  |

|   |          |          |          |
|---|----------|----------|----------|
| C | -1.65997 | -2.15050 | 2.56877  |
| C | -0.95516 | -2.37870 | -2.53083 |
| C | -1.66876 | -2.98478 | -1.31381 |
| C | -1.74125 | -1.18426 | -3.09634 |
| C | -0.80766 | -3.45999 | -3.61133 |
| H | -1.92532 | 5.44513  | -1.18449 |
| H | -0.32209 | 5.53335  | -0.41344 |
| H | -1.30464 | 2.85573  | -2.89443 |
| H | -2.83532 | 3.27236  | -2.06714 |
| H | -2.01087 | 1.73978  | -1.65944 |
| H | -1.18244 | 3.83545  | 1.33184  |
| H | -1.95998 | 2.30972  | 0.76162  |
| H | -2.75675 | 3.88221  | 0.48207  |
| H | -0.25696 | -0.94476 | 5.52223  |
| H | -0.18964 | -2.61498 | 4.86965  |
| H | -1.75552 | -1.86457 | 5.26579  |
| H | -1.11311 | 0.96426  | 4.05019  |
| H | -2.65973 | 0.07035  | 3.93328  |
| H | -1.08292 | -3.08606 | 2.48285  |
| H | -2.63664 | -2.37796 | 3.02682  |
| H | -1.84562 | -1.75378 | 1.56011  |
| H | -2.67341 | -3.32532 | -1.60691 |
| H | -1.09404 | -3.83378 | -0.90722 |
| H | -2.73269 | -1.51852 | -3.43841 |
| H | -1.89170 | -0.42552 | -2.31518 |
| H | -0.18766 | -4.30309 | -3.26335 |
| H | -0.37745 | -3.06192 | -4.54487 |
| H | -1.80869 | -3.85109 | -3.85235 |
| H | -0.47260 | 5.15323  | -2.16096 |
| H | -1.19802 | -0.73638 | -3.94596 |
| H | -1.82802 | 0.59630  | 2.44348  |
| C | 4.21269  | 0.12759  | 0.16301  |
| C | 4.88830  | 1.24093  | 0.70766  |
| C | 6.26593  | 1.22485  | 0.96011  |
| C | 7.01644  | 0.07509  | 0.68727  |
| C | 6.36821  | -1.05823 | 0.18303  |
| C | 4.98947  | -1.02821 | -0.06384 |
| H | 4.32505  | 2.14287  | 0.96720  |
| H | 6.75320  | 2.11179  | 1.37986  |
| H | 8.09442  | 0.05766  | 0.88048  |
| H | 6.93626  | -1.97470 | -0.01115 |
| H | 4.50850  | -1.94441 | -0.41978 |
| H | 1.51412  | 4.48814  | -1.54564 |
| H | 3.54669  | 2.70345  | -1.07646 |
| H | 1.74844  | -1.26445 | 4.54267  |
| H | 3.71623  | -0.58589 | 2.72859  |
| H | 1.62705  | -2.69987 | -3.73079 |
| H | 3.62886  | -1.38398 | -2.38079 |
| H | -1.79607 | -2.23123 | -0.52610 |
| H | -3.15147 | -0.40356 | -0.13602 |
| C | -4.36610 | -1.07267 | -0.21400 |
| O | -4.60000 | -1.49307 | -1.52694 |
| C | -5.33894 | 0.04841  | 0.08699  |
| H | -4.29806 | -1.93403 | 0.46984  |
| C | -5.30271 | -0.46331 | -2.24447 |
| C | -5.39807 | 0.73362  | -1.28848 |
| H | -4.98005 | 0.71380  | 0.88907  |
| H | -6.33540 | -0.34136 | 0.38034  |
| H | -4.75477 | -0.23516 | -3.17572 |

|   |          |          |          |
|---|----------|----------|----------|
| H | -6.30209 | -0.85377 | -2.51890 |
| H | -4.51615 | 1.38404  | -1.40703 |
| H | -6.30734 | 1.33354  | -1.45199 |

**L<sub>1</sub>Co<sup>III</sup>O + THF (S=1)**

87

thf\_anderson\_ts\_u2.out Energy: -1942232.4503794

|    |          |          |          |
|----|----------|----------|----------|
| C  | 0.47816  | 1.52887  | -0.13387 |
| N  | 0.13209  | 2.75603  | -0.62739 |
| C  | 1.25798  | 3.38855  | -1.15060 |
| C  | 2.31159  | 2.54619  | -0.94848 |
| N  | 1.83025  | 1.42716  | -0.29464 |
| B  | 2.57526  | 0.08134  | 0.05730  |
| N  | 2.04351  | -0.35439 | 1.45711  |
| C  | 0.71237  | -0.48440 | 1.64630  |
| N  | 0.53398  | -0.88146 | 2.94237  |
| C  | 1.78322  | -1.00047 | 3.55783  |
| C  | 2.72031  | -0.66977 | 2.62277  |
| N  | 2.00141  | -0.96064 | -0.97829 |
| C  | 0.67660  | -1.29880 | -0.96467 |
| N  | 0.49029  | -2.10051 | -2.05765 |
| C  | 1.67776  | -2.21320 | -2.77576 |
| C  | 2.61447  | -1.48862 | -2.09939 |
| Co | -0.49108 | -0.16129 | 0.22980  |
| O  | -2.21557 | -0.22515 | -0.09401 |
| C  | -1.25759 | 3.30813  | -0.69527 |
| C  | -1.19376 | 4.82809  | -0.91175 |
| C  | -1.98670 | 2.63822  | -1.87162 |
| C  | -1.98415 | 3.01599  | 0.62701  |
| C  | -0.79498 | -1.14912 | 3.57402  |
| C  | -0.60033 | -1.55751 | 5.03980  |
| C  | -1.63881 | 0.13519  | 3.50449  |
| C  | -1.48232 | -2.29129 | 2.80571  |
| C  | -0.82309 | -2.66203 | -2.50514 |
| C  | -1.56388 | -3.23594 | -1.28794 |
| C  | -1.62102 | -1.51922 | -3.15236 |
| C  | -0.58754 | -3.78620 | -3.52514 |
| H  | -2.21725 | 5.23316  | -0.87371 |
| H  | -0.59986 | 5.32432  | -0.12591 |
| H  | -1.42663 | 2.78772  | -2.81037 |
| H  | -2.98677 | 3.08517  | -1.99291 |
| H  | -2.10506 | 1.56161  | -1.67829 |
| H  | -1.40699 | 3.39925  | 1.48512  |
| H  | -2.14909 | 1.93574  | 0.74460  |
| H  | -2.96790 | 3.51429  | 0.61812  |
| H  | -0.11201 | -0.76168 | 5.62612  |
| H  | -0.01004 | -2.48396 | 5.13279  |
| H  | -1.58886 | -1.74489 | 5.48764  |
| H  | -1.12203 | 0.96864  | 4.00899  |
| H  | -2.61060 | -0.02745 | 3.99932  |
| H  | -0.85118 | -3.19569 | 2.80779  |
| H  | -2.44708 | -2.53510 | 3.28077  |
| H  | -1.68143 | -1.99558 | 1.76387  |
| H  | -2.50579 | -3.70278 | -1.62111 |

|   |          |          |          |
|---|----------|----------|----------|
| H | -0.95071 | -4.00431 | -0.78727 |
| H | -2.61155 | -1.87009 | -3.48306 |
| H | -1.77245 | -0.71391 | -2.42146 |
| H | 0.05738  | -4.58021 | -3.11237 |
| H | -0.14121 | -3.41674 | -4.46273 |
| H | -1.55970 | -4.23529 | -3.78316 |
| H | -0.77506 | 5.09442  | -1.89589 |
| H | -1.07981 | -1.12176 | -4.02828 |
| H | -1.83469 | 0.41838  | 2.45903  |
| C | 4.18603  | 0.17447  | 0.13928  |
| C | 4.83305  | 1.33968  | 0.60296  |
| C | 6.21577  | 1.38509  | 0.82295  |
| C | 7.00028  | 0.24763  | 0.59932  |
| C | 6.38189  | -0.93461 | 0.17587  |
| C | 4.99827  | -0.96553 | -0.04042 |
| H | 4.24428  | 2.23559  | 0.82351  |
| H | 6.68046  | 2.31114  | 1.17906  |
| H | 8.08210  | 0.27806  | 0.76795  |
| H | 6.97777  | -1.84082 | 0.02095  |
| H | 4.54143  | -1.91542 | -0.33541 |
| H | 1.23440  | 4.37265  | -1.60779 |
| H | 3.35682  | 2.66641  | -1.22241 |
| H | 1.91094  | -1.30279 | 4.59220  |
| H | 3.80490  | -0.63406 | 2.69556  |
| H | 1.77480  | -2.79330 | -3.68806 |
| H | 3.66066  | -1.31486 | -2.33852 |
| H | -1.80695 | -2.43793 | -0.57364 |
| H | -3.19293 | -0.45462 | -0.73094 |
| C | -4.39337 | -0.69449 | -1.32110 |
| O | -4.48918 | 0.00065  | -2.53644 |
| C | -5.42140 | -0.11028 | -0.37048 |
| H | -4.39084 | -1.78463 | -1.49138 |
| C | -5.29147 | 1.17798  | -2.36079 |
| C | -5.45271 | 1.35026  | -0.84813 |
| H | -5.12761 | -0.21991 | 0.68647  |
| H | -6.41553 | -0.58500 | -0.49935 |
| H | -4.79362 | 2.02795  | -2.85751 |
| H | -6.27176 | 1.01854  | -2.85451 |
| H | -4.58616 | 1.89306  | -0.43480 |
| H | -6.37184 | 1.89306  | -0.57590 |

**L<sub>1</sub>Co<sup>III</sup>O + THF (S=2)**

87

thf\_anderson\_ts\_u4.out Energy: -1942235.3773659

|   |         |          |          |
|---|---------|----------|----------|
| C | 0.60791 | 1.77097  | -0.35122 |
| N | 0.47467 | 2.99474  | -0.93207 |
| C | 1.71991 | 3.47789  | -1.32506 |
| C | 2.63445 | 2.53278  | -0.96145 |
| N | 1.94701 | 1.50364  | -0.33609 |
| B | 2.49082 | 0.07811  | 0.07569  |
| N | 1.84698 | -0.32545 | 1.46912  |
| C | 0.50641 | -0.37004 | 1.69820  |
| N | 0.34334 | -0.76236 | 2.98731  |
| C | 1.58614 | -0.96815 | 3.58124  |
| C | 2.52206 | -0.69173 | 2.62583  |
| N | 1.90368 | -0.87702 | -1.05045 |

|    |          |          |          |
|----|----------|----------|----------|
| C  | 0.55784  | -1.03657 | -1.20216 |
| N  | 0.38316  | -1.78558 | -2.32287 |
| C  | 1.61463  | -2.06375 | -2.90654 |
| C  | 2.56023  | -1.47907 | -2.11208 |
| Co | -0.58896 | 0.10962  | 0.06892  |
| O  | -2.36332 | 0.49457  | -0.03155 |
| C  | -0.84229 | 3.66576  | -1.16737 |
| C  | -0.61178 | 5.10224  | -1.65534 |
| C  | -1.61007 | 2.86377  | -2.23189 |
| C  | -1.62258 | 3.68766  | 0.15726  |
| C  | -1.00126 | -0.98256 | 3.60447  |
| C  | -0.83872 | -1.35158 | 5.08359  |
| C  | -1.82529 | 0.30989  | 3.47217  |
| C  | -1.68909 | -2.13136 | 2.84686  |
| C  | -0.96168 | -2.23685 | -2.80321 |
| C  | -1.61586 | -3.05200 | -1.67595 |
| C  | -1.81003 | -0.99944 | -3.14091 |
| C  | -0.79926 | -3.11298 | -4.05120 |
| H  | -1.58935 | 5.59478  | -1.77748 |
| H  | -0.02455 | 5.69042  | -0.93023 |
| H  | -1.02499 | 2.79704  | -3.16525 |
| H  | -2.56896 | 3.36106  | -2.45714 |
| H  | -1.82540 | 1.85188  | -1.85663 |
| H  | -1.04312 | 4.20637  | 0.94004  |
| H  | -1.85224 | 2.66177  | 0.48344  |
| H  | -2.57502 | 4.22585  | 0.01469  |
| H  | -0.33267 | -0.55125 | 5.64880  |
| H  | -0.27598 | -2.29067 | 5.21433  |
| H  | -1.83697 | -1.49707 | 5.52562  |
| H  | -1.29918 | 1.15582  | 3.94605  |
| H  | -2.79896 | 0.18016  | 3.97406  |
| H  | -1.09339 | -3.05719 | 2.91383  |
| H  | -2.68798 | -2.32381 | 3.27244  |
| H  | -1.80994 | -1.86595 | 1.78549  |
| H  | -2.63446 | -3.35102 | -1.96558 |
| H  | -1.01705 | -3.95028 | -1.44808 |
| H  | -2.77216 | -1.31800 | -3.57303 |
| H  | -2.02798 | -0.41437 | -2.23493 |
| H  | -0.18539 | -4.00670 | -3.85000 |
| H  | -0.35128 | -2.55380 | -4.88956 |
| H  | -1.79529 | -3.45633 | -4.37227 |
| H  | -0.10294 | 5.13185  | -2.63306 |
| H  | -1.28630 | -0.36014 | -3.87181 |
| H  | -2.01243 | 0.54861  | 2.41256  |
| C  | 4.09701  | -0.00834 | 0.26222  |
| C  | 4.83624  | 1.07463  | 0.78417  |
| C  | 6.19792  | 0.96674  | 1.09445  |
| C  | 6.86727  | -0.24801 | 0.90631  |
| C  | 6.15223  | -1.35231 | 0.42851  |
| C  | 4.79082  | -1.22947 | 0.12274  |
| H  | 4.33539  | 2.02707  | 0.98320  |
| H  | 6.73541  | 1.83367  | 1.49419  |
| H  | 7.93236  | -0.33767 | 1.14542  |
| H  | 6.65349  | -2.31823 | 0.30209  |
| H  | 4.25355  | -2.12417 | -0.20654 |
| H  | 1.86990  | 4.43574  | -1.81369 |
| H  | 3.71121  | 2.52425  | -1.10853 |
| H  | 1.71784  | -1.28409 | 4.61177  |
| H  | 3.60650  | -0.72813 | 2.68854  |

|   |          |          |          |
|---|----------|----------|----------|
| H | 1.73519  | -2.64233 | -3.81744 |
| H | 3.63925  | -1.44728 | -2.23752 |
| H | -1.69691 | -2.44006 | -0.76537 |
| H | -3.18037 | -0.47247 | 0.05608  |
| C | -4.18504 | -1.27868 | 0.07568  |
| O | -4.48677 | -1.65485 | -1.23852 |
| C | -5.32136 | -0.39233 | 0.55282  |
| H | -3.91160 | -2.16080 | 0.67664  |
| C | -5.39144 | -0.69788 | -1.81673 |
| C | -5.62147 | 0.37777  | -0.74391 |
| H | -5.02630 | 0.25942  | 1.39059  |
| H | -6.19394 | -0.99676 | 0.87096  |
| H | -4.94707 | -0.29705 | -2.74525 |
| H | -6.32696 | -1.22692 | -2.08247 |
| H | -4.88227 | 1.18754  | -0.85699 |
| H | -6.63464 | 0.80780  | -0.78628 |

### Transition states for HAA by the $\text{LoCo}^{\text{III}}\text{O}$ oxidant

#### $\text{LoCo}^{\text{III}}\text{O} + \text{CHD}$ ( $S=0$ , closed-shell)

94

|               |                          |          |          |
|---------------|--------------------------|----------|----------|
| ts_chd_u0.out | Energy: -2046939.8072645 |          |          |
| C             | 0.55746                  | -1.04936 | -1.21502 |
| N             | 1.91419                  | -0.99370 | -1.01231 |
| B             | 2.58548                  | -0.11893 | 0.11954  |
| N             | 1.98273                  | 1.31184  | -0.11656 |
| C             | 0.63124                  | 1.52651  | -0.16341 |
| N             | 1.81177                  | -0.60102 | 1.40315  |
| C             | 0.44074                  | -0.54362 | 1.42001  |
| Co            | -0.55156                 | 0.06661  | -0.11835 |
| O             | -2.06403                 | 0.18424  | -0.98658 |
| C             | -0.90056                 | -2.56265 | -2.81487 |
| C             | -0.74019                 | -3.77885 | -3.74729 |
| C             | -1.83501                 | -2.98397 | -1.65538 |
| C             | -1.54921                 | -1.40950 | -3.61569 |
| C             | -0.78423                 | 3.71650  | -0.47415 |
| C             | -0.61684                 | 5.24228  | -0.34299 |
| C             | -1.40141                 | 3.38799  | -1.85434 |
| C             | -1.74882                 | 3.25306  | 0.64138  |
| C             | -1.31870                 | -1.17809 | 3.23957  |
| C             | -1.86633                 | 0.25824  | 3.41658  |
| C             | -2.18338                 | -1.93925 | 2.20752  |
| C             | -1.42918                 | -1.91655 | 4.58586  |
| H             | -1.74481                 | -4.09320 | -4.07454 |
| H             | -0.16609                 | -3.54788 | -4.65733 |
| H             | -1.38694                 | -3.80314 | -1.06622 |
| H             | -2.79781                 | -3.33826 | -2.06336 |
| H             | -2.04213                 | -2.13126 | -0.99638 |
| H             | -0.88757                 | -1.08409 | -4.43797 |
| H             | -1.76252                 | -0.56398 | -2.94249 |
| H             | -2.50088                 | -1.75490 | -4.05820 |
| H             | -0.05109                 | 5.68394  | -1.17674 |
| H             | -0.13709                 | 5.52758  | 0.60794  |
| H             | -1.61781                 | 5.70397  | -0.35713 |
| H             | -0.72344                 | 3.69322  | -2.67035 |
| H             | -2.35586                 | 3.92938  | -1.97799 |



|   |          |          |          |
|---|----------|----------|----------|
| H | -1.31933 | 3.43392  | 1.64122  |
| H | -2.70069 | 3.80494  | 0.56449  |
| H | -1.98110 | 2.18367  | 0.54291  |
| H | -2.92062 | 0.22783  | 3.73940  |
| H | -1.28091 | 0.81169  | 4.17103  |
| H | -3.21910 | -2.02526 | 2.57453  |
| H | -2.23135 | -1.40856 | 1.24492  |
| H | -0.90832 | -1.39300 | 5.40186  |
| H | -1.05225 | -2.95027 | 4.52499  |
| H | -2.49378 | -1.97235 | 4.86659  |
| H | -0.28007 | -4.64216 | -3.24010 |
| H | -1.78368 | -2.95213 | 2.02932  |
| H | -1.60268 | 2.30806  | -1.93090 |
| C | 4.18200  | -0.13626 | 0.08374  |
| C | 4.81478  | 0.23298  | -1.12424 |
| C | 6.20629  | 0.27553  | -1.24366 |
| C | 7.01394  | -0.05214 | -0.14558 |
| C | 6.41158  | -0.41714 | 1.06229  |
| C | 5.01371  | -0.45688 | 1.17316  |
| H | 4.20330  | 0.49390  | -1.99433 |
| H | 6.66485  | 0.56549  | -2.19548 |
| H | 8.10543  | -0.02108 | -0.23359 |
| H | 7.03158  | -0.67370 | 1.92850  |
| H | 4.56337  | -0.74552 | 2.12474  |
| H | -1.82390 | 0.81511  | 2.46836  |
| H | -3.04608 | 0.67717  | -0.78365 |
| C | -4.45333 | 1.20584  | -0.66846 |
| C | -5.18118 | 0.18248  | -1.53523 |
| C | -4.67274 | 1.16892  | 0.74395  |
| H | -4.29856 | 2.19533  | -1.12263 |
| C | -5.45350 | -1.09596 | -0.76743 |
| H | -4.58397 | -0.04082 | -2.44400 |
| H | -6.14887 | 0.58203  | -1.93748 |
| C | -5.14359 | 0.04301  | 1.38709  |
| H | -4.36160 | 2.03441  | 1.34376  |
| C | -5.46106 | -1.12711 | 0.59055  |
| H | -5.70936 | -1.99740 | -1.33914 |
| H | -5.21140 | -0.00169 | 2.47858  |
| H | -5.70436 | -2.06525 | 1.10697  |
| C | 0.50867  | 2.91680  | -0.33711 |
| C | 0.40173  | -2.04100 | -2.20344 |
| C | 0.09647  | -1.06167 | 2.67930  |
| N | 1.80863  | 3.37507  | -0.39989 |
| N | 1.68969  | -2.44992 | -2.49467 |
| N | 1.29801  | -1.37212 | 3.27994  |
| N | 2.69761  | 2.40670  | -0.26114 |
| N | 2.59693  | -1.82091 | -1.76989 |
| N | 2.33387  | -1.09837 | 2.50465  |
| C | 2.35888  | 4.71200  | -0.61594 |
| H | 2.00810  | 5.11695  | -1.57461 |
| H | 2.07392  | 5.38754  | 0.20071  |
| H | 3.45042  | 4.60271  | -0.64035 |
| C | 2.22410  | -3.41579 | -3.45485 |
| H | 1.87520  | -4.42980 | -3.22301 |
| H | 1.92870  | -3.14432 | -4.47644 |
| H | 3.31674  | -3.37301 | -3.36448 |
| C | 1.61486  | -1.92810 | 4.59412  |
| H | 1.26031  | -1.25815 | 5.38872  |
| H | 1.15918  | -2.91937 | 4.71336  |

|   |         |          |         |
|---|---------|----------|---------|
| H | 2.70717 | -2.01624 | 4.64845 |
|---|---------|----------|---------|

LoCo<sup>III</sup>O + CHD (S=1)

94

ts\_chd\_u2.out Energy: -2046936.4826001

|    |          |          |          |
|----|----------|----------|----------|
| C  | 0.55937  | -1.22542 | -1.44992 |
| N  | 1.88851  | -1.03765 | -1.15877 |
| B  | 2.46032  | -0.10362 | -0.01250 |
| N  | 1.88481  | 1.34661  | -0.29209 |
| C  | 0.54524  | 1.58272  | -0.48704 |
| N  | 1.66659  | -0.52803 | 1.29401  |
| C  | 0.29523  | -0.65703 | 1.32875  |
| Co | -0.63477 | -0.09779 | -0.38771 |
| O  | -2.26451 | -0.03987 | -1.04543 |
| C  | -0.68116 | -2.71637 | -3.18104 |
| C  | -0.41001 | -3.86719 | -4.16579 |
| C  | -1.64755 | -3.22581 | -2.08370 |
| C  | -1.35836 | -1.54684 | -3.93490 |
| C  | -0.85712 | 3.74990  | -0.61540 |
| C  | -0.70866 | 5.27938  | -0.67734 |
| C  | -1.57696 | 3.26427  | -1.89583 |
| C  | -1.72220 | 3.37371  | 0.61204  |
| C  | -1.35234 | -1.06942 | 3.31190  |
| C  | -1.87471 | 0.33300  | 3.70269  |
| C  | -2.29642 | -1.68957 | 2.25861  |
| C  | -1.35389 | -1.99330 | 4.54861  |
| H  | -1.37415 | -4.22161 | -4.56650 |
| H  | 0.20033  | -3.55361 | -5.02681 |
| H  | -1.18118 | -4.02838 | -1.48625 |
| H  | -2.56052 | -3.63220 | -2.55367 |
| H  | -1.94310 | -2.39957 | -1.41829 |
| H  | -0.68447 | -1.12672 | -4.70199 |
| H  | -1.64255 | -0.75652 | -3.22093 |
| H  | -2.27292 | -1.90558 | -4.44022 |
| H  | -0.10253 | 5.60237  | -1.53929 |
| H  | -0.27124 | 5.69898  | 0.24212  |
| H  | -1.70915 | 5.72815  | -0.79399 |
| H  | -0.97263 | 3.48180  | -2.79356 |
| H  | -2.54567 | 3.78466  | -1.99910 |
| H  | -1.23550 | 3.68106  | 1.55366  |
| H  | -2.70699 | 3.86905  | 0.55163  |
| H  | -1.88644 | 2.28485  | 0.64262  |
| H  | -2.88786 | 0.26002  | 4.13409  |
| H  | -1.21634 | 0.81380  | 4.44710  |
| H  | -3.29941 | -1.82680 | 2.69357  |
| H  | -2.41037 | -1.04790 | 1.37255  |
| H  | -0.87568 | -1.53754 | 5.42799  |
| H  | -0.85631 | -2.95494 | 4.33550  |
| H  | -2.39693 | -2.21124 | 4.83231  |
| H  | 0.07711  | -4.72717 | -3.67744 |
| H  | -1.92003 | -2.67170 | 1.92508  |
| H  | -1.76972 | 2.18042  | -1.84445 |
| C  | 4.05658  | -0.23465 | 0.05992  |
| C  | 4.89846  | 0.57169  | -0.73311 |
| C  | 6.28549  | 0.38195  | -0.76359 |
| C  | 6.87362  | -0.63446 | -0.00161 |

|   |          |          |          |
|---|----------|----------|----------|
| C | 6.05779  | -1.46139 | 0.77989  |
| C | 4.67212  | -1.26322 | 0.80290  |
| H | 4.46452  | 1.36899  | -1.34183 |
| H | 6.90978  | 1.03019  | -1.38865 |
| H | 7.95861  | -0.78475 | -0.02100 |
| H | 6.50237  | -2.26820 | 1.37322  |
| H | 4.05802  | -1.92766 | 1.41662  |
| H | -1.92851 | 0.98367  | 2.81463  |
| H | -3.29354 | 0.55826  | -0.57736 |
| C | -4.44790 | 1.09829  | -0.33912 |
| C | -5.41472 | 0.16563  | -1.06398 |
| C | -4.60607 | 1.18488  | 1.10716  |
| H | -4.30177 | 2.06652  | -0.84279 |
| C | -5.78173 | -1.03555 | -0.22709 |
| H | -4.97257 | -0.15274 | -2.02627 |
| H | -6.35573 | 0.69889  | -1.34194 |
| C | -5.18851 | 0.17478  | 1.81814  |
| H | -4.16757 | 2.03892  | 1.63642  |
| C | -5.69620 | -1.00118 | 1.12422  |
| H | -6.18878 | -1.91926 | -0.73346 |
| H | -5.23368 | 0.21230  | 2.91152  |
| H | -6.01517 | -1.86594 | 1.71832  |
| C | 0.45173  | 2.97616  | -0.49347 |
| C | 0.56024  | -2.16281 | -2.48631 |
| C | 0.02088  | -0.90243 | 2.67620  |
| N | 1.73516  | 3.43755  | -0.28966 |
| N | 1.89310  | -2.43031 | -2.72603 |
| N | 1.24131  | -0.85090 | 3.31837  |
| N | 2.60354  | 2.44803  | -0.16042 |
| N | 2.69440  | -1.75439 | -1.92214 |
| N | 2.23654  | -0.62432 | 2.48093  |
| C | 2.28107  | 4.78911  | -0.19004 |
| H | 2.08521  | 5.35243  | -1.11191 |
| H | 1.84066  | 5.31808  | 0.66596  |
| H | 3.36372  | 4.68894  | -0.04191 |
| C | 2.55273  | -3.29693 | -3.70043 |
| H | 2.26230  | -4.34424 | -3.54634 |
| H | 2.29502  | -2.98782 | -4.72240 |
| H | 3.63328  | -3.18704 | -3.54410 |
| C | 1.58983  | -0.98896 | 4.72881  |
| H | 0.99359  | -0.29123 | 5.33350  |
| H | 1.41586  | -2.01851 | 5.07197  |
| H | 2.65471  | -0.74205 | 4.82660  |

**LoCo<sup>III</sup>O + fluorene (S=0, closed-shell)**

103

ts\_fluorene\_u0.out Energy: -2215077.4727932

|    |          |          |          |
|----|----------|----------|----------|
| C  | -0.95040 | -0.73190 | -1.20359 |
| N  | -2.30838 | -0.66342 | -1.38033 |
| N  | -2.82695 | -0.67927 | 1.00482  |
| C  | -1.50657 | -0.64122 | 1.37813  |
| N  | -2.63865 | 1.46662  | -0.17316 |
| C  | -1.31978 | 1.66168  | 0.13465  |
| Co | -0.16997 | 0.18096  | 0.25306  |
| O  | 1.45921  | 0.54864  | -0.19249 |
| C  | 0.92238  | -2.03973 | -2.52577 |

|   |          |          |          |
|---|----------|----------|----------|
| C | 1.03792  | -3.14306 | -3.59559 |
| C | 1.77111  | -0.82597 | -2.97091 |
| C | 1.48770  | -2.61735 | -1.20663 |
| C | -0.24600 | -1.73327 | 3.40397  |
| C | -0.55692 | -1.87977 | 4.90934  |
| C | 0.35800  | -3.04893 | 2.85843  |
| C | 0.78833  | -0.59603 | 3.25119  |
| C | 0.07956  | 3.85275  | 0.55944  |
| C | 0.77412  | 3.20787  | 1.78311  |
| C | 1.01024  | 3.75580  | -0.67272 |
| C | -0.16065 | 5.33751  | 0.89509  |
| H | 2.09194  | -3.46232 | -3.64172 |
| H | 0.43912  | -4.03456 | -3.34712 |
| H | 1.38008  | -0.39855 | -3.91135 |
| H | 2.81338  | -1.14747 | -3.14446 |
| H | 1.77110  | -0.05911 | -2.17931 |
| H | 0.88957  | -3.48050 | -0.86547 |
| H | 1.50750  | -1.85690 | -0.41546 |
| H | 2.52717  | -2.95145 | -1.35550 |
| H | -1.11965 | -2.79411 | 5.14575  |
| H | -1.11680 | -1.01011 | 5.29334  |
| H | 0.39249  | -1.94034 | 5.46633  |
| H | -0.36214 | -3.88198 | 2.93127  |
| H | 1.25796  | -3.32549 | 3.43467  |
| H | 0.36394  | 0.37508  | 3.55489  |
| H | 1.66735  | -0.80336 | 3.88354  |
| H | 1.15225  | -0.49855 | 2.21573  |
| H | 1.69198  | 3.77067  | 2.02487  |
| H | 0.11541  | 3.22316  | 2.66835  |
| H | 1.94311  | 4.31462  | -0.48480 |
| H | 1.27197  | 2.70301  | -0.86480 |
| H | -0.85442 | 5.46775  | 1.74216  |
| H | -0.52949 | 5.91655  | 0.03568  |
| H | 0.80292  | 5.78469  | 1.18923  |
| H | 0.76550  | -2.79518 | -4.60347 |
| H | 0.52379  | 4.18706  | -1.56520 |
| H | 0.64796  | -2.93300 | 1.80106  |
| C | -5.11758 | 0.60232  | -2.02937 |
| C | -6.43945 | 0.71285  | -2.46899 |
| C | -7.49004 | 0.28965  | -1.64308 |
| C | -7.19957 | -0.23778 | -0.38096 |
| C | -5.87000 | -0.34506 | 0.05242  |
| H | -4.31264 | 0.94115  | -2.68977 |
| H | -6.65325 | 1.13135  | -3.45860 |
| H | -8.52801 | 0.37337  | -1.98302 |
| H | -8.01220 | -0.56912 | 0.27495  |
| H | -5.66551 | -0.76145 | 1.04079  |
| H | 1.06793  | 2.17159  | 1.57001  |
| H | 2.49540  | 0.55523  | 0.44498  |
| C | 3.72261  | 0.53311  | 1.07889  |
| C | 4.48694  | 1.35177  | 0.13654  |
| H | 3.49077  | 0.88614  | 2.09256  |
| C | 4.13856  | -0.84713 | 0.82114  |
| C | 4.55650  | 2.74539  | -0.03313 |
| C | 5.17488  | 0.49543  | -0.78352 |
| C | 3.80614  | -2.05250 | 1.46319  |
| C | 4.95817  | -0.88118 | -0.35389 |
| C | 5.28840  | 3.27289  | -1.10271 |
| H | 4.03511  | 3.41140  | 0.66321  |

|   |          |          |          |
|---|----------|----------|----------|
| C | 5.89220  | 1.03680  | -1.86165 |
| C | 4.27542  | -3.26325 | 0.94378  |
| H | 3.18072  | -2.04516 | 2.36042  |
| C | 5.40421  | -2.10435 | -0.87777 |
| C | 5.94850  | 2.42655  | -2.01799 |
| H | 5.34761  | 4.35936  | -1.23425 |
| H | 6.40874  | 0.37878  | -2.57016 |
| C | 5.06403  | -3.29469 | -0.22462 |
| H | 4.01822  | -4.20250 | 1.44657  |
| H | 6.02075  | -2.12698 | -1.78388 |
| H | 6.51018  | 2.86106  | -2.85202 |
| H | 5.41181  | -4.25487 | -0.62066 |
| B | -3.26235 | 0.03124  | -0.33329 |
| N | -2.44993 | 3.54298  | -0.03346 |
| N | -3.32298 | 2.58285  | -0.28267 |
| N | -3.58270 | -1.39248 | 1.81219  |
| N | -2.76167 | -1.82529 | 2.75210  |
| N | -2.73537 | -1.33127 | -2.42724 |
| N | -1.64971 | -1.86475 | -2.95879 |
| C | -1.46757 | -1.38582 | 2.56341  |
| C | -0.50312 | -1.55859 | -2.25164 |
| C | -1.18803 | 3.05675  | 0.24929  |
| C | -3.34109 | -2.67926 | 3.78490  |
| H | -2.76597 | -3.61195 | 3.86618  |
| H | -3.35107 | -2.16148 | 4.75406  |
| H | -4.36935 | -2.90795 | 3.47728  |
| C | -1.86717 | -2.62920 | -4.18694 |
| H | -1.27204 | -2.20801 | -5.00740 |
| H | -1.60725 | -3.68505 | -4.04101 |
| H | -2.93486 | -2.54193 | -4.42413 |
| C | -2.97087 | 4.90596  | -0.13311 |
| H | -2.90004 | 5.42145  | 0.83290  |
| H | -2.42050 | 5.46862  | -0.89877 |
| H | -4.02409 | 4.81760  | -0.42777 |
| C | -4.79817 | 0.06723  | -0.76178 |

#### Transition states for HAA by the $L_2Co^{III}O$ oxidant

##### $L_2Co^{III}O + CHD$ ( $S=0$ , closed-shell)

94

ts\_chd\_u0.out Energy: -2290045.2275054

|   |          |          |          |
|---|----------|----------|----------|
| C | 0.52801  | -1.11845 | -1.15324 |
| N | 0.08790  | -2.12440 | -1.97070 |
| C | 1.09985  | -3.07239 | -2.10510 |
| C | 2.20040  | -2.58818 | -1.41363 |
| N | 1.84547  | -1.36052 | -0.89270 |
| B | 2.53566  | -0.45651 | 0.20191  |
| N | 2.12395  | 1.02952  | -0.13469 |
| C | 0.82268  | 1.37177  | -0.33263 |
| N | 0.77546  | 2.70670  | -0.64844 |
| C | 2.07675  | 3.20417  | -0.62412 |
| C | 2.91749  | 2.14786  | -0.30972 |
| N | 1.71830  | -0.90854 | 1.48752  |
| C | 0.37252  | -0.68498 | 1.56852  |
| N | -0.08142 | -1.35385 | 2.68232  |
| C | 0.97631  | -2.07064 | 3.23526  |
| C | 2.09694  | -1.80328 | 2.46552  |

|    |          |          |          |
|----|----------|----------|----------|
| Co | -0.49540 | 0.09411  | -0.02552 |
| O  | -2.04755 | 0.58066  | 0.55535  |
| C  | -1.29167 | -2.24071 | -2.57741 |
| C  | -1.16920 | -2.71721 | -4.03532 |
| C  | -2.10047 | -3.22309 | -1.71724 |
| C  | -1.95447 | -0.86168 | -2.58637 |
| C  | -0.49834 | 3.50173  | -0.89326 |
| C  | -0.18776 | 4.87330  | -1.50482 |
| C  | -1.36601 | 2.72448  | -1.89252 |
| C  | -1.18825 | 3.68914  | 0.46652  |
| C  | -1.50511 | -1.29454 | 3.23774  |
| C  | -1.83272 | 0.18323  | 3.49710  |
| C  | -2.44823 | -1.96333 | 2.22617  |
| C  | -1.61386 | -2.04824 | 4.56933  |
| H  | -2.16772 | -2.68005 | -4.49759 |
| H  | -0.50026 | -2.05390 | -4.60802 |
| H  | -1.64123 | -4.22524 | -1.70878 |
| H  | -3.12085 | -3.31615 | -2.12234 |
| H  | -2.17257 | -2.85496 | -0.68097 |
| H  | -1.30988 | -0.11056 | -3.06669 |
| H  | -2.22179 | -0.52272 | -1.57485 |
| H  | -2.89132 | -0.92879 | -3.15952 |
| H  | 0.39866  | 4.79431  | -2.43409 |
| H  | 0.32281  | 5.54717  | -0.80322 |
| H  | -1.15010 | 5.34388  | -1.75896 |
| H  | -0.81964 | 2.55674  | -2.83486 |
| H  | -2.27238 | 3.31018  | -2.11205 |
| H  | -0.53588 | 4.25639  | 1.15108  |
| H  | -2.12101 | 4.25906  | 0.32707  |
| H  | -1.43633 | 2.71759  | 0.91474  |
| H  | -2.86007 | 0.25521  | 3.88979  |
| H  | -1.14061 | 0.59939  | 4.24874  |
| H  | -3.46753 | -1.97420 | 2.64306  |
| H  | -2.48573 | -1.40419 | 1.28440  |
| H  | -0.93219 | -1.65392 | 5.33885  |
| H  | -1.46584 | -3.13275 | 4.46237  |
| H  | -2.64032 | -1.89783 | 4.93816  |
| H  | -0.81121 | -3.75075 | -4.12717 |
| H  | -2.13530 | -3.00538 | 2.04403  |
| H  | -1.68899 | 1.76141  | -1.48503 |
| C  | 4.92625  | -0.74975 | -0.82230 |
| C  | 6.32072  | -0.70137 | -0.75311 |
| C  | 6.94951  | -0.41048 | 0.46296  |
| C  | 6.17513  | -0.14971 | 1.59882  |
| C  | 4.78202  | -0.19942 | 1.51742  |
| H  | 4.45851  | -0.94087 | -1.79339 |
| H  | 4.19839  | 0.04675  | 2.41070  |
| H  | -1.78867 | 0.75705  | 2.56339  |
| H  | -3.00938 | 1.13063  | 0.29973  |
| C  | -4.32380 | 1.67199  | -0.01255 |
| C  | -4.75587 | 0.96106  | -1.28193 |
| C  | -4.92600 | 1.23773  | 1.21711  |
| H  | -4.10576 | 2.74347  | -0.11489 |
| C  | -5.05632 | -0.49631 | -1.02998 |
| H  | -3.99839 | 1.07883  | -2.07726 |
| H  | -5.67276 | 1.44430  | -1.70425 |
| C  | -5.43562 | -0.03309 | 1.34439  |
| H  | -4.85935 | 1.88672  | 2.09891  |
| C  | -5.40634 | -0.93249 | 0.20668  |

|   |          |          |          |
|---|----------|----------|----------|
| H | -5.06123 | -1.18595 | -1.88177 |
| H | -5.80560 | -0.39447 | 2.30909  |
| H | -5.67023 | -1.98549 | 0.36098  |
| C | 2.55417  | 4.51984  | -0.85974 |
| N | 3.05388  | 5.55773  | -1.02699 |
| C | 4.32931  | 2.28887  | -0.22775 |
| N | 5.45437  | 2.58817  | -0.21088 |
| C | 3.40394  | -3.31146 | -1.19606 |
| N | 4.34023  | -3.98252 | -1.03227 |
| C | 1.02597  | -4.34382 | -2.72771 |
| N | 1.02014  | -5.41101 | -3.19353 |
| C | 3.33731  | -2.48233 | 2.61381  |
| N | 4.28560  | -3.13226 | 2.79401  |
| C | 1.01368  | -2.97407 | 4.33057  |
| N | 1.17176  | -3.73698 | 5.19534  |
| H | 6.65793  | 0.10456  | 2.54772  |
| H | 8.04222  | -0.37063 | 0.52112  |
| H | 6.91835  | -0.88145 | -1.65242 |
| C | 4.12401  | -0.53166 | 0.31559  |

#### L<sub>2</sub>Co<sup>III</sup>O + CHD (S=1)

94

ts\_chd\_u2.out Energy: -2290049.5412251

|    |          |          |          |
|----|----------|----------|----------|
| C  | 0.41895  | -1.03136 | -1.14543 |
| N  | -0.01086 | -2.05669 | -1.92614 |
| C  | 0.98174  | -3.03087 | -1.99625 |
| C  | 2.06331  | -2.54820 | -1.27486 |
| N  | 1.72005  | -1.28826 | -0.81394 |
| B  | 2.46816  | -0.37075 | 0.25421  |
| N  | 2.14653  | 1.15993  | -0.09920 |
| C  | 0.88613  | 1.65372  | -0.28814 |
| N  | 0.98357  | 2.95405  | -0.67296 |
| C  | 2.32974  | 3.30667  | -0.70909 |
| C  | 3.05564  | 2.17910  | -0.35465 |
| N  | 1.70435  | -0.80525 | 1.58850  |
| C  | 0.36804  | -0.55971 | 1.72597  |
| N  | -0.06889 | -1.25254 | 2.81396  |
| C  | 0.98376  | -1.99556 | 3.33683  |
| C  | 2.09158  | -1.73288 | 2.54223  |
| Co | -0.50821 | 0.32829  | 0.07712  |
| O  | -2.01867 | 1.10641  | 0.38773  |
| C  | -1.36492 | -2.14888 | -2.58656 |
| C  | -1.16639 | -2.49213 | -4.07341 |
| C  | -2.18208 | -3.22135 | -1.84951 |
| C  | -2.06639 | -0.79195 | -2.49250 |
| C  | -0.22104 | 3.82978  | -0.98945 |
| C  | 0.21727  | 5.17006  | -1.58841 |
| C  | -1.09116 | 3.08909  | -2.01863 |
| C  | -0.97669 | 4.07053  | 0.32547  |
| C  | -1.52524 | -1.25716 | 3.24448  |
| C  | -1.94908 | 0.19913  | 3.48164  |
| C  | -2.33481 | -1.90922 | 2.11263  |
| C  | -1.72030 | -2.05803 | 4.53506  |
| H  | -2.14941 | -2.49347 | -4.56979 |
| H  | -0.53216 | -1.73516 | -4.56348 |
| H  | -1.71459 | -4.21640 | -1.92167 |

|   |          |          |          |
|---|----------|----------|----------|
| H | -3.18847 | -3.28609 | -2.29259 |
| H | -2.29093 | -2.95446 | -0.78582 |
| H | -1.43623 | 0.01955  | -2.88723 |
| H | -2.35783 | -0.54009 | -1.46357 |
| H | -2.98705 | -0.83796 | -3.09339 |
| H | 0.81028  | 5.04627  | -2.50852 |
| H | 0.77485  | 5.79188  | -0.87318 |
| H | -0.69513 | 5.72508  | -1.85598 |
| H | -0.50184 | 2.82841  | -2.91344 |
| H | -1.91507 | 3.75253  | -2.32759 |
| H | -0.32292 | 4.56760  | 1.06187  |
| H | -1.83887 | 4.72927  | 0.12849  |
| H | -1.35373 | 3.11786  | 0.72668  |
| H | -3.00540 | 0.21418  | 3.79549  |
| H | -1.33957 | 0.65345  | 4.28075  |
| H | -3.38044 | -2.02620 | 2.43371  |
| H | -2.34288 | -1.27587 | 1.21502  |
| H | -1.11793 | -1.66265 | 5.36778  |
| H | -1.50816 | -3.12983 | 4.40549  |
| H | -2.77928 | -1.96758 | 4.82263  |
| H | -0.72077 | -3.48405 | -4.23134 |
| H | -1.92827 | -2.90333 | 1.86347  |
| H | -1.53602 | 2.18480  | -1.58424 |
| C | 4.80379  | -0.81622 | -0.85547 |
| C | 6.19912  | -0.86818 | -0.83089 |
| C | 6.88593  | -0.61308 | 0.36158  |
| C | 6.16954  | -0.28583 | 1.51789  |
| C | 4.77478  | -0.23535 | 1.48102  |
| H | 4.29223  | -0.98316 | -1.80902 |
| H | 4.23893  | 0.06054  | 2.38903  |
| H | -1.86471 | 0.78764  | 2.55708  |
| H | -3.34851 | 1.02549  | 0.38594  |
| C | -4.59355 | 1.16034  | 0.30405  |
| C | -5.02705 | 0.58968  | -1.04219 |
| C | -5.15219 | 0.48518  | 1.47651  |
| H | -4.65491 | 2.25950  | 0.34694  |
| C | -5.18744 | -0.90699 | -1.00815 |
| H | -4.32748 | 0.89931  | -1.83784 |
| H | -6.00770 | 1.03116  | -1.33801 |
| C | -5.55668 | -0.81594 | 1.40777  |
| H | -5.15805 | 1.01168  | 2.43797  |
| C | -5.46298 | -1.54888 | 0.15238  |
| H | -5.15174 | -1.46178 | -1.95244 |
| H | -5.91630 | -1.33606 | 2.30198  |
| H | -5.63181 | -2.63154 | 0.15956  |
| C | 2.93834  | 4.55051  | -1.02155 |
| N | 3.52986  | 5.52542  | -1.25518 |
| C | 4.47621  | 2.19986  | -0.30115 |
| N | 5.61809  | 2.42854  | -0.31615 |
| C | 3.22921  | -3.30659 | -0.98084 |
| N | 4.12045  | -4.01951 | -0.75417 |
| C | 0.89572  | -4.30616 | -2.60883 |
| N | 0.85678  | -5.36998 | -3.08075 |
| C | 3.32259  | -2.43210 | 2.67165  |
| N | 4.25903  | -3.10031 | 2.84802  |
| C | 1.01409  | -2.88232 | 4.44496  |
| N | 1.13831  | -3.62492 | 5.33262  |
| H | 6.69972  | -0.05879 | 2.44820  |
| H | 7.97995  | -0.65255 | 0.38509  |



|   |         |          |          |
|---|---------|----------|----------|
| H | 6.75309 | -1.09880 | -1.74642 |
| C | 4.05579 | -0.53192 | 0.30520  |

**L<sub>2</sub>Co<sup>III</sup>O + fluorene (S=0, closed-shell)**

103

ts\_fluorene\_u0.out Energy: -2458177.8667837

|    |          |          |          |
|----|----------|----------|----------|
| C  | 0.25022  | -1.11704 | -0.99903 |
| N  | -0.23392 | -2.13162 | -1.77449 |
| C  | 0.74258  | -3.12083 | -1.87743 |
| C  | 1.86109  | -2.65727 | -1.20181 |
| N  | 1.55544  | -1.39750 | -0.72931 |
| B  | 2.30588  | -0.44362 | 0.28355  |
| N  | 1.92906  | 1.02821  | -0.14258 |
| C  | 0.63442  | 1.41121  | -0.25902 |
| N  | 0.60299  | 2.72820  | -0.63665 |
| C  | 1.91929  | 3.16736  | -0.76438 |
| C  | 2.74563  | 2.09754  | -0.45705 |
| N  | 1.49892  | -0.76175 | 1.61399  |
| C  | 0.15603  | -0.52430 | 1.68126  |
| N  | -0.30569 | -1.09102 | 2.84649  |
| C  | 0.75649  | -1.73799 | 3.47062  |
| C  | 1.87727  | -1.55013 | 2.67819  |
| Co | -0.72456 | 0.18060  | 0.09939  |
| O  | -2.28482 | 0.69337  | 0.60026  |
| C  | -1.60206 | -2.22094 | -2.42062 |
| C  | -1.42268 | -2.62466 | -3.89538 |
| C  | -2.42695 | -3.25081 | -1.63377 |
| C  | -2.28392 | -0.85047 | -2.38870 |
| C  | -0.65945 | 3.57508  | -0.76555 |
| C  | -0.33924 | 4.96501  | -1.32657 |
| C  | -1.61467 | 2.87769  | -1.74559 |
| C  | -1.24604 | 3.72620  | 0.64624  |
| C  | -1.75517 | -1.07898 | 3.34513  |
| C  | -2.17646 | 0.38471  | 3.53404  |
| C  | -2.60456 | -1.85214 | 2.32666  |
| C  | -1.88675 | -1.78576 | 4.70005  |
| H  | -2.40842 | -2.60236 | -4.38523 |
| H  | -0.76286 | -1.91057 | -4.41495 |
| H  | -1.95877 | -4.24798 | -1.64833 |
| H  | -3.42721 | -3.34210 | -2.08608 |
| H  | -2.54888 | -2.92905 | -0.58689 |
| H  | -1.64305 | -0.07071 | -2.82903 |
| H  | -2.57439 | -0.54813 | -1.37456 |
| H  | -3.20710 | -0.90951 | -2.98575 |
| H  | 0.13696  | 4.92096  | -2.31838 |
| H  | 0.27835  | 5.56670  | -0.64468 |
| H  | -1.29714 | 5.49474  | -1.44410 |
| H  | -1.13135 | 2.73964  | -2.72648 |
| H  | -2.50646 | 3.50931  | -1.88245 |
| H  | -0.51335 | 4.21301  | 1.31142  |
| H  | -2.14671 | 4.35648  | 0.60231  |
| H  | -1.53644 | 2.75302  | 1.06222  |
| H  | -3.23518 | 0.41157  | 3.83878  |
| H  | -1.56903 | 0.85584  | 4.32513  |
| H  | -3.64561 | -1.89108 | 2.67952  |
| H  | -2.61608 | -1.36240 | 1.34883  |

|   |          |          |          |
|---|----------|----------|----------|
| H | -1.28407 | -1.31287 | 5.49023  |
| H | -1.65909 | -2.86067 | 4.64876  |
| H | -2.94243 | -1.69428 | 4.99924  |
| H | -1.02159 | -3.63860 | -4.02446 |
| H | -2.23100 | -2.88513 | 2.22618  |
| H | -1.96050 | 1.91012  | -1.36759 |
| C | 4.67545  | -0.92461 | -0.73634 |
| C | 6.07147  | -0.90184 | -0.68540 |
| C | 6.72135  | -0.48313 | 0.48108  |
| C | 5.96677  | -0.06807 | 1.58384  |
| C | 4.57230  | -0.09403 | 1.52141  |
| H | 4.19542  | -1.21111 | -1.67693 |
| H | 4.00537  | 0.27131  | 2.38426  |
| H | -2.09312 | 0.94356  | 2.59562  |
| H | -3.33801 | 0.96689  | 0.25349  |
| C | 2.42582  | 4.43670  | -1.14912 |
| N | 2.95575  | 5.42742  | -1.45215 |
| C | 4.16365  | 2.17496  | -0.51293 |
| N | 5.29726  | 2.41582  | -0.62254 |
| C | 3.03008  | -3.42358 | -0.94439 |
| N | 3.93271  | -4.12822 | -0.73950 |
| C | 0.61677  | -4.40456 | -2.46620 |
| N | 0.56266  | -5.48002 | -2.90867 |
| C | 3.12079  | -2.20187 | 2.90315  |
| N | 4.06899  | -2.82461 | 3.16152  |
| C | 0.80607  | -2.49514 | 4.67166  |
| N | 0.98645  | -3.13403 | 5.62741  |
| H | 6.46602  | 0.28711  | 2.49084  |
| H | 7.81524  | -0.46286 | 0.52397  |
| H | 6.65379  | -1.20030 | -1.56288 |
| C | 3.89207  | -0.55472 | 0.37467  |
| C | -4.70571 | 1.17024  | -0.15542 |
| C | -5.03261 | 2.22932  | 0.79668  |
| H | -4.62393 | 1.34268  | -1.23487 |
| C | -5.24920 | -0.06237 | 0.41411  |
| C | -4.83688 | 3.61853  | 0.73972  |
| C | -5.58092 | 1.63875  | 1.98067  |
| C | -5.29436 | -1.37244 | -0.08829 |
| C | -5.72281 | 0.20511  | 1.73843  |
| C | -5.15956 | 4.40230  | 1.85401  |
| H | -4.43784 | 4.08303  | -0.16827 |
| C | -5.88612 | 2.43160  | 3.09449  |
| C | -5.80534 | -2.39796 | 0.71522  |
| H | -4.93513 | -1.58893 | -1.09860 |
| C | -6.22107 | -0.83162 | 2.53808  |
| C | -5.67113 | 3.81460  | 3.02770  |
| H | -5.01166 | 5.48696  | 1.81385  |
| H | -6.29589 | 1.97813  | 4.00389  |
| C | -6.26349 | -2.13340 | 2.02078  |
| H | -5.84653 | -3.42071 | 0.32507  |
| H | -6.57902 | -0.62748 | 3.55324  |
| H | -5.91017 | 4.44556  | 3.89018  |
| H | -6.65420 | -2.95150 | 2.63476  |

Transition states for HAA by the  $L_3Co^{III}O$  oxidant

$L_3Co^{III}O + CHD$  ( $S=0$ , closed-shell)

88

chd\_ts\_u0.out Energy: -1953191.0114453

|    |          |          |          |
|----|----------|----------|----------|
| C  | 0.59355  | -1.03038 | -1.24508 |
| N  | 0.32421  | -2.05686 | -2.11087 |
| C  | 1.49669  | -2.75294 | -2.38646 |
| C  | 2.50217  | -2.14684 | -1.69890 |
| N  | 1.94488  | -1.06867 | -1.03227 |
| B  | 2.52413  | -0.15318 | 0.07639  |
| N  | 2.05748  | 1.29435  | -0.15828 |
| C  | 0.72537  | 1.55402  | -0.17418 |
| N  | 0.59461  | 2.90200  | -0.35431 |
| C  | 1.86253  | 3.47198  | -0.46435 |
| C  | 2.77370  | 2.46775  | -0.34093 |
| N  | 1.88198  | -0.66133 | 1.38829  |
| C  | 0.52706  | -0.51116 | 1.44110  |
| N  | 0.12250  | -1.13600 | 2.58568  |
| C  | 1.21813  | -1.72351 | 3.21067  |
| C  | 2.31428  | -1.44297 | 2.44984  |
| Co | -0.48564 | 0.13130  | -0.09203 |
| O  | -2.03674 | 0.25090  | -0.87293 |
| C  | -1.01024 | -2.40972 | -2.72676 |
| C  | -0.83567 | -3.59258 | -3.69168 |
| C  | -1.98484 | -2.81628 | -1.61135 |
| C  | -1.51546 | -1.18963 | -3.51159 |
| C  | -0.69772 | 3.66109  | -0.47266 |
| C  | -0.41657 | 5.16855  | -0.40237 |
| C  | -1.33941 | 3.31118  | -1.82518 |
| C  | -1.60945 | 3.26777  | 0.69858  |
| C  | -1.29062 | -1.15965 | 3.09388  |
| C  | -1.76550 | 0.29384  | 3.24460  |
| C  | -2.16430 | -1.92709 | 2.09097  |
| C  | -1.33912 | -1.85899 | 4.45803  |
| H  | -1.81845 | -3.81495 | -4.13534 |
| H  | -0.14506 | -3.35932 | -4.51882 |
| H  | -1.57470 | -3.65591 | -1.02471 |
| H  | -2.94043 | -3.13750 | -2.05762 |
| H  | -2.19175 | -1.96555 | -0.95217 |
| H  | -0.79062 | -0.91038 | -4.29559 |
| H  | -1.68644 | -0.34680 | -2.82620 |
| H  | -2.47249 | -1.44166 | -3.99866 |
| H  | 0.18143  | 5.52234  | -1.25774 |
| H  | 0.09331  | 5.44795  | 0.53461  |
| H  | -1.37934 | 5.70171  | -0.43481 |
| H  | -0.66734 | 3.59302  | -2.65331 |
| H  | -2.28534 | 3.86553  | -1.94189 |
| H  | -1.11433 | 3.46038  | 1.66440  |
| H  | -2.53982 | 3.85606  | 0.65515  |
| H  | -1.88553 | 2.20632  | 0.64341  |
| H  | -2.81409 | 0.31323  | 3.58079  |
| H  | -1.14138 | 0.83439  | 3.97575  |
| H  | -3.18653 | -2.02735 | 2.48711  |
| H  | -2.24256 | -1.38740 | 1.13638  |
| H  | -0.70732 | -1.35123 | 5.20526  |
| H  | -1.03778 | -2.91725 | 4.39001  |
| H  | -2.37702 | -1.83264 | 4.82455  |
| H  | -0.49214 | -4.50618 | -3.17883 |
| H  | -1.75224 | -2.93263 | 1.90448  |
| H  | -1.55705 | 2.23436  | -1.87784 |
| C  | 4.79081  | -0.13110 | -1.07551 |

|   |          |          |          |
|---|----------|----------|----------|
| C | 6.16874  | 0.03536  | -1.11347 |
| C | 6.86229  | 0.25759  | 0.08045  |
| C | 6.14093  | 0.33253  | 1.27597  |
| C | 4.76346  | 0.15793  | 1.24851  |
| H | 4.20752  | -0.26569 | -1.98683 |
| H | 6.68245  | 0.00054  | -2.07677 |
| H | 7.94805  | 0.38973  | 0.07658  |
| H | 6.63257  | 0.53585  | 2.22991  |
| H | 4.16024  | 0.25202  | 2.15136  |
| H | 1.54170  | -3.61578 | -3.04143 |
| H | 3.55192  | -2.42288 | -1.63629 |
| H | 2.02505  | 4.53381  | -0.61557 |
| H | 3.86016  | 2.51242  | -0.36506 |
| H | 1.14931  | -2.28680 | 4.13566  |
| H | 3.34549  | -1.75683 | 2.59353  |
| H | -1.71863 | 0.82380  | 2.28264  |
| H | -3.00104 | 0.75949  | -0.64981 |
| C | -4.39213 | 1.26877  | -0.53580 |
| C | -5.06891 | 0.25075  | -1.44217 |
| C | -4.62193 | 1.18948  | 0.87356  |
| H | -4.23379 | 2.26763  | -0.96513 |
| C | -5.38152 | -1.03652 | -0.71590 |
| H | -4.42703 | 0.04258  | -2.32296 |
| H | -6.01320 | 0.65739  | -1.88326 |
| C | -5.09658 | 0.04153  | 1.46856  |
| H | -4.32638 | 2.03913  | 1.50183  |
| C | -5.41275 | -1.10594 | 0.63917  |
| H | -5.64198 | -1.91546 | -1.31828 |
| H | -5.19429 | -0.03047 | 2.55624  |
| H | -5.68145 | -2.05059 | 1.12805  |
| N | 4.10311  | -0.10618 | 0.09399  |

### L<sub>3</sub>Co<sup>III</sup>O + CHD (S=1)

88

chd\_ts\_u2.out Energy: -1953193.8643920

|    |          |          |          |
|----|----------|----------|----------|
| C  | 0.67137  | -1.02286 | -1.43799 |
| N  | 0.49738  | -2.03300 | -2.32775 |
| C  | 1.68527  | -2.74022 | -2.48406 |
| C  | 2.61286  | -2.14027 | -1.68581 |
| N  | 1.99225  | -1.05448 | -1.07801 |
| B  | 2.46684  | -0.13449 | 0.08715  |
| N  | 2.02316  | 1.33001  | -0.16545 |
| C  | 0.70800  | 1.62991  | -0.33687 |
| N  | 0.63509  | 2.96782  | -0.53138 |
| C  | 1.91292  | 3.52300  | -0.48097 |
| C  | 2.78040  | 2.49649  | -0.25184 |
| N  | 1.79324  | -0.69990 | 1.37320  |
| C  | 0.43436  | -0.58450 | 1.49455  |
| N  | 0.09192  | -1.30335 | 2.59271  |
| C  | 1.21527  | -1.92426 | 3.12887  |
| C  | 2.27581  | -1.56329 | 2.35150  |
| Co | -0.50732 | 0.07885  | -0.20806 |
| O  | -2.21626 | -0.20032 | -0.34226 |
| C  | -0.81195 | -2.37684 | -2.98063 |
| C  | -0.55767 | -3.32383 | -4.16128 |
| C  | -1.70602 | -3.05846 | -1.93220 |

|   |          |          |          |
|---|----------|----------|----------|
| C | -1.46367 | -1.08110 | -3.48933 |
| C | -0.66125 | 3.68797  | -0.74598 |
| C | -0.39220 | 5.18013  | -0.96806 |
| C | -1.34840 | 3.08683  | -1.98373 |
| C | -1.53091 | 3.48910  | 0.50663  |
| C | -1.31477 | -1.43862 | 3.10297  |
| C | -1.96201 | -0.04540 | 3.11826  |
| C | -2.08425 | -2.37818 | 2.16074  |
| C | -1.28705 | -2.01248 | 4.52548  |
| H | -1.51393 | -3.50878 | -4.67492 |
| H | 0.14164  | -2.88444 | -4.89228 |
| H | -1.21328 | -3.95783 | -1.52508 |
| H | -2.65763 | -3.36465 | -2.39803 |
| H | -1.93058 | -2.35520 | -1.11612 |
| H | -0.78771 | -0.54730 | -4.17834 |
| H | -1.72937 | -0.42501 | -2.64753 |
| H | -2.38967 | -1.33117 | -4.03296 |
| H | 0.23474  | 5.35431  | -1.85814 |
| H | 0.09091  | 5.64451  | -0.09263 |
| H | -1.35337 | 5.69259  | -1.12945 |
| H | -0.69888 | 3.17283  | -2.87061 |
| H | -2.28920 | 3.62465  | -2.18524 |
| H | -1.02246 | 3.88294  | 1.40226  |
| H | -2.48949 | 4.01927  | 0.38549  |
| H | -1.74805 | 2.42136  | 0.66553  |
| H | -2.97815 | -0.11701 | 3.53757  |
| H | -1.37308 | 0.65443  | 3.73463  |
| H | -3.11005 | -2.52417 | 2.53855  |
| H | -2.14874 | -1.93085 | 1.15707  |
| H | -0.68337 | -1.38793 | 5.20520  |
| H | -0.90146 | -3.04495 | 4.55084  |
| H | -2.31721 | -2.03897 | 4.91360  |
| H | -0.16795 | -4.30234 | -3.83605 |
| H | -1.59037 | -3.36307 | 2.10170  |
| H | -1.58960 | 2.02448  | -1.82153 |
| C | 4.80853  | -0.08343 | -0.91963 |
| C | 6.18234  | 0.11387  | -0.87395 |
| C | 6.79555  | 0.36185  | 0.35808  |
| C | 5.99931  | 0.43024  | 1.50549  |
| C | 4.63029  | 0.22423  | 1.39412  |
| H | 4.28683  | -0.23804 | -1.86436 |
| H | 6.75551  | 0.08270  | -1.80325 |
| H | 7.87622  | 0.51891  | 0.42035  |
| H | 6.42573  | 0.65318  | 2.48607  |
| H | 3.96956  | 0.31045  | 2.25687  |
| H | 1.79256  | -3.59760 | -3.14112 |
| H | 3.65029  | -2.41960 | -1.51638 |
| H | 2.11382  | 4.58214  | -0.61027 |
| H | 3.86265  | 2.52480  | -0.14936 |
| H | 1.18965  | -2.55980 | 4.00879  |
| H | 3.31692  | -1.86757 | 2.43297  |
| H | -2.05495 | 0.35222  | 2.09774  |
| H | -3.24030 | 0.63145  | -0.26789 |
| C | -4.31651 | 1.27841  | -0.32043 |
| C | -5.26557 | 0.31240  | -1.02517 |
| C | -4.64096 | 1.57927  | 1.07499  |
| H | -4.04714 | 2.15525  | -0.92841 |
| C | -5.80553 | -0.74314 | -0.09424 |
| H | -4.75573 | -0.15454 | -1.88760 |

|   |          |          |          |
|---|----------|----------|----------|
| H | -6.13039 | 0.86282  | -1.46546 |
| C | -5.35217 | 0.69639  | 1.83338  |
| H | -4.21532 | 2.47796  | 1.53619  |
| C | -5.85546 | -0.53826 | 1.24343  |
| H | -6.21916 | -1.66021 | -0.53032 |
| H | -5.52654 | 0.88766  | 2.89760  |
| H | -6.29440 | -1.29601 | 1.90270  |
| N | 4.04850  | -0.06562 | 0.20372  |

**L<sub>3</sub>Co<sup>III</sup>O + fluorene (S=0, closed-shell)**

97

fluorene\_ts\_u0.out Energy: -2121326.5494847

|    |          |          |          |
|----|----------|----------|----------|
| C  | -1.10076 | -0.89407 | -1.30768 |
| N  | -0.65810 | -1.45156 | -2.47565 |
| C  | -1.73927 | -1.62782 | -3.33291 |
| C  | -2.85323 | -1.18524 | -2.68937 |
| N  | -2.45452 | -0.76767 | -1.43114 |
| N  | -2.83326 | -0.50758 | 1.04384  |
| C  | -1.53318 | -0.54950 | 1.42467  |
| N  | -1.51275 | -0.99573 | 2.71396  |
| C  | -2.82219 | -1.24354 | 3.12367  |
| C  | -3.64361 | -0.93803 | 2.08196  |
| N  | -2.59517 | 1.47615  | -0.45997 |
| C  | -1.26329 | 1.54180  | -0.18039 |
| N  | -0.87971 | 2.82100  | -0.44641 |
| C  | -1.96397 | 3.54023  | -0.93724 |
| C  | -3.03121 | 2.69147  | -0.96599 |
| Co | -0.21066 | -0.07441 | 0.18925  |
| O  | 1.27954  | -0.90738 | 0.38755  |
| C  | 0.74943  | -1.89405 | -2.82301 |
| C  | 0.77426  | -2.44982 | -4.25526 |
| C  | 1.69749  | -0.68805 | -2.75272 |
| C  | 1.14849  | -3.00711 | -1.84428 |
| C  | -0.29733 | -1.23952 | 3.57433  |
| C  | -0.74125 | -1.49185 | 5.02277  |
| C  | 0.43356  | -2.47718 | 3.03127  |
| C  | 0.59872  | 0.00852  | 3.54544  |
| C  | 0.47671  | 3.39186  | -0.13763 |
| C  | 0.63063  | 3.41080  | 1.39110  |
| C  | 1.55856  | 2.52369  | -0.79279 |
| C  | 0.57326  | 4.81986  | -0.68955 |
| H  | 1.80900  | -2.75301 | -4.47740 |
| H  | 0.13856  | -3.34270 | -4.37216 |
| H  | 1.36933  | 0.10373  | -3.44744 |
| H  | 2.71327  | -1.00897 | -3.03531 |
| H  | 1.75564  | -0.28874 | -1.73468 |
| H  | 0.44256  | -3.85227 | -1.91903 |
| H  | 1.17233  | -2.61511 | -0.81757 |
| H  | 2.15961  | -3.36609 | -2.09209 |
| H  | -1.33817 | -2.41242 | 5.12449  |
| H  | -1.31237 | -0.64240 | 5.43283  |
| H  | 0.16098  | -1.62034 | 5.64034  |
| H  | -0.22304 | -3.36240 | 3.07879  |
| H  | 1.32862  | -2.67570 | 3.64365  |
| H  | 0.03354  | 0.90401  | 3.85207  |

|   |          |          |          |
|---|----------|----------|----------|
| H | 1.43745  | -0.13058 | 4.24611  |
| H | 1.02941  | 0.17330  | 2.54980  |
| H | 1.62291  | 3.80108  | 1.66313  |
| H | -0.14546 | 4.04396  | 1.85300  |
| H | 2.53972  | 3.00730  | -0.67803 |
| H | 1.64703  | 1.53891  | -0.31042 |
| H | -0.15238 | 5.50139  | -0.21668 |
| H | 0.43247  | 4.84483  | -1.78288 |
| H | 1.58027  | 5.20731  | -0.47072 |
| H | 0.48253  | -1.69463 | -5.00388 |
| H | 1.35264  | 2.37951  | -1.86553 |
| H | 0.75058  | -2.30679 | 1.99230  |
| C | -5.35170 | -1.19415 | -0.81995 |
| C | -6.73151 | -1.34619 | -0.81740 |
| C | -7.53523 | -0.27595 | -0.41138 |
| C | -6.92121 | 0.90828  | 0.00763  |
| C | -5.53575 | 0.99918  | -0.01712 |
| H | -4.68865 | -2.01635 | -1.09108 |
| H | -7.16227 | -2.30239 | -1.12263 |
| H | -8.62487 | -0.37064 | -0.40313 |
| H | -7.50386 | 1.76048  | 0.36440  |
| H | -5.01877 | 1.88780  | 0.34418  |
| H | -1.64913 | -2.05212 | -4.32630 |
| H | -3.87746 | -1.13123 | -3.04958 |
| H | -3.07455 | -1.61301 | 4.11148  |
| H | -4.72748 | -0.99410 | 2.01483  |
| H | -1.90700 | 4.58389  | -1.22895 |
| H | -4.04028 | 2.87469  | -1.32683 |
| H | 0.54685  | 2.39408  | 1.80355  |
| H | 2.30955  | -0.91789 | 0.91797  |
| C | 3.63671  | -0.90298 | 1.45197  |
| C | 4.02319  | 0.50285  | 1.34399  |
| H | 3.48575  | -1.39610 | 2.42049  |
| C | 4.26926  | -1.57516 | 0.31873  |
| C | 3.78674  | 1.60044  | 2.18903  |
| C | 4.72006  | 0.70594  | 0.10690  |
| C | 4.28670  | -2.92738 | -0.06254 |
| C | 4.85675  | -0.59265 | -0.54326 |
| C | 4.24686  | 2.86855  | 1.81487  |
| H | 3.25183  | 1.46474  | 3.13501  |
| C | 5.15843  | 1.98470  | -0.26455 |
| C | 4.87075  | -3.29045 | -1.28092 |
| H | 3.83457  | -3.68877 | 0.58281  |
| C | 5.42414  | -0.96733 | -1.76950 |
| C | 4.92595  | 3.06497  | 0.59570  |
| H | 4.07765  | 3.72263  | 2.48007  |
| H | 5.68792  | 2.13584  | -1.21210 |
| C | 5.42910  | -2.31863 | -2.13647 |
| H | 4.88801  | -4.34447 | -1.57987 |
| H | 5.86160  | -0.21225 | -2.43255 |
| H | 5.27237  | 4.06710  | 0.32185  |
| H | 5.87312  | -2.62481 | -3.08962 |
| B | -3.19349 | 0.05243  | -0.34659 |
| N | -4.76398 | -0.02459 | -0.45955 |

Transition states for HAA by the  $L_4Co^{III}O$  oxidant

$L_4Co^{III}O + CHD$  ( $S=0$ , closed-shell)

97

| Atom                 | x        | y        | z        | Energy           |
|----------------------|----------|----------|----------|------------------|
| chd_ts_u0_closed.out |          |          |          | -2473983.3410898 |
| C                    | 0.55002  | -1.09129 | -1.38904 |                  |
| N                    | 0.19439  | -1.94118 | -2.39781 |                  |
| C                    | 1.21008  | -2.87547 | -2.57984 |                  |
| C                    | 2.24154  | -2.53309 | -1.72440 |                  |
| N                    | 1.84641  | -1.38291 | -1.05642 |                  |
| B                    | 2.43115  | -0.59288 | 0.14286  |                  |
| N                    | 2.10685  | 0.92036  | -0.05705 |                  |
| C                    | 0.80383  | 1.26953  | -0.26583 |                  |
| N                    | 0.75560  | 2.62343  | -0.38913 |                  |
| C                    | 2.04270  | 3.13747  | -0.24899 |                  |
| C                    | 2.89276  | 2.06657  | -0.04219 |                  |
| N                    | 1.61981  | -1.11637 | 1.37385  |                  |
| C                    | 0.32034  | -0.70578 | 1.47460  |                  |
| N                    | -0.17386 | -1.20639 | 2.64170  |                  |
| C                    | 0.75278  | -2.10667 | 3.16587  |                  |
| C                    | 1.87585  | -2.05888 | 2.35875  |                  |
| Co                   | -0.50919 | -0.10696 | -0.16514 |                  |
| O                    | -2.03617 | -0.80712 | 0.19067  |                  |
| C                    | -1.10973 | -1.91258 | -3.17568 |                  |
| C                    | -0.83513 | -2.24928 | -4.65122 |                  |
| C                    | -2.04461 | -2.93875 | -2.52196 |                  |
| C                    | -1.68388 | -0.49160 | -3.12539 |                  |
| C                    | -0.47475 | 3.47590  | -0.62455 |                  |
| C                    | -0.64908 | 4.40798  | 0.58570  |                  |
| C                    | -0.27969 | 4.24994  | -1.93865 |                  |
| C                    | -1.70712 | 2.58146  | -0.75165 |                  |
| C                    | -1.43680 | -0.76260 | 3.38341  |                  |
| C                    | -1.92551 | 0.58669  | 2.83647  |                  |
| C                    | -2.49788 | -1.85342 | 3.20534  |                  |
| C                    | -1.06344 | -0.55244 | 4.86363  |                  |
| H                    | -1.75539 | -2.05237 | -5.22220 |                  |
| H                    | -0.03506 | -1.61252 | -5.06307 |                  |
| H                    | -1.61745 | -3.95327 | -2.58280 |                  |
| H                    | -3.01237 | -2.94688 | -3.04797 |                  |
| H                    | -2.21036 | -2.67945 | -1.46527 |                  |
| H                    | -0.96249 | 0.24308  | -3.51655 |                  |
| H                    | -1.98024 | -0.20398 | -2.11037 |                  |
| H                    | -2.58917 | -0.45728 | -3.75053 |                  |
| H                    | 0.18651  | 5.11423  | 0.70146  |                  |
| H                    | -0.74903 | 3.82014  | 1.51283  |                  |
| H                    | -1.56720 | 5.00086  | 0.45004  |                  |
| H                    | 0.57020  | 4.94690  | -1.90131 |                  |
| H                    | -1.18446 | 4.84478  | -2.13913 |                  |
| H                    | -1.93047 | 2.03399  | 0.17479  |                  |
| H                    | -2.57845 | 3.22057  | -0.96110 |                  |
| H                    | -1.61417 | 1.87578  | -1.58965 |                  |
| H                    | -2.70193 | 0.96451  | 3.51873  |                  |
| H                    | -1.10565 | 1.32421  | 2.80377  |                  |
| H                    | -3.41823 | -1.55330 | 3.73020  |                  |
| H                    | -2.71590 | -1.96856 | 2.13349  |                  |
| H                    | -0.22739 | 0.15961  | 4.96259  |                  |
| H                    | -0.80810 | -1.48116 | 5.39026  |                  |
| H                    | -1.93799 | -0.12633 | 5.37841  |                  |



|   |          |          |          |
|---|----------|----------|----------|
| H | -0.57912 | -3.30341 | -4.81602 |
| H | -2.16339 | -2.81642 | 3.62543  |
| H | -0.12976 | 3.55158  | -2.77817 |
| C | 4.76811  | -0.78957 | -0.82191 |
| C | 6.15341  | -0.83820 | -0.74602 |
| C | 6.78901  | -0.78399 | 0.52572  |
| C | 5.95634  | -0.63560 | 1.66779  |
| C | 4.57697  | -0.59391 | 1.51137  |
| H | 4.26985  | -0.76627 | -1.79169 |
| H | 3.93149  | -0.41794 | 2.37183  |
| H | -2.36394 | 0.48203  | 1.83943  |
| H | -3.12784 | -0.81216 | -0.42231 |
| C | -4.38425 | -0.78813 | -0.84742 |
| C | -5.12957 | -1.53989 | 0.24442  |
| C | -4.57449 | 0.64430  | -0.90353 |
| H | -4.33880 | -1.30558 | -1.81438 |
| C | -5.38808 | -0.70622 | 1.46586  |
| H | -4.59487 | -2.46917 | 0.51570  |
| H | -6.11356 | -1.89644 | -0.14361 |
| C | -4.98273 | 1.34550  | 0.20303  |
| H | -4.28096 | 1.18231  | -1.81200 |
| C | -5.32418 | 0.64912  | 1.42770  |
| H | -5.68655 | -1.21962 | 2.38653  |
| H | -5.04286 | 2.43819  | 0.17554  |
| H | -5.55104 | 1.23673  | 2.32368  |
| N | 3.98652  | -0.72213 | 0.29130  |
| C | 2.43360  | 4.50030  | -0.29862 |
| N | 2.80077  | 5.60393  | -0.32774 |
| C | 4.29455  | 2.15547  | 0.14731  |
| N | 5.44411  | 2.24668  | 0.30483  |
| C | 3.43887  | -3.25919 | -1.50467 |
| N | 4.42168  | -3.85090 | -1.30722 |
| C | 1.20128  | -4.03297 | -3.40102 |
| N | 1.25971  | -5.01724 | -4.01842 |
| C | 3.02831  | -2.88060 | 2.44357  |
| N | 3.97348  | -3.55833 | 2.49111  |
| C | 0.56712  | -3.01138 | 4.24362  |
| N | 0.46538  | -3.80379 | 5.08949  |
| C | 8.20505  | -0.83919 | 0.64571  |
| N | 9.36414  | -0.88414 | 0.74330  |
| C | 6.50908  | -0.50899 | 2.98215  |
| N | 6.95291  | -0.40767 | 4.05086  |
| C | 6.91313  | -0.92514 | -1.95606 |
| N | 7.52575  | -0.99909 | -2.94033 |

**LaCo<sup>III</sup>O + CHD (S=0, open-shell)**

97

|                    |         |                  |          |
|--------------------|---------|------------------|----------|
| chd_ts_u0_open.out | Energy: | -2473988.7504598 |          |
| C                  | 0.50235 | -1.06960         | -1.39843 |
| N                  | 0.16984 | -1.93634         | -2.39362 |
| C                  | 1.15217 | -2.91652         | -2.49935 |
| C                  | 2.15397 | -2.58644         | -1.60391 |
| N                  | 1.77321 | -1.39634         | -0.99462 |
| B                  | 2.37290 | -0.56296         | 0.17302  |
| N                  | 2.08130 | 0.94610          | -0.07184 |
| C                  | 0.77322 | 1.32075          | -0.22895 |
| N                  | 0.75411 | 2.66996          | -0.39197 |

|    |          |          |          |
|----|----------|----------|----------|
| C  | 2.05640  | 3.15983  | -0.33497 |
| C  | 2.89202  | 2.07632  | -0.13617 |
| N  | 1.62375  | -1.03572 | 1.45470  |
| C  | 0.32747  | -0.61406 | 1.58709  |
| N  | -0.15119 | -1.15245 | 2.73893  |
| C  | 0.78179  | -2.05129 | 3.24837  |
| C  | 1.89504  | -1.99169 | 2.42737  |
| Co | -0.53092 | -0.07121 | -0.11607 |
| O  | -1.84659 | -1.22421 | 0.13809  |
| C  | -1.06775 | -1.85145 | -3.26568 |
| C  | -0.65634 | -2.05767 | -4.73389 |
| C  | -2.04819 | -2.92753 | -2.77987 |
| C  | -1.66706 | -0.44615 | -3.14019 |
| C  | -0.47617 | 3.52773  | -0.58395 |
| C  | -0.57957 | 4.49283  | 0.60807  |
| C  | -0.34832 | 4.26743  | -1.92565 |
| C  | -1.71787 | 2.63577  | -0.62278 |
| C  | -1.46182 | -0.78504 | 3.41824  |
| C  | -2.01844 | 0.50050  | 2.79366  |
| C  | -2.43847 | -1.95219 | 3.22691  |
| C  | -1.16849 | -0.50739 | 4.90376  |
| H  | -1.53971 | -1.88273 | -5.36743 |
| H  | 0.12583  | -1.33872 | -5.02844 |
| H  | -1.63112 | -3.93878 | -2.91614 |
| H  | -2.98197 | -2.86632 | -3.36126 |
| H  | -2.26749 | -2.76515 | -1.71367 |
| H  | -0.93200 | 0.32936  | -3.40757 |
| H  | -2.04166 | -0.25760 | -2.12912 |
| H  | -2.52217 | -0.36906 | -3.82892 |
| H  | 0.26953  | 5.19084  | 0.66062  |
| H  | -0.63642 | 3.93092  | 1.55476  |
| H  | -1.49678 | 5.09369  | 0.50492  |
| H  | 0.50384  | 4.96248  | -1.94789 |
| H  | -1.26095 | 4.85998  | -2.09527 |
| H  | -1.88564 | 2.10559  | 0.32718  |
| H  | -2.59995 | 3.27266  | -0.78739 |
| H  | -1.67801 | 1.91695  | -1.45547 |
| H  | -2.88683 | 0.82051  | 3.38862  |
| H  | -1.26963 | 1.30932  | 2.80675  |
| H  | -3.39899 | -1.70344 | 3.70427  |
| H  | -2.60028 | -2.11073 | 2.14954  |
| H  | -0.39896 | 0.27470  | 5.01328  |
| H  | -0.85185 | -1.40030 | 5.45994  |
| H  | -2.09468 | -0.14646 | 5.37701  |
| H  | -0.30568 | -3.07607 | -4.94801 |
| H  | -2.05894 | -2.87920 | 3.68750  |
| H  | -0.24183 | 3.54779  | -2.75379 |
| C  | 4.69684  | -0.85957 | -0.83134 |
| C  | 6.08791  | -0.95140 | -0.78288 |
| C  | 6.74061  | -0.84813 | 0.46735  |
| C  | 5.95063  | -0.61348 | 1.61632  |
| C  | 4.56342  | -0.53969 | 1.48322  |
| H  | 4.17535  | -0.88037 | -1.78929 |
| H  | 3.93740  | -0.30722 | 2.34557  |
| H  | -2.36454 | 0.32527  | 1.76863  |
| H  | -3.11078 | -0.93128 | -0.45108 |
| C  | -4.26764 | -0.79315 | -0.78970 |
| C  | -5.07068 | -1.56855 | 0.25575  |
| C  | -4.49360 | 0.66043  | -0.81039 |

|   |          |          |          |
|---|----------|----------|----------|
| H | -4.30448 | -1.25995 | -1.78552 |
| C | -5.34941 | -0.77387 | 1.50145  |
| H | -4.55298 | -2.51187 | 0.50757  |
| H | -6.04767 | -1.88745 | -0.17372 |
| C | -4.94541 | 1.31491  | 0.29492  |
| H | -4.20623 | 1.22574  | -1.70418 |
| C | -5.29900 | 0.57840  | 1.50197  |
| H | -5.65372 | -1.31680 | 2.40347  |
| H | -5.04171 | 2.40600  | 0.29370  |
| H | -5.54483 | 1.14142  | 2.40892  |
| N | 3.95411  | -0.70638 | 0.28808  |
| C | 2.47001  | 4.51178  | -0.45068 |
| N | 2.85046  | 5.60809  | -0.53543 |
| C | 4.30391  | 2.13522  | -0.03354 |
| N | 5.46423  | 2.18350  | 0.04782  |
| C | 3.31480  | -3.34067 | -1.29997 |
| N | 4.27421  | -3.94196 | -1.02806 |
| C | 1.12331  | -4.08969 | -3.29711 |
| N | 1.14205  | -5.08141 | -3.90529 |
| C | 3.06157  | -2.79295 | 2.50378  |
| N | 4.02878  | -3.44033 | 2.54260  |
| C | 0.61992  | -2.93922 | 4.34360  |
| N | 0.52947  | -3.70799 | 5.21226  |
| C | 8.16269  | -0.94820 | 0.56210  |
| N | 9.31905  | -1.03010 | 0.63885  |
| C | 6.54096  | -0.43572 | 2.90821  |
| N | 7.01334  | -0.29145 | 3.95916  |
| C | 6.81908  | -1.14227 | -1.99860 |
| N | 7.40566  | -1.30074 | -2.98817 |

#### LaCo<sup>III</sup>O + CHD (S=1)

97

chd\_ts\_u2\_2.out Energy: -2473990.8391188

|    |          |          |          |
|----|----------|----------|----------|
| C  | 0.51943  | -1.03931 | -1.44596 |
| N  | 0.18552  | -1.90672 | -2.43694 |
| C  | 1.14944  | -2.90707 | -2.52029 |
| C  | 2.14035  | -2.59330 | -1.60623 |
| N  | 1.77377  | -1.38936 | -1.01344 |
| B  | 2.36674  | -0.55711 | 0.16202  |
| N  | 2.08657  | 0.95263  | -0.08733 |
| C  | 0.78043  | 1.33799  | -0.22843 |
| N  | 0.77132  | 2.68205  | -0.42597 |
| C  | 2.07989  | 3.15868  | -0.41105 |
| C  | 2.90788  | 2.07143  | -0.20139 |
| N  | 1.60764  | -1.01688 | 1.44185  |
| C  | 0.30973  | -0.59378 | 1.57374  |
| N  | -0.16985 | -1.13427 | 2.72368  |
| C  | 0.76304  | -2.03105 | 3.23582  |
| C  | 1.87726  | -1.97134 | 2.41686  |
| Co | -0.53013 | -0.05542 | -0.11886 |
| O  | -1.75662 | -1.31824 | 0.02783  |
| C  | -1.03465 | -1.80172 | -3.33121 |
| C  | -0.58422 | -1.95953 | -4.79392 |
| C  | -2.02441 | -2.89350 | -2.90153 |
| C  | -1.65406 | -0.40886 | -3.17224 |
| C  | -0.45404 | 3.54343  | -0.62759 |
| C  | -0.52747 | 4.55624  | 0.52632  |

|   |          |          |          |
|---|----------|----------|----------|
| C | -0.34592 | 4.22765  | -2.00002 |
| C | -1.70229 | 2.65976  | -0.60518 |
| C | -1.49550 | -0.79470 | 3.38088  |
| C | -2.07695 | 0.46488  | 2.72996  |
| C | -2.43579 | -1.99137 | 3.18839  |
| C | -1.23232 | -0.48973 | 4.86632  |
| H | -1.45557 | -1.79061 | -5.44560 |
| H | 0.18693  | -1.21420 | -5.04965 |
| H | -1.60934 | -3.90190 | -3.06161 |
| H | -2.94582 | -2.80963 | -3.49985 |
| H | -2.26336 | -2.76077 | -1.83518 |
| H | -0.92244 | 0.38688  | -3.38394 |
| H | -2.06195 | -0.27276 | -2.16520 |
| H | -2.48645 | -0.31598 | -3.88644 |
| H | 0.32605  | 5.25067  | 0.53290  |
| H | -0.56738 | 4.03307  | 1.49576  |
| H | -1.44349 | 5.15801  | 0.41792  |
| H | 0.51305  | 4.91163  | -2.06574 |
| H | -1.25549 | 4.82322  | -2.17546 |
| H | -1.85388 | 2.17438  | 0.37115  |
| H | -2.58304 | 3.29561  | -0.78085 |
| H | -1.68355 | 1.90819  | -1.41033 |
| H | -2.96688 | 0.76670  | 3.30132  |
| H | -1.35302 | 1.29551  | 2.74391  |
| H | -3.41671 | -1.75794 | 3.62993  |
| H | -2.55827 | -2.17702 | 2.11052  |
| H | -0.49513 | 0.32285  | 4.97598  |
| H | -0.88658 | -1.36390 | 5.43504  |
| H | -2.17767 | -0.16101 | 5.32510  |
| H | -0.20091 | -2.96305 | -5.02389 |
| H | -2.04675 | -2.89788 | 3.68024  |
| H | -0.26291 | 3.47479  | -2.80091 |
| C | 4.70444  | -0.91193 | -0.80213 |
| C | 6.09390  | -1.01365 | -0.72828 |
| C | 6.72833  | -0.86537 | 0.52659  |
| C | 5.92209  | -0.58325 | 1.65374  |
| C | 4.53795  | -0.50537 | 1.49625  |
| H | 4.19861  | -0.96184 | -1.76682 |
| H | 3.89911  | -0.24226 | 2.34048  |
| H | -2.40096 | 0.26842  | 1.70164  |
| H | -3.04608 | -0.93084 | -0.30694 |
| C | -4.22822 | -0.76238 | -0.61039 |
| C | -5.04012 | -1.61199 | 0.36757  |
| C | -4.47056 | 0.68375  | -0.55555 |
| H | -4.23531 | -1.17109 | -1.63275 |
| C | -5.40602 | -0.88623 | 1.63273  |
| H | -4.49882 | -2.54745 | 0.60038  |
| H | -5.98412 | -1.94973 | -0.11767 |
| C | -4.98621 | 1.27185  | 0.56005  |
| H | -4.15489 | 1.30009  | -1.40451 |
| C | -5.39143 | 0.46514  | 1.70382  |
| H | -5.74641 | -1.48146 | 2.48773  |
| H | -5.09788 | 2.36013  | 0.61262  |
| H | -5.70272 | 0.97392  | 2.62269  |
| N | 3.94581  | -0.71007 | 0.29797  |
| C | 2.50356  | 4.50268  | -0.57285 |
| N | 2.89133  | 5.59258  | -0.69761 |
| C | 4.32214  | 2.11520  | -0.12826 |
| N | 5.48434  | 2.14902  | -0.06982 |

|   |         |          |          |
|---|---------|----------|----------|
| C | 3.27722 | -3.37210 | -1.27407 |
| N | 4.21602 | -3.99491 | -0.97932 |
| C | 1.11380 | -4.07631 | -3.32356 |
| N | 1.12088 | -5.06220 | -3.94142 |
| C | 3.04551 | -2.76920 | 2.50060  |
| N | 4.01349 | -3.41483 | 2.54878  |
| C | 0.60264 | -2.91184 | 4.33686  |
| N | 0.51375 | -3.67290 | 5.21248  |
| C | 8.14820 | -0.96919 | 0.64754  |
| N | 9.30274 | -1.05373 | 0.74572  |
| C | 6.49357 | -0.36498 | 2.94796  |
| N | 6.95069 | -0.18835 | 4.00071  |
| C | 6.84147 | -1.25647 | -1.92472 |
| N | 7.44099 | -1.45709 | -2.89878 |

### LiCo<sup>III</sup>O + CHD (S=2)

97

chd\_ts\_u4.out Energy: -2473981.7679737

|    |          |          |          |
|----|----------|----------|----------|
| C  | 0.51022  | -1.22864 | -1.30077 |
| N  | 0.12475  | -2.32619 | -2.00011 |
| C  | 1.10120  | -3.31002 | -1.90520 |
| C  | 2.14168  | -2.77035 | -1.16882 |
| N  | 1.79191  | -1.45324 | -0.87623 |
| B  | 2.41026  | -0.46823 | 0.16306  |
| N  | 2.05739  | 1.02967  | -0.16520 |
| C  | 0.77850  | 1.51196  | -0.03315 |
| N  | 0.80112  | 2.82741  | -0.34480 |
| C  | 2.08187  | 3.19216  | -0.73945 |
| C  | 2.87329  | 2.06392  | -0.63586 |
| N  | 1.80237  | -0.93668 | 1.52912  |
| C  | 0.44600  | -0.82095 | 1.69175  |
| N  | 0.13400  | -1.40765 | 2.87683  |
| C  | 1.27660  | -1.96540 | 3.43853  |
| C  | 2.32587  | -1.68949 | 2.57810  |
| Co | -0.58671 | -0.00471 | 0.02099  |
| O  | -2.31550 | -0.18248 | 0.24190  |
| C  | -1.22047 | -2.44445 | -2.69901 |
| C  | -1.08275 | -3.33410 | -3.94305 |
| C  | -2.20993 | -3.03764 | -1.68623 |
| C  | -1.64811 | -1.03938 | -3.14703 |
| C  | -0.37518 | 3.78277  | -0.26003 |
| C  | 0.02343  | 4.95144  | 0.65760  |
| C  | -0.71361 | 4.24821  | -1.68445 |
| C  | -1.57640 | 3.06130  | 0.34939  |
| C  | -1.29090 | -1.44145 | 3.42370  |
| C  | -1.82297 | 0.00048  | 3.41864  |
| C  | -2.10962 | -2.36243 | 2.50822  |
| C  | -1.31347 | -1.97738 | 4.85801  |
| H  | -2.00973 | -3.24455 | -4.52978 |
| H  | -0.24458 | -3.00951 | -4.58160 |
| H  | -1.85418 | -4.01102 | -1.30924 |
| H  | -3.18276 | -3.19978 | -2.17745 |
| H  | -2.34996 | -2.34206 | -0.84358 |
| H  | -0.87772 | -0.57490 | -3.78309 |
| H  | -1.85509 | -0.38227 | -2.29404 |
| H  | -2.57547 | -1.12746 | -3.73351 |
| H  | 0.85093  | 5.55298  | 0.25489  |

|   |          |          |          |
|---|----------|----------|----------|
| H | 0.30543  | 4.58032  | 1.65644  |
| H | -0.84262 | 5.62203  | 0.77003  |
| H | 0.11376  | 4.80205  | -2.15455 |
| H | -1.58504 | 4.92070  | -1.64498 |
| H | -1.34433 | 2.63817  | 1.33851  |
| H | -2.38726 | 3.79549  | 0.47151  |
| H | -1.94774 | 2.25372  | -0.29365 |
| H | -2.82688 | 0.00629  | 3.87248  |
| H | -1.16930 | 0.65872  | 4.01456  |
| H | -3.13890 | -2.42868 | 2.89664  |
| H | -2.15797 | -1.95269 | 1.48916  |
| H | -0.68466 | -1.38244 | 5.53956  |
| H | -1.02566 | -3.03694 | 4.91912  |
| H | -2.35066 | -1.90457 | 5.21963  |
| H | -0.96220 | -4.39773 | -3.69880 |
| H | -1.67926 | -3.37762 | 2.49091  |
| H | -0.97009 | 3.38443  | -2.31957 |
| C | 4.71809  | -0.96375 | -0.87273 |
| C | 6.11376  | -0.97217 | -0.86769 |
| C | 6.80100  | -0.46413 | 0.25822  |
| C | 6.03760  | 0.05567  | 1.32921  |
| C | 4.64582  | 0.01198  | 1.25324  |
| H | 4.17000  | -1.27275 | -1.76216 |
| H | 4.03225  | 0.43126  | 2.05328  |
| H | -1.91989 | 0.39058  | 2.39642  |
| H | -3.30913 | 0.43856  | -0.62875 |
| C | -4.19726 | 0.86785  | -1.31559 |
| C | -5.03875 | -0.34876 | -1.69929 |
| C | -4.88685 | 1.83380  | -0.44092 |
| H | -3.69179 | 1.33138  | -2.17772 |
| C | -5.91247 | -0.82255 | -0.56958 |
| H | -4.39196 | -1.16495 | -2.05876 |
| H | -5.69684 | -0.09897 | -2.56344 |
| C | -5.86971 | 1.41856  | 0.40664  |
| H | -4.53485 | 2.87056  | -0.40849 |
| C | -6.30697 | 0.02823  | 0.40812  |
| H | -6.27956 | -1.85527 | -0.58958 |
| H | -6.33193 | 2.12043  | 1.10921  |
| H | -6.98444 | -0.31107 | 1.19949  |
| N | 4.00609  | -0.52190 | 0.18632  |
| C | 2.51596  | 4.46220  | -1.20172 |
| N | 2.91061  | 5.48219  | -1.59816 |
| C | 4.24655  | 2.03569  | -0.98588 |
| N | 5.37056  | 2.04902  | -1.28838 |
| C | 3.29831  | -3.45166 | -0.71432 |
| N | 4.24469  | -3.99736 | -0.31107 |
| C | 1.06886  | -4.64720 | -2.38196 |
| N | 1.11037  | -5.76093 | -2.71472 |
| C | 3.65392  | -2.16039 | 2.72893  |
| N | 4.74248  | -2.55459 | 2.85437  |
| C | 1.43888  | -2.71194 | 4.63674  |
| N | 1.68182  | -3.33475 | 5.58851  |
| C | 8.22886  | -0.44769 | 0.30088  |
| N | 9.39005  | -0.43282 | 0.33509  |
| C | 6.65994  | 0.62297  | 2.48657  |
| N | 7.15927  | 1.08129  | 3.42945  |
| C | 6.81428  | -1.47018 | -2.01217 |
| N | 7.37660  | -1.87749 | -2.94296 |

**LaCo<sup>III</sup>O + DHA (S=0, closed-shell)**

109

|                      |          |                  |          |
|----------------------|----------|------------------|----------|
| dha_ts_u0_closed.out | Energy:  | -2666775.9590959 |          |
| C                    | 0.72574  | -1.08055         | -1.32129 |
| N                    | 0.37251  | -1.90220         | -2.35530 |
| C                    | 1.41482  | -2.78930         | -2.60154 |
| C                    | 2.45563  | -2.44766         | -1.75696 |
| N                    | 2.03786  | -1.34172         | -1.03025 |
| B                    | 2.61653  | -0.60350         | 0.20319  |
| N                    | 2.26206  | 0.90926          | 0.09756  |
| C                    | 0.95141  | 1.23654          | -0.08559 |
| N                    | 0.86724  | 2.59356          | -0.14114 |
| C                    | 2.14177  | 3.13089          | 0.02567  |
| C                    | 3.01946  | 2.07294          | 0.17347  |
| N                    | 1.83689  | -1.22497         | 1.40449  |
| C                    | 0.52094  | -0.87636         | 1.53940  |
| N                    | 0.06054  | -1.48564         | 2.67048  |
| C                    | 1.02731  | -2.37986         | 3.12230  |
| C                    | 2.14056  | -2.22561         | 2.31592  |
| Co                   | -0.34258 | -0.15522         | -0.05138 |
| O                    | -1.93420 | -0.75438         | 0.20292  |
| C                    | -0.95396 | -1.86783         | -3.10133 |
| C                    | -0.74093 | -2.28435         | -4.56569 |
| C                    | -1.90902 | -2.83179         | -2.38672 |
| C                    | -1.46420 | -0.42103         | -3.10066 |
| C                    | -0.38090 | 3.43346          | -0.34620 |
| C                    | -0.59153 | 4.28653          | 0.91498  |
| C                    | -0.17988 | 4.28779          | -1.60899 |
| C                    | -1.59592 | 2.52821          | -0.55124 |
| C                    | -1.23437 | -1.17318         | 3.42499  |
| C                    | -1.67851 | 0.25750          | 3.09356  |
| C                    | -2.27911 | -2.21191         | 3.00990  |
| C                    | -0.95090 | -1.22775         | 4.93759  |
| H                    | -1.67202 | -2.06900         | -5.11173 |
| H                    | 0.07224  | -1.70956         | -5.03906 |
| H                    | -1.49861 | -3.85536         | -2.38969 |
| H                    | -2.87688 | -2.84489         | -2.90929 |
| H                    | -2.07563 | -2.50792         | -1.34877 |
| H                    | -0.69539 | 0.27170          | -3.47833 |
| H                    | -1.79085 | -0.09987         | -2.10579 |
| H                    | -2.34186 | -0.36288         | -3.75882 |
| H                    | 0.23072  | 4.99667          | 1.08862  |
| H                    | -0.69805 | 3.64109          | 1.80226  |
| H                    | -1.51653 | 4.87287          | 0.79896  |
| H                    | 0.64935  | 5.00354          | -1.51445 |
| H                    | -1.09610 | 4.87010          | -1.79317 |
| H                    | -1.83463 | 1.93318          | 0.34111  |
| H                    | -2.46832 | 3.16917          | -0.75280 |
| H                    | -1.47102 | 1.86767          | -1.42151 |
| H                    | -2.53338 | 0.50567          | 3.74012  |
| H                    | -0.86766 | 0.97915          | 3.28924  |
| H                    | -3.22384 | -2.00717         | 3.53606  |
| H                    | -2.45678 | -2.13476         | 1.92757  |
| H                    | -0.08735 | -0.59812         | 5.20917  |
| H                    | -0.79271 | -2.24450         | 5.31868  |
| H                    | -1.83613 | -0.83039         | 5.45688  |
| H                    | -0.54686 | -3.35758         | -4.68555 |

|   |          |          |          |
|---|----------|----------|----------|
| H | -1.94918 | -3.23216 | 3.26846  |
| H | 0.00423  | 3.64377  | -2.48441 |
| C | 4.94067  | -0.67588 | -0.80190 |
| C | 6.33038  | -0.68812 | -0.75389 |
| C | 6.98293  | -0.69757 | 0.50657  |
| C | 6.17310  | -0.65852 | 1.67021  |
| C | 4.78793  | -0.64499 | 1.53907  |
| H | 4.42154  | -0.60804 | -1.75843 |
| H | 4.15246  | -0.54697 | 2.41908  |
| H | -2.01549 | 0.34651  | 2.05776  |
| N | 4.18308  | -0.70122 | 0.32489  |
| C | 2.50077  | 4.50328  | 0.05572  |
| N | 2.84509  | 5.61386  | 0.09402  |
| C | 4.41858  | 2.18550  | 0.36775  |
| N | 5.56647  | 2.28914  | 0.52979  |
| C | 3.68226  | -3.13917 | -1.59747 |
| N | 4.69091  | -3.70079 | -1.44722 |
| C | 1.44165  | -3.90893 | -3.47413 |
| N | 1.54917  | -4.86266 | -4.13125 |
| C | 3.32422  | -3.00558 | 2.33454  |
| N | 4.29603  | -3.64649 | 2.32556  |
| C | 0.89968  | -3.37773 | 4.12429  |
| N | 0.86531  | -4.24800 | 4.89549  |
| C | 8.40468  | -0.71030 | 0.59764  |
| N | 9.56544  | -0.71925 | 0.67091  |
| C | 6.74823  | -0.61428 | 2.98024  |
| N | 7.20913  | -0.58091 | 4.04579  |
| C | 7.07104  | -0.67563 | -1.97892 |
| N | 7.66732  | -0.66896 | -2.97564 |
| H | -2.98396 | -0.50741 | -0.34969 |
| C | -4.26116 | -0.13855 | -0.69196 |
| C | -4.80148 | -1.14666 | -1.60947 |
| C | -4.79103 | -0.13286 | 0.67767  |
| H | -4.09166 | 0.85415  | -1.13359 |
| C | -5.22743 | -2.39039 | -1.07778 |
| C | -4.90415 | -0.92315 | -2.99849 |
| C | -5.24267 | -1.35695 | 1.23318  |
| C | -4.80812 | 1.03297  | 1.47016  |
| C | -5.71229 | -3.37911 | -1.94046 |
| C | -5.09558 | -2.61668 | 0.41049  |
| C | -5.38554 | -1.91913 | -3.85017 |
| H | -4.61014 | 0.05038  | -3.40428 |
| C | -5.73660 | -1.37622 | 2.54130  |
| C | -5.28833 | 0.99682  | 2.78016  |
| H | -4.44379 | 1.97346  | 1.04299  |
| C | -5.78375 | -3.15616 | -3.32246 |
| H | -6.03894 | -4.33969 | -1.52650 |
| H | -5.79145 | -3.39967 | 0.75486  |
| H | -4.07549 | -3.01632 | 0.60160  |
| H | -5.45683 | -1.73103 | -4.92631 |
| H | -6.09402 | -2.32080 | 2.96643  |
| C | -5.76099 | -0.20924 | 3.31772  |
| H | -5.30006 | 1.90986  | 3.38418  |
| H | -6.16152 | -3.94185 | -3.98438 |
| H | -6.14626 | -0.24232 | 4.34181  |

L<sub>4</sub>Co<sup>III</sup>O + DHA (S=0, open-shell)



109

|                    |          |                  |          |
|--------------------|----------|------------------|----------|
| dha_ts_u0_open.out | Energy:  | -2666781.0328174 |          |
| C                  | 0.58148  | -1.26096         | -1.33938 |
| N                  | 0.27340  | -2.23583         | -2.23721 |
| C                  | 1.27782  | -3.19841         | -2.23644 |
| C                  | 2.27110  | -2.74951         | -1.38397 |
| N                  | 1.85738  | -1.51211         | -0.90500 |
| B                  | 2.43195  | -0.54613         | 0.17324  |
| N                  | 2.10696  | 0.92383          | -0.21273 |
| C                  | 0.78836  | 1.24280          | -0.36452 |
| N                  | 0.71782  | 2.55089          | -0.72198 |
| C                  | 2.00646  | 3.07398          | -0.79669 |
| C                  | 2.88154  | 2.05083          | -0.47761 |
| N                  | 1.67907  | -0.91515         | 1.48093  |
| C                  | 0.35961  | -0.54399         | 1.57106  |
| N                  | -0.09956 | -1.01675         | 2.76337  |
| C                  | 0.86499  | -1.83871         | 3.33609  |
| C                  | 1.98047  | -1.78763         | 2.51972  |
| Co                 | -0.50235 | -0.11897         | -0.10353 |
| O                  | -1.91107 | -1.18916         | -0.10385 |
| C                  | -0.93548 | -2.25095         | -3.16182 |
| C                  | -0.46721 | -2.64618         | -4.57390 |
| C                  | -1.95171 | -3.24670         | -2.59180 |
| C                  | -1.52543 | -0.83880         | -3.23974 |
| C                  | -0.55250 | 3.32123          | -1.00493 |
| C                  | -0.65177 | 4.47609          | 0.00414  |
| C                  | -0.50358 | 3.81703          | -2.45900 |
| C                  | -1.75676 | 2.39007          | -0.83096 |
| C                  | -1.43878 | -0.67915         | 3.39275  |
| C                  | -1.96752 | 0.60933          | 2.75314  |
| C                  | -2.37879 | -1.86543         | 3.15027  |
| C                  | -1.23199 | -0.40399         | 4.89248  |
| H                  | -1.32007 | -2.52939         | -5.26015 |
| H                  | 0.34521  | -1.98655         | -4.92139 |
| H                  | -1.53825 | -4.26848         | -2.55776 |
| H                  | -2.84913 | -3.25713         | -3.22911 |
| H                  | -2.24578 | -2.92694         | -1.58047 |
| H                  | -0.76106 | -0.09921         | -3.52937 |
| H                  | -1.98533 | -0.55351         | -2.28795 |
| H                  | -2.31982 | -0.84163         | -4.00020 |
| H                  | 0.17046  | 5.19944          | -0.10263 |
| H                  | -0.65196 | 4.08817          | 1.03603  |
| H                  | -1.59478 | 5.01963          | -0.16382 |
| H                  | 0.32112  | 4.52340          | -2.63593 |
| H                  | -1.44371 | 4.34191          | -2.69033 |
| H                  | -1.84245 | 2.01908          | 0.20234  |
| H                  | -2.67347 | 2.96330          | -1.03933 |
| H                  | -1.73719 | 1.55239          | -1.54611 |
| H                  | -2.85969 | 0.92859          | 3.30875  |
| H                  | -1.21843 | 1.41591          | 2.79766  |
| H                  | -3.37082 | -1.64465         | 3.57165  |
| H                  | -2.48170 | -2.03599         | 2.06813  |
| H                  | -0.47054 | 0.37716          | 5.05288  |
| H                  | -0.95538 | -1.29875         | 5.46519  |
| H                  | -2.18634 | -0.04357         | 5.30633  |
| H                  | -0.13861 | -3.69115         | -4.65001 |
| H                  | -1.99419 | -2.77969         | 3.63208  |
| H                  | -0.39927 | 2.96722          | -3.15337 |
| C                  | 4.77797  | -0.89680         | -0.76484 |

|   |          |          |          |
|---|----------|----------|----------|
| C | 6.17067  | -0.93313 | -0.68827 |
| C | 6.79917  | -0.65864 | 0.54794  |
| C | 5.98303  | -0.32144 | 1.65274  |
| C | 4.59720  | -0.31023 | 1.49379  |
| H | 4.27255  | -1.04682 | -1.71939 |
| H | 3.94818  | -0.00517 | 2.31577  |
| H | -2.27082 | 0.44912  | 1.71318  |
| N | 4.01337  | -0.63439 | 0.31822  |
| C | 2.36965  | 4.40398  | -1.12999 |
| N | 2.70422  | 5.48546  | -1.39855 |
| C | 4.29346  | 2.15366  | -0.42538 |
| N | 5.45407  | 2.23126  | -0.37881 |
| C | 3.44891  | -3.44060 | -1.00476 |
| N | 4.42119  | -3.99038 | -0.67550 |
| C | 1.27608  | -4.45959 | -2.88781 |
| N | 1.32049  | -5.51979 | -3.36490 |
| C | 3.17816  | -2.53185 | 2.65993  |
| N | 4.16977  | -3.13536 | 2.75172  |
| C | 0.73547  | -2.66677 | 4.48141  |
| N | 0.68610  | -3.39362 | 5.38851  |
| C | 8.22237  | -0.69288 | 0.67007  |
| N | 9.37957  | -0.72041 | 0.76928  |
| C | 6.54530  | 0.01498  | 2.92550  |
| N | 6.99497  | 0.28635  | 3.96116  |
| C | 6.92913  | -1.23463 | -1.86413 |
| N | 7.53814  | -1.48246 | -2.82126 |
| H | -3.12499 | -0.63107 | 0.07663  |
| C | -4.31844 | -0.22608 | 0.03494  |
| C | -4.76537 | -0.86024 | -1.23025 |
| C | -5.00424 | -0.72398 | 1.25115  |
| H | -4.23562 | 0.87013  | -0.01698 |
| C | -5.11950 | -2.22962 | -1.19557 |
| C | -4.81250 | -0.16252 | -2.44944 |
| C | -5.34672 | -2.09544 | 1.30737  |
| C | -5.31328 | 0.11016  | 2.34002  |
| C | -5.53303 | -2.86287 | -2.37238 |
| C | -4.99369 | -2.96390 | 0.12091  |
| C | -5.21821 | -0.80637 | -3.62159 |
| H | -4.52793 | 0.89502  | -2.47334 |
| C | -5.96822 | -2.60420 | 2.45312  |
| C | -5.93028 | -0.40740 | 3.48235  |
| H | -5.06890 | 1.17607  | 2.28366  |
| C | -5.58150 | -2.15953 | -3.58371 |
| H | -5.81319 | -3.92168 | -2.34426 |
| H | -5.58683 | -3.89277 | 0.11752  |
| H | -3.93224 | -3.27176 | 0.23012  |
| H | -5.25515 | -0.25291 | -4.56548 |
| H | -6.23283 | -3.66658 | 2.49531  |
| C | -6.25294 | -1.77017 | 3.54288  |
| H | -6.16439 | 0.25200  | 4.32429  |
| H | -5.90492 | -2.66811 | -4.49764 |
| H | -6.73644 | -2.18215 | 4.43445  |

**LiCo<sup>III</sup>O + DHA (S=1)**

109

dha\_ts\_u2.out Energy: -2666783.2393980

|   |         |          |          |
|---|---------|----------|----------|
| C | 0.55726 | -1.17731 | -1.36233 |
|---|---------|----------|----------|

|    |          |          |          |
|----|----------|----------|----------|
| N  | 0.24121  | -2.11867 | -2.29088 |
| C  | 1.22864  | -3.09774 | -2.31312 |
| C  | 2.22159  | -2.69311 | -1.43835 |
| N  | 1.82652  | -1.46308 | -0.92419 |
| B  | 2.41583  | -0.54770 | 0.18824  |
| N  | 2.10615  | 0.93734  | -0.14933 |
| C  | 0.79213  | 1.26712  | -0.30802 |
| N  | 0.72746  | 2.59000  | -0.60027 |
| C  | 2.01734  | 3.11474  | -0.62860 |
| C  | 2.88603  | 2.07555  | -0.34411 |
| N  | 1.66695  | -0.94803 | 1.49268  |
| C  | 0.36015  | -0.54524 | 1.61227  |
| N  | -0.09580 | -1.03696 | 2.79491  |
| C  | 0.85578  | -1.89326 | 3.33854  |
| C  | 1.96237  | -1.84996 | 2.50889  |
| Co | -0.50993 | -0.09757 | -0.10111 |
| O  | -1.83245 | -1.26183 | 0.05966  |
| C  | -0.96824 | -2.08505 | -3.20721 |
| C  | -0.50675 | -2.39588 | -4.64194 |
| C  | -1.98320 | -3.11014 | -2.68915 |
| C  | -1.55425 | -0.67024 | -3.19708 |
| C  | -0.54456 | 3.36314  | -0.85760 |
| C  | -0.65903 | 4.47572  | 0.19593  |
| C  | -0.49391 | 3.91759  | -2.28983 |
| C  | -1.73716 | 2.40939  | -0.72266 |
| C  | -1.41189 | -0.67070 | 3.45648  |
| C  | -1.95587 | 0.60179  | 2.80048  |
| C  | -2.37729 | -1.84706 | 3.27263  |
| C  | -1.14662 | -0.36149 | 4.94045  |
| H  | -1.36863 | -2.26505 | -5.31446 |
| H  | 0.28819  | -1.70175 | -4.96151 |
| H  | -1.57810 | -4.13467 | -2.73340 |
| H  | -2.89287 | -3.07173 | -3.30746 |
| H  | -2.25112 | -2.86049 | -1.65190 |
| H  | -0.78912 | 0.08535  | -3.43691 |
| H  | -2.01297 | -0.44213 | -2.22886 |
| H  | -2.34762 | -0.62171 | -3.95574 |
| H  | 0.15344  | 5.21348  | 0.11641  |
| H  | -0.65258 | 4.04823  | 1.21193  |
| H  | -1.60950 | 5.01250  | 0.04963  |
| H  | 0.33005  | 4.63272  | -2.43314 |
| H  | -1.43460 | 4.44905  | -2.50312 |
| H  | -1.82743 | 2.00909  | 0.29992  |
| H  | -2.66298 | 2.96975  | -0.92445 |
| H  | -1.69440 | 1.59534  | -1.46467 |
| H  | -2.83719 | 0.93075  | 3.36832  |
| H  | -1.20822 | 1.41107  | 2.80807  |
| H  | -3.35844 | -1.58759 | 3.69847  |
| H  | -2.50142 | -2.04807 | 2.19826  |
| H  | -0.38110 | 0.42444  | 5.05087  |
| H  | -0.84165 | -1.24263 | 5.52072  |
| H  | -2.08380 | 0.00618  | 5.38614  |
| H  | -0.15454 | -3.42798 | -4.77174 |
| H  | -2.00815 | -2.75284 | 3.78156  |
| H  | -0.38364 | 3.09758  | -3.01831 |
| C  | 4.74999  | -0.89059 | -0.78131 |
| C  | 6.14260  | -0.94702 | -0.71820 |
| C  | 6.78460  | -0.72798 | 0.52243  |
| C  | 5.98189  | -0.42270 | 1.64589  |

|   |          |          |          |
|---|----------|----------|----------|
| C | 4.59486  | -0.38748 | 1.49920  |
| H | 4.23529  | -0.99987 | -1.73656 |
| H | 3.95694  | -0.10329 | 2.33715  |
| H | -2.28233 | 0.40571  | 1.77338  |
| N | 3.99742  | -0.66005 | 0.31765  |
| C | 2.38214  | 4.45842  | -0.89843 |
| N | 2.71371  | 5.55210  | -1.11653 |
| C | 4.29778  | 2.16663  | -0.26946 |
| N | 5.45846  | 2.22979  | -0.20602 |
| C | 3.38659  | -3.41306 | -1.07354 |
| N | 4.34894  | -3.98685 | -0.75617 |
| C | 1.21053  | -4.33090 | -3.01540 |
| N | 1.23677  | -5.36857 | -3.54093 |
| C | 3.14704  | -2.61941 | 2.62124  |
| N | 4.12916  | -3.24101 | 2.69234  |
| C | 0.71754  | -2.73528 | 4.47259  |
| N | 0.65136  | -3.46960 | 5.37261  |
| C | 8.20809  | -0.78614 | 0.63156  |
| N | 9.36552  | -0.83333 | 0.72020  |
| C | 6.55873  | -0.14001 | 2.92528  |
| N | 7.02003  | 0.08813  | 3.96624  |
| C | 6.88706  | -1.21497 | -1.91115 |
| N | 7.48458  | -1.43551 | -2.88212 |
| H | -3.04869 | -0.76259 | -0.12450 |
| C | -4.24764 | -0.36770 | -0.28578 |
| C | -4.74791 | -1.17053 | -1.42911 |
| C | -4.91137 | -0.66906 | 1.00675  |
| H | -4.15278 | 0.70759  | -0.50042 |
| C | -5.11972 | -2.51414 | -1.18684 |
| C | -4.85940 | -0.64660 | -2.72855 |
| C | -5.28313 | -2.00913 | 1.26763  |
| C | -5.17628 | 0.32084  | 1.96873  |
| C | -5.59444 | -3.29924 | -2.24290 |
| C | -4.96127 | -3.05024 | 0.21867  |
| C | -5.32633 | -1.44093 | -3.77958 |
| H | -4.57652 | 0.39558  | -2.91111 |
| C | -5.90877 | -2.32810 | 2.47750  |
| C | -5.79444 | -0.00816 | 3.17838  |
| H | -4.89384 | 1.35827  | 1.76042  |
| C | -5.69440 | -2.77144 | -3.53749 |
| H | -5.88700 | -4.33776 | -2.05259 |
| H | -5.56042 | -3.96315 | 0.36683  |
| H | -3.89987 | -3.34766 | 0.35047  |
| H | -5.40942 | -1.02127 | -4.78732 |
| H | -6.20064 | -3.36537 | 2.67553  |
| C | -6.16103 | -1.33631 | 3.43522  |
| H | -5.99622 | 0.77194  | 3.91953  |
| H | -6.06494 | -3.39743 | -4.35557 |
| H | -6.64909 | -1.59984 | 4.37902  |

**LiCo<sup>III</sup>O + DHA (S=2)**

109

dha\_ts\_u4.out Energy: -2666775.3845231

|   |         |          |          |
|---|---------|----------|----------|
| C | 0.44316 | -1.30565 | -1.14159 |
| N | 0.05440 | -2.42947 | -1.79188 |
| C | 1.11725 | -3.32059 | -1.85001 |
| C | 2.19356 | -2.70549 | -1.22949 |

|    |          |          |          |
|----|----------|----------|----------|
| N  | 1.77116  | -1.43454 | -0.84183 |
| B  | 2.39484  | -0.37380 | 0.14460  |
| N  | 2.16041  | 1.11666  | -0.31432 |
| C  | 0.90102  | 1.60957  | -0.55586 |
| N  | 1.02040  | 2.90971  | -0.90187 |
| C  | 2.35903  | 3.27883  | -0.86305 |
| C  | 3.07843  | 2.15848  | -0.49463 |
| N  | 1.68427  | -0.67148 | 1.50178  |
| C  | 0.40091  | -0.22550 | 1.67820  |
| N  | -0.04723 | -0.75482 | 2.84702  |
| C  | 0.89489  | -1.64597 | 3.34767  |
| C  | 1.97711  | -1.61643 | 2.48511  |
| Co | -0.55281 | 0.24173  | -0.18482 |
| O  | -2.25049 | 0.34716  | 0.15740  |
| C  | -1.38555 | -2.64765 | -2.24755 |
| C  | -1.47339 | -3.81832 | -3.23055 |
| C  | -2.22095 | -2.93431 | -0.99217 |
| C  | -1.86055 | -1.36829 | -2.94834 |
| C  | -0.11152 | 3.85341  | -1.27400 |
| C  | -0.15550 | 4.97345  | -0.22209 |
| C  | 0.16255  | 4.39005  | -2.68894 |
| C  | -1.44222 | 3.10187  | -1.27103 |
| C  | -1.40277 | -0.41370 | 3.46221  |
| C  | -1.69359 | 1.06677  | 3.17523  |
| C  | -2.44926 | -1.33119 | 2.81747  |
| C  | -1.35690 | -0.61763 | 4.98283  |
| H  | -2.50389 | -3.84824 | -3.61654 |
| H  | -0.79742 | -3.68940 | -4.09136 |
| H  | -1.84828 | -3.82524 | -0.46105 |
| H  | -3.26479 | -3.11279 | -1.29424 |
| H  | -2.20947 | -2.06741 | -0.31517 |
| H  | -1.18375 | -1.09016 | -3.77209 |
| H  | -1.94982 | -0.52930 | -2.24509 |
| H  | -2.86539 | -1.54391 | -3.35886 |
| H  | 0.76509  | 5.57629  | -0.20519 |
| H  | -0.32332 | 4.55132  | 0.78215  |
| H  | -0.99081 | 5.65144  | -0.45747 |
| H  | 1.08077  | 4.99223  | -2.74996 |
| H  | -0.67490 | 5.03899  | -2.98920 |
| H  | -1.70226 | 2.70791  | -0.27939 |
| H  | -2.22946 | 3.81150  | -1.56959 |
| H  | -1.44973 | 2.27170  | -1.99381 |
| H  | -2.66260 | 1.32281  | 3.63298  |
| H  | -0.91496 | 1.71061  | 3.61683  |
| H  | -3.43557 | -1.12370 | 3.26252  |
| H  | -2.51435 | -1.12176 | 1.74000  |
| H  | -0.49489 | -0.10439 | 5.44049  |
| H  | -1.34871 | -1.67644 | 5.27487  |
| H  | -2.27236 | -0.17651 | 5.40618  |
| H  | -1.28057 | -4.78915 | -2.75278 |
| H  | -2.20404 | -2.39295 | 2.98669  |
| H  | 0.23295  | 3.55951  | -3.41025 |
| C  | 4.68331  | -0.79729 | -0.88464 |
| C  | 6.07181  | -0.92890 | -0.86702 |
| C  | 6.76219  | -0.76638 | 0.35591  |
| C  | 6.01260  | -0.43746 | 1.50904  |
| C  | 4.62620  | -0.31982 | 1.40674  |
| H  | 4.13108  | -0.87090 | -1.82306 |
| H  | 4.03271  | -0.00536 | 2.26579  |

|   |          |          |          |
|---|----------|----------|----------|
| H | -1.77601 | 1.26008  | 2.09897  |
| N | 3.97777  | -0.54180 | 0.24124  |
| C | 2.91403  | 4.55830  | -1.12799 |
| N | 3.41180  | 5.59016  | -1.32971 |
| C | 4.48749  | 2.16206  | -0.34134 |
| N | 5.64447  | 2.21361  | -0.22489 |
| C | 3.45383  | -3.31086 | -0.99482 |
| N | 4.48208  | -3.82028 | -0.79778 |
| C | 1.17494  | -4.62984 | -2.39878 |
| N | 1.32224  | -5.70700 | -2.81162 |
| C | 3.12352  | -2.44682 | 2.54672  |
| N | 4.06605  | -3.13059 | 2.57300  |
| C | 0.81427  | -2.50256 | 4.47798  |
| N | 0.82813  | -3.25317 | 5.36641  |
| C | 8.18320  | -0.89957 | 0.41850  |
| N | 9.33893  | -1.00665 | 0.46894  |
| C | 6.64372  | -0.20783 | 2.77307  |
| N | 7.14940  | -0.02317 | 3.80197  |
| C | 6.76261  | -1.22189 | -2.08562 |
| N | 7.31672  | -1.46428 | -3.07690 |
| H | -3.33530 | 0.83466  | -0.57488 |
| C | -4.46179 | 1.18072  | -0.89475 |
| C | -4.97516 | 0.11613  | -1.79112 |
| C | -5.06999 | 1.24095  | 0.45956  |
| H | -4.34585 | 2.16147  | -1.38081 |
| C | -5.42121 | -1.09630 | -1.21584 |
| C | -4.98628 | 0.26269  | -3.19032 |
| C | -5.50968 | 0.03714  | 1.05535  |
| C | -5.11328 | 2.43621  | 1.19980  |
| C | -5.85315 | -2.13447 | -2.05223 |
| C | -5.37226 | -1.25778 | 0.28661  |
| C | -5.41962 | -0.77842 | -4.01516 |
| H | -4.64266 | 1.20519  | -3.63072 |
| C | -5.99750 | 0.05949  | 2.36875  |
| C | -5.59173 | 2.44603  | 2.51238  |
| H | -4.75902 | 3.36372  | 0.73620  |
| C | -5.84895 | -1.98524 | -3.44510 |
| H | -6.19873 | -3.07407 | -1.60642 |
| H | -6.12106 | -1.99440 | 0.62379  |
| H | -4.38653 | -1.69396 | 0.54854  |
| H | -5.42160 | -0.65163 | -5.10257 |
| H | -6.34277 | -0.87329 | 2.82898  |
| C | -6.03695 | 1.25311  | 3.09997  |
| H | -5.62118 | 3.38287  | 3.07829  |
| H | -6.18906 | -2.80661 | -4.08394 |
| H | -6.41679 | 1.25306  | 4.12680  |

**LaCo<sup>III</sup>O + fluorene (S=0, closed-shell)**

106

fluorene\_ts\_u0\_closed.out Energy: -2642111.5257160

|   |         |          |          |
|---|---------|----------|----------|
| C | 0.67670 | -0.81460 | -1.58031 |
| N | 0.34443 | -1.46567 | -2.73145 |
| C | 1.27662 | -2.47334 | -2.96353 |
| C | 2.24592 | -2.37153 | -1.98253 |
| N | 1.89870 | -1.28781 | -1.18626 |
| B | 2.44374 | -0.70691 | 0.14270  |
| N | 2.27639 | 0.84112  | 0.11759  |

|    |          |          |          |
|----|----------|----------|----------|
| C  | 1.02549  | 1.34054  | -0.11626 |
| N  | 1.10776  | 2.69610  | -0.05672 |
| C  | 2.42356  | 3.06066  | 0.21893  |
| C  | 3.15877  | 1.89537  | 0.32759  |
| N  | 1.50453  | -1.29585 | 1.24043  |
| C  | 0.23661  | -0.78417 | 1.28930  |
| N  | -0.39437 | -1.35936 | 2.34936  |
| C  | 0.41043  | -2.38476 | 2.84130  |
| C  | 1.59944  | -2.35326 | 2.13492  |
| Co | -0.39979 | 0.08243  | -0.30948 |
| O  | -1.96995 | -0.59352 | -0.19831 |
| C  | -0.84479 | -1.16832 | -3.63050 |
| C  | -0.38543 | -1.21330 | -5.09804 |
| C  | -1.91470 | -2.22304 | -3.32491 |
| C  | -1.34884 | 0.25139  | -3.34629 |
| C  | -0.02244 | 3.69063  | -0.23600 |
| C  | -0.17534 | 4.47971  | 1.07497  |
| C  | 0.32146  | 4.59518  | -1.43090 |
| C  | -1.32776 | 2.95293  | -0.52901 |
| C  | -1.68603 | -0.90042 | 3.03484  |
| C  | -2.05692 | 0.51668  | 2.57928  |
| C  | -2.78633 | -1.90463 | 2.68252  |
| C  | -1.41379 | -0.84017 | 4.55033  |
| H  | -1.22168 | -0.87419 | -5.72846 |
| H  | 0.46758  | -0.53547 | -5.26544 |
| H  | -1.56294 | -3.23671 | -3.57684 |
| H  | -2.81738 | -2.01907 | -3.92185 |
| H  | -2.17981 | -2.19050 | -2.25829 |
| H  | -0.54086 | 0.99155  | -3.46055 |
| H  | -1.79305 | 0.34090  | -2.34746 |
| H  | -2.13899 | 0.49009  | -4.07445 |
| H  | 0.71528  | 5.07767  | 1.31844  |
| H  | -0.38514 | 3.79601  | 1.91376  |
| H  | -1.02313 | 5.17536  | 0.97520  |
| H  | 1.22900  | 5.19400  | -1.26525 |
| H  | -0.51034 | 5.29742  | -1.59703 |
| H  | -1.65304 | 2.31320  | 0.30327  |
| H  | -2.11620 | 3.70708  | -0.67169 |
| H  | -1.27194 | 2.36627  | -1.45685 |
| H  | -2.86750 | 0.87870  | 3.22929  |
| H  | -1.20035 | 1.20473  | 2.67959  |
| H  | -3.73539 | -1.57667 | 3.13348  |
| H  | -2.91614 | -1.93884 | 1.59220  |
| H  | -0.55723 | -0.18221 | 4.77197  |
| H  | -1.23929 | -1.82284 | 5.00773  |
| H  | -2.30530 | -0.41728 | 5.03793  |
| H  | -0.11737 | -2.22079 | -5.44097 |
| H  | -2.55722 | -2.91362 | 3.06274  |
| H  | 0.45474  | 3.99254  | -2.34428 |
| C  | 4.81984  | -1.01414 | -0.69255 |
| C  | 6.19119  | -1.21443 | -0.54640 |
| C  | 6.72878  | -1.38309 | 0.75281  |
| C  | 5.84509  | -1.30185 | 1.85497  |
| C  | 4.48547  | -1.09710 | 1.62374  |
| H  | 4.39190  | -0.82019 | -1.67682 |
| H  | 3.79993  | -0.96430 | 2.46050  |
| H  | -2.42426 | 0.53160  | 1.54887  |
| N  | 3.98155  | -1.00319 | 0.37137  |
| C  | 2.94014  | 4.37377  | 0.36831  |

|   |          |          |          |
|---|----------|----------|----------|
| N | 3.41161  | 5.42892  | 0.50151  |
| C | 4.54698  | 1.81888  | 0.60122  |
| N | 5.68714  | 1.75954  | 0.82761  |
| C | 3.34586  | -3.24085 | -1.77475 |
| N | 4.25273  | -3.94462 | -1.58075 |
| C | 1.22615  | -3.49602 | -3.94624 |
| N | 1.23270  | -4.38210 | -4.69994 |
| C | 2.67567  | -3.27096 | 2.22869  |
| N | 3.56698  | -4.01795 | 2.28256  |
| C | 0.06582  | -3.37030 | 3.80323  |
| N | -0.16432 | -4.22895 | 4.55363  |
| C | 8.12711  | -1.59506 | 0.94785  |
| N | 9.26540  | -1.76703 | 1.10688  |
| C | 6.31558  | -1.40963 | 3.20265  |
| N | 6.69005  | -1.49899 | 4.29823  |
| C | 7.02311  | -1.23320 | -1.71157 |
| N | 7.69178  | -1.25106 | -2.66085 |
| H | -2.99412 | -0.63790 | -0.80486 |
| C | -4.29721 | -0.59973 | -1.28056 |
| H | -4.19575 | -0.39940 | -2.35344 |
| C | -4.84334 | -1.86437 | -0.76742 |
| C | -4.73104 | 0.43265  | -0.33343 |
| C | -4.80877 | -3.16555 | -1.29011 |
| C | -5.42930 | -1.62966 | 0.51411  |
| C | -4.51977 | 1.81764  | -0.33607 |
| C | -5.34105 | -0.19552 | 0.79417  |
| C | -5.34089 | -4.21922 | -0.53449 |
| H | -4.37495 | -3.35973 | -2.27571 |
| C | -5.94929 | -2.68871 | 1.26444  |
| C | -4.90447 | 2.56860  | 0.78209  |
| H | -4.05508 | 2.30139  | -1.20067 |
| C | -5.71443 | 0.56058  | 1.90970  |
| C | -5.90046 | -3.98624 | 0.73462  |
| H | -5.32121 | -5.23725 | -0.93749 |
| H | -6.39143 | -2.50912 | 2.25022  |
| C | -5.49061 | 1.94562  | 1.89901  |
| H | -4.74342 | 3.65184  | 0.78953  |
| H | -6.17292 | 0.08098  | 2.78106  |
| H | -6.30685 | -4.82435 | 1.31003  |
| H | -5.77731 | 2.54853  | 2.76675  |

#### **L<sub>4</sub>Co<sup>III</sup>O + fluorene (S=1)**

106

|                    |                          |          |          |
|--------------------|--------------------------|----------|----------|
| fluorene_ts_u2.out | Energy: -2642118.3366535 |          |          |
| C                  | 0.66769                  | -0.74976 | -1.66203 |
| N                  | 0.35337                  | -1.44042 | -2.78680 |
| C                  | 1.23687                  | -2.50576 | -2.93598 |
| C                  | 2.16112                  | -2.41346 | -1.91008 |
| N                  | 1.83986                  | -1.27245 | -1.18238 |
| B                  | 2.39322                  | -0.67043 | 0.14191  |
| N                  | 2.25816                  | 0.87909  | 0.09428  |
| C                  | 1.00831                  | 1.40646  | -0.08894 |
| N                  | 1.13287                  | 2.75859  | -0.08884 |
| C                  | 2.47148                  | 3.09790  | 0.09183  |
| C                  | 3.17926                  | 1.91681  | 0.20858  |
| N                  | 1.49091                  | -1.22321 | 1.28585  |
| C                  | 0.23071                  | -0.69240 | 1.38620  |



|    |          |          |          |
|----|----------|----------|----------|
| N  | -0.38572 | -1.31667 | 2.41999  |
| C  | 0.42130  | -2.35246 | 2.87988  |
| C  | 1.59631  | -2.30826 | 2.14971  |
| Co | -0.42192 | 0.13081  | -0.28443 |
| O  | -1.68218 | -1.10614 | -0.42547 |
| C  | -0.77223 | -1.11057 | -3.74843 |
| C  | -0.19342 | -1.06545 | -5.17336 |
| C  | -1.85293 | -2.18865 | -3.58766 |
| C  | -1.33364 | 0.27698  | -3.41771 |
| C  | 0.01621  | 3.76377  | -0.25643 |
| C  | -0.03682 | 4.64344  | 1.00378  |
| C  | 0.28929  | 4.57965  | -1.53022 |
| C  | -1.31415 | 3.02670  | -0.40285 |
| C  | -1.73066 | -0.94034 | 3.01646  |
| C  | -2.17714 | 0.40898  | 2.44835  |
| C  | -2.73232 | -2.04165 | 2.65016  |
| C  | -1.55575 | -0.78934 | 4.53778  |
| H  | -0.99359 | -0.75876 | -5.86482 |
| H  | 0.62348  | -0.32823 | -5.24116 |
| H  | -1.49141 | -3.18074 | -3.90217 |
| H  | -2.72382 | -1.93405 | -4.21239 |
| H  | -2.15875 | -2.23152 | -2.53218 |
| H  | -0.54413 | 1.04522  | -3.42042 |
| H  | -1.84520 | 0.28278  | -2.44800 |
| H  | -2.07500 | 0.54006  | -4.18760 |
| H  | 0.87712  | 5.23886  | 1.14507  |
| H  | -0.19922 | 4.02291  | 1.90030  |
| H  | -0.87810 | 5.34812  | 0.91213  |
| H  | 1.21764  | 5.16656  | -1.46563 |
| H  | -0.53938 | 5.28798  | -1.68642 |
| H  | -1.56246 | 2.43790  | 0.49270  |
| H  | -2.11043 | 3.77730  | -0.51788 |
| H  | -1.34154 | 2.39247  | -1.30319 |
| H  | -3.11153 | 0.70527  | 2.94767  |
| H  | -1.42195 | 1.19131  | 2.62599  |
| H  | -3.72776 | -1.77101 | 3.03267  |
| H  | -2.79057 | -2.13371 | 1.55601  |
| H  | -0.77861 | -0.04307 | 4.77163  |
| H  | -1.30690 | -1.73353 | 5.04206  |
| H  | -2.50928 | -0.43800 | 4.96185  |
| H  | 0.17639  | -2.03997 | -5.52102 |
| H  | -2.45311 | -3.01372 | 3.08755  |
| H  | 0.34940  | 3.91500  | -2.40762 |
| C  | 4.76448  | -1.07253 | -0.71181 |
| C  | 6.13492  | -1.28864 | -0.56664 |
| C  | 6.67995  | -1.40225 | 0.73360  |
| C  | 5.80881  | -1.25507 | 1.83746  |
| C  | 4.45108  | -1.03224 | 1.60627  |
| H  | 4.33068  | -0.92932 | -1.70210 |
| H  | 3.77246  | -0.84956 | 2.43982  |
| H  | -2.39798 | 0.33760  | 1.37737  |
| N  | 3.93914  | -0.98719 | 0.35630  |
| C  | 3.02691  | 4.40219  | 0.14439  |
| N  | 3.52475  | 5.45270  | 0.19147  |
| C  | 4.57902  | 1.81714  | 0.40413  |
| N  | 5.72968  | 1.74244  | 0.56331  |
| C  | 3.19980  | -3.32861 | -1.60538 |
| N  | 4.05557  | -4.06885 | -1.33058 |
| C  | 1.18186  | -3.54331 | -3.90243 |

|   |          |          |          |
|---|----------|----------|----------|
| N | 1.16610  | -4.42812 | -4.65770 |
| C | 2.67694  | -3.22288 | 2.21409  |
| N | 3.57397  | -3.96456 | 2.24803  |
| C | 0.10052  | -3.32579 | 3.86153  |
| N | -0.12132 | -4.16007 | 4.64145  |
| C | 8.07773  | -1.62635 | 0.92717  |
| N | 9.21453  | -1.80685 | 1.08479  |
| C | 6.28796  | -1.31265 | 3.18512  |
| N | 6.66915  | -1.36141 | 4.28090  |
| C | 6.95674  | -1.37448 | -1.73582 |
| N | 7.61700  | -1.44431 | -2.68850 |
| H | -2.89330 | -0.81857 | -0.73441 |
| C | -4.14137 | -0.65289 | -1.02779 |
| H | -4.09214 | -0.45167 | -2.10721 |
| C | -4.75070 | -1.91270 | -0.54370 |
| C | -4.64751 | 0.39259  | -0.11214 |
| C | -4.65843 | -3.21658 | -1.04338 |
| C | -5.45234 | -1.65900 | 0.66874  |
| C | -4.45069 | 1.77569  | -0.12297 |
| C | -5.37741 | -0.22002 | 0.94491  |
| C | -5.26820 | -4.26122 | -0.33352 |
| H | -4.11813 | -3.42001 | -1.97298 |
| C | -6.05487 | -2.70494 | 1.37352  |
| C | -4.95434 | 2.54436  | 0.93669  |
| H | -3.91213 | 2.24815  | -0.94901 |
| C | -5.87419 | 0.54958  | 2.00127  |
| C | -5.95704 | -4.00875 | 0.86509  |
| H | -5.20663 | -5.28501 | -0.71661 |
| H | -6.59345 | -2.51288 | 2.30736  |
| C | -5.65147 | 1.93548  | 1.99391  |
| H | -4.80255 | 3.62874  | 0.94097  |
| H | -6.42968 | 0.08199  | 2.82087  |
| H | -6.42384 | -4.83832 | 1.40598  |
| H | -6.03264 | 2.54999  | 2.81588  |

#### L<sub>4</sub>Co<sup>III</sup>O + fluorene (S=2)

106

|                    |          |                  |          |
|--------------------|----------|------------------|----------|
| fluorene_ts_u4.out | Energy:  | -2642110.2760622 |          |
| C                  | 0.68186  | -0.72986         | -1.66122 |
| N                  | 0.37884  | -1.40165         | -2.79417 |
| C                  | 1.28137  | -2.45166         | -2.94685 |
| C                  | 2.18234  | -2.36679         | -1.89875 |
| N                  | 1.83003  | -1.25030         | -1.15511 |
| B                  | 2.41887  | -0.67985         | 0.18811  |
| N                  | 2.23390  | 0.88972          | 0.15481  |
| C                  | 1.01141  | 1.44000          | -0.04772 |
| N                  | 1.14208  | 2.78655          | -0.06706 |
| C                  | 2.48236  | 3.10242          | 0.13956  |
| C                  | 3.16665  | 1.90641          | 0.27745  |
| N                  | 1.46108  | -1.23522         | 1.30154  |
| C                  | 0.21494  | -0.70566         | 1.43405  |
| N                  | -0.41198 | -1.35213         | 2.44198  |
| C                  | 0.40018  | -2.39746         | 2.87502  |
| C                  | 1.57078  | -2.33604         | 2.13858  |
| Co                 | -0.47651 | 0.17523          | -0.24726 |
| O                  | -1.65470 | -1.06105         | -0.37139 |

|   |          |          |          |
|---|----------|----------|----------|
| C | -0.75468 | -1.09173 | -3.75723 |
| C | -0.17861 | -1.02953 | -5.18227 |
| C | -1.80916 | -2.19652 | -3.59990 |
| C | -1.34476 | 0.28266  | -3.42732 |
| C | 0.05727  | 3.81920  | -0.30424 |
| C | -0.02608 | 4.72511  | 0.93507  |
| C | 0.41529  | 4.59667  | -1.58169 |
| C | -1.28635 | 3.12101  | -0.50139 |
| C | -1.75940 | -1.00372 | 3.05755  |
| C | -2.24449 | 0.34078  | 2.51134  |
| C | -2.74501 | -2.12288 | 2.69819  |
| C | -1.56268 | -0.86069 | 4.57707  |
| H | -0.98641 | -0.73483 | -5.86987 |
| H | 0.62338  | -0.27636 | -5.24725 |
| H | -1.42304 | -3.17873 | -3.91440 |
| H | -2.68369 | -1.96175 | -4.22685 |
| H | -2.12821 | -2.26429 | -2.54900 |
| H | -0.57090 | 1.06665  | -3.42535 |
| H | -1.87237 | 0.28700  | -2.46590 |
| H | -2.08666 | 0.53484  | -4.19970 |
| H | 0.89538  | 5.30129  | 1.10234  |
| H | -0.24202 | 4.12858  | 1.83641  |
| H | -0.84476 | 5.44739  | 0.79144  |
| H | 1.35819  | 5.15467  | -1.48755 |
| H | -0.38149 | 5.32833  | -1.78708 |
| H | -1.62330 | 2.60174  | 0.40667  |
| H | -2.04505 | 3.89129  | -0.70795 |
| H | -1.28623 | 2.45031  | -1.37422 |
| H | -3.14932 | 0.63330  | 3.06381  |
| H | -1.48965 | 1.13210  | 2.64507  |
| H | -3.74182 | -1.86563 | 3.08639  |
| H | -2.81638 | -2.23113 | 1.60558  |
| H | -0.80993 | -0.08789 | 4.80274  |
| H | -1.26841 | -1.79904 | 5.06679  |
| H | -2.52088 | -0.55033 | 5.02176  |
| H | 0.20835  | -1.99485 | -5.53501 |
| H | -2.45166 | -3.08949 | 3.13642  |
| H | 0.49147  | 3.91211  | -2.44222 |
| C | 4.76757  | -1.02697 | -0.68419 |
| C | 6.10860  | -1.27030 | -0.53696 |
| C | 6.68497  | -1.48007 | 0.77232  |
| C | 5.77467  | -1.30409 | 1.88289  |
| C | 4.44302  | -1.05830 | 1.66883  |
| H | 4.35071  | -0.80887 | -1.66774 |
| H | 3.77637  | -0.86091 | 2.50822  |
| H | -2.53720 | 0.27374  | 1.45732  |
| N | 3.88941  | -1.00660 | 0.39507  |
| C | 3.05701  | 4.39798  | 0.20180  |
| N | 3.57284  | 5.43887  | 0.25999  |
| C | 4.56282  | 1.80089  | 0.50947  |
| N | 5.70958  | 1.79378  | 0.70174  |
| C | 3.20846  | -3.29846 | -1.59131 |
| N | 4.01906  | -4.09633 | -1.34885 |
| C | 1.25522  | -3.47061 | -3.93396 |
| N | 1.26281  | -4.34272 | -4.70357 |
| C | 2.63469  | -3.27520 | 2.16861  |
| N | 3.47591  | -4.07792 | 2.19381  |
| C | 0.08124  | -3.39070 | 3.83695  |
| N | -0.13956 | -4.24151 | 4.59872  |

|   |          |          |          |
|---|----------|----------|----------|
| C | 8.04809  | -1.77269 | 0.95561  |
| N | 9.18269  | -2.01697 | 1.10750  |
| C | 6.24791  | -1.35863 | 3.23248  |
| N | 6.63392  | -1.40810 | 4.32856  |
| C | 6.92876  | -1.28880 | -1.71010 |
| N | 7.59541  | -1.30795 | -2.66296 |
| H | -2.96801 | -0.80226 | -0.79712 |
| C | -4.16170 | -0.68690 | -1.06596 |
| H | -4.13924 | -0.51314 | -2.15257 |
| C | -4.76314 | -1.93673 | -0.54240 |
| C | -4.65794 | 0.38568  | -0.16833 |
| C | -4.66421 | -3.25078 | -1.01312 |
| C | -5.46538 | -1.64925 | 0.66098  |
| C | -4.43637 | 1.76393  | -0.20917 |
| C | -5.38888 | -0.20033 | 0.90062  |
| C | -5.27627 | -4.27810 | -0.27998 |
| H | -4.11905 | -3.47487 | -1.93498 |
| C | -6.07242 | -2.67421 | 1.38561  |
| C | -4.93337 | 2.56053  | 0.83432  |
| H | -3.88518 | 2.21189  | -1.04055 |
| C | -5.88287 | 0.59483  | 1.93521  |
| C | -5.96958 | -3.99270 | 0.90677  |
| H | -5.21228 | -5.31105 | -0.63530 |
| H | -6.61904 | -2.46200 | 2.30973  |
| C | -5.64267 | 1.98030  | 1.89703  |
| H | -4.76580 | 3.64191  | 0.81965  |
| H | -6.44599 | 0.15324  | 2.76329  |
| H | -6.43868 | -4.80760 | 1.46700  |
| H | -6.01962 | 2.61495  | 2.70516  |

**LaCo<sup>III</sup>O + MeCN (S=0, open-shell)**

89  
mecn\_percn\_u0\_open.out      Energy: -2410837.3826015

|    |          |          |          |
|----|----------|----------|----------|
| C  | 0.85223  | -0.87891 | -1.59140 |
| N  | 0.56495  | -1.60754 | -2.70165 |
| C  | 1.47270  | -2.65716 | -2.81168 |
| C  | 2.38628  | -2.51443 | -1.78277 |
| N  | 2.03293  | -1.36220 | -1.08917 |
| B  | 2.56083  | -0.72509 | 0.22890  |
| N  | 2.39723  | 0.82033  | 0.15362  |
| C  | 1.14028  | 1.31203  | -0.06451 |
| N  | 1.22401  | 2.66738  | -0.06900 |
| C  | 2.54672  | 3.04505  | 0.14877  |
| C  | 3.28505  | 1.88465  | 0.28857  |
| N  | 1.65121  | -1.28241 | 1.36632  |
| C  | 0.37926  | -0.77853 | 1.43620  |
| N  | -0.24683 | -1.41317 | 2.45919  |
| C  | 0.57242  | -2.42939 | 2.94094  |
| C  | 1.76255  | -2.36051 | 2.23767  |
| Co | -0.25603 | 0.03560  | -0.25814 |
| O  | -1.60287 | -1.17541 | -0.38988 |
| C  | -0.53922 | -1.31807 | -3.70297 |
| C  | 0.06897  | -1.34052 | -5.11646 |
| C  | -1.63280 | -2.37951 | -3.52049 |
| C  | -1.09471 | 0.08659  | -3.44846 |
| C  | 0.07771  | 3.63416  | -0.26853 |
| C  | -0.05622 | 4.49279  | 0.99930  |

|   |          |          |          |
|---|----------|----------|----------|
| C | 0.36762  | 4.47819  | -1.51999 |
| C | -1.21362 | 2.84305  | -0.48333 |
| C | -1.61294 | -1.06055 | 3.02689  |
| C | -2.03863 | 0.31092  | 2.49386  |
| C | -2.59926 | -2.15335 | 2.59368  |
| C | -1.49039 | -0.95786 | 4.55734  |
| H | -0.70949 | -1.03723 | -5.83362 |
| H | 0.90655  | -0.62801 | -5.19481 |
| H | -1.25996 | -3.39098 | -3.74913 |
| H | -2.46773 | -2.16515 | -4.20664 |
| H | -1.99484 | -2.35183 | -2.48149 |
| H | -0.30155 | 0.85020  | -3.48277 |
| H | -1.60915 | 0.13893  | -2.48352 |
| H | -1.83255 | 0.31489  | -4.23240 |
| H | 0.83224  | 5.11508  | 1.18283  |
| H | -0.23156 | 3.85523  | 1.88118  |
| H | -0.91622 | 5.17077  | 0.88331  |
| H | 1.26473  | 5.10494  | -1.40858 |
| H | -0.48462 | 5.15140  | -1.70233 |
| H | -1.46751 | 2.22936  | 0.39518  |
| H | -2.04253 | 3.55369  | -0.62341 |
| H | -1.16255 | 2.22788  | -1.39513 |
| H | -2.98954 | 0.58809  | 2.97202  |
| H | -1.28809 | 1.08393  | 2.72416  |
| H | -3.61368 | -1.88296 | 2.92581  |
| H | -2.59782 | -2.22856 | 1.49600  |
| H | -0.71390 | -0.22893 | 4.84238  |
| H | -1.27279 | -1.91976 | 5.04117  |
| H | -2.45464 | -0.60773 | 4.95725  |
| H | 0.41714  | -2.33623 | -5.42300 |
| H | -2.33896 | -3.13042 | 3.03242  |
| H | 0.49409  | 3.82952  | -2.40225 |
| C | 4.95388  | -1.09055 | -0.57815 |
| C | 6.32605  | -1.27252 | -0.40428 |
| C | 6.84933  | -1.35361 | 0.90734  |
| C | 5.95538  | -1.20838 | 1.99308  |
| C | 4.59740  | -1.02122 | 1.73371  |
| H | 4.53457  | -0.97640 | -1.57849 |
| H | 3.89890  | -0.84170 | 2.55158  |
| H | -2.21838 | 0.27698  | 1.41401  |
| N | 4.10795  | -1.00673 | 0.47377  |
| C | 3.05895  | 4.36611  | 0.21837  |
| N | 3.51904  | 5.43268  | 0.28369  |
| C | 4.68195  | 1.82086  | 0.51685  |
| N | 5.83007  | 1.77172  | 0.70184  |
| C | 3.44144  | -3.39807 | -1.44363 |
| N | 4.31024  | -4.11182 | -1.14145 |
| C | 1.44536  | -3.72952 | -3.74081 |
| N | 1.45468  | -4.64412 | -4.45974 |
| C | 2.86186  | -3.25049 | 2.33039  |
| N | 3.77356  | -3.97237 | 2.38816  |
| C | 0.25063  | -3.41352 | 3.91169  |
| N | 0.03252  | -4.25980 | 4.67954  |
| C | 8.24767  | -1.54550 | 1.12876  |
| N | 9.38494  | -1.70034 | 1.30870  |
| C | 6.41159  | -1.23117 | 3.34965  |
| N | 6.77441  | -1.25095 | 4.45255  |
| C | 7.17248  | -1.35753 | -1.55576 |
| N | 7.85321  | -1.42643 | -2.49399 |

|   |          |          |          |
|---|----------|----------|----------|
| H | -2.68104 | -0.73592 | -0.68363 |
| C | -3.84159 | -0.17958 | -1.04177 |
| H | -4.18586 | -0.82210 | -1.86461 |
| H | -3.60374 | 0.84391  | -1.36448 |
| C | -4.65243 | -0.23714 | 0.13077  |
| N | -5.25455 | -0.29998 | 1.12899  |

**L<sub>4</sub>Co<sup>III</sup>O + MeCN (S=1)**

89

mecn\_percn\_u2.out Energy: -2410840.1719752

|    |          |          |          |
|----|----------|----------|----------|
| C  | 0.86386  | -0.87210 | -1.61258 |
| N  | 0.57575  | -1.59835 | -2.72210 |
| C  | 1.47876  | -2.65249 | -2.82907 |
| C  | 2.38728  | -2.51654 | -1.79452 |
| N  | 2.03680  | -1.36255 | -1.10177 |
| B  | 2.56121  | -0.72756 | 0.22001  |
| N  | 2.40023  | 0.81818  | 0.14447  |
| C  | 1.14388  | 1.31068  | -0.06498 |
| N  | 1.22618  | 2.66479  | -0.07327 |
| C  | 2.55086  | 3.04272  | 0.13316  |
| C  | 3.28982  | 1.88241  | 0.26994  |
| N  | 1.64550  | -1.27726 | 1.35641  |
| C  | 0.37494  | -0.76878 | 1.43060  |
| N  | -0.24975 | -1.39678 | 2.45731  |
| C  | 0.56718  | -2.41487 | 2.93882  |
| C  | 1.75477  | -2.35312 | 2.23101  |
| Co | -0.26003 | 0.02944  | -0.26031 |
| O  | -1.56105 | -1.18671 | -0.43402 |
| C  | -0.52901 | -1.30689 | -3.72341 |
| C  | 0.08582  | -1.31249 | -5.13414 |
| C  | -1.61539 | -2.37788 | -3.55390 |
| C  | -1.09974 | 0.08983  | -3.45765 |
| C  | 0.07654  | 3.62982  | -0.26408 |
| C  | -0.04700 | 4.48989  | 1.00372  |
| C  | 0.35345  | 4.47225  | -1.51929 |
| C  | -1.21387 | 2.83384  | -0.46503 |
| C  | -1.61832 | -1.04568 | 3.01798  |
| C  | -2.04155 | 0.32401  | 2.47947  |
| C  | -2.59822 | -2.14260 | 2.58119  |
| C  | -1.50469 | -0.93905 | 4.54864  |
| H  | -0.69338 | -1.01694 | -5.85368 |
| H  | 0.91325  | -0.58738 | -5.20417 |
| H  | -1.23588 | -3.38544 | -3.78830 |
| H  | -2.44833 | -2.16338 | -4.24237 |
| H  | -1.98355 | -2.35925 | -2.51675 |
| H  | -0.31310 | 0.86095  | -3.47341 |
| H  | -1.62688 | 0.12443  | -2.49818 |
| H  | -1.82872 | 0.32095  | -4.24903 |
| H  | 0.84244  | 5.11339  | 1.17820  |
| H  | -0.21373 | 3.85369  | 1.88822  |
| H  | -0.90864 | 5.16682  | 0.89417  |
| H  | 1.24927  | 5.10227  | -1.41616 |
| H  | -0.50270 | 5.14210  | -1.69554 |
| H  | -1.45231 | 2.21538  | 0.41447  |
| H  | -2.04877 | 3.54021  | -0.58969 |
| H  | -1.17446 | 2.22418  | -1.38138 |

|   |          |          |          |
|---|----------|----------|----------|
| H | -2.99942 | 0.59830  | 2.94482  |
| H | -1.29560 | 1.09876  | 2.71839  |
| H | -3.61607 | -1.87336 | 2.90245  |
| H | -2.58593 | -2.22323 | 1.48402  |
| H | -0.73133 | -0.20798 | 4.83664  |
| H | -1.28805 | -1.89956 | 5.03561  |
| H | -2.47206 | -0.59008 | 4.94197  |
| H | 0.45065  | -2.30132 | -5.44405 |
| H | -2.33803 | -3.11702 | 3.02576  |
| H | 0.47479  | 3.82251  | -2.40145 |
| C | 4.95700  | -1.10776 | -0.57408 |
| C | 6.32779  | -1.29204 | -0.39149 |
| C | 6.84438  | -1.36246 | 0.92330  |
| C | 5.94527  | -1.20587 | 2.00325  |
| C | 4.58917  | -1.01785 | 1.73547  |
| H | 4.54382  | -1.00023 | -1.57761 |
| H | 3.88690  | -0.83091 | 2.54848  |
| H | -2.20928 | 0.29269  | 1.39745  |
| N | 4.10595  | -1.01240 | 0.47276  |
| C | 3.06265  | 4.36430  | 0.19560  |
| N | 3.52232  | 5.43136  | 0.25457  |
| C | 4.68804  | 1.81629  | 0.48956  |
| N | 5.83689  | 1.76399  | 0.66875  |
| C | 3.43535  | -3.40650 | -1.44983 |
| N | 4.29783  | -4.12547 | -1.14206 |
| C | 1.45256  | -3.72100 | -3.76278 |
| N | 1.46237  | -4.63173 | -4.48655 |
| C | 2.85161  | -3.24608 | 2.32381  |
| N | 3.76111  | -3.97063 | 2.38210  |
| C | 0.24579  | -3.39332 | 3.91538  |
| N | 0.02898  | -4.23541 | 4.68814  |
| C | 8.24116  | -1.55535 | 1.15329  |
| N | 9.37718  | -1.71105 | 1.34029  |
| C | 6.39445  | -1.21843 | 3.36231  |
| N | 6.75156  | -1.22999 | 4.46718  |
| C | 7.17998  | -1.38967 | -1.53763 |
| N | 7.86556  | -1.46898 | -2.47149 |
| H | -2.63039 | -0.77455 | -0.64204 |
| C | -3.86377 | -0.20705 | -0.94691 |
| H | -4.20358 | -0.85657 | -1.76604 |
| H | -3.62979 | 0.81675  | -1.27171 |
| C | -4.65811 | -0.27275 | 0.23096  |
| N | -5.25347 | -0.33947 | 1.23451  |

**L<sub>4</sub>Co<sup>III</sup>O + MeCN (S=2)**

89

mecn\_percn\_u4.out Energy: -2410824.4970146

|   |         |          |          |
|---|---------|----------|----------|
| C | 0.85644 | -0.85070 | -1.58949 |
| N | 0.57467 | -1.54471 | -2.71485 |
| C | 1.49352 | -2.58532 | -2.83565 |
| C | 2.38142 | -2.46866 | -1.77974 |
| N | 2.00472 | -1.34460 | -1.06055 |
| B | 2.57653 | -0.73966 | 0.27435  |
| N | 2.36545 | 0.82559  | 0.20074  |
| C | 1.13923 | 1.34505  | -0.03847 |
| N | 1.23715 | 2.69498  | -0.08071 |

|    |          |          |          |
|----|----------|----------|----------|
| C  | 2.56542  | 3.04179  | 0.14685  |
| C  | 3.27214  | 1.86344  | 0.32548  |
| N  | 1.61425  | -1.28146 | 1.38967  |
| C  | 0.35930  | -0.76870 | 1.49942  |
| N  | -0.26912 | -1.40793 | 2.51112  |
| C  | 0.55498  | -2.43123 | 2.97247  |
| C  | 1.73272  | -2.36351 | 2.24839  |
| Co | -0.33163 | 0.07669  | -0.22545 |
| O  | -1.54187 | -1.16540 | -0.38508 |
| C  | -0.52950 | -1.25403 | -3.72193 |
| C  | 0.09930  | -1.21132 | -5.12572 |
| C  | -1.58741 | -2.35796 | -3.58918 |
| C  | -1.13540 | 0.12301  | -3.43699 |
| C  | 0.13766  | 3.70498  | -0.36020 |
| C  | 0.02414  | 4.64353  | 0.85182  |
| C  | 0.50085  | 4.45063  | -1.65481 |
| C  | -1.19007 | 2.97640  | -0.55318 |
| C  | -1.63687 | -1.08433 | 3.09779  |
| C  | -2.13049 | 0.25258  | 2.54007  |
| C  | -2.58899 | -2.22585 | 2.71532  |
| C  | -1.48040 | -0.93457 | 4.62091  |
| H  | -0.68124 | -0.91968 | -5.84521 |
| H  | 0.90770  | -0.46363 | -5.17006 |
| H  | -1.18118 | -3.34803 | -3.84884 |
| H  | -2.42159 | -2.14554 | -4.27625 |
| H  | -1.97195 | -2.39382 | -2.55804 |
| H  | -0.36780 | 0.91313  | -3.43741 |
| H  | -1.68122 | 0.14252  | -2.48622 |
| H  | -1.86404 | 0.35121  | -4.22893 |
| H  | 0.92935  | 5.24741  | 1.00818  |
| H  | -0.18480 | 4.06892  | 1.76878  |
| H  | -0.81058 | 5.34082  | 0.68021  |
| H  | 1.43539  | 5.02318  | -1.56520 |
| H  | -0.30289 | 5.16591  | -1.88865 |
| H  | -1.52868 | 2.48786  | 0.37262  |
| H  | -1.96190 | 3.71983  | -0.80485 |
| H  | -1.15557 | 2.27983  | -1.40498 |
| H  | -3.05106 | 0.53078  | 3.07356  |
| H  | -1.38910 | 1.05473  | 2.68389  |
| H  | -3.60864 | -1.97696 | 3.04675  |
| H  | -2.60309 | -2.35592 | 1.62221  |
| H  | -0.74976 | -0.14601 | 4.86376  |
| H  | -1.18035 | -1.86571 | 5.12005  |
| H  | -2.45598 | -0.64406 | 5.04038  |
| H  | 0.49207  | -2.18282 | -5.45393 |
| H  | -2.29711 | -3.17802 | 3.18524  |
| H  | 0.59571  | 3.74414  | -2.49543 |
| C  | 4.93555  | -1.05159 | -0.57374 |
| C  | 6.28113  | -1.25817 | -0.41168 |
| C  | 6.85177  | -1.43108 | 0.90500  |
| C  | 5.92877  | -1.26317 | 2.00590  |
| C  | 4.59317  | -1.05414 | 1.77838  |
| H  | 4.52141  | -0.86073 | -1.56414 |
| H  | 3.91590  | -0.85807 | 2.60952  |
| H  | -2.39559 | 0.17631  | 1.48027  |
| N  | 4.04857  | -1.03518 | 0.49936  |
| C  | 3.11370  | 4.34976  | 0.18703  |
| N  | 3.61118  | 5.40022  | 0.22708  |
| C  | 4.66465  | 1.79111  | 0.58998  |



|   |          |          |          |
|---|----------|----------|----------|
| N | 5.80660  | 1.81249  | 0.80738  |
| C | 3.41910  | -3.37655 | -1.44148 |
| N | 4.24072  | -4.15416 | -1.17225 |
| C | 1.49194  | -3.62509 | -3.80141 |
| N | 1.52163  | -4.51435 | -4.55042 |
| C | 2.81122  | -3.28470 | 2.30783  |
| N | 3.66422  | -4.07355 | 2.35753  |
| C | 0.24366  | -3.41472 | 3.94713  |
| N | 0.03475  | -4.25987 | 4.71832  |
| C | 8.22160  | -1.68085 | 1.10370  |
| N | 9.36139  | -1.88880 | 1.26875  |
| C | 6.39310  | -1.28379 | 3.35960  |
| N | 6.77174  | -1.30492 | 4.45909  |
| C | 7.11154  | -1.27379 | -1.57786 |
| N | 7.78636  | -1.28977 | -2.52491 |
| H | -2.66872 | -0.82177 | -0.63180 |
| C | -3.91620 | -0.41355 | -0.94631 |
| H | -4.15227 | -1.09990 | -1.77216 |
| H | -3.77310 | 0.63328  | -1.24968 |
| C | -4.70328 | -0.58802 | 0.22499  |
| N | -5.30108 | -0.73469 | 1.21710  |

**LaCo<sup>III</sup>O + Ph2CH2 (S=0, closed-shell)**

108

ph2ch2\_ts\_u0\_closed.out Energy: -2642859.3672730

|    |          |          |          |
|----|----------|----------|----------|
| C  | 0.66956  | -0.84288 | -1.70317 |
| N  | 0.42427  | -1.48651 | -2.88075 |
| C  | 1.40824  | -2.44997 | -3.08331 |
| C  | 2.32294  | -2.32660 | -2.05370 |
| N  | 1.89358  | -1.27181 | -1.25935 |
| B  | 2.35638  | -0.68083 | 0.09583  |
| N  | 2.11316  | 0.85861  | 0.07114  |
| C  | 0.84805  | 1.29572  | -0.20325 |
| N  | 0.86590  | 2.65501  | -0.15903 |
| C  | 2.15753  | 3.08357  | 0.13800  |
| C  | 2.94193  | 1.95449  | 0.28260  |
| N  | 1.40209  | -1.32296 | 1.15130  |
| C  | 0.10942  | -0.87626 | 1.16433  |
| N  | -0.52014 | -1.49548 | 2.20204  |
| C  | 0.32068  | -2.48464 | 2.70796  |
| C  | 1.52674  | -2.38298 | 2.03824  |
| Co | -0.50565 | -0.02142 | -0.45825 |
| O  | -2.07644 | -0.71990 | -0.39769 |
| C  | -0.71989 | -1.22012 | -3.84231 |
| C  | -0.15980 | -1.15803 | -5.27437 |
| C  | -1.73486 | -2.35366 | -3.66352 |
| C  | -1.34072 | 0.14491  | -3.52697 |
| C  | -0.30334 | 3.59140  | -0.38564 |
| C  | -0.50114 | 4.43027  | 0.88814  |
| C  | 0.00921  | 4.45700  | -1.61690 |
| C  | -1.57233 | 2.78116  | -0.64444 |
| C  | -1.85277 | -1.10906 | 2.84849  |
| C  | -2.24696 | 0.31277  | 2.42946  |
| C  | -2.89981 | -2.13442 | 2.40560  |
| C  | -1.65725 | -1.10229 | 4.37666  |
| H  | -0.97469 | -0.85110 | -5.94796 |

|   |          |          |          |
|---|----------|----------|----------|
| H | 0.64796  | -0.41163 | -5.34911 |
| H | -1.29976 | -3.33147 | -3.92584 |
| H | -2.60451 | -2.18300 | -4.31524 |
| H | -2.08816 | -2.38611 | -2.62241 |
| H | -0.58567 | 0.94626  | -3.56212 |
| H | -1.84359 | 0.15331  | -2.55272 |
| H | -2.10592 | 0.35853  | -4.28883 |
| H | 0.35640  | 5.08289  | 1.10731  |
| H | -0.68148 | 3.77545  | 1.75626  |
| H | -1.38162 | 5.07792  | 0.75414  |
| H | 0.89202  | 5.09734  | -1.47171 |
| H | -0.84886 | 5.11762  | -1.81720 |
| H | -1.84981 | 2.15306  | 0.21387  |
| H | -2.39906 | 3.48953  | -0.80642 |
| H | -1.49314 | 2.16494  | -1.55170 |
| H | -3.11779 | 0.61373  | 3.03103  |
| H | -1.42831 | 1.02633  | 2.62229  |
| H | -3.87840 | -1.86526 | 2.83152  |
| H | -2.97488 | -2.11117 | 1.30945  |
| H | -0.82156 | -0.44367 | 4.66570  |
| H | -1.49465 | -2.09920 | 4.80635  |
| H | -2.57717 | -0.70634 | 4.83313  |
| H | 0.20970  | -2.12451 | -5.64103 |
| H | -2.64076 | -3.15163 | 2.74267  |
| H | 0.17294  | 3.82156  | -2.50271 |
| C | 4.79080  | -0.91313 | -0.60771 |
| C | 6.15492  | -1.06142 | -0.37443 |
| C | 6.62356  | -1.16937 | 0.95974  |
| C | 5.67126  | -1.07412 | 2.00517  |
| C | 4.32296  | -0.93185 | 1.68920  |
| H | 4.42013  | -0.75693 | -1.62112 |
| H | 3.58168  | -0.80240 | 2.47817  |
| H | -2.54005 | 0.35824  | 1.37694  |
| N | 3.88769  | -0.90429 | 0.40416  |
| C | 2.61184  | 4.42170  | 0.26453  |
| N | 3.03242  | 5.50082  | 0.37481  |
| C | 4.32620  | 1.94607  | 0.58580  |
| N | 5.46279  | 1.94694  | 0.83651  |
| C | 3.44307  | -3.15952 | -1.80733 |
| N | 4.36476  | -3.83478 | -1.58398 |
| C | 1.45180  | -3.44819 | -4.09111 |
| N | 1.53158  | -4.30989 | -4.86862 |
| C | 2.64764  | -3.24261 | 2.15732  |
| N | 3.57367  | -3.94375 | 2.23534  |
| C | -0.00205 | -3.50273 | 3.64317  |
| N | -0.20962 | -4.38678 | 4.37044  |
| C | 8.01156  | -1.33257 | 1.24143  |
| N | 9.14365  | -1.46619 | 1.47081  |
| C | 6.06550  | -1.10860 | 3.38081  |
| N | 6.37951  | -1.13761 | 4.49855  |
| C | 7.05383  | -1.08493 | -1.48820 |
| N | 7.77803  | -1.10661 | -2.39594 |
| H | -3.06662 | -0.79023 | -1.05275 |
| C | -4.35687 | -0.74941 | -1.56611 |
| H | -4.24797 | -0.06453 | -2.42019 |
| C | -4.93211 | -0.07633 | -0.38937 |
| C | -4.71017 | -2.12338 | -1.98045 |
| C | -5.63670 | -0.73567 | 0.64376  |
| C | -4.69423 | 1.31236  | -0.23566 |

|   |          |          |          |
|---|----------|----------|----------|
| C | -5.19107 | -2.36067 | -3.28770 |
| C | -4.51764 | -3.24237 | -1.13857 |
| C | -6.05931 | -0.04216 | 1.78042  |
| H | -5.86396 | -1.80028 | 0.55261  |
| C | -5.11207 | 2.00248  | 0.90008  |
| H | -4.16598 | 1.84395  | -1.03263 |
| C | -5.48685 | -3.65337 | -3.72810 |
| H | -5.33515 | -1.51091 | -3.96392 |
| C | -4.81229 | -4.53525 | -1.57831 |
| H | -4.10085 | -3.09725 | -0.13899 |
| C | -5.79305 | 1.32648  | 1.92361  |
| H | -6.60499 | -0.57710 | 2.56494  |
| H | -4.90491 | 3.07396  | 0.99171  |
| C | -5.30067 | -4.74891 | -2.87470 |
| H | -5.86310 | -3.80767 | -4.74490 |
| H | -4.64757 | -5.38535 | -0.90799 |
| H | -6.12057 | 1.86318  | 2.81955  |
| H | -5.52706 | -5.76289 | -3.21957 |

**L<sub>4</sub>Co<sup>III</sup>O + Ph<sub>2</sub>CH<sub>2</sub> (S=0, open-shell)**

108

ph2ch2\_ts\_u0\_open.out Energy: -2642865.0830873

|    |          |          |          |
|----|----------|----------|----------|
| C  | 0.63710  | -0.87184 | -1.64450 |
| N  | 0.36738  | -1.59167 | -2.76710 |
| C  | 1.33171  | -2.58227 | -2.92498 |
| C  | 2.26166  | -2.40958 | -1.91622 |
| N  | 1.85860  | -1.29870 | -1.18483 |
| B  | 2.38897  | -0.66616 | 0.13322  |
| N  | 2.16750  | 0.87187  | 0.09563  |
| C  | 0.89033  | 1.32265  | -0.10293 |
| N  | 0.93211  | 2.68141  | -0.08417 |
| C  | 2.24232  | 3.09943  | 0.13370  |
| C  | 3.02002  | 1.96237  | 0.24721  |
| N  | 1.53059  | -1.28565 | 1.27591  |
| C  | 0.24330  | -0.82620 | 1.38771  |
| N  | -0.33419 | -1.51119 | 2.40891  |
| C  | 0.52661  | -2.51713 | 2.83568  |
| C  | 1.69590  | -2.38950 | 2.10590  |
| Co | -0.46628 | -0.00968 | -0.28006 |
| O  | -1.81449 | -1.19066 | -0.35432 |
| C  | -0.79157 | -1.37276 | -3.72309 |
| C  | -0.24331 | -1.34323 | -5.16053 |
| C  | -1.79090 | -2.51347 | -3.49773 |
| C  | -1.43222 | -0.01252 | -3.43438 |
| C  | -0.24359 | 3.61469  | -0.25809 |
| C  | -0.40353 | 4.43539  | 1.03204  |
| C  | 0.01640  | 4.50057  | -1.48745 |
| C  | -1.51096 | 2.79242  | -0.49255 |
| C  | -1.68524 | -1.20801 | 3.03526  |
| C  | -2.16385 | 0.16663  | 2.56032  |
| C  | -2.66302 | -2.30825 | 2.60289  |
| C  | -1.50935 | -1.15229 | 4.56317  |
| H  | -1.07217 | -1.08966 | -5.83965 |
| H  | 0.53848  | -0.57330 | -5.26839 |
| H  | -1.35728 | -3.49106 | -3.76379 |
| H  | -2.68623 | -2.35598 | -4.11878 |

|   |          |          |          |
|---|----------|----------|----------|
| H | -2.09669 | -2.52061 | -2.44199 |
| H | -0.69729 | 0.80478  | -3.51079 |
| H | -1.89540 | 0.00338  | -2.44363 |
| H | -2.22702 | 0.15935  | -4.17601 |
| H | 0.46596  | 5.07879  | 1.23330  |
| H | -0.55962 | 3.76864  | 1.89585  |
| H | -1.28385 | 5.08989  | 0.93439  |
| H | 0.89144  | 5.15491  | -1.36072 |
| H | -0.85846 | 5.14872  | -1.65288 |
| H | -1.75080 | 2.15180  | 0.37071  |
| H | -2.35419 | 3.48822  | -0.61912 |
| H | -1.44509 | 2.19384  | -1.41437 |
| H | -3.10428 | 0.40582  | 3.07865  |
| H | -1.42619 | 0.95293  | 2.78784  |
| H | -3.65696 | -2.09692 | 3.02591  |
| H | -2.73582 | -2.31095 | 1.50475  |
| H | -0.73143 | -0.42280 | 4.84303  |
| H | -1.26430 | -2.12563 | 5.00992  |
| H | -2.46247 | -0.82493 | 5.00683  |
| H | 0.15882  | -2.30963 | -5.49331 |
| H | -2.34141 | -3.30088 | 2.95818  |
| H | 0.16389  | 3.87934  | -2.38610 |
| C | 4.76378  | -0.87572 | -0.75781 |
| C | 6.14667  | -1.01838 | -0.64353 |
| C | 6.71885  | -1.16152 | 0.64215  |
| C | 5.86064  | -1.11344 | 1.76473  |
| C | 4.48787  | -0.96242 | 1.56413  |
| H | 4.30165  | -0.71705 | -1.73328 |
| H | 3.81422  | -0.85909 | 2.41513  |
| H | -2.38089 | 0.15681  | 1.48752  |
| N | 3.95383  | -0.89169 | 0.32534  |
| C | 2.71169  | 4.43462  | 0.23068  |
| N | 3.13753  | 5.51378  | 0.31905  |
| C | 4.41808  | 1.94473  | 0.47563  |
| N | 5.56700  | 1.93516  | 0.66277  |
| C | 3.37585  | -3.23780 | -1.63130 |
| N | 4.29365  | -3.90826 | -1.37843 |
| C | 1.34794  | -3.63551 | -3.87602 |
| N | 1.40173  | -4.53547 | -4.61143 |
| C | 2.81913  | -3.25364 | 2.13676  |
| N | 3.74835  | -3.95556 | 2.14087  |
| C | 0.25776  | -3.54305 | 3.77882  |
| N | 0.08107  | -4.42089 | 4.52166  |
| C | 8.12958  | -1.32035 | 0.80439  |
| N | 9.27665  | -1.44874 | 0.93663  |
| C | 6.36682  | -1.20492 | 3.10070  |
| N | 6.77020  | -1.28161 | 4.18691  |
| C | 6.95219  | -1.00879 | -1.82725 |
| N | 7.59943  | -1.00255 | -2.79134 |
| H | -3.00782 | -0.67020 | -0.71323 |
| C | -4.14229 | -0.29302 | -1.05974 |
| H | -3.95343 | 0.58161  | -1.70092 |
| C | -4.80943 | 0.13263  | 0.20562  |
| C | -4.67187 | -1.43879 | -1.86119 |
| C | -5.45000 | -0.76286 | 1.08637  |
| C | -4.75009 | 1.49283  | 0.57971  |
| C | -5.20870 | -1.21102 | -3.14286 |
| C | -4.58839 | -2.76825 | -1.40051 |
| C | -5.98624 | -0.31843 | 2.29826  |

|   |          |          |          |
|---|----------|----------|----------|
| H | -5.53237 | -1.81977 | 0.82482  |
| C | -5.28568 | 1.93957  | 1.78935  |
| H | -4.27873 | 2.21011  | -0.09850 |
| C | -5.66564 | -2.27223 | -3.93183 |
| H | -5.26505 | -0.18607 | -3.52563 |
| C | -5.04493 | -3.82990 | -2.18651 |
| H | -4.11800 | -2.97323 | -0.43503 |
| C | -5.90163 | 1.03223  | 2.66168  |
| H | -6.47553 | -1.03504 | 2.96615  |
| H | -5.22446 | 3.00075  | 2.05209  |
| C | -5.58723 | -3.58681 | -3.45545 |
| H | -6.08084 | -2.07178 | -4.92507 |
| H | -4.96313 | -4.85589 | -1.81294 |
| H | -6.32026 | 1.37597  | 3.61286  |
| H | -5.93896 | -4.41928 | -4.07335 |

**LiCo<sup>III</sup>O + Ph2CH2 (S=1)**

108

ph2ch2\_ts\_u2.out Energy: -2642867.3710684

|    |          |          |          |
|----|----------|----------|----------|
| C  | 0.64026  | -0.87181 | -1.66628 |
| N  | 0.37063  | -1.59521 | -2.78560 |
| C  | 1.33206  | -2.58967 | -2.93737 |
| C  | 2.25895  | -2.41753 | -1.92554 |
| N  | 1.85749  | -1.30213 | -1.19968 |
| B  | 2.38212  | -0.66793 | 0.12070  |
| N  | 2.16398  | 0.86988  | 0.08077  |
| C  | 0.88684  | 1.32082  | -0.10997 |
| N  | 0.92965  | 2.67933  | -0.10356 |
| C  | 2.24220  | 3.09742  | 0.09983  |
| C  | 3.01961  | 1.96032  | 0.21545  |
| N  | 1.51761  | -1.28133 | 1.26077  |
| C  | 0.22822  | -0.82375 | 1.37322  |
| N  | -0.34648 | -1.51092 | 2.39517  |
| C  | 0.51527  | -2.51733 | 2.81817  |
| C  | 1.68369  | -2.38688 | 2.08827  |
| Co | -0.47510 | -0.01068 | -0.28413 |
| O  | -1.79854 | -1.19752 | -0.41439 |
| C  | -0.78264 | -1.37441 | -3.74889 |
| C  | -0.21957 | -1.33096 | -5.18043 |
| C  | -1.77864 | -2.52190 | -3.54349 |
| C  | -1.43632 | -0.02116 | -3.45561 |
| C  | -0.24704 | 3.61088  | -0.27828 |
| C  | -0.40197 | 4.43992  | 1.00697  |
| C  | 0.00558  | 4.48853  | -1.51489 |
| C  | -1.51302 | 2.78337  | -0.50123 |
| C  | -1.69964 | -1.21747 | 3.01810  |
| C  | -2.17750 | 0.15953  | 2.55227  |
| C  | -2.67110 | -2.31705 | 2.57024  |
| C  | -1.53365 | -1.17309 | 4.54741  |
| H  | -1.04329 | -1.08173 | -5.86736 |
| H  | 0.55564  | -0.55266 | -5.27499 |
| H  | -1.33708 | -3.49630 | -3.80782 |
| H  | -2.66410 | -2.36519 | -4.17837 |
| H  | -2.10279 | -2.53523 | -2.49319 |
| H  | -0.70619 | 0.80194  | -3.51604 |
| H  | -1.90981 | -0.02030 | -2.46947 |

|   |          |          |          |
|---|----------|----------|----------|
| H | -2.22240 | 0.15143  | -4.20625 |
| H | 0.46881  | 5.08405  | 1.20031  |
| H | -0.55483 | 3.77894  | 1.87582  |
| H | -1.28231 | 5.09425  | 0.90837  |
| H | 0.87894  | 5.14658  | -1.39614 |
| H | -0.87207 | 5.13261  | -1.68143 |
| H | -1.74264 | 2.14636  | 0.36753  |
| H | -2.36078 | 3.47424  | -0.62451 |
| H | -1.45164 | 2.18252  | -1.42219 |
| H | -3.12387 | 0.39185  | 3.06243  |
| H | -1.44394 | 0.94577  | 2.79258  |
| H | -3.66899 | -2.11222 | 2.98667  |
| H | -2.73232 | -2.31308 | 1.47138  |
| H | -0.75795 | -0.44540 | 4.83791  |
| H | -1.29130 | -2.14962 | 4.98840  |
| H | -2.48991 | -0.84949 | 4.98707  |
| H | 0.19642  | -2.29133 | -5.51414 |
| H | -2.34866 | -3.31109 | 2.92080  |
| H | 0.15153  | 3.86136  | -2.40964 |
| C | 4.76463  | -0.89677 | -0.75049 |
| C | 6.14585  | -1.04484 | -0.62113 |
| C | 6.70550  | -1.17236 | 0.67164  |
| C | 5.83741  | -1.10251 | 1.78561  |
| C | 4.46738  | -0.94930 | 1.57006  |
| H | 4.31251  | -0.74756 | -1.73212 |
| H | 3.78540  | -0.83288 | 2.41291  |
| H | -2.38334 | 0.16162  | 1.47775  |
| N | 3.94498  | -0.89515 | 0.32525  |
| C | 2.71248  | 4.43313  | 0.18391  |
| N | 3.13853  | 5.51298  | 0.26191  |
| C | 4.41951  | 1.94151  | 0.43222  |
| N | 5.56997  | 1.93035  | 0.60949  |
| C | 3.36862  | -3.24967 | -1.63450 |
| N | 4.28255  | -3.92352 | -1.37658 |
| C | 1.34961  | -3.64363 | -3.88769 |
| N | 1.40379  | -4.54305 | -4.62373 |
| C | 2.80858  | -3.24879 | 2.11877  |
| N | 3.73894  | -3.94918 | 2.12360  |
| C | 0.24870  | -3.54623 | 3.75868  |
| N | 0.07551  | -4.42721 | 4.49862  |
| C | 8.11359  | -1.33778 | 0.84943  |
| N | 9.25844  | -1.47189 | 0.99455  |
| C | 6.33067  | -1.17532 | 3.12754  |
| N | 6.72345  | -1.23658 | 4.21860  |
| C | 6.96256  | -1.05566 | -1.79708 |
| N | 7.61896  | -1.06588 | -2.75493 |
| H | -2.96377 | -0.67941 | -0.64988 |
| C | -4.13876 | -0.27000 | -0.97924 |
| H | -3.92403 | 0.61337  | -1.60006 |
| C | -4.81440 | 0.13500  | 0.28142  |
| C | -4.64258 | -1.40237 | -1.80965 |
| C | -5.47598 | -0.76890 | 1.13973  |
| C | -4.75613 | 1.49066  | 0.67683  |
| C | -5.12557 | -1.15584 | -3.11022 |
| C | -4.58814 | -2.73891 | -1.36328 |
| C | -6.02771 | -0.33876 | 2.34946  |
| H | -5.56253 | -1.82106 | 0.86150  |
| C | -5.30837 | 1.92258  | 1.88385  |
| H | -4.27048 | 2.21560  | 0.01717  |

|   |          |          |          |
|---|----------|----------|----------|
| C | -5.56280 | -2.20284 | -3.92804 |
| H | -5.15751 | -0.12616 | -3.48281 |
| C | -5.02323 | -3.78660 | -2.17952 |
| H | -4.15882 | -2.96159 | -0.38295 |
| C | -5.94149 | 1.00607  | 2.73432  |
| H | -6.53172 | -1.06215 | 2.99887  |
| H | -5.24644 | 2.97970  | 2.16233  |
| C | -5.51527 | -3.52372 | -3.46483 |
| H | -5.93787 | -1.98660 | -4.93385 |
| H | -4.96450 | -4.81761 | -1.81558 |
| H | -6.37283 | 1.33823  | 3.68389  |
| H | -5.85102 | -4.34550 | -4.10546 |

**LiCo<sup>III</sup>O + Ph2CH2 (S=2)**

108

ph2ch2\_ts\_u4.out Energy: -2642860.4640466

|    |          |          |          |
|----|----------|----------|----------|
| C  | 0.67079  | -0.87210 | -1.63720 |
| N  | 0.40126  | -1.58018 | -2.75819 |
| C  | 1.35560  | -2.58560 | -2.89375 |
| C  | 2.25470  | -2.43511 | -1.85237 |
| N  | 1.84844  | -1.32455 | -1.12888 |
| B  | 2.42429  | -0.69922 | 0.19394  |
| N  | 2.18965  | 0.86212  | 0.12314  |
| C  | 0.95140  | 1.36396  | -0.10210 |
| N  | 1.03591  | 2.71449  | -0.15519 |
| C  | 2.36304  | 3.08068  | 0.05064  |
| C  | 3.08602  | 1.91280  | 0.22888  |
| N  | 1.49295  | -1.26595 | 1.32225  |
| C  | 0.22704  | -0.78160 | 1.45256  |
| N  | -0.36856 | -1.44647 | 2.46969  |
| C  | 0.48181  | -2.45923 | 2.90436  |
| C  | 1.64697  | -2.35718 | 2.16435  |
| Co | -0.50119 | 0.05935  | -0.25396 |
| O  | -1.73453 | -1.12947 | -0.36606 |
| C  | -0.73029 | -1.34383 | -3.74700 |
| C  | -0.12677 | -1.26163 | -5.16002 |
| C  | -1.72239 | -2.50397 | -3.59944 |
| C  | -1.40307 | -0.00330 | -3.44280 |
| C  | -0.08115 | 3.70494  | -0.42515 |
| C  | -0.18611 | 4.65560  | 0.77865  |
| C  | 0.24763  | 4.44230  | -1.73359 |
| C  | -1.40468 | 2.95907  | -0.58413 |
| C  | -1.72333 | -1.14297 | 3.08887  |
| C  | -2.22713 | 0.20495  | 2.57257  |
| C  | -2.68448 | -2.27092 | 2.69026  |
| C  | -1.54430 | -1.03567 | 4.61312  |
| H  | -0.93349 | -1.00765 | -5.86500 |
| H  | 0.64029  | -0.47189 | -5.21325 |
| H  | -1.26672 | -3.46920 | -3.86984 |
| H  | -2.58399 | -2.33836 | -4.26354 |
| H  | -2.09241 | -2.55880 | -2.56501 |
| H  | -0.68083 | 0.82837  | -3.46793 |
| H  | -1.91120 | -0.01943 | -2.47350 |
| H  | -2.17054 | 0.18052  | -4.20936 |
| H  | 0.71394  | 5.27239  | 0.91302  |
| H  | -0.37086 | 4.08758  | 1.70497  |

|   |          |          |          |
|---|----------|----------|----------|
| H | -1.03268 | 5.34065  | 0.61584  |
| H | 1.17634  | 5.02759  | -1.66667 |
| H | -0.56946 | 5.14453  | -1.96099 |
| H | -1.71019 | 2.46678  | 0.35064  |
| H | -2.18973 | 3.69525  | -0.81623 |
| H | -1.38757 | 2.25584  | -1.43103 |
| H | -3.13925 | 0.47172  | 3.12586  |
| H | -1.48454 | 1.00540  | 2.71853  |
| H | -3.68948 | -2.04511 | 3.07823  |
| H | -2.73834 | -2.34184 | 1.59300  |
| H | -0.79808 | -0.26479 | 4.86550  |
| H | -1.25319 | -1.98345 | 5.08557  |
| H | -2.50928 | -0.73893 | 5.05244  |
| H | 0.31161  | -2.20933 | -5.50048 |
| H | -2.36978 | -3.24409 | 3.09886  |
| H | 0.33702  | 3.72770  | -2.56802 |
| C | 4.77926  | -0.95571 | -0.68729 |
| C | 6.13054  | -1.13981 | -0.54730 |
| C | 6.72341  | -1.31607 | 0.75939  |
| C | 5.81326  | -1.17243 | 1.87503  |
| C | 4.47095  | -0.98572 | 1.66797  |
| H | 4.34641  | -0.76381 | -1.66943 |
| H | 3.80185  | -0.80968 | 2.51019  |
| H | -2.51159 | 0.14850  | 1.51736  |
| N | 3.90794  | -0.96689 | 0.39794  |
| C | 2.89595  | 4.39532  | 0.07198  |
| N | 3.37896  | 5.45319  | 0.09481  |
| C | 4.48155  | 1.86407  | 0.48256  |
| N | 5.62423  | 1.90637  | 0.69374  |
| C | 3.32658  | -3.30982 | -1.53394 |
| N | 4.17558  | -4.06455 | -1.28478 |
| C | 1.38259  | -3.62394 | -3.86065 |
| N | 1.44037  | -4.50971 | -4.61233 |
| C | 2.74378  | -3.25786 | 2.19675  |
| N | 3.61259  | -4.03053 | 2.22561  |
| C | 0.20075  | -3.46569 | 3.86448  |
| N | 0.01308  | -4.32907 | 4.62101  |
| C | 8.09930  | -1.54653 | 0.93595  |
| N | 9.24456  | -1.73876 | 1.08259  |
| C | 6.29704  | -1.19594 | 3.22169  |
| N | 6.69180  | -1.21983 | 4.31553  |
| C | 6.94354  | -1.12981 | -1.72555 |
| N | 7.60460  | -1.12554 | -2.68249 |
| H | -3.01920 | -0.62931 | -0.66884 |
| C | -4.16648 | -0.32627 | -1.01288 |
| H | -3.99150 | 0.52124  | -1.69377 |
| C | -4.82936 | 0.13764  | 0.23210  |
| C | -4.61321 | -1.54018 | -1.75457 |
| C | -5.52411 | -0.71931 | 1.11372  |
| C | -4.71366 | 1.50442  | 0.58130  |
| C | -5.10293 | -1.40820 | -3.06980 |
| C | -4.49367 | -2.83500 | -1.20735 |
| C | -6.06541 | -0.22899 | 2.30322  |
| H | -5.65197 | -1.77440 | 0.86327  |
| C | -5.25862 | 1.99429  | 1.76715  |
| H | -4.18754 | 2.18445  | -0.09582 |
| C | -5.49624 | -2.53136 | -3.80211 |
| H | -5.17886 | -0.41177 | -3.51760 |
| C | -4.87691 | -3.95835 | -1.94319 |



|   |          |          |          |
|---|----------|----------|----------|
| H | -4.05980 | -2.96496 | -0.21232 |
| C | -5.93144 | 1.12616  | 2.63957  |
| H | -6.60145 | -0.90831 | 2.97337  |
| H | -5.15943 | 3.05549  | 2.01551  |
| C | -5.38352 | -3.81060 | -3.24167 |
| H | -5.88424 | -2.40918 | -4.81833 |
| H | -4.76822 | -4.95621 | -1.50696 |
| H | -6.35644 | 1.50506  | 3.57419  |
| H | -5.67943 | -4.69186 | -3.81941 |

**LaCo<sup>III</sup>O + 9-Ph-fluorene (S=0, closed-shell)**

116

phflu\_ts\_u0\_closed.out Energy: -2787063.1930150

|    |          |          |          |
|----|----------|----------|----------|
| C  | 0.66905  | -1.17793 | -1.57828 |
| N  | 0.36812  | -2.04537 | -2.58926 |
| C  | 1.38630  | -2.98730 | -2.69495 |
| C  | 2.35493  | -2.65294 | -1.76604 |
| N  | 1.92407  | -1.49517 | -1.13599 |
| B  | 2.40962  | -0.71752 | 0.11132  |
| N  | 2.21109  | 0.80476  | -0.13223 |
| C  | 0.98221  | 1.22103  | -0.55010 |
| N  | 1.02387  | 2.57402  | -0.67408 |
| C  | 2.27278  | 3.02689  | -0.26020 |
| C  | 3.02468  | 1.91454  | 0.07092  |
| N  | 1.43680  | -1.17205 | 1.23988  |
| C  | 0.17342  | -0.64861 | 1.21246  |
| N  | -0.45648 | -1.06923 | 2.34692  |
| C  | 0.32903  | -2.04398 | 2.95690  |
| C  | 1.51589  | -2.11944 | 2.25080  |
| Co | -0.45426 | -0.03309 | -0.52725 |
| O  | -2.11644 | -0.35976 | -0.26200 |
| C  | -0.94167 | -2.06899 | -3.36609 |
| C  | -0.73362 | -2.69272 | -4.75375 |
| C  | -1.91799 | -2.90233 | -2.52849 |
| C  | -1.42029 | -0.62764 | -3.56708 |
| C  | -0.10170 | 3.46794  | -1.16287 |
| C  | -0.68129 | 4.19926  | 0.05541  |
| C  | 0.45773  | 4.43982  | -2.21549 |
| C  | -1.16921 | 2.60609  | -1.83140 |
| C  | -1.69504 | -0.44494 | 3.00186  |
| C  | -1.87669 | 0.97951  | 2.46220  |
| C  | -2.89571 | -1.34018 | 2.69653  |
| C  | -1.43532 | -0.33248 | 4.51601  |
| H  | -1.64613 | -2.50370 | -5.33965 |
| H  | 0.11259  | -2.23075 | -5.28813 |
| H  | -1.51697 | -3.91465 | -2.35556 |
| H  | -2.86996 | -2.99422 | -3.06879 |
| H  | -2.10229 | -2.41136 | -1.56090 |
| H  | -0.64827 | -0.02332 | -4.06947 |
| H  | -1.71327 | -0.14864 | -2.62637 |
| H  | -2.32232 | -0.64125 | -4.19543 |
| H  | 0.06667  | 4.84673  | 0.54092  |
| H  | -1.06363 | 3.47491  | 0.79248  |
| H  | -1.52462 | 4.82790  | -0.26961 |
| H  | 1.17564  | 5.16257  | -1.80547 |
| H  | -0.38223 | 5.01888  | -2.62927 |
| H  | -1.72530 | 1.98217  | -1.11714 |
| H  | -1.91181 | 3.26943  | -2.29305 |

|   |          |          |          |
|---|----------|----------|----------|
| H | -0.73839 | 1.98048  | -2.62624 |
| H | -2.69035 | 1.45497  | 3.03109  |
| H | -0.96128 | 1.57691  | 2.61030  |
| H | -3.80733 | -0.90224 | 3.13295  |
| H | -3.03102 | -1.41616 | 1.61090  |
| H | -0.48723 | 0.19058  | 4.72437  |
| H | -1.43735 | -1.29963 | 5.03488  |
| H | -2.25350 | 0.26117  | 4.95160  |
| H | -0.59718 | -3.78111 | -4.72170 |
| H | -2.76259 | -2.34765 | 3.12450  |
| H | 0.93520  | 3.88779  | -3.04157 |
| C | 4.82318  | -0.98613 | -0.59422 |
| C | 6.19366  | -1.11811 | -0.38164 |
| C | 6.68492  | -1.17434 | 0.94575  |
| C | 5.75494  | -1.04719 | 2.00490  |
| C | 4.39948  | -0.91253 | 1.70843  |
| H | 4.42652  | -0.89497 | -1.60636 |
| H | 3.67850  | -0.73883 | 2.50673  |
| H | -2.14657 | 0.98256  | 1.40295  |
| N | 3.94235  | -0.93294 | 0.43466  |
| C | 2.70519  | 4.37204  | -0.12749 |
| N | 3.10828  | 5.45162  | 0.03130  |
| C | 4.36515  | 1.92821  | 0.52917  |
| N | 5.46734  | 1.94083  | 0.90315  |
| C | 3.52577  | -3.38989 | -1.45792 |
| N | 4.48691  | -3.98744 | -1.18509 |
| C | 1.46645  | -4.13520 | -3.52702 |
| N | 1.62708  | -5.10884 | -4.14257 |
| C | 2.57250  | -3.04767 | 2.42727  |
| N | 3.44908  | -3.80530 | 2.54116  |
| C | -0.03865 | -2.91314 | 4.01751  |
| N | -0.28640 | -3.68730 | 4.84961  |
| C | 8.08004  | -1.32421 | 1.20688  |
| N | 9.21607  | -1.44726 | 1.41927  |
| C | 6.17517  | -1.03242 | 3.37312  |
| N | 6.50936  | -1.02100 | 4.48521  |
| C | 7.07320  | -1.18708 | -1.50902 |
| N | 7.78173  | -1.24616 | -2.42721 |
| H | -3.21864 | -0.25614 | -0.75546 |
| C | -4.55637 | -0.04378 | -1.06643 |
| C | -4.72398 | -0.27516 | -2.52716 |
| C | -4.53505 | 1.43348  | -0.92932 |
| C | -5.21386 | -0.93821 | -0.06971 |
| C | -4.95287 | -1.44973 | -3.25504 |
| C | -4.65404 | 0.97114  | -3.21555 |
| C | -4.41377 | 2.24101  | 0.21093  |
| C | -4.55276 | 2.03613  | -2.21953 |
| C | -4.88727 | -2.31045 | -0.02110 |
| C | -6.16431 | -0.45675 | 0.85325  |
| C | -5.02804 | -1.38960 | -4.65418 |
| H | -5.08234 | -2.40691 | -2.74388 |
| C | -4.71949 | 1.02465  | -4.61228 |
| C | -4.34380 | 3.63222  | 0.06198  |
| H | -4.38023 | 1.79293  | 1.20635  |
| C | -4.49503 | 3.42754  | -2.36078 |
| C | -5.48312 | -3.16517 | 0.90837  |
| H | -4.12552 | -2.70281 | -0.69844 |
| C | -6.75593 | -1.31024 | 1.79120  |
| H | -6.45558 | 0.59645  | 0.82749  |

|   |          |          |          |
|---|----------|----------|----------|
| C | -4.89314 | -0.16567 | -5.33181 |
| H | -5.19759 | -2.30890 | -5.22420 |
| H | -4.65240 | 1.98422  | -5.13560 |
| C | -4.39286 | 4.22410  | -1.21259 |
| H | -4.25447 | 4.26633  | 0.94998  |
| H | -4.52221 | 3.88757  | -3.35417 |
| C | -6.41856 | -2.66835 | 1.82587  |
| H | -5.20354 | -4.22372 | 0.92788  |
| H | -7.49199 | -0.90971 | 2.49638  |
| H | -4.94565 | -0.14016 | -6.42489 |
| H | -4.34460 | 5.31363  | -1.30777 |
| H | -6.87967 | -3.33483 | 2.56181  |

### LaCo<sup>III</sup>O + 9-Ph-fluorene (S=1)

116

phflu\_ts\_u2.out Energy: -2787068.3068658

|    |          |          |          |
|----|----------|----------|----------|
| C  | 0.76717  | -1.20364 | -1.61544 |
| N  | 0.54714  | -2.13481 | -2.58280 |
| C  | 1.50867  | -3.13662 | -2.49361 |
| C  | 2.38906  | -2.76746 | -1.49493 |
| N  | 1.96173  | -1.53522 | -1.01840 |
| B  | 2.43923  | -0.68630 | 0.19361  |
| N  | 2.27675  | 0.82141  | -0.13044 |
| C  | 1.03414  | 1.22633  | -0.50677 |
| N  | 1.08181  | 2.56113  | -0.73391 |
| C  | 2.36217  | 3.02714  | -0.45685 |
| C  | 3.12065  | 1.93064  | -0.08428 |
| N  | 1.48346  | -1.06837 | 1.35822  |
| C  | 0.21219  | -0.55185 | 1.33189  |
| N  | -0.41818 | -1.02174 | 2.44126  |
| C  | 0.38218  | -1.97194 | 3.06612  |
| C  | 1.57517  | -2.01824 | 2.36868  |
| Co | -0.40634 | -0.02848 | -0.51879 |
| O  | -1.85583 | -1.03324 | -0.50814 |
| C  | -0.56304 | -2.12894 | -3.61898 |
| C  | 0.04767  | -2.43010 | -4.99959 |
| C  | -1.58149 | -3.19113 | -3.18966 |
| C  | -1.19800 | -0.73899 | -3.68204 |
| C  | -0.10166 | 3.38327  | -1.17569 |
| C  | -0.56355 | 4.23719  | 0.01325  |
| C  | 0.29634  | 4.24229  | -2.38592 |
| C  | -1.20623 | 2.41961  | -1.60559 |
| C  | -1.74625 | -0.53858 | 2.99189  |
| C  | -2.16676 | 0.72422  | 2.24097  |
| C  | -2.77362 | -1.65517 | 2.78598  |
| C  | -1.55091 | -0.17605 | 4.47479  |
| H  | -0.74112 | -2.29835 | -5.75629 |
| H  | 0.86477  | -1.72665 | -5.22971 |
| H  | -1.11948 | -4.18852 | -3.11139 |
| H  | -2.38590 | -3.24576 | -3.93624 |
| H  | -2.01254 | -2.90650 | -2.21758 |
| H  | -0.44578 | 0.02922  | -3.92329 |
| H  | -1.70308 | -0.48934 | -2.74465 |
| H  | -1.96222 | -0.74170 | -4.47325 |
| H  | 0.21394  | 4.95116  | 0.32900  |
| H  | -0.82764 | 3.59659  | 0.87034  |

|   |          |          |          |
|---|----------|----------|----------|
| H | -1.45894 | 4.80888  | -0.27734 |
| H | 1.03554  | 5.01602  | -2.13490 |
| H | -0.60256 | 4.75697  | -2.75968 |
| H | -1.59970 | 1.82127  | -0.76149 |
| H | -2.06707 | 3.00001  | -1.95999 |
| H | -0.88429 | 1.77202  | -2.43379 |
| H | -3.07741 | 1.11435  | 2.71930  |
| H | -1.39069 | 1.50502  | 2.28649  |
| H | -3.77149 | -1.30741 | 3.09639  |
| H | -2.81774 | -1.91159 | 1.71923  |
| H | -0.75428 | 0.57684  | 4.59382  |
| H | -1.32028 | -1.04363 | 5.10832  |
| H | -2.49171 | 0.25545  | 4.85054  |
| H | 0.42032  | -3.45799 | -5.10107 |
| H | -2.52923 | -2.55535 | 3.37240  |
| H | 0.69699  | 3.61246  | -3.19683 |
| C | 4.86608  | -1.06811 | -0.46481 |
| C | 6.23633  | -1.17291 | -0.22521 |
| C | 6.71174  | -1.07775 | 1.10367  |
| C | 5.77184  | -0.85295 | 2.13572  |
| C | 4.41800  | -0.75429 | 1.81128  |
| H | 4.47822  | -1.08698 | -1.48450 |
| H | 3.68433  | -0.50999 | 2.57985  |
| H | -2.39374 | 0.49745  | 1.19372  |
| N | 3.97828  | -0.89910 | 0.54161  |
| C | 2.80544  | 4.37374  | -0.50242 |
| N | 3.20042  | 5.46792  | -0.50943 |
| C | 4.49089  | 1.95225  | 0.27311  |
| N | 5.61734  | 1.96658  | 0.56654  |
| C | 3.47528  | -3.53203 | -0.99926 |
| N | 4.36493  | -4.15627 | -0.58169 |
| C | 1.56501  | -4.36173 | -3.20822 |
| N | 1.65551  | -5.39587 | -3.73347 |
| C | 2.65766  | -2.90851 | 2.57884  |
| N | 3.55626  | -3.63366 | 2.72857  |
| C | 0.03872  | -2.80431 | 4.16313  |
| N | -0.20032 | -3.52789 | 5.04219  |
| C | 8.10817  | -1.17420 | 1.39119  |
| N | 9.24378  | -1.25027 | 1.62426  |
| C | 6.17733  | -0.70271 | 3.50065  |
| N | 6.49895  | -0.58200 | 4.60989  |
| C | 7.12929  | -1.35932 | -1.32867 |
| N | 7.84836  | -1.51281 | -2.22745 |
| H | -3.02246 | -0.56210 | -0.87663 |
| C | -4.27367 | -0.25528 | -1.13602 |
| C | -4.45828 | -0.59207 | -2.58885 |
| C | -4.36088 | 1.23846  | -1.10891 |
| C | -4.96865 | -1.10445 | -0.11376 |
| C | -4.61428 | -1.82485 | -3.22824 |
| C | -4.48287 | 0.60276  | -3.35674 |
| C | -4.34851 | 2.13887  | -0.03624 |
| C | -4.43719 | 1.73975  | -2.43750 |
| C | -4.62324 | -2.46720 | 0.01073  |
| C | -5.97885 | -0.59863 | 0.72719  |
| C | -4.73574 | -1.86329 | -4.62500 |
| H | -4.64110 | -2.75452 | -2.65638 |
| C | -4.58976 | 0.56205  | -4.75049 |
| C | -4.40683 | 3.51711  | -0.28886 |
| H | -4.30894 | 1.77970  | 0.99231  |

|   |          |          |          |
|---|----------|----------|----------|
| C | -4.49942 | 3.11495  | -2.68767 |
| C | -5.26805 | -3.29381 | 0.93318  |
| H | -3.80933 | -2.86820 | -0.59724 |
| C | -6.61727 | -1.42416 | 1.65981  |
| H | -6.28459 | 0.44683  | 0.63993  |
| C | -4.70563 | -0.68271 | -5.38434 |
| H | -4.85419 | -2.82832 | -5.12834 |
| H | -4.60016 | 1.48709  | -5.33595 |
| C | -4.48161 | 4.00442  | -1.60383 |
| H | -4.40050 | 4.21943  | 0.55063  |
| H | -4.56492 | 3.49146  | -3.71346 |
| C | -6.26661 | -2.77522 | 1.76743  |
| H | -4.97676 | -4.34615 | 1.01378  |
| H | -7.40160 | -1.00802 | 2.30081  |
| H | -4.79269 | -0.73406 | -6.47427 |
| H | -4.52892 | 5.08316  | -1.78299 |
| H | -6.76737 | -3.41962 | 2.49710  |

**LiCo<sup>III</sup>O + 9-Ph-fluorene (S=2)**

116

phflu\_ts\_u4.out Energy: -2787059.8522174

|    |          |          |          |
|----|----------|----------|----------|
| C  | 0.79479  | -1.12971 | -1.60225 |
| N  | 0.58606  | -1.98502 | -2.63150 |
| C  | 1.52308  | -3.01354 | -2.55995 |
| C  | 2.35678  | -2.73026 | -1.49420 |
| N  | 1.93465  | -1.52197 | -0.96463 |
| B  | 2.46091  | -0.72862 | 0.28386  |
| N  | 2.27008  | 0.80300  | -0.03433 |
| C  | 1.05727  | 1.24328  | -0.42441 |
| N  | 1.14759  | 2.55116  | -0.74474 |
| C  | 2.46100  | 2.96372  | -0.54967 |
| C  | 3.16722  | 1.85912  | -0.09516 |
| N  | 1.45463  | -1.12194 | 1.41992  |
| C  | 0.18724  | -0.62234 | 1.42081  |
| N  | -0.43973 | -1.11268 | 2.51895  |
| C  | 0.39482  | -2.03300 | 3.14647  |
| C  | 1.57971  | -2.05743 | 2.43420  |
| Co | -0.44825 | 0.01664  | -0.46527 |
| O  | -1.75517 | -1.08683 | -0.62494 |
| C  | -0.44295 | -1.87280 | -3.74540 |
| C  | 0.29550  | -1.98487 | -5.09176 |
| C  | -1.46045 | -3.00114 | -3.54317 |
| C  | -1.11926 | -0.50186 | -3.69665 |
| C  | 0.02707  | 3.38043  | -1.32023 |
| C  | -0.16641 | 4.64283  | -0.46673 |
| C  | 0.38498  | 3.70974  | -2.77762 |
| C  | -1.25210 | 2.54854  | -1.26590 |
| C  | -1.77583 | -0.67976 | 3.09747  |
| C  | -2.35682 | 0.44971  | 2.25293  |
| C  | -2.72403 | -1.88521 | 3.07858  |
| C  | -1.51975 | -0.14982 | 4.51940  |
| H  | -0.43513 | -1.81879 | -5.89840 |
| H  | 1.08010  | -1.21501 | -5.17211 |
| H  | -0.98995 | -3.99481 | -3.59816 |
| H  | -2.22413 | -2.94411 | -4.33127 |
| H  | -1.95499 | -2.88892 | -2.56657 |

|   |          |          |          |
|---|----------|----------|----------|
| H | -0.38192 | 0.31391  | -3.76437 |
| H | -1.73105 | -0.38271 | -2.79791 |
| H | -1.80119 | -0.42182 | -4.55615 |
| H | 0.68769  | 5.33165  | -0.53490 |
| H | -0.33096 | 4.37775  | 0.59006  |
| H | -1.05616 | 5.17964  | -0.83137 |
| H | 1.30456  | 4.31051  | -2.84980 |
| H | -0.43404 | 4.29366  | -3.22553 |
| H | -1.60698 | 2.40098  | -0.23382 |
| H | -2.05613 | 3.08344  | -1.78926 |
| H | -1.15578 | 1.59357  | -1.82151 |
| H | -3.26660 | 0.81042  | 2.75423  |
| H | -1.65932 | 1.29706  | 2.15513  |
| H | -3.73026 | -1.56150 | 3.38737  |
| H | -2.79939 | -2.29103 | 2.06009  |
| H | -0.80813 | 0.69165  | 4.49918  |
| H | -1.13985 | -0.92061 | 5.20496  |
| H | -2.47417 | 0.21189  | 4.93284  |
| H | 0.74527  | -2.97219 | -5.26234 |
| H | -2.40470 | -2.68542 | 3.76240  |
| H | 0.51934  | 2.78633  | -3.36428 |
| C | 4.86901  | -1.16423 | -0.37542 |
| C | 6.20423  | -1.32043 | -0.10552 |
| C | 6.70007  | -1.24962 | 1.25124  |
| C | 5.71653  | -0.89279 | 2.24964  |
| C | 4.39479  | -0.75082 | 1.91457  |
| H | 4.51199  | -1.15342 | -1.40532 |
| H | 3.66919  | -0.42261 | 2.65887  |
| H | -2.64010 | 0.08990  | 1.25755  |
| N | 3.92287  | -0.97581 | 0.62590  |
| C | 2.97975  | 4.26184  | -0.78871 |
| N | 3.43640  | 5.31332  | -0.98508 |
| C | 4.54572  | 1.85520  | 0.24148  |
| N | 5.67625  | 1.92084  | 0.50545  |
| C | 3.37976  | -3.57138 | -0.98239 |
| N | 4.18812  | -4.29948 | -0.57148 |
| C | 1.59000  | -4.18093 | -3.36407 |
| N | 1.68144  | -5.16852 | -3.97179 |
| C | 2.66617  | -2.94773 | 2.64160  |
| N | 3.52195  | -3.71478 | 2.81966  |
| C | 0.09566  | -2.83581 | 4.27779  |
| N | -0.10311 | -3.52363 | 5.19445  |
| C | 8.05521  | -1.45011 | 1.56881  |
| N | 9.18283  | -1.61798 | 1.83401  |
| C | 6.10433  | -0.65330 | 3.60653  |
| N | 6.42081  | -0.46224 | 4.70932  |
| C | 7.10038  | -1.52929 | -1.20189 |
| N | 7.83004  | -1.70299 | -2.09084 |
| H | -3.07492 | -0.54679 | -0.87506 |
| C | -4.27297 | -0.28318 | -1.06595 |
| C | -4.45305 | -0.61016 | -2.52821 |
| C | -4.38542 | 1.21336  | -1.02298 |
| C | -4.94669 | -1.15467 | -0.04722 |
| C | -4.58569 | -1.84238 | -3.17040 |
| C | -4.49440 | 0.59234  | -3.27959 |
| C | -4.40836 | 2.09600  | 0.06303  |
| C | -4.46371 | 1.72313  | -2.34665 |
| C | -4.54150 | -2.49935 | 0.09198  |
| C | -6.00563 | -0.68486 | 0.75452  |

|   |          |          |          |
|---|----------|----------|----------|
| C | -4.72083 | -1.86985 | -4.56726 |
| H | -4.58911 | -2.77638 | -2.60416 |
| C | -4.61407 | 0.56255  | -4.66997 |
| C | -4.50717 | 3.47535  | -0.17400 |
| H | -4.36828 | 1.72579  | 1.08756  |
| C | -4.55674 | 3.09662  | -2.58160 |
| C | -5.18472 | -3.35107 | 0.99123  |
| H | -3.68995 | -2.86533 | -0.48734 |
| C | -6.64217 | -1.53735 | 1.66212  |
| H | -6.35220 | 0.34601  | 0.64950  |
| C | -4.71794 | -0.68192 | -5.31224 |
| H | -4.82774 | -2.83116 | -5.07909 |
| H | -4.64683 | 1.49055  | -5.24901 |
| C | -4.57650 | 3.97266  | -1.48357 |
| H | -4.53244 | 4.16757  | 0.67282  |
| H | -4.62546 | 3.48538  | -3.60215 |
| C | -6.23647 | -2.87223 | 1.78379  |
| H | -4.85196 | -4.38914 | 1.08824  |
| H | -7.46806 | -1.15703 | 2.27166  |
| H | -4.81560 | -0.72392 | -6.40144 |
| H | -4.65144 | 5.05136  | -1.65204 |
| H | -6.73678 | -3.53698 | 2.49491  |

**LaCo<sup>III</sup>O + 9-tBu-fluorene (S=0, closed-shell)**

118

tbuflu\_ts\_u0\_closed.out Energy: -2740758.0259440

|    |          |          |          |
|----|----------|----------|----------|
| C  | 0.65432  | -1.20895 | -1.51476 |
| N  | 0.34314  | -2.09068 | -2.51051 |
| C  | 1.36461  | -3.02636 | -2.62742 |
| C  | 2.35137  | -2.67082 | -1.72617 |
| N  | 1.92427  | -1.50912 | -1.10175 |
| B  | 2.43326  | -0.71874 | 0.12558  |
| N  | 2.20551  | 0.79704  | -0.11611 |
| C  | 0.95974  | 1.19691  | -0.49919 |
| N  | 0.98993  | 2.54998  | -0.64182 |
| C  | 2.24634  | 3.01673  | -0.27098 |
| C  | 3.01684  | 1.91423  | 0.04845  |
| N  | 1.50123  | -1.18413 | 1.27997  |
| C  | 0.22715  | -0.68191 | 1.30320  |
| N  | -0.34476 | -1.13186 | 2.45789  |
| C  | 0.48368  | -2.09588 | 3.02833  |
| C  | 1.64049  | -2.13991 | 2.27461  |
| Co | -0.46768 | -0.06976 | -0.43820 |
| O  | -2.15273 | -0.37311 | -0.16084 |
| C  | -0.96498 | -2.10706 | -3.28475 |
| C  | -0.76355 | -2.73682 | -4.67085 |
| C  | -1.94955 | -2.93029 | -2.44667 |
| C  | -1.41605 | -0.65706 | -3.48832 |
| C  | -0.15404 | 3.43020  | -1.10728 |
| C  | -0.73091 | 4.13452  | 0.12764  |
| C  | 0.37047  | 4.42898  | -2.15276 |
| C  | -1.20623 | 2.55335  | -1.77699 |
| C  | -1.56803 | -0.56825 | 3.17912  |
| C  | -1.93308 | 0.79610  | 2.58467  |
| C  | -2.69592 | -1.59199 | 3.03335  |
| C  | -1.18591 | -0.33880 | 4.65500  |

|   |          |          |          |
|---|----------|----------|----------|
| H | -1.67576 | -2.54238 | -5.25556 |
| H | 0.08553  | -2.28360 | -5.20829 |
| H | -1.54078 | -3.93473 | -2.24718 |
| H | -2.88846 | -3.04687 | -3.00303 |
| H | -2.16256 | -2.42504 | -1.49310 |
| H | -0.61634 | -0.06197 | -3.95726 |
| H | -1.73021 | -0.18407 | -2.55128 |
| H | -2.29427 | -0.64700 | -4.14768 |
| H | 0.01852  | 4.77481  | 0.62083  |
| H | -1.10559 | 3.39429  | 0.85299  |
| H | -1.57809 | 4.76593  | -0.18028 |
| H | 1.05724  | 5.17826  | -1.73768 |
| H | -0.49193 | 4.97575  | -2.56438 |
| H | -1.72457 | 1.89562  | -1.06614 |
| H | -1.97914 | 3.20207  | -2.20757 |
| H | -0.76968 | 1.95973  | -2.59276 |
| H | -2.75088 | 1.22019  | 3.18733  |
| H | -1.07504 | 1.48771  | 2.63469  |
| H | -3.60031 | -1.22411 | 3.54121  |
| H | -2.92024 | -1.73869 | 1.96856  |
| H | -0.28886 | 0.29672  | 4.73626  |
| H | -1.02207 | -1.26632 | 5.21910  |
| H | -2.02147 | 0.18647  | 5.14245  |
| H | -0.63562 | -3.82620 | -4.63499 |
| H | -2.42442 | -2.55941 | 3.48576  |
| H | 0.87013  | 3.90190  | -2.98199 |
| C | 4.83654  | -0.97277 | -0.63299 |
| C | 6.21230  | -1.08362 | -0.44691 |
| C | 6.73349  | -1.10824 | 0.87085  |
| C | 5.82297  | -0.97405 | 1.94685  |
| C | 4.46093  | -0.86069 | 1.67687  |
| H | 4.41838  | -0.90482 | -1.63813 |
| H | 3.75513  | -0.68335 | 2.48801  |
| H | -2.26093 | 0.71011  | 1.54459  |
| N | 3.97576  | -0.91109 | 0.41309  |
| C | 2.67375  | 4.36560  | -0.16090 |
| N | 3.07828  | 5.44693  | -0.01850 |
| C | 4.37111  | 1.94797  | 0.46288  |
| N | 5.48440  | 1.98388  | 0.80073  |
| C | 3.53408  | -3.39466 | -1.43350 |
| N | 4.50523  | -3.98253 | -1.17545 |
| C | 1.43025  | -4.18802 | -3.44144 |
| N | 1.57748  | -5.17227 | -4.04332 |
| C | 2.72119  | -3.04892 | 2.40196  |
| N | 3.61267  | -3.79369 | 2.47724  |
| C | 0.18258  | -2.96974 | 4.10567  |
| N | -0.01437 | -3.74040 | 4.95457  |
| C | 8.13513  | -1.23430 | 1.10484  |
| N | 9.27725  | -1.33745 | 1.29531  |
| C | 6.26968  | -0.93131 | 3.30620  |
| N | 6.62512  | -0.89767 | 4.41127  |
| C | 7.06864  | -1.16292 | -1.59135 |
| N | 7.75867  | -1.23063 | -2.52302 |
| H | -3.20228 | -0.24406 | -0.70656 |
| C | -4.55991 | 0.01598  | -1.14545 |
| C | -4.66440 | -0.22445 | -2.61410 |
| C | -4.50750 | 1.50510  | -1.03400 |
| C | -4.84342 | -1.40027 | -3.36192 |
| C | -4.60733 | 1.01422  | -3.31693 |



|   |          |          |          |
|---|----------|----------|----------|
| C | -4.34761 | 2.36028  | 0.07269  |
| C | -4.53721 | 2.08984  | -2.33535 |
| C | -4.88995 | -1.34509 | -4.76178 |
| H | -4.94895 | -2.36814 | -2.87200 |
| C | -4.64306 | 1.06940  | -4.71407 |
| C | -4.30312 | 3.74748  | -0.11658 |
| H | -4.24492 | 1.96690  | 1.08217  |
| C | -4.50289 | 3.47622  | -2.51991 |
| C | -4.77353 | -0.12115 | -5.44043 |
| H | -5.01789 | -2.27205 | -5.33011 |
| H | -4.58455 | 2.03209  | -5.23255 |
| C | -4.39842 | 4.31002  | -1.39994 |
| H | -4.18929 | 4.40127  | 0.75413  |
| H | -4.54802 | 3.90199  | -3.52775 |
| H | -4.80183 | -0.09674 | -6.53437 |
| H | -4.37052 | 5.39710  | -1.52510 |
| C | -5.41823 | -0.85971 | -0.18206 |
| C | -6.87526 | -0.90593 | -0.70512 |
| H | -6.95103 | -1.41669 | -1.67722 |
| H | -7.51806 | -1.44441 | 0.01373  |
| H | -7.27639 | 0.11533  | -0.82490 |
| C | -4.86191 | -2.29792 | -0.08909 |
| H | -3.81722 | -2.28902 | 0.25575  |
| H | -5.46082 | -2.89027 | 0.62375  |
| H | -4.88772 | -2.82607 | -1.05228 |
| C | -5.46587 | -0.27960 | 1.24334  |
| H | -5.95584 | -0.99907 | 1.92101  |
| H | -4.46013 | -0.08399 | 1.63427  |
| H | -6.04382 | 0.65644  | 1.28120  |

**L<sub>4</sub>Co<sup>III</sup>O + 9-tBu-fluorene (S=1)**

118

tbuflu\_ts\_u2.out Energy: -2740763.0447898

|    |          |          |          |
|----|----------|----------|----------|
| C  | 0.75309  | -1.25005 | -1.53890 |
| N  | 0.52809  | -2.19864 | -2.48957 |
| C  | 1.49143  | -3.19716 | -2.39664 |
| C  | 2.38540  | -2.80716 | -1.41865 |
| N  | 1.96148  | -1.56683 | -0.96077 |
| B  | 2.46272  | -0.69340 | 0.21868  |
| N  | 2.28090  | 0.80609  | -0.12424 |
| C  | 1.02671  | 1.19747  | -0.47784 |
| N  | 1.06508  | 2.53057  | -0.72658 |
| C  | 2.34784  | 3.00674  | -0.48392 |
| C  | 3.12032  | 1.91937  | -0.11427 |
| N  | 1.54054  | -1.06674 | 1.40915  |
| C  | 0.26185  | -0.56681 | 1.40676  |
| N  | -0.31916 | -1.01384 | 2.55443  |
| C  | 0.51719  | -1.93237 | 3.18056  |
| C  | 1.68367  | -1.98377 | 2.44223  |
| Co | -0.41632 | -0.04692 | -0.45733 |
| O  | -1.92429 | -1.01747 | -0.37840 |
| C  | -0.57645 | -2.19382 | -3.52671 |
| C  | 0.03109  | -2.52449 | -4.90227 |
| C  | -1.60825 | -3.23800 | -3.08567 |
| C  | -1.17741 | -0.79010 | -3.60744 |
| C  | -0.12829 | 3.33961  | -1.16130 |

|   |          |          |          |
|---|----------|----------|----------|
| C | -0.59042 | 4.19271  | 0.02790  |
| C | 0.24953  | 4.19944  | -2.37764 |
| C | -1.22350 | 2.36218  | -1.58107 |
| C | -1.60613 | -0.50497 | 3.16941  |
| C | -2.08791 | 0.70817  | 2.37329  |
| C | -2.62879 | -1.64723 | 3.13623  |
| C | -1.30019 | -0.04583 | 4.60760  |
| H | -0.75283 | -2.38281 | -5.66228 |
| H | 0.86506  | -1.84315 | -5.13841 |
| H | -1.14512 | -4.22991 | -2.95767 |
| H | -2.38617 | -3.32787 | -3.85580 |
| H | -2.06812 | -2.92269 | -2.13613 |
| H | -0.39982 | -0.04381 | -3.83654 |
| H | -1.69072 | -0.52436 | -2.67853 |
| H | -1.92550 | -0.77334 | -4.41233 |
| H | 0.18512  | 4.91082  | 0.33936  |
| H | -0.84818 | 3.55167  | 0.88662  |
| H | -1.49021 | 4.75869  | -0.25988 |
| H | 0.97540  | 4.98793  | -2.13436 |
| H | -0.66032 | 4.69583  | -2.74961 |
| H | -1.61134 | 1.76663  | -0.73176 |
| H | -2.08890 | 2.93180  | -1.93977 |
| H | -0.89539 | 1.71237  | -2.40485 |
| H | -2.98210 | 1.11294  | 2.87068  |
| H | -1.32208 | 1.49996  | 2.34763  |
| H | -3.58246 | -1.30188 | 3.56350  |
| H | -2.79885 | -1.96528 | 2.09760  |
| H | -0.49928 | 0.71160  | 4.61331  |
| H | -1.01623 | -0.87030 | 5.27658  |
| H | -2.21022 | 0.41168  | 5.02605  |
| H | 0.37954  | -3.56206 | -4.99075 |
| H | -2.29399 | -2.51323 | 3.72820  |
| H | 0.65743  | 3.57286  | -3.18750 |
| C | 4.87416  | -1.08834 | -0.49183 |
| C | 6.24971  | -1.19178 | -0.28368 |
| C | 6.75796  | -1.06478 | 1.03035  |
| C | 5.84575  | -0.79979 | 2.07754  |
| C | 4.48506  | -0.70200 | 1.78362  |
| H | 4.46095  | -1.13339 | -1.50065 |
| H | 3.77170  | -0.42772 | 2.56133  |
| H | -2.34521 | 0.42376  | 1.34684  |
| N | 4.01259  | -0.88780 | 0.53109  |
| C | 2.78372  | 4.35480  | -0.55301 |
| N | 3.17518  | 5.45002  | -0.57739 |
| C | 4.49995  | 1.95393  | 0.20378  |
| N | 5.63480  | 1.97991  | 0.46214  |
| C | 3.48179  | -3.55814 | -0.92502 |
| N | 4.38246  | -4.16840 | -0.51022 |
| C | 1.53707  | -4.43593 | -3.08800 |
| N | 1.61859  | -5.48018 | -3.59442 |
| C | 2.78498  | -2.85330 | 2.64233  |
| N | 3.69614  | -3.56327 | 2.78847  |
| C | 0.23286  | -2.72551 | 4.32250  |
| N | 0.04286  | -3.41307 | 5.24160  |
| C | 8.15976  | -1.16918 | 1.28757  |
| N | 9.29959  | -1.25259 | 1.49629  |
| C | 6.28545  | -0.61012 | 3.42685  |
| N | 6.63457  | -0.45736 | 4.52377  |
| C | 7.11332  | -1.41355 | -1.40379 |

|   |          |          |          |
|---|----------|----------|----------|
| N | 7.80809  | -1.59567 | -2.31625 |
| H | -3.06031 | -0.61003 | -0.83221 |
| C | -4.31431 | -0.27686 | -1.22409 |
| C | -4.39355 | -0.52973 | -2.70442 |
| C | -4.36607 | 1.22642  | -1.13358 |
| C | -4.48225 | -1.72133 | -3.43558 |
| C | -4.42326 | 0.70086  | -3.41263 |
| C | -4.30839 | 2.10126  | -0.03682 |
| C | -4.42786 | 1.78939  | -2.43938 |
| C | -4.54703 | -1.68226 | -4.83503 |
| H | -4.49369 | -2.68817 | -2.93454 |
| C | -4.47259 | 0.74421  | -4.80938 |
| C | -4.35717 | 3.48788  | -0.24109 |
| H | -4.21771 | 1.72900  | 0.98035  |
| C | -4.48827 | 3.17174  | -2.64372 |
| C | -4.52634 | -0.45959 | -5.52353 |
| H | -4.60850 | -2.62061 | -5.39556 |
| H | -4.48486 | 1.70395  | -5.33589 |
| C | -4.45897 | 4.02553  | -1.53293 |
| H | -4.31447 | 4.15710  | 0.62401  |
| H | -4.55093 | 3.58033  | -3.65737 |
| H | -4.56698 | -0.44676 | -6.61727 |
| H | -4.50229 | 5.11011  | -1.67344 |
| C | -5.23694 | -1.15894 | -0.30955 |
| C | -6.65334 | -1.21696 | -0.92933 |
| H | -6.66748 | -1.75712 | -1.88797 |
| H | -7.34250 | -1.73309 | -0.23794 |
| H | -7.04478 | -0.19987 | -1.10516 |
| C | -5.38622 | -0.57213 | 1.10485  |
| H | -5.91489 | -1.29369 | 1.75017  |
| H | -4.41206 | -0.37088 | 1.56342  |
| H | -5.97300 | 0.35895  | 1.10229  |
| C | -4.67191 | -2.58942 | -0.16646 |
| H | -4.62948 | -3.12587 | -1.12471 |
| H | -3.65167 | -2.56618 | 0.24317  |
| H | -5.31591 | -3.17972 | 0.50763  |

**LaCo<sup>III</sup>O + 9-tBu-fluorene (S=2)**

118

tbuflu\_ts\_u4.out Energy: -2740755.0001561

|   |          |          |          |
|---|----------|----------|----------|
| C | 0.76659  | -1.18993 | -1.52967 |
| N | 0.55239  | -2.07055 | -2.53751 |
| C | 1.48508  | -3.10109 | -2.44590 |
| C | 2.32976  | -2.79117 | -1.39760 |
| N | 1.91609  | -1.56749 | -0.89895 |
| B | 2.48044  | -0.73430 | 0.30100  |
| N | 2.27940  | 0.78322  | -0.06564 |
| C | 1.05696  | 1.20836  | -0.43999 |
| N | 1.13888  | 2.50350  | -0.81129 |
| C | 2.45779  | 2.92117  | -0.67227 |
| C | 3.17546  | 1.83491  | -0.19355 |
| N | 1.51206  | -1.09275 | 1.47788  |
| C | 0.24351  | -0.59648 | 1.50499  |
| N | -0.33508 | -1.04958 | 2.64679  |
| C | 0.52552  | -1.94394 | 3.27519  |
| C | 1.68165  | -1.98981 | 2.51913  |

|    |          |          |          |
|----|----------|----------|----------|
| Co | -0.46698 | -0.00024 | -0.40564 |
| O  | -1.82668 | -1.06797 | -0.57759 |
| C  | -0.46038 | -1.97077 | -3.66478 |
| C  | 0.28816  | -2.13699 | -5.00053 |
| C  | -1.49472 | -3.07904 | -3.43972 |
| C  | -1.09894 | -0.58151 | -3.66095 |
| C  | -0.00058 | 3.31156  | -1.37542 |
| C  | -0.15240 | 4.61471  | -0.57627 |
| C  | 0.29084  | 3.57040  | -2.86142 |
| C  | -1.27755 | 2.49030  | -1.21877 |
| C  | -1.62976 | -0.57232 | 3.27392  |
| C  | -2.21950 | 0.53341  | 2.40560  |
| C  | -2.59585 | -1.76175 | 3.36995  |
| C  | -1.29469 | 0.01327  | 4.65795  |
| H  | -0.42961 | -1.96498 | -5.81743 |
| H  | 1.09779  | -1.39458 | -5.09049 |
| H  | -1.02875 | -4.07649 | -3.43616 |
| H  | -2.23133 | -3.05805 | -4.25415 |
| H  | -2.01125 | -2.92022 | -2.48135 |
| H  | -0.33631 | 0.20830  | -3.75122 |
| H  | -1.70404 | -0.41737 | -2.76577 |
| H  | -1.77554 | -0.50698 | -4.52420 |
| H  | 0.69760  | 5.29682  | -0.71955 |
| H  | -0.26613 | 4.40217  | 0.49891  |
| H  | -1.05819 | 5.13576  | -0.92392 |
| H  | 1.20996  | 4.15989  | -3.00210 |
| H  | -0.54468 | 4.13952  | -3.29795 |
| H  | -1.58485 | 2.39927  | -0.16500 |
| H  | -2.10270 | 2.99792  | -1.73503 |
| H  | -1.21156 | 1.50690  | -1.73209 |
| H  | -3.11098 | 0.93146  | 2.91103  |
| H  | -1.51075 | 1.36445  | 2.26117  |
| H  | -3.55531 | -1.41494 | 3.78338  |
| H  | -2.78111 | -2.19399 | 2.37498  |
| H  | -0.55980 | 0.82956  | 4.56788  |
| H  | -0.90749 | -0.73814 | 5.36078  |
| H  | -2.21794 | 0.42429  | 5.09540  |
| H  | 0.70675  | -3.14184 | -5.14579 |
| H  | -2.21875 | -2.55348 | 4.03360  |
| H  | 0.39291  | 2.62087  | -3.41160 |
| C  | 4.86785  | -1.19949 | -0.41577 |
| C  | 6.21005  | -1.35254 | -0.18075 |
| C  | 6.74743  | -1.23191 | 1.15653  |
| C  | 5.79665  | -0.83025 | 2.16938  |
| C  | 4.46598  | -0.69388 | 1.86920  |
| H  | 4.47974  | -1.22616 | -1.43395 |
| H  | 3.76509  | -0.33209 | 2.62163  |
| H  | -2.51940 | 0.13875  | 1.42760  |
| N  | 3.95359  | -0.96825 | 0.60577  |
| C  | 2.97088  | 4.20602  | -0.98388 |
| N  | 3.42385  | 5.24564  | -1.24215 |
| C  | 4.56296  | 1.84244  | 0.10360  |
| N  | 5.70074  | 1.91755  | 0.33150  |
| C  | 3.35504  | -3.62064 | -0.87165 |
| N  | 4.16518  | -4.34025 | -0.44945 |
| C  | 1.53828  | -4.29369 | -3.21328 |
| N  | 1.61987  | -5.30191 | -3.78762 |
| C  | 2.77959  | -2.86777 | 2.71948  |
| N  | 3.64312  | -3.62569 | 2.89901  |

|   |          |          |          |
|---|----------|----------|----------|
| C | 0.27431  | -2.70376 | 4.44707  |
| N | 0.11410  | -3.35507 | 5.39736  |
| C | 8.11069  | -1.42803 | 1.44032  |
| N | 9.24507  | -1.59237 | 1.67732  |
| C | 6.22609  | -0.54137 | 3.50386  |
| N | 6.57604  | -0.31062 | 4.58880  |
| C | 7.07077  | -1.61111 | -1.29473 |
| N | 7.77121  | -1.82615 | -2.19804 |
| H | -3.11872 | -0.60011 | -0.80347 |
| C | -4.33599 | -0.31104 | -1.11670 |
| C | -4.37616 | -0.48353 | -2.61332 |
| C | -4.42988 | 1.18553  | -0.94079 |
| C | -4.41734 | -1.63688 | -3.40656 |
| C | -4.42436 | 0.78434  | -3.24902 |
| C | -4.43874 | 1.99382  | 0.20627  |
| C | -4.47192 | 1.81708  | -2.21469 |
| C | -4.47727 | -1.52028 | -4.80246 |
| H | -4.40124 | -2.63062 | -2.96090 |
| C | -4.46566 | 0.90503  | -4.63844 |
| C | -4.52158 | 3.38899  | 0.07880  |
| H | -4.38384 | 1.56670  | 1.20351  |
| C | -4.56663 | 3.20352  | -2.34336 |
| C | -4.48657 | -0.26146 | -5.41833 |
| H | -4.51117 | -2.42588 | -5.41575 |
| H | -4.50107 | 1.89065  | -5.11250 |
| C | -4.59374 | 3.99329  | -1.18274 |
| H | -4.53187 | 4.00821  | 0.98075  |
| H | -4.61809 | 3.66804  | -3.33281 |
| H | -4.52262 | -0.18786 | -6.50956 |
| H | -4.66400 | 5.08220  | -1.26514 |
| C | -5.21260 | -1.29374 | -0.25939 |
| C | -4.54991 | -2.68460 | -0.16547 |
| H | -3.57155 | -2.62109 | 0.33541  |
| H | -5.19601 | -3.36579 | 0.41273  |
| H | -4.38233 | -3.14742 | -1.14785 |
| C | -5.44455 | -0.79164 | 1.17561  |
| H | -5.97432 | -1.56951 | 1.74969  |
| H | -4.50284 | -0.58937 | 1.69844  |
| H | -6.06590 | 0.11622  | 1.19975  |
| C | -6.60542 | -1.41222 | -0.92779 |
| H | -6.56171 | -1.92139 | -1.90134 |
| H | -7.27805 | -1.98950 | -0.27058 |
| H | -7.05071 | -0.41445 | -1.08181 |

**L<sub>4</sub>Co<sup>III</sup>O + THF (S=0, open-shell)**

96

thf\_percn\_ts\_u0\_open.out Energy: -2473389.2914736

|   |         |          |          |
|---|---------|----------|----------|
| C | 0.59745 | -1.16139 | -1.51703 |
| N | 0.33255 | -2.05131 | -2.51362 |
| C | 1.35194 | -2.99614 | -2.57380 |
| C | 2.31178 | -2.61845 | -1.65143 |
| N | 1.86668 | -1.43721 | -1.06896 |
| B | 2.38921 | -0.59462 | 0.13018  |
| N | 2.04363 | 0.90306  | -0.09780 |
| C | 0.72260 | 1.20397  | -0.26916 |
| N | 0.62189 | 2.54865  | -0.42660 |

|    |          |          |          |
|----|----------|----------|----------|
| C  | 1.89196  | 3.11426  | -0.35535 |
| C  | 2.78833  | 2.07962  | -0.15055 |
| N  | 1.61441  | -1.12436 | 1.37300  |
| C  | 0.29013  | -0.77675 | 1.47355  |
| N  | -0.19230 | -1.38885 | 2.58860  |
| C  | 0.77109  | -2.25710 | 3.09408  |
| C  | 1.90505  | -2.10329 | 2.31607  |
| Co | -0.52623 | -0.20920 | -0.22912 |
| O  | -1.85600 | -1.42335 | -0.16893 |
| C  | -0.85695 | -2.00089 | -3.45545 |
| C  | -0.35935 | -2.22812 | -4.89388 |
| C  | -1.86003 | -3.07375 | -3.01098 |
| C  | -1.47954 | -0.60337 | -3.38671 |
| C  | -0.67027 | 3.30435  | -0.62697 |
| C  | -0.85927 | 4.26205  | 0.55967  |
| C  | -0.59867 | 4.04742  | -1.97001 |
| C  | -1.82662 | 2.30053  | -0.66350 |
| C  | -1.54289 | -1.13173 | 3.23283  |
| C  | -2.15012 | 0.14822  | 2.64787  |
| C  | -2.44041 | -2.34184 | 2.94349  |
| C  | -1.32581 | -0.91115 | 4.74078  |
| H  | -1.20234 | -2.05551 | -5.58074 |
| H  | 0.44362  | -1.51769 | -5.15117 |
| H  | -1.42202 | -4.08358 | -3.07619 |
| H  | -2.74278 | -3.04408 | -3.66999 |
| H  | -2.16714 | -2.87030 | -1.97292 |
| H  | -0.74225 | 0.18147  | -3.61895 |
| H  | -1.90980 | -0.41811 | -2.39873 |
| H  | -2.29492 | -0.54820 | -4.12409 |
| H  | -0.06624 | 5.02333  | 0.61381  |
| H  | -0.87931 | 3.70188  | 1.50882  |
| H  | -1.81946 | 4.78941  | 0.44654  |
| H  | 0.19137  | 4.81303  | -1.98579 |
| H  | -1.55816 | 4.55775  | -2.14828 |
| H  | -1.93417 | 1.75035  | 0.28481  |
| H  | -2.77333 | 2.84331  | -0.80428 |
| H  | -1.72941 | 1.60465  | -1.51221 |
| H  | -3.04826 | 0.39692  | 3.23360  |
| H  | -1.45051 | 0.99622  | 2.72091  |
| H  | -3.43534 | -2.17085 | 3.38510  |
| H  | -2.53848 | -2.45961 | 1.85277  |
| H  | -0.61152 | -0.09030 | 4.91872  |
| H  | -0.97624 | -1.80935 | 5.26751  |
| H  | -2.29038 | -0.63060 | 5.19134  |
| H  | -0.00446 | -3.25148 | -5.07476 |
| H  | -2.03104 | -3.26659 | 3.38211  |
| H  | -0.42290 | 3.33803  | -2.79528 |
| C  | 4.76835  | -0.78231 | -0.77631 |
| C  | 6.15965  | -0.77830 | -0.66687 |
| C  | 6.74847  | -0.62151 | 0.60939  |
| C  | 5.89473  | -0.44356 | 1.72231  |
| C  | 4.51336  | -0.46389 | 1.52838  |
| H  | 4.29088  | -0.84387 | -1.75529 |
| H  | 3.83578  | -0.27780 | 2.36276  |
| H  | -2.45757 | 0.00760  | 1.60592  |
| N  | 3.96945  | -0.66763 | 0.30800  |
| C  | 2.21765  | 4.49010  | -0.46691 |
| N  | 2.51729  | 5.61122  | -0.55104 |
| C  | 4.19319  | 2.21083  | -0.02749 |

|   |          |          |          |
|---|----------|----------|----------|
| N | 5.34861  | 2.31193  | 0.07363  |
| C | 3.49038  | -3.32571 | -1.30587 |
| N | 4.46245  | -3.89122 | -1.00369 |
| C | 1.38873  | -4.18323 | -3.35066 |
| N | 1.45936  | -5.18557 | -3.93727 |
| C | 3.11192  | -2.84130 | 2.40316  |
| N | 4.11184  | -3.43618 | 2.45110  |
| C | 0.62272  | -3.19872 | 4.14549  |
| N | 0.54780  | -4.00882 | 4.97735  |
| C | 8.16862  | -0.61257 | 0.76782  |
| N | 9.32313  | -0.60464 | 0.89736  |
| C | 6.41404  | -0.22668 | 3.03850  |
| N | 6.82882  | -0.05117 | 4.10883  |
| C | 6.95610  | -0.91789 | -1.84826 |
| N | 7.59632  | -1.03383 | -2.81011 |
| H | -3.01284 | -0.80757 | -0.56020 |
| C | -4.08921 | -0.28838 | -0.84811 |
| O | -4.43403 | 0.61516  | 0.16154  |
| C | -5.12549 | -1.40108 | -0.85076 |
| H | -3.92048 | 0.24482  | -1.79878 |
| C | -5.42788 | 0.03213  | 1.02922  |
| C | -5.51219 | -1.44512 | 0.63538  |
| H | -4.72271 | -2.35184 | -1.23423 |
| H | -5.99205 | -1.11732 | -1.47753 |
| H | -5.12469 | 0.19704  | 2.07622  |
| H | -6.38574 | 0.55949  | 0.85706  |
| H | -4.77117 | -2.03278 | 1.20105  |
| H | -6.50896 | -1.87435 | 0.82049  |

#### LaCo<sup>III</sup>O + THF (S=1)

|                     |          |                          |          |
|---------------------|----------|--------------------------|----------|
| 96                  |          |                          |          |
| thf_percn_ts_u2.out |          | Energy: -2473391.1659134 |          |
| C                   | 0.50310  | -0.95434                 | -1.48394 |
| N                   | 0.15387  | -1.84062                 | -2.45492 |
| C                   | 1.06966  | -2.88876                 | -2.47488 |
| C                   | 2.05040  | -2.58994                 | -1.54528 |
| N                   | 1.72793  | -1.34939                 | -1.00642 |
| B                   | 2.32629  | -0.51220                 | 0.16237  |
| N                   | 2.13453  | 1.00103                  | -0.13804 |
| C                   | 0.85467  | 1.44601                  | -0.34029 |
| N                   | 0.92562  | 2.77933                  | -0.60347 |
| C                   | 2.25725  | 3.18523                  | -0.56793 |
| C                   | 3.01777  | 2.06833                  | -0.27692 |
| N                   | 1.50546  | -0.89923                 | 1.42631  |
| C                   | 0.22300  | -0.41487                 | 1.50236  |
| N                   | -0.32367 | -0.92393                 | 2.63958  |
| C                   | 0.54641  | -1.85863                 | 3.19242  |
| C                   | 1.69263  | -1.85681                 | 2.41703  |
| Co                  | -0.52232 | 0.13857                  | -0.21917 |
| O                   | -1.87194 | -1.04842                 | -0.18208 |
| C                   | -1.02341 | -1.70820                 | -3.40336 |
| C                   | -0.51605 | -1.93566                 | -4.83871 |
| C                   | -2.08121 | -2.74013                 | -2.98774 |
| C                   | -1.58758 | -0.28501                 | -3.31847 |
| C                   | -0.23715 | 3.69603                  | -0.90904 |
| C                   | -0.28327 | 4.79647                  | 0.16328  |

|   |          |          |          |
|---|----------|----------|----------|
| C | -0.04332 | 4.26581  | -2.32396 |
| C | -1.53971 | 2.89515  | -0.86354 |
| C | -1.65959 | -0.52548 | 3.24175  |
| C | -2.13449 | 0.77690  | 2.59087  |
| C | -2.65284 | -1.66507 | 2.97899  |
| C | -1.45864 | -0.26112 | 4.74448  |
| H | -1.34803 | -1.74821 | -5.53514 |
| H | 0.30089  | -1.23616 | -5.08141 |
| H | -1.70051 | -3.77078 | -3.07450 |
| H | -2.95878 | -2.65097 | -3.64809 |
| H | -2.38042 | -2.54332 | -1.94663 |
| H | -0.80946 | 0.47064  | -3.51232 |
| H | -2.04264 | -0.10197 | -2.33863 |
| H | -2.37063 | -0.17948 | -4.08505 |
| H | 0.60960  | 5.43889  | 0.14868  |
| H | -0.38513 | 4.35236  | 1.16701  |
| H | -1.15699 | 5.44079  | -0.02216 |
| H | 0.85945  | 4.88883  | -2.40867 |
| H | -0.90714 | 4.90041  | -2.57676 |
| H | -1.73057 | 2.48837  | 0.14166  |
| H | -2.37459 | 3.57262  | -1.10021 |
| H | -1.55086 | 2.09425  | -1.61949 |
| H | -3.06330 | 1.09349  | 3.08782  |
| H | -1.38410 | 1.57705  | 2.69392  |
| H | -3.63736 | -1.38934 | 3.38761  |
| H | -2.74122 | -1.81925 | 1.89322  |
| H | -0.66901 | 0.49039  | 4.91012  |
| H | -1.21620 | -1.16654 | 5.31720  |
| H | -2.40086 | 0.13509  | 5.15373  |
| H | -0.17148 | -2.96297 | -5.01991 |
| H | -2.33024 | -2.60072 | 3.46464  |
| H | 0.01783  | 3.45018  | -3.06312 |
| C | 4.66752  | -1.00140 | -0.72559 |
| C | 6.04960  | -1.15702 | -0.61364 |
| C | 6.65687  | -1.00906 | 0.65462  |
| C | 5.83408  | -0.67646 | 1.75564  |
| C | 4.45922  | -0.54209 | 1.55970  |
| H | 4.18308  | -1.04958 | -1.70135 |
| H | 3.81040  | -0.23458 | 2.38105  |
| H | -2.37124 | 0.62290  | 1.53448  |
| N | 3.89089  | -0.74215 | 0.34950  |
| C | 2.76273  | 4.49244  | -0.78624 |
| N | 3.21851  | 5.54900  | -0.95904 |
| C | 4.42856  | 2.04614  | -0.15101 |
| N | 5.58817  | 2.02936  | -0.04910 |
| C | 3.13789  | -3.40911 | -1.15111 |
| N | 4.03712  | -4.06253 | -0.80384 |
| C | 0.99924  | -4.08568 | -3.23398 |
| N | 0.97624  | -5.09530 | -3.81193 |
| C | 2.81853  | -2.70683 | 2.55148  |
| N | 3.75436  | -3.39407 | 2.64160  |
| C | 0.30482  | -2.72657 | 4.28889  |
| N | 0.15124  | -3.48154 | 5.16083  |
| C | 8.06863  | -1.16090 | 0.81450  |
| N | 9.21660  | -1.28316 | 0.94458  |
| C | 6.38014  | -0.46173 | 3.06124  |
| N | 6.81634  | -0.28784 | 4.12330  |
| C | 6.81894  | -1.44869 | -1.78540 |
| N | 7.43645  | -1.68795 | -2.73928 |



|   |          |          |          |
|---|----------|----------|----------|
| H | -3.02781 | -0.44163 | -0.23889 |
| C | -4.19134 | 0.05681  | -0.29831 |
| O | -4.81904 | -0.16031 | 0.92445  |
| C | -4.94210 | -0.74575 | -1.34622 |
| H | -4.03421 | 1.13518  | -0.47183 |
| C | -5.62964 | -1.35227 | 0.85495  |
| C | -5.34739 | -1.97399 | -0.51773 |
| H | -4.32720 | -0.98830 | -2.22513 |
| H | -5.83257 | -0.18717 | -1.69310 |
| H | -5.36900 | -2.00911 | 1.70152  |
| H | -6.68802 | -1.04845 | 0.96218  |
| H | -4.49874 | -2.67632 | -0.45339 |
| H | -6.21627 | -2.51560 | -0.92236 |

**LiCo<sup>III</sup>O + THF (S=2)**

96

thf\_percn\_ts\_u4.out      Energy: -2473384.7564438

|    |          |          |          |
|----|----------|----------|----------|
| C  | 0.55451  | -1.34924 | -1.26922 |
| N  | 0.27713  | -2.39683 | -2.08534 |
| C  | 1.39899  | -3.20829 | -2.19516 |
| C  | 2.39946  | -2.61470 | -1.44167 |
| N  | 1.87727  | -1.42799 | -0.92903 |
| B  | 2.40102  | -0.45716 | 0.19513  |
| N  | 2.01126  | 1.04712  | -0.06682 |
| C  | 0.70319  | 1.43083  | -0.18368 |
| N  | 0.66794  | 2.76811  | -0.38865 |
| C  | 1.96304  | 3.26456  | -0.40450 |
| C  | 2.81218  | 2.18858  | -0.20394 |
| N  | 1.73472  | -1.01652 | 1.49522  |
| C  | 0.39092  | -0.81444 | 1.67428  |
| N  | 0.02033  | -1.53898 | 2.76262  |
| C  | 1.09738  | -2.29349 | 3.21237  |
| C  | 2.17249  | -1.98754 | 2.39540  |
| Co | -0.59061 | -0.10634 | -0.06679 |
| O  | -2.35292 | -0.10197 | 0.14943  |
| C  | -1.10644 | -2.60713 | -2.69219 |
| C  | -1.04984 | -3.63848 | -3.82278 |
| C  | -2.03931 | -3.08544 | -1.57054 |
| C  | -1.57167 | -1.25961 | -3.26461 |
| C  | -0.64946 | 3.50503  | -0.61447 |
| C  | -0.41814 | 5.01128  | -0.74805 |
| C  | -1.25116 | 2.95652  | -1.91579 |
| C  | -1.55513 | 3.23143  | 0.59567  |
| C  | -1.39697 | -1.51069 | 3.32489  |
| C  | -1.86230 | -0.04636 | 3.33726  |
| C  | -2.27303 | -2.37749 | 2.41046  |
| C  | -1.41796 | -2.05186 | 4.75884  |
| H  | -2.03693 | -3.65441 | -4.30962 |
| H  | -0.30476 | -3.37316 | -4.59006 |
| H  | -1.65819 | -4.00928 | -1.10555 |
| H  | -3.03320 | -3.29603 | -1.99741 |
| H  | -2.15908 | -2.30617 | -0.80295 |
| H  | -0.85757 | -0.87561 | -4.01062 |
| H  | -1.70393 | -0.50972 | -2.47401 |
| H  | -2.54880 | -1.40018 | -3.75239 |
| H  | 0.19605  | 5.26847  | -1.62392 |

|   |          |          |          |
|---|----------|----------|----------|
| H | 0.02944  | 5.44749  | 0.15850  |
| H | -1.40185 | 5.48440  | -0.89061 |
| H | -0.58903 | 3.16323  | -2.77237 |
| H | -2.23156 | 3.42430  | -2.08620 |
| H | -1.06026 | 3.54351  | 1.52993  |
| H | -2.48378 | 3.80922  | 0.47532  |
| H | -1.83833 | 2.17190  | 0.66362  |
| H | -2.86801 | -0.00407 | 3.78503  |
| H | -1.18416 | 0.57352  | 3.94676  |
| H | -3.29533 | -2.41319 | 2.82081  |
| H | -2.32549 | -1.94008 | 1.40291  |
| H | -0.69456 | -1.53314 | 5.40902  |
| H | -1.24462 | -3.13589 | 4.80783  |
| H | -2.42326 | -1.86929 | 5.16848  |
| H | -0.85518 | -4.65654 | -3.45729 |
| H | -1.88578 | -3.40848 | 2.35520  |
| H | -1.41659 | 1.87193  | -1.84758 |
| C | 4.74130  | -0.59267 | -0.82589 |
| C | 6.13580  | -0.57588 | -0.78060 |
| C | 6.78123  | -0.37821 | 0.46157  |
| C | 5.97864  | -0.16641 | 1.60644  |
| C | 4.59037  | -0.20810 | 1.47806  |
| H | 4.22004  | -0.67916 | -1.78039 |
| H | 3.94802  | -0.00061 | 2.33515  |
| H | -1.93136 | 0.36441  | 2.32159  |
| N | 3.99198  | -0.46255 | 0.29207  |
| C | 2.42244  | 4.59840  | -0.57642 |
| N | 2.89390  | 5.65359  | -0.70572 |
| C | 4.22232  | 2.31347  | -0.15807 |
| N | 5.37693  | 2.46074  | -0.12781 |
| C | 3.67814  | -3.17277 | -1.19007 |
| N | 4.72140  | -3.64200 | -0.97240 |
| C | 1.56612  | -4.43684 | -2.88864 |
| N | 1.79745  | -5.44853 | -3.41349 |
| C | 3.44638  | -2.60745 | 2.43200  |
| N | 4.49142  | -3.12147 | 2.44410  |
| C | 1.16529  | -3.24523 | 4.26509  |
| N | 1.31911  | -4.04890 | 5.09169  |
| C | 8.20684  | -0.36040 | 0.55367  |
| N | 9.36608  | -0.34536 | 0.62892  |
| C | 6.55723  | 0.09714  | 2.88898  |
| N | 7.02090  | 0.30900  | 3.93234  |
| C | 6.87676  | -0.74966 | -1.99263 |
| N | 7.47155  | -0.89560 | -2.97923 |
| H | -3.16232 | 0.49386  | -0.83787 |
| C | -4.07371 | 0.96575  | -1.47727 |
| O | -4.26986 | 2.28891  | -1.07199 |
| C | -5.29287 | 0.17700  | -1.02577 |
| H | -3.79383 | 0.92842  | -2.54342 |
| C | -5.22967 | 2.33031  | 0.00378  |
| C | -5.57963 | 0.86914  | 0.31628  |
| H | -5.08718 | -0.90080 | -0.93120 |
| H | -6.13010 | 0.31367  | -1.73619 |
| H | -4.78477 | 2.86891  | 0.85856  |
| H | -6.10801 | 2.90384  | -0.34783 |
| H | -4.89503 | 0.47055  | 1.08338  |
| H | -6.61617 | 0.74971  | 0.66779  |

**L<sub>4</sub>Co<sup>III</sup>O + xanthene (S=0, open-shell)**

107

xanthene\_ts\_u0\_closed.out Energy: -2689310.7124113

|    |          |          |          |
|----|----------|----------|----------|
| C  | 0.82081  | -0.98244 | -1.52467 |
| N  | 0.54354  | -1.74451 | -2.62701 |
| C  | 1.65480  | -2.52888 | -2.92244 |
| C  | 2.64545  | -2.19990 | -2.01493 |
| N  | 2.13489  | -1.19762 | -1.20461 |
| B  | 2.61768  | -0.58463 | 0.13709  |
| N  | 2.23456  | 0.92167  | 0.17438  |
| C  | 0.94572  | 1.24381  | -0.11961 |
| N  | 0.81939  | 2.59511  | -0.01602 |
| C  | 2.02905  | 3.12519  | 0.42562  |
| C  | 2.92381  | 2.07477  | 0.53274  |
| N  | 1.77306  | -1.34297 | 1.21024  |
| C  | 0.45223  | -1.00209 | 1.31367  |
| N  | -0.07028 | -1.73308 | 2.34139  |
| C  | 0.86544  | -2.68827 | 2.72992  |
| C  | 2.02083  | -2.45230 | 2.00568  |
| Co | -0.33105 | -0.15020 | -0.25514 |
| O  | -1.94045 | -0.69374 | -0.04186 |
| C  | -0.80780 | -1.82086 | -3.32846 |
| C  | -0.62781 | -2.27264 | -4.78526 |
| C  | -1.65782 | -2.83052 | -2.54582 |
| C  | -1.42915 | -0.41778 | -3.34719 |
| C  | -0.44634 | 3.39052  | -0.27869 |
| C  | -1.09738 | 3.68016  | 1.08127  |
| C  | -0.09012 | 4.68072  | -1.03515 |
| C  | -1.37997 | 2.56257  | -1.16664 |
| C  | -1.37925 | -1.45457 | 3.08864  |
| C  | -1.74280 | 0.02705  | 2.91669  |
| C  | -2.45768 | -2.39158 | 2.53743  |
| C  | -1.14715 | -1.69678 | 4.59179  |
| H  | -1.58937 | -2.12684 | -5.30042 |
| H  | 0.13083  | -1.67102 | -5.31230 |
| H  | -1.16818 | -3.81849 | -2.53184 |
| H  | -2.63947 | -2.93941 | -3.03001 |
| H  | -1.81668 | -2.48556 | -1.51322 |
| H  | -0.74767 | 0.30968  | -3.81634 |
| H  | -1.70253 | -0.06904 | -2.34580 |
| H  | -2.35646 | -0.45512 | -3.93868 |
| H  | -0.43053 | 4.27313  | 1.72844  |
| H  | -1.35264 | 2.74063  | 1.59758  |
| H  | -2.02466 | 4.25515  | 0.92929  |
| H  | 0.46882  | 5.40164  | -0.42489 |
| H  | -1.02733 | 5.17427  | -1.33473 |
| H  | -1.78816 | 1.68642  | -0.64234 |
| H  | -2.23640 | 3.19136  | -1.45439 |
| H  | -0.87347 | 2.23587  | -2.08723 |
| H  | -2.61578 | 0.23993  | 3.55094  |
| H  | -0.91113 | 0.67389  | 3.24271  |
| H  | -3.39967 | -2.21853 | 3.07987  |
| H  | -2.61961 | -2.18193 | 1.47131  |
| H  | -0.26457 | -1.14706 | 4.95886  |
| H  | -1.04910 | -2.75782 | 4.85456  |
| H  | -2.02938 | -1.31769 | 5.12967  |
| H  | -0.37998 | -3.33779 | -4.87648 |
| H  | -2.16984 | -3.44747 | 2.67539  |

|   |          |          |          |
|---|----------|----------|----------|
| H | 0.48629  | 4.45581  | -1.94741 |
| C | 4.98339  | -0.42107 | -0.72832 |
| C | 6.36797  | -0.40647 | -0.61339 |
| C | 6.96546  | -0.62590 | 0.65698  |
| C | 6.10124  | -0.81145 | 1.76706  |
| C | 4.72427  | -0.80902 | 1.57170  |
| H | 4.50398  | -0.20632 | -1.68436 |
| H | 4.04983  | -0.87615 | 2.42460  |
| H | -2.01701 | 0.26906  | 1.88636  |
| N | 4.17523  | -0.66685 | 0.33789  |
| C | 2.31422  | 4.46825  | 0.78411  |
| N | 2.60903  | 5.54033  | 1.12638  |
| C | 4.27754  | 2.17763  | 0.93812  |
| N | 5.38900  | 2.26851  | 1.27175  |
| C | 3.91338  | -2.82044 | -1.88667 |
| N | 4.95338  | -3.32923 | -1.76565 |
| C | 1.81573  | -3.53409 | -3.91265 |
| N | 2.05423  | -4.38563 | -4.66824 |
| C | 3.19367  | -3.24816 | 1.97746  |
| N | 4.15662  | -3.90051 | 1.92743  |
| C | 0.67444  | -3.79667 | 3.59634  |
| N | 0.58491  | -4.75094 | 4.25564  |
| C | 8.38042  | -0.62527 | 0.81621  |
| N | 9.53658  | -0.62435 | 0.94624  |
| C | 6.61427  | -0.97876 | 3.09291  |
| N | 7.02526  | -1.11638 | 4.17054  |
| C | 7.16106  | -0.16060 | -1.77937 |
| N | 7.80077  | 0.03523  | -2.72891 |
| H | -3.03166 | -0.49136 | -0.58032 |
| C | -4.30116 | -0.17246 | -0.86889 |
| C | -4.94732 | -1.43333 | -1.23922 |
| C | -4.66941 | 0.35684  | 0.44875  |
| H | -4.18995 | 0.56765  | -1.67357 |
| C | -5.44408 | -2.26264 | -0.20650 |
| C | -5.04953 | -1.90569 | -2.56265 |
| C | -5.18427 | -0.54019 | 1.41250  |
| C | -4.43562 | 1.68635  | 0.85240  |
| C | -5.98015 | -3.52560 | -0.47188 |
| C | -5.59096 | -3.16137 | -2.84125 |
| H | -4.68812 | -1.26828 | -3.37614 |
| C | -5.45852 | -0.13377 | 2.72163  |
| C | -4.70197 | 2.10306  | 2.15659  |
| H | -4.03699 | 2.39419  | 0.12020  |
| C | -6.04544 | -3.97826 | -1.79259 |
| H | -6.34749 | -4.12887 | 0.36298  |
| H | -5.65780 | -3.50978 | -3.87634 |
| H | -5.86215 | -0.86498 | 3.42741  |
| C | -5.21306 | 1.19025  | 3.09427  |
| H | -4.50971 | 3.14009  | 2.44780  |
| H | -6.46535 | -4.96598 | -2.00583 |
| H | -5.42281 | 1.51177  | 4.11891  |
| O | -5.42662 | -1.85258 | 1.10289  |

**LaCo<sup>III</sup>O + xanthene (S=0, closed-shell)**

107

xanthene\_ts\_u0\_open.out Energy: -2689314.7791244

|    |          |          |          |
|----|----------|----------|----------|
| C  | 0.58520  | -1.22992 | -1.35803 |
| N  | 0.27836  | -2.19529 | -2.26734 |
| C  | 1.27808  | -3.16247 | -2.26981 |
| C  | 2.26945  | -2.72494 | -1.40927 |
| N  | 1.85876  | -1.48965 | -0.92220 |
| B  | 2.43337  | -0.53619 | 0.16588  |
| N  | 2.11508  | 0.93902  | -0.20509 |
| C  | 0.79818  | 1.26616  | -0.35570 |
| N  | 0.73532  | 2.57910  | -0.69837 |
| C  | 2.02703  | 3.09579  | -0.76514 |
| C  | 2.89610  | 2.06462  | -0.45618 |
| N  | 1.67451  | -0.91777 | 1.46573  |
| C  | 0.35373  | -0.54985 | 1.55012  |
| N  | -0.11251 | -1.03726 | 2.73450  |
| C  | 0.84921  | -1.86448 | 3.30402  |
| C  | 1.97043  | -1.80139 | 2.49653  |
| Co | -0.50234 | -0.09225 | -0.11823 |
| O  | -1.94501 | -1.10248 | -0.16124 |
| C  | -0.92203 | -2.18877 | -3.20265 |
| C  | -0.45293 | -2.60496 | -4.60849 |
| C  | -1.96663 | -3.15717 | -2.63705 |
| C  | -1.47125 | -0.76053 | -3.29467 |
| C  | -0.52864 | 3.36287  | -0.97568 |
| C  | -0.62008 | 4.50771  | 0.04556  |
| C  | -0.47152 | 3.87382  | -2.42432 |
| C  | -1.74255 | 2.44200  | -0.81521 |
| C  | -1.45630 | -0.70650 | 3.35642  |
| C  | -1.96001 | 0.60972  | 2.75284  |
| C  | -2.40521 | -1.87370 | 3.06194  |
| C  | -1.27136 | -0.48470 | 4.86768  |
| H  | -1.29453 | -2.46162 | -5.30350 |
| H  | 0.38512  | -1.97550 | -4.95116 |
| H  | -1.57084 | -4.18531 | -2.58429 |
| H  | -2.85194 | -3.16159 | -3.29076 |
| H  | -2.27334 | -2.82218 | -1.63436 |
| H  | -0.68104 | -0.04482 | -3.57497 |
| H  | -1.93511 | -0.45807 | -2.34992 |
| H  | -2.25178 | -0.74388 | -4.06887 |
| H  | 0.20827  | 5.22540  | -0.05140 |
| H  | -0.62580 | 4.10861  | 1.07315  |
| H  | -1.55812 | 5.06097  | -0.11840 |
| H  | 0.35991  | 4.57447  | -2.59215 |
| H  | -1.40623 | 4.40974  | -2.65229 |
| H  | -1.83571 | 2.06073  | 0.21355  |
| H  | -2.65223 | 3.02702  | -1.02166 |
| H  | -1.72823 | 1.61064  | -1.53743 |
| H  | -2.84298 | 0.93285  | 3.32007  |
| H  | -1.19447 | 1.39929  | 2.81751  |
| H  | -3.39362 | -1.66399 | 3.49642  |
| H  | -2.51013 | -1.99791 | 1.97335  |
| H  | -0.50045 | 0.27776  | 5.06797  |
| H  | -1.02077 | -1.40271 | 5.41473  |
| H  | -2.22715 | -0.12218 | 5.27629  |
| H  | -0.16086 | -3.66112 | -4.67742 |
| H  | -2.02678 | -2.81042 | 3.50400  |
| H  | -0.37341 | 3.03036  | -3.12733 |
| C  | 4.78104  | -0.89045 | -0.76739 |
| C  | 6.17320  | -0.93515 | -0.68600 |
| C  | 6.79852  | -0.67390 | 0.55470  |

|   |          |          |          |
|---|----------|----------|----------|
| C | 5.98019  | -0.34013 | 1.65892  |
| C | 4.59506  | -0.31961 | 1.49489  |
| H | 4.27834  | -1.03031 | -1.72494 |
| H | 3.94450  | -0.01703 | 2.31661  |
| H | -2.26723 | 0.48421  | 1.70889  |
| N | 4.01392  | -0.63211 | 0.31485  |
| C | 2.39933  | 4.42711  | -1.08294 |
| N | 2.74235  | 5.50906  | -1.33866 |
| C | 4.30850  | 2.15981  | -0.40157 |
| N | 5.46948  | 2.23096  | -0.35348 |
| C | 3.44180  | -3.42479 | -1.02941 |
| N | 4.40948  | -3.98217 | -0.69922 |
| C | 1.27393  | -4.41979 | -2.92863 |
| N | 1.31779  | -5.47797 | -3.41023 |
| C | 3.16851  | -2.54466 | 2.63824  |
| N | 4.16064  | -3.14692 | 2.73277  |
| C | 0.71506  | -2.70941 | 4.43646  |
| N | 0.66523  | -3.45106 | 5.33146  |
| C | 8.22099  | -0.71783 | 0.68200  |
| N | 9.37761  | -0.75330 | 0.78539  |
| C | 6.53965  | -0.01678 | 2.93626  |
| N | 6.98702  | 0.24391  | 3.97566  |
| C | 6.93428  | -1.23222 | -1.86129 |
| N | 7.54536  | -1.47641 | -2.81805 |
| H | -3.17465 | -0.54758 | 0.05521  |
| C | -4.37371 | -0.18287 | -0.00161 |
| C | -4.82107 | -0.91512 | -1.20755 |
| C | -5.06387 | -0.62685 | 1.22786  |
| H | -4.31827 | 0.90934  | -0.12528 |
| C | -5.26477 | -2.24447 | -1.04265 |
| C | -4.75870 | -0.39740 | -2.51208 |
| C | -5.48820 | -1.97076 | 1.29695  |
| C | -5.28215 | 0.18909  | 2.35156  |
| C | -5.61867 | -3.04039 | -2.13577 |
| C | -5.11722 | -1.17826 | -3.61279 |
| H | -4.41341 | 0.63194  | -2.65323 |
| C | -6.04703 | -2.50557 | 2.46144  |
| C | -5.85066 | -0.32740 | 3.51806  |
| H | -4.99114 | 1.24287  | 2.29962  |
| C | -5.54052 | -2.50361 | -3.42380 |
| H | -5.95866 | -4.06419 | -1.95728 |
| H | -5.06266 | -0.75878 | -4.62195 |
| H | -6.35178 | -3.55571 | 2.46808  |
| C | -6.21703 | -1.68189 | 3.57785  |
| H | -6.00622 | 0.32225  | 4.38461  |
| H | -5.81796 | -3.12052 | -4.28407 |
| H | -6.65402 | -2.09413 | 4.49251  |
| O | -5.37553 | -2.80054 | 0.20860  |

**LaCo<sup>III</sup>O + xanthene (S=1)**

107

|                    |                          |          |          |
|--------------------|--------------------------|----------|----------|
| xanthene_ts_u2.out | Energy: -2689316.7319590 |          |          |
| C                  | 0.55533                  | -1.17853 | -1.35576 |
| N                  | 0.23801                  | -2.13448 | -2.26993 |
| C                  | 1.22619                  | -3.11265 | -2.28132 |
| C                  | 2.22226                  | -2.69348 | -1.41745 |

|    |          |          |          |
|----|----------|----------|----------|
| N  | 1.82755  | -1.45671 | -0.91967 |
| B  | 2.41848  | -0.53414 | 0.18526  |
| N  | 2.11112  | 0.94892  | -0.15934 |
| C  | 0.79765  | 1.27857  | -0.31945 |
| N  | 0.73389  | 2.60019  | -0.61890 |
| C  | 2.02408  | 3.12376  | -0.65000 |
| C  | 2.89208  | 2.08551  | -0.36016 |
| N  | 1.66957  | -0.93046 | 1.49023  |
| C  | 0.36036  | -0.53324 | 1.60842  |
| N  | -0.09418 | -1.03212 | 2.78943  |
| C  | 0.85957  | -1.88748 | 3.33025  |
| C  | 1.96710  | -1.83558 | 2.50280  |
| Co | -0.51155 | -0.07855 | -0.10621 |
| O  | -1.87423 | -1.18716 | 0.04498  |
| C  | -0.97302 | -2.11480 | -3.18380 |
| C  | -0.52093 | -2.47370 | -4.61047 |
| C  | -1.99664 | -3.11434 | -2.63334 |
| C  | -1.54028 | -0.69240 | -3.21484 |
| C  | -0.53730 | 3.37315  | -0.88015 |
| C  | -0.65161 | 4.48991  | 0.16898  |
| C  | -0.48566 | 3.92159  | -2.31468 |
| C  | -1.73090 | 2.42106  | -0.74235 |
| C  | -1.41113 | -0.67274 | 3.45199  |
| C  | -1.94205 | 0.61803  | 2.82053  |
| C  | -2.38053 | -1.84105 | 3.23924  |
| C  | -1.15414 | -0.39682 | 4.94413  |
| H  | -1.38167 | -2.34319 | -5.28446 |
| H  | 0.28711  | -1.80497 | -4.95069 |
| H  | -1.59269 | -4.14039 | -2.63199 |
| H  | -2.89814 | -3.10101 | -3.26407 |
| H  | -2.27496 | -2.82312 | -1.60938 |
| H  | -0.76290 | 0.04619  | -3.46816 |
| H  | -2.00073 | -0.43296 | -2.25535 |
| H  | -2.32575 | -0.65284 | -3.98188 |
| H  | 0.16214  | 5.22609  | 0.08788  |
| H  | -0.64723 | 4.06603  | 1.18654  |
| H  | -1.60103 | 5.02765  | 0.01938  |
| H  | 0.33900  | 4.63531  | -2.46090 |
| H  | -1.42577 | 4.45310  | -2.53050 |
| H  | -1.82234 | 2.02449  | 0.28176  |
| H  | -2.65566 | 2.98235  | -0.94657 |
| H  | -1.68885 | 1.60423  | -1.48150 |
| H  | -2.81532 | 0.94891  | 3.39917  |
| H  | -1.18377 | 1.41725  | 2.83941  |
| H  | -3.35430 | -1.59642 | 3.68925  |
| H  | -2.51901 | -2.00637 | 2.16029  |
| H  | -0.37931 | 0.37635  | 5.07737  |
| H  | -0.86704 | -1.29332 | 5.50951  |
| H  | -2.09023 | -0.02534 | 5.38888  |
| H  | -0.19099 | -3.51598 | -4.71345 |
| H  | -2.00469 | -2.76341 | 3.71235  |
| H  | -0.37606 | 3.09826  | -3.03955 |
| C  | 4.75193  | -0.88300 | -0.78339 |
| C  | 6.14457  | -0.93929 | -0.72075 |
| C  | 6.78714  | -0.71556 | 0.51874  |
| C  | 5.98510  | -0.40565 | 1.64142  |
| C  | 4.59805  | -0.36998 | 1.49509  |
| H  | 4.23630  | -0.99691 | -1.73761 |
| H  | 3.96036  | -0.08239 | 2.33209  |

|   |          |          |          |
|---|----------|----------|----------|
| H | -2.27271 | 0.44425  | 1.79069  |
| N | 4.00011  | -0.64713 | 0.31490  |
| C | 2.38989  | 4.46586  | -0.92630 |
| N | 2.72214  | 5.55830  | -1.14957 |
| C | 4.30383  | 2.17639  | -0.28590 |
| N | 5.46454  | 2.23969  | -0.22282 |
| C | 3.38993  | -3.40735 | -1.04944 |
| N | 4.35452  | -3.97682 | -0.73107 |
| C | 1.20775  | -4.35831 | -2.96124 |
| N | 1.23620  | -5.40625 | -3.46586 |
| C | 3.15436  | -2.60085 | 2.61587  |
| N | 4.13832  | -3.21935 | 2.68871  |
| C | 0.72458  | -2.73888 | 4.45775  |
| N | 0.66403  | -3.48218 | 5.35077  |
| C | 8.21068  | -0.77375 | 0.62737  |
| N | 9.36814  | -0.82089 | 0.71554  |
| C | 6.56262  | -0.11896 | 2.91959  |
| N | 7.02450  | 0.11239  | 3.95959  |
| C | 6.88861  | -1.21184 | -1.91291 |
| N | 7.48585  | -1.43596 | -2.88323 |
| H | -3.09600 | -0.64638 | -0.14710 |
| C | -4.29230 | -0.26976 | -0.30424 |
| C | -4.79855 | -1.08979 | -1.42728 |
| C | -4.95994 | -0.59459 | 0.97585  |
| H | -4.22153 | 0.80667  | -0.52103 |
| C | -5.24367 | -2.39721 | -1.13786 |
| C | -4.82383 | -0.66781 | -2.76735 |
| C | -5.39681 | -1.92211 | 1.17079  |
| C | -5.14810 | 0.32059  | 2.02543  |
| C | -5.65564 | -3.27265 | -2.14659 |
| C | -5.24355 | -1.52739 | -3.78485 |
| H | -4.49916 | 0.35053  | -3.00362 |
| C | -5.95518 | -2.34088 | 2.38183  |
| C | -5.71615 | -0.07995 | 3.23669  |
| H | -4.83322 | 1.35868  | 1.87965  |
| C | -5.64766 | -2.83585 | -3.47432 |
| H | -5.98946 | -4.27704 | -1.87195 |
| H | -5.25315 | -1.18189 | -4.82303 |
| H | -6.27559 | -3.38122 | 2.48526  |
| C | -6.10734 | -1.41623 | 3.41892  |
| H | -5.85155 | 0.64647  | 4.04368  |
| H | -5.97093 | -3.51525 | -4.26896 |
| H | -6.54608 | -1.73666 | 4.36885  |
| O | -5.30476 | -2.84717 | 0.15899  |

**LaCo<sup>III</sup>O + xanthene (S=2)**

107

|                    |          |                  |          |
|--------------------|----------|------------------|----------|
| xanthene_ts_u4.out | Energy:  | -2689310.8834264 |          |
| C                  | 0.31257  | -1.26137         | -0.81598 |
| N                  | -0.14866 | -2.38404         | -1.41610 |
| C                  | 0.89089  | -3.29209         | -1.56183 |
| C                  | 2.02851  | -2.68746         | -1.04723 |
| N                  | 1.65824  | -1.41046         | -0.63023 |
| B                  | 2.38361  | -0.31012         | 0.23703  |
| N                  | 2.20240  | 1.14570          | -0.33473 |
| C                  | 0.96872  | 1.63315          | -0.68540 |



|    |          |          |          |
|----|----------|----------|----------|
| N  | 1.13376  | 2.89086  | -1.14908 |
| C  | 2.47176  | 3.25207  | -1.04223 |
| C  | 3.14589  | 2.16097  | -0.52718 |
| N  | 1.72532  | -0.45948 | 1.63363  |
| C  | 0.51027  | 0.13724  | 1.85883  |
| N  | 0.04591  | -0.35780 | 3.03705  |
| C  | 0.88158  | -1.37424 | 3.48414  |
| C  | 1.92872  | -1.45942 | 2.58493  |
| Co | -0.54404 | 0.45138  | -0.01625 |
| O  | -2.18925 | 0.76235  | 0.42522  |
| C  | -1.61336 | -2.52552 | -1.81637 |
| C  | -1.83617 | -3.79189 | -2.64507 |
| C  | -2.44421 | -2.58503 | -0.52625 |
| C  | -1.96681 | -1.29545 | -2.66452 |
| C  | 0.04388  | 3.79075  | -1.71037 |
| C  | -0.13268 | 4.97159  | -0.74364 |
| C  | 0.47726  | 4.24407  | -3.11513 |
| C  | -1.26938 | 3.01329  | -1.82630 |
| C  | -1.23180 | 0.11022  | 3.72261  |
| C  | -1.48820 | 1.56883  | 3.32111  |
| C  | -2.36712 | -0.81346 | 3.26223  |
| C  | -1.04470 | 0.05287  | 5.24749  |
| H  | -2.89204 | -3.79832 | -2.95682 |
| H  | -1.22063 | -3.80843 | -3.55843 |
| H  | -2.12732 | -3.43148 | 0.10483  |
| H  | -3.50551 | -2.71969 | -0.78460 |
| H  | -2.35863 | -1.64895 | 0.04521  |
| H  | -1.25696 | -1.17278 | -3.49813 |
| H  | -1.97860 | -0.37685 | -2.06042 |
| H  | -2.97510 | -1.42245 | -3.08037 |
| H  | 0.78026  | 5.58063  | -0.65350 |
| H  | -0.41870 | 4.60854  | 0.25714  |
| H  | -0.93480 | 5.62667  | -1.11848 |
| H  | 1.38156  | 4.86902  | -3.10851 |
| H  | -0.33185 | 4.84777  | -3.55474 |
| H  | -1.66448 | 2.70069  | -0.84969 |
| H  | -2.01307 | 3.67734  | -2.29398 |
| H  | -1.16203 | 2.12281  | -2.46655 |
| H  | -2.38600 | 1.91493  | 3.85766  |
| H  | -0.63954 | 2.20993  | 3.61193  |
| H  | -3.30175 | -0.52583 | 3.76822  |
| H  | -2.52307 | -0.70666 | 2.17864  |
| H  | -0.11715 | 0.56079  | 5.56006  |
| H  | -1.04998 | -0.96973 | 5.64729  |
| H  | -1.89202 | 0.58045  | 5.71175  |
| H  | -1.66233 | -4.71047 | -2.06583 |
| H  | -2.14815 | -1.86545 | 3.51185  |
| H  | 0.65093  | 3.37212  | -3.76667 |
| C  | 4.57485  | -0.78506 | -0.92975 |
| C  | 5.95321  | -0.97599 | -1.01759 |
| C  | 6.72935  | -0.92369 | 0.16351  |
| C  | 6.07332  | -0.63894 | 1.38343  |
| C  | 4.69029  | -0.45009 | 1.38479  |
| H  | 3.95296  | -0.79325 | -1.82729 |
| H  | 4.17384  | -0.16233 | 2.30051  |
| H  | -1.68067 | 1.66381  | 2.24517  |
| N  | 3.95888  | -0.56316 | 0.25506  |
| C  | 3.05818  | 4.50676  | -1.35389 |
| N  | 3.57877  | 5.52196  | -1.58102 |

|   |          |          |          |
|---|----------|----------|----------|
| C | 4.53543  | 2.15492  | -0.24635 |
| N | 5.67695  | 2.18324  | -0.02036 |
| C | 3.30025  | -3.30320 | -0.93327 |
| N | 4.33855  | -3.82213 | -0.84342 |
| C | 0.87600  | -4.60884 | -2.09512 |
| N | 0.96282  | -5.69305 | -2.50660 |
| C | 2.96074  | -2.42970 | 2.57131  |
| N | 3.80840  | -3.22723 | 2.52542  |
| C | 0.70778  | -2.24802 | 4.59031  |
| N | 0.62315  | -3.02309 | 5.45353  |
| C | 8.14263  | -1.12858 | 0.12174  |
| N | 9.29189  | -1.29522 | 0.08745  |
| C | 6.79678  | -0.52442 | 2.61314  |
| N | 7.37810  | -0.43240 | 3.61417  |
| C | 6.54686  | -1.22223 | -2.29670 |
| N | 7.02142  | -1.42501 | -3.33692 |
| H | -3.42274 | 0.92816  | -0.27743 |
| C | -4.58914 | 1.07931  | -0.55002 |
| C | -4.90602 | 0.40677  | -1.83211 |
| C | -5.25762 | 0.47685  | 0.63063  |
| H | -4.67474 | 2.17753  | -0.59645 |
| C | -5.43933 | -0.89785 | -1.81248 |
| C | -4.64408 | 0.98877  | -3.08585 |
| C | -5.73686 | -0.84505 | 0.54818  |
| C | -5.32646 | 1.12302  | 1.87728  |
| C | -5.69808 | -1.60296 | -2.99405 |
| C | -4.89696 | 0.29832  | -4.27264 |
| H | -4.22523 | 2.00050  | -3.11512 |
| C | -6.25379 | -1.50988 | 1.66585  |
| C | -5.84730 | 0.47670  | 2.99950  |
| H | -4.94433 | 2.14606  | 1.95786  |
| C | -5.42288 | -1.00317 | -4.22530 |
| H | -6.11383 | -2.61204 | -2.92520 |
| H | -4.68277 | 0.76931  | -5.23668 |
| H | -6.61405 | -2.53592 | 1.54962  |
| C | -6.30483 | -0.84675 | 2.89407  |
| H | -5.88902 | 0.99739  | 3.96103  |
| H | -5.62148 | -1.55195 | -5.15096 |
| H | -6.70805 | -1.36262 | 3.77101  |
| O | -5.72044 | -1.54452 | -0.63523 |

## References

---

[1] M. Reiher, O. Salomon, B. A. Hess, Reparameterization of hybrid functionals based on energy differences of states of different multiplicity. *Theor. Chem. Acc.* **2001**, *107*, 48–55. doi: 10.1007/s00214-001-0300-3

[2] <https://web.archive.org/web/20181004171955/https://www.chemie.uni-bonn.de/pctc/mulliken-center/software/dft-d3/functionals>

[3] M. K. Goetz, J. S. Anderson, Experimental Evidence for  $pK_a$ -Driven Asynchronicity in C–H Activation by a Terminal Co(III)–Oxo Complex, *J. Am. Chem. Soc.* **2019**, *141*, 4051–4062. DOI: 10.1021/jacs.8b13490

[4] D. Bím, M. Maldonado-Domínguez, L. Rulišek, M. Srnec, Beyond the classical thermodynamic contributions to hydrogen atom abstraction reactivity. *Proc. Natl. Acad. Sci. U.S.A.* **2018**, *115*, E10287–E10294. DOI: 10.1073/pnas.1806399115
